# Supplementary material for: Multifractal analysis of vegetation regulation on ecohydrological processes in a small watershed
Source: PeerJ journal article supplement (doi:10.7717/peerj.20496), 2026-01-12
Supplement: Figure_2_data.zip [file Precipitation-EEMD.xlsx]

## Sheet: Sheet1
IMF components		IMF1	IMF2	IMF3	IMF4	IMF5	IMF6	IMF7	IMF8	IMF9	IMF10	RES
Variance Ratio		46.7499	24.7266	10.2466	4.57883	2.24086	2.00516	8.21239	0.475308	0.613766	0.0167426	0.133867
Mean Period		3.57423	8.20599	14.4145	31.7536	50.9535	109.55	365.167	365.167	2191	2191	2191
20170101	0.02	0.837224	0.202843	-1.63781	0.331232	0.609194	-1.83926	-9.47347	-1.51341	-0.272962	0.0368954	12.9264		-0.597744
20170102	0	-0.0752147	0.466041	-1.63889	0.392451	0.573398	-1.73397	-9.58201	-1.47249	-0.265044	0.0348958	12.9286		-1.24806
20170103	0	-0.0597762	0.832233	-1.48242	0.438614	0.536359	-1.63478	-9.68468	-1.43162	-0.25721	0.0329008	12.9307		-0.709959
20170104	0.15	-0.322279	0.953734	-1.19369	0.469804	0.498386	-1.5415	-9.78155	-1.39082	-0.249462	0.0309104	12.9328		-0.56224
20170105	0.92	0.397875	0.600715	-0.798021	0.486103	0.459785	-1.45392	-9.87269	-1.35008	-0.241799	0.0289247	12.9349		0.200568
20170106	1.59	-0.232576	-0.0256856	-0.320554	0.487594	0.420861	-1.37184	-9.95816	-1.30941	-0.234221	0.0269436	12.9371		-0.578816
20170107	0.97	-0.0350307	-0.754976	0.212363	0.474359	0.381921	-1.29505	-10.038	-1.2688	-0.226726	0.0249671	12.9392		-0.577643
20170108	0.16	0.0105618	-1.29706	0.761953	0.446481	0.343271	-1.22334	-10.1124	-1.22827	-0.219317	0.0229953	12.9413		-0.524541
20170109	1.05	-0.064277	-0.950466	1.26409	0.404043	0.305219	-1.15651	-10.1812	-1.18781	-0.211991	0.021028	12.9434		0.249343
20170110	2.13	-1.39704	0.679807	1.64221	0.347128	0.268069	-1.09436	-10.2447	-1.14744	-0.204749	0.0190654	12.9455		0.924973
20170111	5.97	1.74647	2.48535	1.81102	0.275818	0.232129	-1.03667	-10.3028	-1.10714	-0.19759	0.0171074	12.9476		6.04284
20170112	5.92	1.85841	2.35317	1.70888	0.19048	0.197704	-0.983245	-10.3556	-1.06693	-0.190515	0.015154	12.9497		5.92046
20170113	0.39	-2.0288	0.144664	1.35453	0.0927326	0.165102	-0.933879	-10.4033	-1.0268	-0.183522	0.0132052	12.9518		-0.52961
20170114	0	0.0789787	-1.71528	0.855385	-0.0149702	0.134628	-0.888363	-10.4458	-0.986762	-0.176613	0.011261	12.9539		-0.780914
20170115	0	-0.343628	-1.64423	0.345987	-0.128994	0.106588	-0.846494	-10.4832	-0.946817	-0.169786	0.00932146	12.956		-1.64187
20170116	0	0.337912	-0.399893	-0.0612837	-0.242486	0.0812899	-0.808065	-10.5157	-0.906967	-0.163041	0.00738648	12.9581		-0.123265
20170117	0	-0.153517	0.521032	-0.307466	-0.347264	0.0590389	-0.772871	-10.5432	-0.867216	-0.156379	0.00545609	12.9602		0.0600492
20170118	0.03	-0.268345	0.642281	-0.415428	-0.436064	0.0401416	-0.740706	-10.5658	-0.827565	-0.149798	0.0035303	12.9623		-0.041492
20170119	0	-0.0229681	0.415505	-0.44974	-0.503482	0.0249043	-0.711364	-10.5836	-0.788019	-0.143299	0.00160909	12.9644		-0.0572032
20170120	0.08	0.353636	0.262084	-0.49101	-0.546655	0.0136289	-0.684641	-10.5967	-0.748579	-0.136882	-0.000307524	12.9664		0.12471
20170121	0	0.106417	0.187071	-0.55646	-0.564318	0.00658901	-0.66033	-10.6051	-0.709249	-0.130545	-0.00221956	12.9685		-0.262972
20170122	0	-0.53995	0.1384	-0.592543	-0.555711	0.00401032	-0.638227	-10.6089	-0.670031	-0.12429	-0.00412701	12.9706		-0.994092
20170123	0	0.221928	0.0950202	-0.540668	-0.522167	0.00610865	-0.618124	-10.6082	-0.630929	-0.118115	-0.00602989	12.9727		-0.22372
20170124	0.24	-0.0701237	-0.0973923	-0.364677	-0.466073	0.0131116	-0.599818	-10.603	-0.591945	-0.112021	-0.00792819	12.9747		-0.532193
20170125	0	0.552705	-0.63067	-0.0697581	-0.392527	0.0252556	-0.583101	-10.5934	-0.553082	-0.106007	-0.00982193	12.9768		-0.147723
20170126	0	0.172568	-1.33858	0.266343	-0.308837	0.0427236	-0.56777	-10.5795	-0.514343	-0.100073	-0.0117111	12.9789		-0.899667
20170127	0.5	-0.257565	-0.888769	0.532682	-0.221827	0.0655514	-0.553618	-10.5612	-0.475731	-0.0942186	-0.0135957	12.9809		-0.613652
20170128	0.57	-2.64638	1.07525	0.640643	-0.138078	0.0937162	-0.540439	-10.5388	-0.437249	-0.0884438	-0.0154757	12.983		-0.930484
20170129	8.69	4.81847	2.55229	0.49013	-0.0674097	0.127328	-0.528028	-10.5122	-0.398899	-0.0827483	-0.0173512	12.985		7.86089
20170130	0	-3.85654	1.89372	0.0760733	-0.0178241	0.166581	-0.516184	-10.4816	-0.360685	-0.0771319	-0.0192221	12.9871		-1.88675
20170131	3.3	1.23864	0.647343	-0.511618	0.00700296	0.211608	-0.504718	-10.4469	-0.322609	-0.0715943	-0.0210885	12.9891		1.37436
20170201	1.29	-0.00828549	-0.223443	-1.06433	0.00590528	0.262479	-0.493454	-10.4084	-0.284674	-0.0661353	-0.0229503	12.9912		-1.29606
20170202	0.1	-0.0262942	-1.0752	-1.30425	-0.0237812	0.319491	-0.48222	-10.3659	-0.246883	-0.0607547	-0.0248076	12.9932		-2.40575
20170203	0.02	0.905305	-1.99291	-1.03333	-0.083406	0.383277	-0.470843	-10.3196	-0.209239	-0.0554521	-0.0266603	12.9953		-2.12094
20170204	0	0.135323	-2.55904	-0.180692	-0.172849	0.454529	-0.459153	-10.2696	-0.171745	-0.0502275	-0.0285085	12.9973		-2.60441
20170205	0	-0.710348	-1.94679	1.10591	-0.296495	0.5338	-0.446978	-10.2159	-0.134403	-0.0450805	-0.0303522	12.9993		-1.55122
20170206	0.11	-5.80761	0.787303	2.45877	-0.458377	0.621404	-0.43415	-10.1586	-0.0972176	-0.0400109	-0.0321913	13.0014		-2.56154
20170207	16.03	7.21765	3.32411	3.39806	-0.659738	0.717284	-0.420518	-10.0978	-0.06019	-0.0350185	-0.0340259	13.0034		13.9398
20170208	6.23	-1.50775	2.1287	3.53557	-0.892744	0.820964	-0.405937	-10.0335	-0.0233238	-0.030103	-0.0358559	13.0054		4.15652
20170209	0.09	-4.23839	-0.710465	2.87122	-1.13435	0.931269	-0.390262	-9.96573	0.0133783	-0.0252642	-0.0376814	13.0074		-2.07764
20170210	0.14	-1.78428	-1.90053	1.6369	-1.36089	1.04678	-0.373332	-9.89466	0.0499135	-0.020502	-0.0395025	13.0094		-2.04791
20170211	4.62	3.49468	-1.31901	0.0891823	-1.54684	1.16585	-0.354968	-9.82031	0.0862787	-0.0158159	-0.0413189	13.0115		2.26486
20170212	0	-0.243207	-0.256195	-1.52917	-1.65353	1.28671	-0.334979	-9.74276	0.122471	-0.0112059	-0.0431309	13.0135		-2.02858
20170213	0	-1.61391	0.851703	-3.07806	-1.63184	1.40757	-0.313155	-9.66206	0.158488	-0.00667163	-0.0449384	13.0155		-3.84026
20170214	0.61	-0.287701	2.08492	-4.46998	-1.44136	1.52648	-0.289282	-9.57828	0.194327	-0.00221291	-0.0467413	13.0175		-2.67276
20170215	3.69	1.02474	2.68247	-5.47839	-1.0757	1.64107	-0.263143	-9.49149	0.229984	0.00217051	-0.0485398	13.0195		-1.77118
20170216	0.03	-0.54112	1.75977	-5.75468	-0.564954	1.74799	-0.234524	-9.40176	0.265456	0.00647886	-0.0503337	13.0215		-4.53603
20170217	0.09	-0.26455	-0.550836	-4.9271	0.0374349	1.84359	-0.203214	-9.30915	0.300742	0.0107124	-0.0521231	13.0235		-5.74249
20170218	0.23	-0.418673	-3.91258	-2.76113	0.665374	1.92431	-0.169003	-9.21373	0.335838	0.0148713	-0.0539081	13.0255		-7.09238
20170219	6.68	5.75917	-6.65773	0.572144	1.2475	1.98651	-0.131681	-9.11556	0.370741	0.0189559	-0.0556885	13.0275		-0.326407
20170220	0.75	-8.70923	-3.51547	4.32835	1.71226	2.02648	-0.0910343	-9.01471	0.405448	0.0229663	-0.0574645	13.0295		-7.89635
20170221	29.96	8.61122	5.14363	7.40328	1.98813	2.04069	-0.04685	-8.91125	0.439957	0.0269028	-0.0592359	13.0315		21.1581
20170222	26.29	-0.376004	8.58084	8.6385	2.00482	2.02591	0.0010811	-8.80525	0.474264	0.0307657	-0.0610029	13.0334		16.8433
20170223	23.39	4.19999	3.08206	7.34714	1.72165	1.97962	0.052945	-8.69677	0.508367	0.0345551	-0.0627654	13.0354		14.6292
20170224	2.87	-5.94582	-4.0669	4.28745	1.19525	1.90087	0.108891	-8.58587	0.542263	0.0382714	-0.0645234	13.0374		-5.72527
20170225	0.41	-0.86953	-6.76582	0.569241	0.510471	1.7897	0.169035	-8.47263	0.575949	0.0419147	-0.0662769	13.0394		-7.06611
20170226	0	0.720935	-4.87023	-2.8041	-0.246676	1.64662	0.233455	-8.35711	0.609422	0.0454853	-0.068026	13.0413		-6.95339
20170227	0.11	0.882379	-1.44736	-5.1124	-0.990457	1.47244	0.302215	-8.23937	0.642679	0.0489833	-0.0697706	13.0433		-5.67738
20170228	0	0.339032	0.277049	-5.96314	-1.63844	1.26815	0.375372	-8.11948	0.675717	0.0524092	-0.0715107	13.0453		-5.34706
20170301	0	0.576131	-0.16026	-5.43944	-2.12245	1.03508	0.452995	-7.99751	0.708534	0.055763	-0.0732464	13.0472		-5.02357
20170302	0	-0.598299	-0.537799	-4.14972	-2.38924	0.775061	0.535158	-7.87353	0.741127	0.059045	-0.0749776	13.0492		-5.28581
20170303	0.42	-2.56303	1.1667	-2.85258	-2.39142	0.490452	0.621917	-7.74759	0.773492	0.0622555	-0.0767043	13.0511		-4.2489
20170304	8.2	1.2666	4.30305	-2.03523	-2.09207	0.183898	0.713319	-7.61976	0.805628	0.0653947	-0.0784266	13.0531		3.53442
20170305	13.39	3.09056	6.4113	-1.85643	-1.49488	-0.141472	0.809389	-7.49011	0.83753	0.0684628	-0.0801444	13.055		7.64544
20170306	5.48	-5.07571	6.55481	-2.19258	-0.65922	-0.482473	0.910145	-7.35871	0.869196	0.07146	-0.0818578	13.057		-0.713481
20170307	14.43	4.78019	4.93438	-2.57744	0.309767	-0.835737	1.0156	-7.22562	0.900624	0.0743867	-0.0835667	13.0589		7.13713
20170308	3.37	-2.10686	-0.754485	-2.37263	1.29461	-1.19777	1.12574	-7.09091	0.93181	0.0772429	-0.0852712	13.0609		-5.23397
20170309	0.26	1.40741	-8.90463	-1.25705	2.18559	-1.56491	1.24053	-6.95463	0.962752	0.0800291	-0.0869713	13.0628		-8.75426
20170310	0.33	2.41205	-12.3051	0.849195	2.89267	-1.93339	1.35991	-6.81687	0.993446	0.0827453	-0.0886669	13.0648		-9.04385
20170311	0	-7.81956	-5.98797	3.56779	3.35515	-2.29926	1.48378	-6.67768	1.02389	0.0853918	-0.0903581	13.0667		-10.2397
20170312	3.85	-18.8784	6.495	5.9146	3.52401	-2.65827	1.61203	-6.53712	1.05408	0.0879689	-0.0920448	13.0686		-6.46875
20170313	50.57	20.0772	14.0131	6.7509	3.35949	-3.00549	1.74448	-6.39528	1.08402	0.0904768	-0.0937271	13.0705		40.8412
20170314	2.08	-18.0494	6.47265	5.31915	2.85587	-3.3344	1.88099	-6.2522	1.11369	0.0929158	-0.095405	13.0725		-6.25756
20170315	1.36	-4.66928	-4.61249	2.38568	2.07825	-3.63825	2.02133	-6.10796	1.14311	0.095286	-0.0970785	13.0744		-6.89609
20170316	0.03	2.02402	-8.66014	-0.905122	1.1189	-3.91057	2.16529	-5.96262	1.17226	0.0975877	-0.0987475	13.0763		-7.54124
20170317	0.21	2.97117	-6.4022	-3.52008	0.0772355	-4.1451	2.31262	-5.81625	1.20114	0.0998211	-0.100412	13.0782		-6.95111
20170318	0.04	1.79031	-2.87989	-4.74818	-0.949565	-4.33574	2.46307	-5.66892	1.22975	0.101987	-0.102072	13.0801		-5.83776
20170319	0.25	-1.08061	-0.385247	-4.51051	-1.88278	-4.47641	2.61632	-5.52068	1.25809	0.104084	-0.103728	13.082		-5.97637
20170320	0.53	-1.60452	0.702056	-3.17356	-2.67205	-4.56112	2.77209	-5.37162	1.28615	0.106114	-0.10538	13.0839		-4.07602
20170321	9.02	5.3035	0.462758	-1.33056	-3.28207	-4.58463	2.93005	-5.22179	1.31394	0.108077	-0.107027	13.0859		4.43571
20170322	5.91	1.1779	0.297244	0.298697	-3.68167	-4.54226	3.08992	-5.07125	1.34144	0.109973	-0.108669	13.0878		1.77384
20170323	0.03	-8.16049	2.30072	1.16108	-3.84506	-4.43041	3.2514	-4.92009	1.36866	0.111801	-0.110307	13.0896		-4.69869
20170324	21.07	9.08706	5.41034	1.3158	-3.76984	-4.24711	3.41421	-4.76835	1.39559	0.113564	-0.111941	13.0915		15.8132
20170325	7.19	-3.20231	2.79333	1.08198	-3.48438	-3.99237	3.57798	-4.61612	1.42223	0.115259	-0.113571	13.0934		0.672991
20170326	0	-2.96647	-4.9344	0.718574	-3.02519	-3.66877	3.74235	-4.46345	1.44858	0.116889	-0.115196	13.0953		-7.1823
20170327	0.59	2.03499	-10.4908	0.413675	-2.41982	-3.28271	3.90694	-4.31041	1.47463	0.118453	-0.116816	13.0972		-8.04215
20170328	0	-4.52476	-5.49493	0.23405	-1.67254	-2.8432	4.07138	-4.15706	1.50038	0.119951	-0.118433	13.0991		-9.78564
20170329	1.47	-18.6129	8.48216	-0.0841768	-0.786805	-2.35971	4.23526	-4.00348	1.52583	0.121383	-0.120044	13.101		-10.215
20170330	51.13	21.2615	17.437	-0.88	0.218998	-1.84173	4.39822	-3.84974	1.55097	0.122751	-0.121652	13.1028		37.8185
20170331	0.1	-22.2663	9.32279	-2.26967	1.3016	-1.29819	4.55987	-3.69589	1.57581	0.124053	-0.123255	13.1047		-15.2132
20170401	0.03	-10.5029	-3.32377	-3.64904	2.39203	-0.73725	4.71984	-3.54202	1.60034	0.125291	-0.124854	13.1066		-17.4757
20170402	0	-5.44553	-9.79464	-4.30374	3.41809	-0.16666	4.87774	-3.38818	1.62455	0.126464	-0.126448	13.1085		-19.5439
20170403	5.18	-1.17446	-11.2033	-3.75721	4.3137	0.405862	5.0332	-3.23445	1.64845	0.127573	-0.128038	13.1103		-16.135
20170404	19.74	11.9539	-12.2261	-1.79853	5.0189	0.972309	5.18583	-3.0809	1.67203	0.128618	-0.129624	13.1122		-2.07071
20170405	43.1	30.2145	-12.9814	1.54858	5.46641	1.52431	5.33523	-2.9276	1.69529	0.129599	-0.131205	13.114		18.7817
20170406	1.1	-19.4643	-9.88167	5.4918	5.58934	2.0532	5.48098	-2.77462	1.71822	0.130516	-0.132782	13.1159		-23.8541
20170407	0.04	-33.809	-0.60713	8.75139	5.32657	2.55062	5.62264	-2.62202	1.74082	0.13137	-0.134355	13.1177		-25.6647
20170408	46.75	-2.34247	13.312	10.3556	4.62674	3.00906	5.75978	-2.4699	1.76309	0.132161	-0.135923	13.1196		21.3251
20170409	86.75	30.473	21.3113	9.69697	3.47616	3.42351	5.89198	-2.3183	1.78504	0.132889	-0.137487	13.1214		61.4813
20170410	33.34	-11.7476	14.4152	6.48471	1.95382	3.79155	6.01881	-2.16732	1.80664	0.133555	-0.139046	13.1233		9.15222
20170411	3.2	-20.6585	-1.16242	1.68164	0.197436	4.11168	6.13985	-2.01703	1.8279	0.134158	-0.140602	13.1251		-20.1393
20170412	4.41	0.336471	-15.0253	-3.36997	-1.64435	4.38278	6.25469	-1.8675	1.84883	0.134699	-0.142153	13.127		-18.0588
20170413	0	4.74221	-18.4964	-7.28956	-3.42202	4.60389	6.36299	-1.71882	1.86941	0.135178	-0.143699	13.1288		-21.0438
20170414	1.38	1.74135	-11.156	-9.04793	-4.98933	4.77403	6.46442	-1.57107	1.88964	0.135595	-0.145241	13.1306		-18.4626
20170415	0.04	-12.5667	3.69735	-8.92696	-6.22572	4.8924	6.55873	-1.42433	1.90952	0.135951	-0.146779	13.1325		-17.7963
20170416	42.16	17.1954	14.051	-7.44506	-7.05346	4.95805	6.64565	-1.27869	1.92904	0.136246	-0.148313	13.1343		23.8013
20170417	3.17	-19.0665	9.79433	-5.02067	-7.44251	4.96955	6.72502	-1.13422	1.94821	0.136479	-0.149842	13.1361		-14.2928
20170418	0	-17.4014	1.02634	-1.92612	-7.41394	4.92661	6.79682	-0.991011	1.96702	0.136652	-0.151367	13.1379		-18.3012
20170419	0.04	-19.4133	-0.736585	1.40087	-7.00837	4.83067	6.86117	-0.849161	1.98547	0.136765	-0.152888	13.1397		-18.749
20170420	53.82	30.5745	-0.848962	4.4274	-6.27825	4.68466	6.9183	-0.708756	2.00355	0.136817	-0.154404	13.1416		34.153
20170421	11.68	-10.2749	-5.48971	6.64114	-5.27239	4.49201	6.9685	-0.569886	2.02127	0.136809	-0.155916	13.1434		-9.12347
20170422	0	-19.6764	-9.6144	7.60378	-4.03685	4.25608	7.01208	-0.432648	2.03861	0.136741	-0.157424	13.1452		-21.687
20170423	0	-24.644	-5.88806	7.23065	-2.62357	3.98037	7.04934	-0.297136	2.05559	0.136613	-0.158927	13.147		-23.3014
20170424	17.84	-17.8453	5.24077	5.69491	-1.08801	3.66812	7.08064	-0.163444	2.07218	0.136427	-0.160426	13.1488		-6.90959
20170425	65.79	22.2805	13.5485	3.33797	0.518698	3.32149	7.10633	-0.0316668	2.0884	0.136181	-0.161921	13.1506		39.167
20170426	32.9	-3.67991	8.28149	0.531484	2.14654	2.94211	7.12677	0.0981009	2.10423	0.135876	-0.163411	13.1524		5.13306
20170427	25.23	4.74252	-6.52933	-2.35284	3.74578	2.53162	7.14235	0.225768	2.11968	0.135513	-0.164897	13.1542		-4.13965
20170428	0.4	-5.00705	-19.7434	-4.95997	5.26701	2.09175	7.15342	0.351247	2.13474	0.135091	-0.166379	13.156		-29.7104
20170429	0	1.31226	-25.8819	-6.92463	6.65643	1.62431	7.16037	0.474452	2.14941	0.134611	-0.167857	13.1578		-31.4943
20170430	1.16	-5.84384	-17.2036	-7.9276	7.85608	1.13145	7.16356	0.595304	2.16369	0.134073	-0.16933	13.1595		-30.9751
20170501	0.35	-29.0594	5.60031	-7.88245	8.82406	0.615723	7.16337	0.713726	2.17757	0.133478	-0.170799	13.1613		-31.3415
20170502	15.8	-40.7741	31.3079	-6.78382	9.53822	0.08062	7.16019	0.829646	2.19105	0.132825	-0.172264	13.1631		-16.2501
20170503	117.86	47.5502	42.6681	-4.64453	9.98987	-0.470172	7.15439	0.942998	2.20412	0.132114	-0.173725	13.1649		85.5737
20170504	0.45	-52.7114	21.3381	-1.57679	10.1884	-1.03283	7.14634	1.05372	2.2168	0.131347	-0.175181	13.1667		-32.95
20170505	29.59	14.0458	-19.0669	2.00957	10.16	-1.60342	7.13636	1.16175	2.22906	0.130523	-0.176633	13.1684		-3.01146
20170506	48.09	60.662	-50.1439	5.62725	9.9389	-2.17778	7.12477	1.26703	2.24092	0.129642	-0.17808	13.1702		16.1453
20170507	19.63	29.3958	-49.3101	8.82189	9.56086	-2.75145	7.11191	1.36952	2.25236	0.128706	-0.179524	13.172		-11.0924
20170508	0.06	-17.2637	-23.879	11.2296	9.0579	-3.31914	7.0981	1.46918	2.26338	0.127713	-0.180963	13.1737		-29.9131
20170509	0	-52.6312	11.6685	12.3273	8.4475	-3.87473	7.08365	1.56601	2.27399	0.126664	-0.182398	13.1755		-28.6354
20170510	14.37	-67.6736	43.0439	11.5619	7.73474	-4.41151	7.06886	1.65999	2.28417	0.12556	-0.183829	13.1772		-13.0678
20170511	154.67	65.551	54.1574	8.42922	6.92057	-4.92248	7.054	1.75112	2.29392	0.1244	-0.185255	13.179		128.138
20170512	0.03	-61.1821	33.4261	2.85698	6.00229	-5.40053	7.03933	1.8394	2.30325	0.123185	-0.186677	13.1807		-24.8991
20170513	0	-17.2022	-1.7245	-3.9902	4.97519	-5.83883	7.02509	1.92484	2.31215	0.121915	-0.188095	13.1825		-22.9169
20170514	9.89	29.0947	-30.7365	-10.6369	3.83476	-6.2305	7.01146	2.00747	2.32062	0.120591	-0.189509	13.1842		-12.2787
20170515	3.13	39.4006	-41.1091	-15.5246	2.57819	-6.56771	6.99859	2.08733	2.32864	0.119212	-0.190918	13.186		-17.233
20170516	0.49	36.339	-37.5631	-16.9368	1.21226	-6.8416	6.98658	2.16446	2.33623	0.117779	-0.192324	13.1877		-18.161
20170517	0	25.4865	-28.9399	-13.8315	-0.233018	-7.04289	6.9754	2.23892	2.34338	0.116292	-0.193725	13.1894		-17.2849
20170518	1.82	9.83825	-17.1246	-7.06619	-1.73366	-7.16253	6.96498	2.31076	2.35008	0.114751	-0.195121	13.1912		-14.3525
20170519	0.24	-15.06	-0.600155	1.55858	-3.27855	-7.19202	6.9551	2.38004	2.35633	0.113157	-0.196514	13.1929		-14.1016
20170520	5.87	-34.606	17.6744	10.1806	-4.85887	-7.12336	6.94551	2.44682	2.36213	0.11151	-0.197902	13.1946		-6.75104
20170521	88.83	30.3439	30.6656	17.0688	-6.46529	-6.94894	6.93587	2.51117	2.36748	0.109809	-0.199286	13.1963		78.0782
20170522	86.61	26.4053	29.5817	20.6571	-8.08476	-6.66194	6.92575	2.57317	2.37237	0.108056	-0.200666	13.1981		76.6441
20170523	20.76	-25.0662	16.8411	20.2051	-9.67793	-6.25815	6.91456	2.63288	2.3768	0.106251	-0.202042	13.1998		11.9801
20170524	7.56	-18.5119	1.74421	16.2568	-11.1498	-5.73591	6.9016	2.69039	2.38077	0.104392	-0.203413	13.2015		-0.510886
20170525	0.63	-8.69073	-7.63002	9.63009	-12.3782	-5.09602	6.88611	2.74577	2.38427	0.102482	-0.204781	13.2032		-6.69067
20170526	0	0.701875	-9.12022	1.17585	-13.2385	-4.34167	6.86726	2.79912	2.3873	0.10052	-0.206144	13.2049		-7.2425
20170527	0	5.04472	-4.73698	-7.90617	-13.5946	-3.4799	6.8441	2.85051	2.38987	0.0985069	-0.207503	13.2066		-7.59843
20170528	0	4.41828	1.43361	-15.8682	-13.2866	-2.52323	6.81569	2.90003	2.39196	0.0964419	-0.208857	13.2083		-10.0163
20170529	1.07	6.78232	4.58527	-20.7406	-12.1478	-1.49017	6.78107	2.94777	2.39357	0.0943259	-0.210208	13.21		-9.37299
20170530	1.93	8.77939	-0.38307	-20.8734	-10.0672	-0.404016	6.73928	2.99382	2.3947	0.0921589	-0.211554	13.2117		-12.477
20170531	0.69	11.4177	-14.2739	-15.8349	-7.14863	0.707753	6.68937	3.03826	2.39535	0.0899413	-0.212896	13.2134		-18.6911
20170601	15.47	23.6771	-24.8501	-6.67192	-3.66063	1.81685	6.63038	3.08119	2.39552	0.0876732	-0.214234	13.2151		-7.84487
20170602	0.15	-18.7572	-14.1663	4.53791	0.0882392	2.89498	6.56135	3.12269	2.39519	0.085355	-0.215568	13.2168		-28.3855
20170603	9.3	-46.868	8.93417	14.2928	3.78813	3.91386	6.48133	3.16286	2.39438	0.0829867	-0.216897	13.2185		-23.641
20170604	131.22	49.7255	25.66	18.7587	7.12904	4.84519	6.38935	3.20179	2.39307	0.0805688	-0.218222	13.2202		94.1442
20170605	50.94	-20.5387	15.1892	15.4022	9.81977	5.6607	6.28448	3.23957	2.39126	0.0781014	-0.219544	13.2218		10.0527
20170606	0.03	-41.3341	-7.53205	6.82479	11.675	6.33232	6.16577	3.27629	2.38896	0.0755847	-0.220861	13.2235		-42.0413
20170607	0	-22.6848	-18.9692	-3.16289	12.627	6.83379	6.03232	3.31204	2.38615	0.0730189	-0.222174	13.2252		-44.8169
20170608	1.53	-23.4581	-8.06949	-11.0484	12.626	7.14563	5.88333	3.34691	2.38284	0.0704044	-0.223482	13.2268		-42.576
20170609	57.47	20.7787	8.3212	-14.4924	11.6206	7.26147	5.71824	3.38101	2.37902	0.0677414	-0.224787	13.2285		14.6076
20170610	24.79	-16.4798	11.6598	-11.9394	9.61749	7.19187	5.53694	3.41441	2.37468	0.06503	-0.226087	13.2302		-16.7595
20170611	29.32	-4.72304	-0.721895	-3.81943	6.77854	6.95387	5.3396	3.4472	2.36984	0.0622705	-0.227383	13.2318		-9.26437
20170612	45.29	18.7939	-13.1478	5.7147	3.48099	6.5652	5.12651	3.47946	2.36447	0.0594632	-0.228675	13.2335		11.3608
20170613	12.63	-22.1023	-7.4389	12.0138	0.1489	6.04352	4.89801	3.51127	2.35859	0.0566082	-0.229963	13.2352		-17.5275
20170614	74.06	23.9644	10.0938	13.7016	-2.82267	5.40668	4.6545	3.54271	2.35218	0.0537059	-0.231247	13.2368		47.7598
20170615	80.25	26.5255	19.9858	10.7013	-5.17241	4.67317	4.39639	3.57384	2.34525	0.0507565	-0.232527	13.2385		57.2125
20170616	4.08	-30.8243	11.0169	3.83751	-6.84291	3.86229	4.1242	3.60474	2.33779	0.0477601	-0.233802	13.2401		-15.9699
20170617	0.53	-7.11243	-5.89133	-4.556	-7.83801	2.99479	3.83845	3.63547	2.32979	0.044717	-0.235073	13.2417		-17.5598
20170618	2.69	17.2762	-19.6146	-11.8286	-8.16749	2.09359	3.53972	3.6661	2.32127	0.0416275	-0.236341	13.2434		-14.1669
20170619	5.75	32.683	-26.2621	-15.4711	-7.84304	1.18432	3.2286	3.69667	2.3122	0.0384918	-0.237604	13.245		-9.05023
20170620	0.48	23.5725	-24.6344	-13.7118	-6.91054	0.295452	2.90568	3.72726	2.3026	0.0353101	-0.238863	13.2467		-14.7737
20170621	0.02	5.63682	-14.8043	-7.30024	-5.55155	-0.543344	2.57155	3.75791	2.29245	0.0320827	-0.240118	13.2483		-16.4677
20170622	6.56	-15.0276	4.24305	1.46119	-3.99761	-1.30202	2.22677	3.78868	2.28176	0.0288098	-0.241368	13.2499		-9.32332
20170623	8.34	-44.9676	26.9925	9.87672	-2.48433	-1.95181	1.87195	3.81962	2.27052	0.0254916	-0.242615	13.2515		-8.0984
20170624	111.01	44.2504	34.708	15.2894	-1.24489	-2.46599	1.50765	3.85079	2.25873	0.0221284	-0.243857	13.2532		94.2478
20170625	7.37	-40.0218	14.58	15.8602	-0.47798	-2.82109	1.13449	3.88223	2.24638	0.0187204	-0.245096	13.2548		-9.58151
20170626	5.52	-13.4058	-10.2566	12.4208	-0.230094	-3.00303	0.753137	3.914	2.23348	0.0152678	-0.24633	13.2564		-11.2416
20170627	0.61	-2.53754	-19.8302	6.39679	-0.39474	-3.01404	0.364335	3.94614	2.22002	0.0117708	-0.24756	13.258		-15.9709
20170628	0.88	-1.50158	-12.7912	-0.774283	-0.823047	-2.87164	-0.0309221	3.97871	2.20599	0.00822981	-0.248786	13.2596		-15.0671
20170629	12.54	5.36249	-1.30849	-7.37215	-1.3543	-2.59969	-0.431501	4.01175	2.1914	0.00464493	-0.250008	13.2612		-3.31814
20170630	13.68	6.17286	4.99008	-11.6	-1.80723	-2.22354	-0.836197	4.04533	2.17625	0.00101642	-0.251226	13.2628		-0.437036
20170701	2.93	-2.04313	3.59038	-12.3087	-2.00083	-1.769	-1.24373	4.07948	2.16052	-0.00265549	-0.25244	13.2644		-10.7614
20170702	0.46	-0.0990213	-4.0746	-9.53425	-1.83645	-1.26167	-1.6528	4.11425	2.14422	-0.00637055	-0.253649	13.266		-13.7079
20170703	6.99	8.91393	-13.4793	-4.38814	-1.33272	-0.726938	-2.06206	4.14969	2.12734	-0.0101285	-0.254855	13.2676		-8.95355
20170704	9.08	7.31247	-16.0011	1.46955	-0.54979	-0.187826	-2.47015	4.18584	2.10989	-0.0139292	-0.256056	13.2692		-7.21905
20170705	0.86	-18.1614	-5.70013	6.49102	0.440319	0.335711	-2.87568	4.22276	2.09185	-0.0177723	-0.257254	13.2708		-17.3705
20170706	54.11	14.1425	12.0441	9.64797	1.56449	0.825766	-3.27729	4.2605	2.07323	-0.0216577	-0.258447	13.2724		35.8346
20170707	71.17	19.3509	21.4148	10.0595	2.74675	1.26592	-3.67361	4.2991	2.05402	-0.025585	-0.259636	13.274		50.8251
20170708	25.67	-16.5548	13.0481	7.28657	3.90156	1.64037	-4.06334	4.3386	2.03423	-0.0295541	-0.260821	13.2756		3.77988
20170709	35.55	12.5394	-1.13432	2.56747	4.94279	1.93374	-4.44522	4.37906	2.01384	-0.0335647	-0.262003	13.2771		13.9725
20170710	0	-7.59245	-12.3332	-2.44779	5.79245	2.13271	-4.81804	4.42052	1.99285	-0.0376166	-0.26318	13.2787		-22.3735
20170711	0.02	5.23251	-21.9218	-6.11892	6.36959	2.22727	-5.18063	4.46303	1.97127	-0.0417095	-0.264353	13.2803		-22.8083
20170712	0.08	4.55353	-20.0408	-7.16548	6.59425	2.2108	-5.53191	4.50662	1.94909	-0.0458432	-0.265522	13.2819		-22.6527
20170713	0.05	-13.4023	-3.37615	-5.74189	6.41912	2.08247	-5.87083	4.55135	1.92631	-0.0500175	-0.266686	13.2834		-22.5203
20170714	49.5	14.7342	16.3425	-2.90219	5.85916	1.849	-6.19645	4.59725	1.90293	-0.0542322	-0.267847	13.285		28.1745
20170715	24.09	-14.0217	17.521	0.160868	4.95263	1.52334	-6.50799	4.64438	1.87893	-0.058487	-0.269004	13.2865		3.66012
20170716	29.41	4.7719	4.75988	2.43294	3.74841	1.12085	-6.80468	4.69276	1.85434	-0.0627816	-0.270157	13.2881		11.9647
20170717	21.46	8.28843	-5.5255	3.36233	2.312	0.657684	-7.0858	4.74244	1.82913	-0.0671159	-0.271305	13.2897		6.12526
20170718	1.29	-7.86721	-6.87375	2.68957	0.731372	0.15062	-7.35068	4.79346	1.80332	-0.0714895	-0.27245	13.2912		-12.0514
20170719	13.88	5.92388	-3.49123	0.976551	-0.906511	-0.383369	-7.59869	4.84585	1.7769	-0.0759024	-0.27359	13.2928		3.4092
20170720	2.86	-3.01384	-2.02234	-0.643861	-2.52308	-0.927203	-7.82924	4.89966	1.74988	-0.0803542	-0.274727	13.2943		-5.68005
20170721	0.9	-1.86958	-2.38109	-1.4779	-4.05229	-1.46373	-8.04177	4.95492	1.72225	-0.0848447	-0.275859	13.2958		-5.72857
20170722	0.09	0.274298	-2.26913	-1.45937	-5.44292	-1.97596	-8.23573	5.01166	1.69402	-0.0893736	-0.276988	13.2974		-3.4542
20170723	0.06	0.248341	-1.30828	-0.8146	-6.64459	-2.44716	-8.41058	5.06991	1.66519	-0.0939408	-0.278112	13.2989		-1.87454
20170724	0.12	-0.563312	-0.276445	0.150419	-7.60902	-2.86094	-8.56579	5.12968	1.63576	-0.098546	-0.279233	13.3005		-0.689337
20170725	0.86	1.74483	0.102283	1.16319	-8.30161	-3.2024	-8.70081	5.19101	1.60574	-0.103189	-0.280349	13.302		3.0103
20170726	0.12	-0.146057	-0.357606	2.04527	-8.69112	-3.45995	-8.81502	5.25388	1.57513	-0.107869	-0.281462	13.3035		1.54161
20170727	0	-1.33427	-0.331029	2.56873	-8.73431	-3.62821	-8.90788	5.31831	1.54394	-0.112587	-0.28257	13.305		0.90343
20170728	2.36	-0.639571	1.40943	2.42713	-8.37547	-3.71237	-8.97897	5.38426	1.51217	-0.117342	-0.283674	13.3066		3.19699
20170729	5.6	1.03318	3.6949	1.3952	-7.56343	-3.72378	-9.02786	5.45172	1.47983	-0.122134	-0.284775	13.3081		6.12328
20170730	6.14	1.56569	4.57632	-0.627983	-6.26786	-3.67548	-9.0542	5.52065	1.44692	-0.126962	-0.285871	13.3096		5.51403
20170731	1.41	-3.00111	4.22427	-3.38492	-4.50473	-3.58002	-9.05774	5.591	1.41346	-0.131826	-0.286963	13.3111		-2.16176
20170801	3.29	1.24937	3.72092	-6.23062	-2.33221	-3.4487	-9.03831	5.66273	1.37946	-0.136727	-0.288052	13.3126		-1.26033
20170802	0.84	-0.175373	1.03388	-8.08605	0.166565	-3.29109	-8.99579	5.73576	1.34491	-0.141664	-0.289136	13.3141		-7.22754
20170803	4.55	6.90053	-5.13897	-8.05783	2.87791	-3.1152	-8.9301	5.81002	1.30983	-0.146636	-0.290216	13.3156		-6.29627
20170804	14.08	16.4954	-11.0323	-5.80937	5.63605	-2.92869	-8.84123	5.88542	1.27424	-0.151643	-0.291293	13.3171		-0.346233
20170805	9	4.51516	-10.6635	-1.53227	8.21614	-2.73918	-8.72916	5.96185	1.23814	-0.156686	-0.292365	13.3186		-7.6806
20170806	0.94	-19.1656	-3.27662	3.66735	10.3669	-2.55425	-8.59394	6.03922	1.20153	-0.161764	-0.293433	13.3201		-18.7749
20170807	0.74	-36.8332	8.14704	8.25788	11.8328	-2.38152	-8.43564	6.1174	1.16444	-0.166877	-0.294498	13.3216		-20.4282
20170808	85.39	38.8413	14.3278	10.5603	12.3594	-2.22844	-8.25438	6.19627	1.12687	-0.172024	-0.295558	13.3231		63.7294
20170809	0.98	-36.6922	6.31368	9.46433	11.761	-2.10042	-8.05035	6.27571	1.08882	-0.177205	-0.296615	13.3246		-20.9142
20170810	0	-22.0332	-4.75802	5.89304	10.1333	-1.9977	-7.82385	6.35559	1.05033	-0.18242	-0.297667	13.3261		-20.8981
20170811	33.14	23.3422	-10.1077	1.20911	7.70355	-1.91785	-7.57534	6.43577	1.01138	-0.187669	-0.298716	13.3276		14.4436
20170812	12.76	6.77971	-6.13798	-3.26305	4.71729	-1.85838	-7.30546	6.51612	0.972002	-0.192951	-0.29976	13.329		-2.62132
20170813	3.27	-3.42067	-0.369239	-6.35335	1.42068	-1.81692	-7.01498	6.59649	0.932197	-0.198267	-0.300801	13.3305		-10.1433
20170814	2.82	-0.589871	1.60705	-7.42185	-1.94787	-1.79107	-6.70469	6.67674	0.891977	-0.203616	-0.301837	13.332		-6.40467
20170815	0.81	-2.12653	2.04805	-6.82314	-5.16369	-1.77835	-6.37549	6.75673	0.851356	-0.208998	-0.30287	13.3335		-6.90161
20170816	3.09	1.78023	2.58267	-5.38515	-8.01536	-1.77624	-6.02827	6.83633	0.810342	-0.214412	-0.303899	13.3349		-1.02225
20170817	0.25	-0.999024	2.16601	-3.82913	-10.3226	-1.78224	-5.66394	6.9154	0.768949	-0.219859	-0.304924	13.3364		-2.66213
20170818	0.01	-0.283255	1.23578	-2.55729	-11.981	-1.7938	-5.28345	6.9938	0.727186	-0.225338	-0.305944	13.3378		-1.60477
20170819	0.05	1.40502	-0.129525	-1.50259	-12.9721	-1.80792	-4.88783	7.07138	0.685066	-0.230848	-0.306961	13.3393		-0.227101
20170820	0.61	1.60914	-2.22063	-0.330501	-13.3383	-1.82144	-4.47815	7.14802	0.6426	-0.236391	-0.307974	13.3408		-0.941988
20170821	0.03	1.39316	-3.81942	1.23142	-13.1202	-1.83237	-4.05553	7.22358	0.599798	-0.241965	-0.308983	13.3422		-1.19483
20170822	0	-3.55721	-2.30308	3.14768	-12.3158	-1.84076	-3.62121	7.29792	0.556672	-0.24757	-0.309988	13.3437		-2.71261
20170823	1.67	-10.0448	2.79448	4.77387	-10.9106	-1.84675	-3.17651	7.3709	0.513233	-0.253206	-0.310989	13.3451		-2.47648
20170824	25	5.22173	7.82176	4.91173	-8.8991	-1.84981	-2.72276	7.44239	0.469493	-0.258872	-0.311986	13.3465		17.9552
20170825	30.71	10.4596	7.26303	2.50876	-6.31602	-1.84891	-2.26134	7.51224	0.425463	-0.264569	-0.31298	13.348		20.2314
20170826	3.92	-7.52166	-1.24427	-2.12182	-3.28739	-1.84292	-1.7936	7.58032	0.381154	-0.270297	-0.313969	13.3494		-10.8878
20170827	0.15	-0.784677	-9.71854	-6.92151	0.0258805	-1.83062	-1.3209	7.64649	0.336577	-0.276054	-0.314954	13.3508		-17.4247
20170828	1.71	1.2402	-11.2864	-9.33541	3.46313	-1.81076	-0.844593	7.71062	0.291745	-0.281841	-0.315936	13.3523		-19.3816
20170829	15.65	7.22482	-10.8539	-6.98798	6.85616	-1.78209	-0.366005	7.77257	0.246668	-0.287658	-0.316913	13.3537		-10.617
20170830	9.89	-2.63667	-17.3549	0.396658	9.9918	-1.7434	0.113546	7.83219	0.201357	-0.293504	-0.317887	13.3551		-19.5949
20170831	39.37	16.6447	-18.299	8.99666	12.65	-1.69346	0.592741	7.88935	0.155825	-0.299379	-0.318857	13.3566		7.34242
20170901	29.85	-34.7405	14.7493	14.8354	14.622	-1.63109	1.07026	7.94392	0.110081	-0.305283	-0.319823	13.358		-5.15585
20170902	141.85	44.818	45.1555	15.7683	15.7182	-1.55518	1.54482	7.99575	0.0641385	-0.311216	-0.320785	13.3594		105.742
20170903	20.68	-50.7919	23.1941	10.8964	15.8304	-1.46457	2.01515	8.04472	0.0180077	-0.317177	-0.321743	13.3608		-16.7014
20170904	5.44	-8.75808	-25.5458	2.56141	15.0421	-1.35804	2.48	8.09067	-0.0282999	-0.323166	-0.322697	13.3622		-31.7424
20170905	14.91	46.3526	-60.9109	-6.09723	13.4963	-1.23459	2.9381	8.13347	-0.0747728	-0.329183	-0.323647	13.3636		-20.6556
20170906	9.75	43.1898	-55.4537	-12.396	11.3455	-1.0939	3.38819	8.173	-0.1214	-0.335228	-0.324593	13.365		-24.6599
20170907	0.12	-1.0988	-15.5504	-15.6645	8.75194	-0.936084	3.82907	8.2091	-0.16817	-0.3413	-0.325536	13.3664		-32.3137
20170908	0.19	-46.6981	33.7043	-16.4638	5.88024	-0.761368	4.25959	8.24164	-0.215071	-0.347399	-0.326474	13.3678		-29.4576
20170909	94.4	16.2351	66.284	-15.4942	2.88407	-0.570007	4.67861	8.27048	-0.262092	-0.353526	-0.327409	13.3692		67.0248
20170910	122.75	44.0028	66.6368	-13.3609	-0.11072	-0.362328	5.085	8.29549	-0.309222	-0.359679	-0.32834	13.3706		97.2786
20170911	0.6	-42.324	30.5292	-10.4365	-3.00878	-0.138747	5.47769	8.31652	-0.35645	-0.365858	-0.329267	13.372		-22.2314
20170912	0	-0.306793	-13.9926	-6.97011	-5.73328	0.100233	5.85562	8.33345	-0.403764	-0.372064	-0.33019	13.3734		-21.2695
20170913	0	28.6969	-44.3268	-3.16123	-8.2127	0.354111	6.21779	8.34613	-0.451153	-0.378296	-0.331109	13.3748		-18.7911
20170914	0.05	33.9463	-52.5643	0.964091	-10.3757	0.62257	6.5632	8.35443	-0.498605	-0.384554	-0.332025	13.3761		-17.6539
20170915	0.16	19.4359	-41.188	5.48516	-12.1588	0.905137	6.8909	8.35821	-0.54611	-0.390837	-0.332936	13.3775		-16.2669
20170916	0.05	-8.14577	-16.9027	9.92774	-13.5213	1.20105	7.19992	8.35734	-0.593657	-0.397145	-0.333844	13.3789		-15.1207
20170917	3.76	-35.9053	10.5036	13.5479	-14.4369	1.50933	7.48929	8.35168	-0.641234	-0.403479	-0.334747	13.3803		-11.8537
20170918	78.95	20.4449	28.6817	15.5413	-14.8857	1.82877	7.75811	8.3411	-0.68883	-0.409837	-0.335647	13.3816		64.6679
20170919	94.76	33.8426	30.0884	15.1873	-14.8652	2.15814	8.00547	8.32548	-0.736435	-0.416221	-0.336543	13.383		79.1183
20170920	13.3	-30.876	14.8413	12.2964	-14.4166	2.49634	8.23051	8.30467	-0.784038	-0.422628	-0.337436	13.3844		-3.73829
20170921	3.08	-20.6645	-1.64263	7.47409	-13.5928	2.84196	8.43238	8.27857	-0.831627	-0.42906	-0.338324	13.3857		-14.833
20170922	1.74	-9.67835	-10.0042	1.53626	-12.4456	3.19252	8.61019	8.24707	-0.879193	-0.435515	-0.339208	13.3871		-18.1463
20170923	11.44	5.71309	-10.8663	-4.59865	-11.0277	3.54424	8.76312	8.21006	-0.926724	-0.441994	-0.340089	13.3884		-9.75189
20170924	22.34	15.7697	-6.60449	-9.87727	-9.39129	3.89278	8.89035	8.16746	-0.974211	-0.448497	-0.340966	13.3898		-0.712096
20170925	3.02	-9.60614	-0.130194	-13.0817	-7.58937	4.2336	8.99115	8.11919	-1.02164	-0.455023	-0.341839	13.3911		-22.818
20170926	1.02	-15.1083	1.8417	-13.2762	-5.67629	4.56209	9.06484	8.06519	-1.06901	-0.461572	-0.342708	13.3925		-26.5428
20170927	26.37	11.0991	-3.83153	-10.2314	-3.70053	4.87348	9.11082	8.00542	-1.1163	-0.468144	-0.343574	13.3938		-2.96381
20170928	42.28	27.6576	-11.8948	-5.1228	-1.69724	5.16279	9.1286	7.93986	-1.1635	-0.474738	-0.344435	13.3952		10.64
20170929	29.03	9.85597	-16.0603	0.403235	0.302297	5.42495	9.11777	7.86849	-1.2106	-0.481354	-0.345293	13.3965		-5.8011
20170930	11.25	-15.6932	-13.7999	5.0761	2.26786	5.65477	9.07805	7.79133	-1.25759	-0.487993	-0.346147	13.3978		-24.417
20171001	3.24	-38.9207	-4.14198	8.32021	4.16982	5.84719	9.00928	7.70842	-1.30447	-0.494653	-0.346997	13.3992		-34.7425
20171002	18.34	-43.6207	12.7153	9.87686	5.97709	5.99724	8.91141	7.61984	-1.35122	-0.501335	-0.347843	13.4005		-21.0286
20171003	47.73	-34.5255	31.3493	9.55217	7.64926	6.09996	8.78453	7.52566	-1.39782	-0.508038	-0.348685	13.4018		6.37598
20171004	131.82	43.881	38.5381	7.19124	9.13697	6.15025	8.62888	7.42602	-1.44427	-0.514762	-0.349524	13.4031		89.6103
20171005	92.78	23.3468	23.6294	2.96951	10.4055	6.14279	8.44494	7.32102	-1.49056	-0.521507	-0.350359	13.4044		49.9458
20171006	1.13	-35.2353	-5.79309	-1.95494	11.4227	6.07221	8.23347	7.2108	-1.53668	-0.528273	-0.35119	13.4058		-42.9833
20171007	0.57	-1.46652	-35.7484	-6.17187	12.1547	5.93391	7.99552	7.09549	-1.58262	-0.535059	-0.352017	13.4071		-43.3868
20171008	0.63	13.1655	-47.8403	-8.27585	12.5697	5.72481	7.73238	6.97521	-1.62836	-0.541866	-0.352841	13.4084		-42.9507
20171009	0.39	-1.20921	-34.2785	-7.34332	12.6458	5.4444	7.4455	6.85011	-1.6739	-0.548692	-0.35366	13.4097		-42.8311
20171010	6.54	-28.4868	-3.25937	-4.19776	12.3823	5.09452	7.13641	6.7203	-1.71923	-0.555538	-0.354476	13.411		-35.9439
20171011	59.08	-9.60022	29.1777	-0.111853	11.7939	4.67944	6.8067	6.58592	-1.76433	-0.562403	-0.355288	13.4123		19.4656
20171012	113.85	27.277	43.7025	3.63358	10.9008	4.20499	6.45799	6.4471	-1.8092	-0.569288	-0.356097	13.4136		74.6131
20171013	52.98	-17.1843	27.8988	5.976	9.72557	3.67802	6.09194	6.30398	-1.85383	-0.576191	-0.356901	13.4149		16.6905
20171014	35.21	-4.88886	-0.226555	6.73529	8.30192	3.10619	5.71018	6.15668	-1.89821	-0.583114	-0.357702	13.4162		1.61988
20171015	2.03	-16.7581	-17.9609	5.98412	6.67956	2.49761	5.31437	6.00534	-1.94233	-0.590055	-0.358499	13.4175		-28.7349
20171016	1.06	-8.99905	-22.424	3.92615	4.91924	1.86045	4.90614	5.85009	-1.98617	-0.597014	-0.359292	13.4188		-27.4969
20171017	21.91	14.3085	-19.3885	1.28279	3.09394	1.20287	4.48715	5.69105	-2.02973	-0.603991	-0.360082	13.42		-3.79714
20171018	19.46	13.1281	-14.3143	-0.928631	1.28613	0.532991	4.05903	5.52837	-2.07301	-0.610986	-0.360867	13.4213		-2.11476
20171019	0.85	-6.73735	-9.00375	-1.96656	-0.430739	-0.141071	3.62344	5.36217	-2.11598	-0.617999	-0.361649	13.4226		-17.7077
20171020	0.06	-10.6002	-2.84242	-2.03211	-2.01922	-0.811056	3.18202	5.19258	-2.15864	-0.625029	-0.362427	13.4239		-15.4748
20171021	5.72	-11.318	5.43412	-1.63577	-3.45323	-1.46852	2.73641	5.01974	-2.20098	-0.632076	-0.363202	13.4251		-7.51967
20171022	32.63	12.4438	10.3767	-1.22656	-4.70755	-2.10488	2.28826	4.84377	-2.243	-0.63914	-0.363973	13.4264		21.594
20171023	7.1	-7.06476	7.60899	-1.11749	-5.75878	-2.71138	1.8392	4.66482	-2.28467	-0.646221	-0.364739	13.4277		-0.573256
20171024	0.33	-5.78856	2.03506	-1.20965	-6.58942	-3.27946	1.39089	4.48301	-2.32599	-0.653318	-0.365503	13.4289		-4.96314
20171025	2.46	1.02534	-1.16297	-1.29333	-7.19063	-3.80067	0.944958	4.29847	-2.36696	-0.660431	-0.366262	13.4302		-1.43096
20171026	2.53	1.89068	-1.26035	-1.2156	-7.56435	-4.26696	0.503036	4.11134	-2.40756	-0.66756	-0.367018	13.4314		-0.585267
20171027	0.02	0.188979	-0.390594	-0.86622	-7.7232	-4.6712	0.0667573	3.92174	-2.44778	-0.674705	-0.36777	13.4327		-1.06783
20171028	0	-0.340812	0.162553	-0.318455	-7.6794	-5.00797	-0.362276	3.72982	-2.48762	-0.681865	-0.368518	13.4339		-0.496714
20171029	1.44	0.445401	0.440179	0.231339	-7.43817	-5.27348	-0.782535	3.53569	-2.52706	-0.689041	-0.369262	13.4352		1.11692
20171030	0.7	-0.0865464	0.303721	0.598211	-6.9955	-5.46605	-1.19259	3.3395	-2.56609	-0.696231	-0.370003	13.4364		0.815385
20171031	0	-0.139875	0.0134748	0.625074	-6.34951	-5.58613	-1.59108	3.14137	-2.60471	-0.703437	-0.37074	13.4377		0.498674
20171101	0.02	-0.28534	0.104801	0.235182	-5.51065	-5.63579	-1.97674	2.94144	-2.64291	-0.710657	-0.371474	13.4389		0.0546438
20171102	0	0.434277	0.635451	-0.502126	-4.50577	-5.61811	-2.34841	2.73983	-2.68067	-0.717891	-0.372203	13.4402		0.567601
20171103	0	-0.0852021	1.12584	-1.37744	-3.37475	-5.53724	-2.70503	2.53669	-2.71799	-0.725139	-0.372929	13.4414		-0.336795
20171104	0	0.0575099	1.201	-2.07064	-2.16608	-5.39804	-3.04567	2.33214	-2.75485	-0.732401	-0.373651	13.4426		-0.812125
20171105	0	0.316147	0.34599	-2.24997	-0.933043	-5.20528	-3.36954	2.12631	-2.79126	-0.739677	-0.37437	13.4438		-1.58784
20171106	0	0.518648	-1.79617	-1.73532	0.270415	-4.96364	-3.67597	1.91934	-2.82719	-0.746966	-0.375085	13.4451		-3.01285
20171107	0	1.32192	-4.25038	-0.584947	1.38824	-4.67762	-3.96439	1.71136	-2.86264	-0.754268	-0.375796	13.4463		-3.51341
20171108	0	-0.485143	-4.20168	0.902846	2.3601	-4.35143	-4.23435	1.50249	-2.8976	-0.761583	-0.376503	13.4475		-3.78397
20171109	0	-7.65216	0.300189	2.28986	3.12558	-3.98906	-4.48542	1.29286	-2.93206	-0.768911	-0.377207	13.4487		-5.06211
20171110	19.4	3.98707	6.04949	3.11679	3.62813	-3.59459	-4.71723	1.0826	-2.96601	-0.776251	-0.377907	13.4499		13.1533
20171111	25.62	9.36148	7.0578	2.98408	3.82869	-3.17295	-4.92944	0.871836	-2.99945	-0.783603	-0.378603	13.4511		19.4034
20171112	0.05	-8.71684	1.19726	1.8561	3.73168	-2.72988	-5.12172	0.660694	-3.03235	-0.790967	-0.379296	13.4523		-5.66349
20171113	1.35	-0.339964	-4.78241	0.285105	3.38446	-2.27121	-5.2938	0.449297	-3.06472	-0.798343	-0.379984	13.4535		-4.83726
20171114	0.29	2.69402	-5.97095	-1.07995	2.84804	-1.80336	-5.4455	0.237772	-3.09654	-0.805731	-0.38067	13.4547		-4.35688
20171115	0	0.0963171	-3.36189	-1.80163	2.18543	-1.33319	-5.57673	0.026242	-3.12781	-0.813129	-0.381351	13.4559		-5.06721
20171116	0.43	-2.11005	0.421686	-1.84718	1.46024	-0.867834	-5.68745	-0.185165	-3.15851	-0.820539	-0.382029	13.4571		-3.53553
20171117	6.65	1.02358	3.30066	-1.42866	0.735409	-0.414405	-5.77765	-0.396323	-3.18864	-0.82796	-0.382703	13.4583		2.89557
20171118	6.54	1.04466	3.76836	-0.768883	0.0726719	0.0200759	-5.84739	-0.607106	-3.21818	-0.835391	-0.383374	13.4595		4.04413
20171119	3.74	-1.2756	1.86656	-0.137491	-0.470651	0.428766	-5.89672	-0.817389	-3.24713	-0.842832	-0.384041	13.4607		0.453467
20171120	1.63	-0.0251402	-0.480341	0.193395	-0.851609	0.804997	-5.92572	-1.02704	-3.27548	-0.850284	-0.384704	13.4619		-0.312087
20171121	0.47	0.0938557	-1.28301	0.0599334	-1.05131	1.1428	-5.93451	-1.23595	-3.30321	-0.857745	-0.385364	13.4631		-1.12922
20171122	0.45	-1.15414	-0.270872	-0.473843	-1.0746	1.43754	-5.92321	-1.44396	-3.33033	-0.865216	-0.386019	13.4642		-1.89885
20171123	4.3	2.0228	0.950963	-1.09452	-0.947183	1.68625	-5.89203	-1.65096	-3.35681	-0.872696	-0.386672	13.4654		1.87924
20171124	0.05	-0.878657	0.359797	-1.4245	-0.706389	1.88771	-5.84126	-1.8568	-3.38266	-0.880185	-0.38732	13.4666		-1.94336
20171125	0	-0.0584968	-1.62973	-1.24573	-0.394357	2.04223	-5.77122	-2.06135	-3.40785	-0.887684	-0.387965	13.4678		-2.93395
20171126	0	0.983574	-3.13164	-0.515431	-0.0531018	2.15076	-5.68237	-2.26447	-3.43239	-0.895191	-0.388607	13.4689		-2.66349
20171127	0.27	-0.931896	-2.17492	0.638493	0.277212	2.21505	-5.57528	-2.466	-3.45626	-0.902706	-0.389244	13.4701		-2.46832
20171128	1.53	-4.75769	1.45709	1.84291	0.561503	2.2373	-5.4507	-2.6658	-3.47945	-0.91023	-0.389878	13.4712		-1.4577
20171129	16.78	6.51956	4.43201	2.60028	0.76672	2.21985	-5.30943	-2.86374	-3.50195	-0.917761	-0.390509	13.4724		13.5519
20171130	4.79	-3.07277	2.83072	2.53478	0.867515	2.16549	-5.15241	-3.05965	-3.52375	-0.925301	-0.391135	13.4735		2.29274
20171201	1.12	-2.60198	-0.94583	1.76658	0.858382	2.07769	-4.98064	-3.2534	-3.54484	-0.932848	-0.391758	13.4747		-1.78123
20171202	0.08	0.187246	-2.9232	0.613809	0.75864	1.96021	-4.79521	-3.44484	-3.56521	-0.940402	-0.392378	13.4758		-2.12214
20171203	0.04	-0.292303	-2.45026	-0.557458	0.596325	1.81731	-4.59722	-3.63383	-3.58484	-0.947963	-0.392994	13.477		-3.30002
20171204	0.06	0.525713	-1.24727	-1.41744	0.402122	1.65353	-4.38781	-3.82024	-3.60374	-0.955531	-0.393606	13.4781		-2.139
20171205	0.08	0.225032	-0.27873	-1.78767	0.205482	1.47325	-4.16819	-4.00394	-3.62189	-0.963106	-0.394215	13.4793		-1.84137
20171206	0.04	-0.520741	0.592556	-1.67288	0.0300774	1.28067	-3.93955	-4.18479	-3.63927	-0.970687	-0.39482	13.4804		-1.60106
20171207	0.85	0.215188	1.15079	-1.24137	-0.107885	1.08011	-3.7031	-4.36266	-3.65588	-0.978274	-0.395421	13.4815		0.124608
20171208	2.03	1.10779	1.04171	-0.738734	-0.197512	0.875901	-3.46009	-4.53741	-3.67171	-0.985867	-0.396019	13.4827		1.41076
20171209	0	-0.712772	0.658841	-0.355728	-0.234114	0.67254	-3.21181	-4.70892	-3.68675	-0.993466	-0.396613	13.4838		-0.40966
20171210	0	-0.794336	0.398839	-0.14106	-0.222695	0.474552	-2.95952	-4.87707	-3.70098	-1.00107	-0.397204	13.4849		-0.536557
20171211	0	0.433667	0.0333069	-0.0400431	-0.179725	0.286099	-2.7045	-5.04173	-3.7144	-1.00868	-0.397791	13.486		0.426931
20171212	0	-0.562008	-0.577319	0.0659555	-0.12795	0.110707	-2.448	-5.2028	-3.72699	-1.01629	-0.398374	13.4872		-1.07337
20171213	0.19	0.218631	-1.10818	0.26314	-0.0914246	-0.0483114	-2.19128	-5.36017	-3.73876	-1.02391	-0.398954	13.4883		-0.626406
20171214	0.03	0.184315	-0.689675	0.548409	-0.0901002	-0.187946	-1.93558	-5.51371	-3.74967	-1.03154	-0.39953	13.4894		0.0430492
20171215	1	-1.25501	0.642687	0.820621	-0.133535	-0.305548	-1.68212	-5.66333	-3.75973	-1.03916	-0.400103	13.4905		0.208299
20171216	5.29	3.09214	1.33906	0.960356	-0.220781	-0.398858	-1.43208	-5.80891	-3.76893	-1.04679	-0.400672	13.4916		5.39156
20171217	0.17	-1.36276	0.443045	0.859993	-0.342618	-0.466404	-1.18662	-5.95035	-3.77725	-1.05443	-0.401237	13.4927		-0.0597259
20171218	0	-0.180994	-0.602805	0.553925	-0.486911	-0.50712	-0.946854	-6.08753	-3.78469	-1.06207	-0.401799	13.4938		-0.229875
20171219	0	0.394851	-0.577198	0.165683	-0.638091	-0.520466	-0.713836	-6.22033	-3.79123	-1.06971	-0.402358	13.4949		-0.0166639
20171220	0	-0.565068	-0.155068	-0.220685	-0.776288	-0.50667	-0.488491	-6.34866	-3.79687	-1.07736	-0.402912	13.496		-0.94082
20171221	0	1.23435	-0.0231031	-0.562389	-0.878663	-0.466553	-0.271616	-6.47239	-3.80159	-1.085	-0.403463	13.4971		0.648862
20171222	0	-0.170692	0.19189	-0.837861	-0.924281	-0.401332	-0.0638832	-6.59141	-3.80538	-1.09266	-0.404011	13.4982		-0.816663
20171223	0	-0.797505	0.531432	-1.04024	-0.898214	-0.312754	0.134124	-6.70561	-3.80824	-1.10031	-0.404555	13.4992		-1.30631
20171224	0	0.700591	0.395037	-1.16218	-0.79225	-0.20346	0.321918	-6.81485	-3.81015	-1.10796	-0.405096	13.5003		-0.0665559
20171225	0	0.171355	-0.438103	-1.1835	-0.607225	-0.0767775	0.499113	-6.91902	-3.8111	-1.11562	-0.405633	13.5014		-1.45025
20171226	0	0.664377	-1.32526	-1.10771	-0.353414	0.063625	0.665365	-7.018	-3.81108	-1.12328	-0.406166	13.5025		-1.76859
20171227	0	-0.159942	-0.985683	-0.937758	-0.0483109	0.213717	0.820355	-7.11166	-3.81008	-1.13094	-0.406696	13.5036		-2.08338
20171228	0	-1.34855	0.710541	-0.67183	0.285602	0.369424	0.963764	-7.19988	-3.8081	-1.1386	-0.407222	13.5046		-1.30984
20171229	6.27	1.21661	2.19587	-0.289542	0.622452	0.526743	1.09528	-7.28256	-3.80512	-1.14627	-0.407745	13.5057		3.12293
20171230	9.78	3.84663	1.45439	0.225544	0.934798	0.681786	1.2146	-7.35957	-3.80112	-1.15393	-0.408264	13.5068		5.52656
20171231	0	-2.75856	-1.58447	0.845056	1.19583	0.830761	1.32144	-7.43081	-3.79611	-1.16159	-0.40878	13.5078		-3.49797
20180101	0	-2.80377	-3.21731	1.53255	1.38151	0.970026	1.41553	-7.49619	-3.79007	-1.16926	-0.409292	13.5089		-4.48854
20180102	0.25	-6.36173	-0.693842	2.20791	1.47437	1.09629	1.49666	-7.55563	-3.78299	-1.17692	-0.4098	13.5099		-4.84767
20180103	15.97	5.53868	2.79899	2.65272	1.46297	1.20673	1.56463	-7.60905	-3.77486	-1.18459	-0.410305	13.511		10.9904
20180104	19.54	8.14372	3.55937	2.64771	1.34243	1.29929	1.61933	-7.65639	-3.76567	-1.19225	-0.410807	13.512		14.3508
20180105	0.65	-7.54676	1.18469	2.11918	1.12078	1.373	1.66077	-7.6976	-3.75542	-1.19991	-0.411305	13.5131		-4.2429
20180106	1.07	-4.19976	-1.04434	1.1992	0.818639	1.42771	1.68904	-7.73265	-3.7441	-1.20757	-0.411799	13.5141		-4.0449
20180107	5.89	3.94904	-1.46186	0.0861481	0.465211	1.4636	1.70431	-7.76154	-3.7317	-1.21524	-0.41229	13.5152		2.57333
20180108	4.02	2.32085	-0.854048	-1.00496	0.0931547	1.48103	1.70681	-7.78426	-3.71822	-1.2229	-0.412778	13.5162		0.461838
20180109	0	-1.65371	-0.503776	-1.87957	-0.26331	1.48058	1.69685	-7.80084	-3.70365	-1.23055	-0.413262	13.5172		-4.03706
20180110	0	0.050683	-0.356733	-2.41935	-0.571107	1.46289	1.67484	-7.81128	-3.688	-1.23821	-0.413742	13.5183		-2.7254
20180111	0	-0.100674	-0.0286737	-2.58403	-0.802446	1.42875	1.64122	-7.81564	-3.67126	-1.24587	-0.414219	13.5193		-2.71338
20180112	0	0.472423	-0.000947922	-2.38751	-0.938856	1.37924	1.59646	-7.81397	-3.65345	-1.25352	-0.414693	13.5203		-1.91604
20180113	0	0.293603	-0.520986	-1.8912	-0.973553	1.31575	1.54107	-7.80633	-3.63455	-1.26117	-0.415162	13.5213		-2.11858
20180114	0	-0.69167	-0.666197	-1.22023	-0.910789	1.23989	1.47558	-7.7928	-3.61459	-1.26882	-0.415629	13.5224		-2.5781
20180115	0	-1.47091	0.205535	-0.515392	-0.764287	1.15331	1.40059	-7.77346	-3.59356	-1.27646	-0.416092	13.5234		-1.78077
20180116	7.59	3.60579	0.941095	0.113739	-0.553105	1.05755	1.3167	-7.74837	-3.57147	-1.28411	-0.416551	13.5244		4.66062
20180117	0.02	-3.18056	0.479293	0.586752	-0.301217	0.954271	1.22456	-7.71763	-3.54835	-1.29175	-0.417007	13.5254		-2.11451
20180118	5.7	2.54544	-0.289791	0.885821	-0.038329	0.845318	1.12486	-7.68131	-3.52419	-1.29938	-0.41746	13.5264		3.14146
20180119	3.53	0.252498	-0.245972	1.0497	0.204182	0.732642	1.01824	-7.63949	-3.49902	-1.30702	-0.417909	13.5274		1.05623
20180120	0.34	-4.03096	0.377411	1.11545	0.39911	0.618269	0.905394	-7.59226	-3.47284	-1.31465	-0.418354	13.5284		-2.5381
20180121	9.94	5.0818	0.408885	1.09968	0.527005	0.504188	0.786992	-7.53971	-3.44568	-1.32227	-0.418796	13.5294		6.59036
20180122	0.03	-1.74809	-0.410945	1.00631	0.576965	0.392229	0.6637	-7.48192	-3.41753	-1.32989	-0.419235	13.5304		-1.15272
20180123	0.06	-3.52869	-0.585813	0.836891	0.546377	0.283985	0.53617	-7.41899	-3.38843	-1.33751	-0.41967	13.5314		-3.27761
20180124	5.88	2.25439	0.455905	0.591322	0.441757	0.180772	0.405042	-7.351	-3.35838	-1.34512	-0.420102	13.5324		3.30162
20180125	4.58	1.43861	1.02089	0.280591	0.277882	0.0836547	0.270935	-7.27804	-3.3274	-1.35273	-0.42053	13.5334		2.74009
20180126	1.41	-0.875456	0.107526	-0.0477132	0.074045	-0.00634591	0.134445	-7.2002	-3.2955	-1.36033	-0.420955	13.5344		-0.815643
20180127	0.3	-0.753345	-0.829281	-0.339371	-0.14854	-0.0880725	-0.00384426	-7.11757	-3.2627	-1.36793	-0.421376	13.5354		-1.922
20180128	0.38	0.808657	-0.741643	-0.539725	-0.36895	-0.160376	-0.143365	-7.03025	-3.22902	-1.37552	-0.421794	13.5363		-0.472711
20180129	0.15	-0.303974	-0.186431	-0.615292	-0.568057	-0.222217	-0.283573	-6.93832	-3.19448	-1.38311	-0.422208	13.5373		-1.1057
20180130	0	0.149034	0.26132	-0.571171	-0.729282	-0.272781	-0.423929	-6.84188	-3.15907	-1.39069	-0.422619	13.5383		-0.160818
20180131	0.41	0.496671	0.222212	-0.468939	-0.837495	-0.311474	-0.563901	-6.74103	-3.12283	-1.39827	-0.423026	13.5393		0.249944
20180201	0	-0.0117179	0.0287627	-0.364715	-0.882233	-0.338107	-0.702982	-6.63586	-3.08577	-1.40583	-0.42343	13.5402		-0.34767
20180202	0.03	-0.0728112	0.132599	-0.311814	-0.859065	-0.352834	-0.840708	-6.52647	-3.0479	-1.4134	-0.423831	13.5412		-0.252027
20180203	0	-0.862079	0.5466	-0.345398	-0.770782	-0.356182	-0.976633	-6.41295	-3.00923	-1.42095	-0.424228	13.5421		-0.660878
20180204	1.46	0.854242	0.765147	-0.412698	-0.627822	-0.349099	-1.11033	-6.29541	-2.96979	-1.4285	-0.424622	13.5431		1.20669
20180205	0.02	-0.480807	0.15333	-0.398703	-0.445612	-0.3328	-1.24141	-6.17393	-2.92959	-1.43605	-0.425012	13.5441		-0.72618
20180206	0	0.196315	-1.14124	-0.196562	-0.240601	-0.308609	-1.3695	-6.04862	-2.88865	-1.44358	-0.425399	13.545		-1.14148
20180207	0	1.338	-2.18866	0.222202	-0.0282584	-0.278075	-1.49425	-5.91957	-2.84697	-1.45111	-0.425783	13.546		-0.628459
20180208	0	-0.387705	-1.5109	0.774391	0.176534	-0.243308	-1.6153	-5.78689	-2.80458	-1.45863	-0.426163	13.5469		-1.12422
20180209	0.07	-4.03386	1.3239	1.25938	0.360922	-0.206524	-1.73232	-5.65066	-2.76149	-1.46614	-0.426539	13.5478		-1.45058
20180210	12.9	5.74727	3.6825	1.41793	0.514415	-0.169808	-1.84499	-5.51099	-2.71772	-1.47364	-0.426912	13.5488		10.8477
20180211	2.64	-3.02989	2.57761	1.07346	0.629555	-0.134753	-1.95306	-5.36797	-2.67329	-1.48114	-0.427282	13.5497		0.621185
20180212	0.07	-2.29897	-0.313198	0.327346	0.706897	-0.102417	-2.05626	-5.22169	-2.6282	-1.48863	-0.427649	13.5507		-2.28482
20180213	0	0.39779	-2.14083	-0.562734	0.75332	-0.0734757	-2.15437	-5.07225	-2.58248	-1.49611	-0.428012	13.5516		-2.30577
20180214	0	0.946458	-2.25272	-1.30133	0.777459	-0.0482604	-2.24716	-4.91976	-2.53614	-1.50358	-0.428371	13.5525		-2.6076
20180215	0.19	0.0915923	-1.79247	-1.6102	0.787478	-0.0270812	-2.33441	-4.76431	-2.4892	-1.51104	-0.428727	13.5534		-3.31108
20180216	0	-0.0840267	-1.39283	-1.34958	0.790054	-0.0101126	-2.4159	-4.606	-2.44167	-1.51849	-0.42908	13.5544		-2.82644
20180217	0	-1.61938	-0.551264	-0.566231	0.78702	0.0027276	-2.49144	-4.44496	-2.39358	-1.52593	-0.429429	13.5553		-2.73687
20180218	4.91	0.623951	0.348679	0.544002	0.772712	0.011655	-2.56088	-4.28128	-2.34493	-1.53337	-0.429775	13.5562		1.51663
20180219	9.34	4.41117	0.286216	1.65951	0.737363	0.0171792	-2.62409	-4.11506	-2.29574	-1.54079	-0.430118	13.5571		6.3569
20180220	3.78	-2.00598	0.254587	2.40406	0.67113	0.0202475	-2.68097	-3.94643	-2.24603	-1.5482	-0.430457	13.558		0.652671
20180221	0.89	-6.412	1.37792	2.48644	0.565957	0.0221215	-2.73141	-3.77549	-2.19581	-1.55561	-0.430793	13.5589		-2.54764
20180222	14.82	7.09659	2.48482	1.82386	0.414728	0.0241301	-2.77534	-3.60237	-2.14511	-1.563	-0.431126	13.5598		11.4053
20180223	0	-4.81638	0.561304	0.519349	0.217503	0.027525	-2.81269	-3.42716	-2.09393	-1.57038	-0.431455	13.5607		-3.73573
20180224	0.16	-0.349382	-2.05789	-1.05693	-0.0201822	0.0332538	-2.8434	-3.24999	-2.0423	-1.57775	-0.43178	13.5616		-3.4642
20180225	0.09	0.373879	-2.06348	-2.4288	-0.293083	0.0419729	-2.86741	-3.07098	-1.99023	-1.58511	-0.432103	13.5625		-4.1184
20180226	0	-0.816414	-0.086145	-3.25534	-0.594309	0.054098	-2.88467	-2.89025	-1.93773	-1.59246	-0.432422	13.5634		-4.1579
20180227	2.83	1.32824	1.42092	-3.38629	-0.911974	0.0698161	-2.89509	-2.70792	-1.88483	-1.59979	-0.432737	13.5643		-0.637134
20180228	0.35	-1.3722	1.3834	-2.83273	-1.22867	0.0886975	-2.89858	-2.52412	-1.83154	-1.60712	-0.43305	13.5652		-2.82153
20180301	2.48	0.713825	0.412189	-1.72707	-1.52257	0.109537	-2.89505	-2.33897	-1.77787	-1.61443	-0.433359	13.5661		-0.601054
20180302	1.97	1.22317	-1.16829	-0.222272	-1.77421	0.130772	-2.88438	-2.1526	-1.72385	-1.62173	-0.433664	13.567		-0.167394
20180303	0	-1.44874	-2.57261	1.47119	-1.96659	0.150666	-2.86642	-1.96515	-1.66949	-1.62902	-0.433966	13.5678		-2.55017
20180304	6.1	1.01722	-1.80976	3.03531	-2.08123	0.167132	-2.84106	-1.77672	-1.6148	-1.6363	-0.434265	13.5687		2.24277
20180305	5.37	-3.86975	1.84071	4.0939	-2.09876	0.177853	-2.80814	-1.58747	-1.5598	-1.64356	-0.434561	13.5696		2.06486
20180306	17.81	4.01411	4.70807	4.23652	-2.00638	0.180207	-2.76749	-1.39752	-1.50451	-1.65081	-0.434853	13.5705		12.9587
20180307	11.7	1.20358	2.86719	3.21167	-1.79873	0.171453	-2.71893	-1.20701	-1.44894	-1.65805	-0.435142	13.5713		7.28244
20180308	0	-3.92099	-1.92429	1.32204	-1.47627	0.149171	-2.66235	-1.01607	-1.39312	-1.66527	-0.435427	13.5722		-4.52324
20180309	0	1.10693	-5.12926	-0.920063	-1.04083	0.111735	-2.59761	-0.824841	-1.33705	-1.67248	-0.435709	13.5731		-4.94239
20180310	0.66	1.69496	-4.75865	-3.0141	-0.494825	0.0584467	-2.5246	-0.633469	-1.28075	-1.67968	-0.435988	13.5739		-6.07779
20180311	0.54	-1.80232	-1.44431	-4.46875	0.160262	-0.0108226	-2.44322	-0.442098	-1.22424	-1.68686	-0.436264	13.5748		-7.71538
20180312	1	-4.51463	2.76378	-4.91729	0.918084	-0.0955419	-2.35343	-0.250877	-1.16754	-1.69403	-0.436536	13.5756		-6.66814
20180313	18.13	8.59854	3.60666	-4.09487	1.74674	-0.194426	-2.25526	-0.0599552	-1.11066	-1.70119	-0.436805	13.5765		8.11033
20180314	1.57	-4.57024	-1.72704	-2.0848	2.57058	-0.305737	-2.14875	0.130515	-1.05362	-1.70833	-0.43707	13.5773		-8.38208
20180315	0.01	-4.31869	-7.69032	0.501294	3.28751	-0.427608	-2.03395	0.320384	-0.996433	-1.71545	-0.437333	13.5782		-11.5077
20180316	0.29	-7.13183	-7.82444	2.97335	3.79271	-0.557972	-1.91095	0.509501	-0.939116	-1.72256	-0.437592	13.579		-11.9829
20180317	12.8	-4.7666	-0.757798	4.74801	3.98372	-0.694115	-1.77984	0.697711	-0.881686	-1.72965	-0.437847	13.5798		-0.776386
20180318	18.88	-9.44522	9.81555	5.36364	3.77441	-0.83262	-1.64073	0.884862	-0.82416	-1.73673	-0.4381	13.5807		5.73397
20180319	44.36	15.2613	12.5889	4.41834	3.14087	-0.969167	-1.49381	1.0708	-0.766554	-1.7438	-0.438349	13.5815		32.2686
20180320	0.17	-14.9493	1.53606	2.07464	2.13462	-1.09835	-1.33932	1.25536	-0.708883	-1.75085	-0.438594	13.5823		-11.3386
20180321	1.2	0.384226	-9.36079	-0.352977	0.831395	-1.21425	-1.17756	1.4384	-0.651165	-1.75788	-0.438837	13.5831		-9.32954
20180322	0	1.53505	-8.53496	-1.5076	-0.680638	-1.31081	-1.00885	1.61976	-0.593416	-1.76489	-0.439076	13.584		-8.50752
20180323	1.33	-6.89425	0.795778	-1.14569	-2.26603	-1.38178	-0.83358	1.79929	-0.535652	-1.77189	-0.439312	13.5848		-7.24416
20180324	22.65	9.49385	6.31644	-0.0519463	-3.71804	-1.42097	-0.65213	1.97684	-0.47789	-1.77887	-0.439544	13.5856		15.7583
20180325	8.57	-1.69415	2.61885	0.754352	-4.80991	-1.42224	-0.464932	2.15225	-0.420145	-1.78584	-0.439774	13.5864		1.67906
20180326	0	-3.98492	-2.13377	0.24931	-5.34755	-1.37998	-0.27248	2.32538	-0.362434	-1.79279	-0.44	13.5872		-5.86938
20180327	0.45	-4.34194	0.301995	-2.11316	-5.25251	-1.29087	-0.0753425	2.49607	-0.304774	-1.79972	-0.440222	13.588		-6.1531
20180328	15.75	6.73213	6.56864	-5.30829	-4.58838	-1.15558	0.125837	2.66417	-0.247181	-1.80663	-0.440442	13.5888		7.99248
20180329	5.45	-4.9133	8.1806	-7.56593	-3.46767	-0.979162	0.330342	2.82954	-0.18967	-1.81353	-0.440658	13.5896		-4.29863
20180330	0.95	-5.16026	1.42542	-7.67368	-2.01329	-0.768513	0.537383	2.99201	-0.13226	-1.82041	-0.440871	13.5904		-11.4085
20180331	16.8	18.4554	-9.90839	-5.50835	-0.361922	-0.531122	0.74613	3.15145	-0.0749649	-1.82727	-0.44108	13.5912		3.03864
20180401	10.64	13.2498	-18.7557	-1.35412	1.33168	-0.27477	0.955737	3.30769	-0.0178023	-1.83411	-0.441287	13.592		-6.86001
20180402	0.4	-1.59399	-20.2113	3.86343	2.90471	-0.00731875	1.16534	3.46061	0.0392118	-1.84093	-0.44149	13.5928		-17.9418
20180403	0	-22.4933	-7.23548	8.85243	4.19371	0.263382	1.37405	3.61004	0.0960611	-1.84774	-0.44169	13.5936		-20.8764
20180404	0.09	-54.0861	19.6753	12.1878	5.04202	0.529417	1.58096	3.75584	0.152729	-1.85452	-0.441886	13.5944		-22.2229
20180405	134.17	57.6449	41.0338	12.412	5.32702	0.78307	1.78515	3.89785	0.2092	-1.86129	-0.44208	13.5952		111.091
20180406	4.83	-56.6065	28.6712	8.60127	5.0321	1.01737	1.9857	4.03595	0.265456	-1.86804	-0.44227	13.5959		-19.334
20180407	0	-20.403	-4.45227	2.24829	4.25286	1.22641	2.18167	4.16996	0.321483	-1.87476	-0.442457	13.5967		-22.607
20180408	0	15.1708	-33.8741	-4.55775	3.11818	1.40561	2.37215	4.29976	0.377263	-1.88147	-0.44264	13.5975		-23.261
20180409	0	33.8297	-45.6493	-9.77791	1.7633	1.552	2.55619	4.42518	0.43278	-1.88816	-0.442821	13.5983		-21.5975
20180410	0	26.3676	-35.8792	-11.8464	0.327569	1.66356	2.73286	4.54608	0.488019	-1.89483	-0.442998	13.599		-21.358
20180411	2.84	3.16155	-9.19853	-10.9558	-1.04397	1.73882	2.90123	4.66232	0.542963	-1.90148	-0.443172	13.5998		-16.9928
20180412	3.24	-31.8855	24.2597	-8.28599	-2.22014	1.77674	3.06046	4.77375	0.597596	-1.9081	-0.443343	13.6005		-15.9118
20180413	86.46	29.2549	43.2479	-4.92033	-3.11074	1.77685	3.20977	4.88022	0.651902	-1.91471	-0.44351	13.6013		67.5826
20180414	56.4	8.91243	30.9899	-1.73542	-3.65438	1.73956	3.34844	4.9816	0.705865	-1.92129	-0.443674	13.6021		38.1669
20180415	1.34	-20.7885	2.99568	0.942515	-3.8402	1.6659	3.47582	5.07774	0.75947	-1.92786	-0.443835	13.6028		-16.8503
20180416	0	-1.66084	-19.9738	2.93358	-3.70258	1.55726	3.59134	5.16852	0.812701	-1.9344	-0.443993	13.6036		-18.7011
20180417	0	6.54992	-29.7591	4.09318	-3.28835	1.41623	3.69446	5.25383	0.865541	-1.94092	-0.444148	13.6043		-19.116
20180418	0	1.95467	-26.7095	4.58797	-2.64647	1.24649	3.78468	5.33356	0.917977	-1.94742	-0.444299	13.605		-20.1668
20180419	0.01	-5.81539	-19.434	5.27592	-1.82885	1.0524	3.86153	5.40762	0.969991	-1.9539	-0.444447	13.6058		-19.9734
20180420	32.7	19.8107	-14.7422	6.58073	-0.900318	0.839012	3.92458	5.47595	1.02157	-1.96035	-0.444592	13.6065		11.6492
20180421	3.16	-25.6945	-1.36639	7.80814	0.0655687	0.61253	3.97345	5.53847	1.0727	-1.96679	-0.444734	13.6073		-19.2527
20180422	79.29	28.7988	18.8983	8.03904	0.989579	0.379867	4.00785	5.59514	1.12336	-1.9732	-0.444873	13.608		55.7362
20180423	25	-27.8673	22.6403	6.53855	1.78838	0.148228	4.02748	5.64592	1.17354	-1.97958	-0.445008	13.6087		1.31158
20180424	64.78	23.1613	13.7407	3.26143	2.39111	-0.0749958	4.03213	5.6908	1.22324	-1.98595	-0.44514	13.6094		40.1635
20180425	42.13	12.8687	5.41827	-1.07545	2.77519	-0.28199	4.02162	5.72976	1.27243	-1.99229	-0.445269	13.6102		17.2115
20180426	11.03	-6.9769	-0.934199	-5.58164	2.93351	-0.465604	3.99585	5.76283	1.3211	-1.99861	-0.445395	13.6109		-13.4927
20180427	0.11	-8.40913	-6.74887	-9.41603	2.86168	-0.619949	3.95491	5.79004	1.36925	-2.0049	-0.445518	13.6116		-24.574
20180428	0.54	-1.68899	-10.2708	-11.8185	2.56772	-0.741653	3.89899	5.81141	1.41686	-2.01117	-0.445637	13.6123		-23.7783
20180429	2.41	1.74291	-10.1756	-12.151	2.08913	-0.829684	3.82849	5.82701	1.46392	-2.01742	-0.445754	13.613		-20.5837
20180430	15.94	11.1597	-8.72773	-10.0585	1.47966	-0.883913	3.74389	5.83691	1.51042	-2.02364	-0.445867	13.6137		-7.62655
20180501	16.59	9.33213	-9.3993	-5.59786	0.777071	-0.902263	3.64578	5.84119	1.55635	-2.02984	-0.445977	13.6144		-5.66503
20180502	17.39	6.87381	-10.758	0.361897	0.00163827	-0.881994	3.53474	5.83996	1.6017	-2.03601	-0.446083	13.6151		-3.52227
20180503	0.71	-19.5411	-6.35123	6.42526	-0.82912	-0.820665	3.41149	5.83333	1.64646	-2.04216	-0.446187	13.6158		-19.4671
20180504	3.78	-29.9245	3.32892	11.2689	-1.69664	-0.716621	3.27676	5.82141	1.69063	-2.04828	-0.446287	13.6165		-15.3266
20180505	54.96	9.302	13.138	13.8386	-2.58269	-0.569338	3.13137	5.80432	1.73419	-2.05438	-0.446385	13.6172		36.2786
20180506	76.62	31.8629	13.9996	13.2871	-3.46821	-0.381424	2.97622	5.78221	1.77713	-2.06045	-0.446479	13.6179		59.1496
20180507	0.13	-27.7237	0.98855	9.6362	-4.32232	-0.159252	2.81225	5.75519	1.81946	-2.0665	-0.44657	13.6186		-17.099
20180508	1.61	-7.40981	-11.0785	4.215	-5.0856	0.0901143	2.64047	5.72342	1.86115	-2.07252	-0.446658	13.6193		-14.2733
20180509	15.47	12.6549	-11.3028	-1.45006	-5.69215	0.359664	2.46192	5.68702	1.90221	-2.07851	-0.446742	13.6199		-0.0979159
20180510	4.76	-7.41146	2.58604	-6.30374	-6.07381	0.642779	2.27764	5.64614	1.94262	-2.08448	-0.446824	13.6206		-11.1292
20180511	22.58	5.29999	11.1275	-9.76927	-6.15135	0.932868	2.08864	5.60093	1.98238	-2.09042	-0.446902	13.6213		6.65819
20180512	3.56	-5.94261	5.00681	-11.6241	-5.81128	1.22345	1.89593	5.55152	2.02148	-2.09634	-0.446978	13.622		-12.5599
20180513	0	3.90766	-7.79277	-12.5499	-4.92263	1.5081	1.70053	5.49806	2.05992	-2.10222	-0.44705	13.6226		-16.435
20180514	0.23	11.163	-16.0127	-13.4171	-3.3829	1.77968	1.50343	5.4407	2.09769	-2.10809	-0.447119	13.6233		-18.2668
20180515	1.73	6.72364	-10.8298	-14.653	-1.22179	2.02815	1.30561	5.37958	2.13478	-2.11392	-0.447185	13.624		-18.7592
20180516	0	-17.7778	10.1498	-15.1828	1.35825	2.24188	1.10801	5.31485	2.17119	-2.11972	-0.447247	13.6246		-22.8108
20180517	58.66	17.6332	27.8813	-13.2149	4.10053	2.40901	0.911592	5.24666	2.2069	-2.1255	-0.447307	13.6253		32.2996
20180518	9.7	-18.1132	6.60853	-7.51095	6.75374	2.51773	0.717252	5.17515	2.24192	-2.13125	-0.447363	13.6259		-19.0156
20180519	16.35	18.1737	-33.4145	0.605191	9.08538	2.55632	0.525833	5.10047	2.27624	-2.13698	-0.447417	13.6266		-14.6356
20180520	27.72	24.8438	-38.7896	9.2089	10.8677	2.51326	0.338097	5.02277	2.30984	-2.14267	-0.447467	13.6272		-4.7369
20180521	15.72	-44.5428	10.5827	16.3053	11.8726	2.37788	0.154739	4.9422	2.34273	-2.14833	-0.447514	13.6279		-17.6548
20180522	155.77	57.7991	45.6599	19.023	11.8719	2.14273	-0.0236114	4.8589	2.3749	-2.15397	-0.447558	13.6285		122.482
20180523	1.52	-65.5885	21.5741	15.2877	10.725	1.80854	-0.196433	4.77302	2.40634	-2.15958	-0.447599	13.6292		-28.7267
20180524	2.32	-17.8236	-14.129	7.13413	8.63109	1.3888	-0.363289	4.68471	2.43705	-2.16516	-0.447637	13.6298		-24.8185
20180525	9.88	20.5544	-32.9264	-2.42165	5.87398	0.899976	-0.523789	4.59412	2.46702	-2.1707	-0.447672	13.6304		-14.7937
20180526	26.56	50.8249	-33.8641	-10.6121	2.7366	0.35857	-0.677555	4.50141	2.49624	-2.17622	-0.447703	13.6311		6.34864
20180527	17.14	33.867	-18.1519	-15.4188	-0.50445	-0.21894	-0.8242	4.40672	2.52471	-2.18171	-0.447732	13.6317		0.296318
20180528	0	-0.985041	5.29599	-16.6521	-3.58471	-0.816074	-0.963335	4.31021	2.55242	-2.18717	-0.447757	13.6323		-12.3411
20180529	0.42	-16.8574	22.3644	-14.51	-6.27767	-1.41636	-1.09457	4.21202	2.57936	-2.1926	-0.44778	13.6329		-9.00301
20180530	24.09	5.24898	21.9891	-9.13619	-8.47753	-2.00328	-1.21752	4.11232	2.60553	-2.198	-0.447799	13.6335		18.1019
20180531	14.13	3.0139	9.11128	-1.54785	-10.1419	-2.56015	-1.3318	4.01126	2.63093	-2.20336	-0.447815	13.6342		10.5773
20180601	1	-2.58381	-5.06735	6.01553	-11.2377	-3.06997	-1.43704	3.90898	2.65555	-2.2087	-0.447829	13.6348		-1.63562
20180602	0.09	-2.22293	-10.1893	11.1425	-11.7322	-3.51572	-1.53285	3.80565	2.67937	-2.214	-0.447839	13.6354		-1.26969
20180603	1.33	-8.27458	-3.04845	12.2926	-11.5987	-3.88177	-1.61886	3.70142	2.70241	-2.21928	-0.447846	13.636		0.969593
20180604	27.65	11.5996	4.92767	9.96694	-10.8554	-4.15744	-1.6947	3.59644	2.72464	-2.22452	-0.44785	13.6366		26.4942
20180605	0	-11.5424	3.06187	5.4492	-9.63076	-4.33804	-1.76007	3.49088	2.74606	-2.22973	-0.44785	13.6372		-3.03129
20180606	0	-1.47597	-1.68719	0.389522	-8.08652	-4.42228	-1.81483	3.3849	2.76668	-2.23491	-0.447848	13.6378		-2.77364
20180607	0.17	2.33472	-3.50923	-3.73834	-6.38308	-4.41103	-1.85903	3.27866	2.78648	-2.24005	-0.447843	13.6384		-4.91285
20180608	4.42	7.86119	-3.77052	-6.14899	-4.66038	-4.30778	-1.89298	3.17234	2.80545	-2.24516	-0.447835	13.639		-2.05831
20180609	0.06	-0.603291	-0.750158	-6.84649	-3.02193	-4.11782	-1.9172	3.0661	2.82359	-2.25024	-0.447823	13.6396		-8.19994
20180610	0	-8.94933	5.63854	-6.47905	-1.52165	-3.84713	-1.93228	2.96011	2.8409	-2.25529	-0.447809	13.6402		-9.78985
20180611	26.27	9.85814	11.1117	-5.58296	-0.170479	-3.50253	-1.9389	2.85455	2.85737	-2.2603	-0.447792	13.6407		15.3869
20180612	10.9	-5.67472	7.90669	-4.4874	1.02929	-3.09126	-1.93778	2.74959	2.87298	-2.26528	-0.447771	13.6413		-2.25543
20180613	1.19	-7.69156	-1.3629	-3.18598	2.06926	-2.62025	-1.92965	2.64541	2.88774	-2.27023	-0.447748	13.6419		-12.2404
20180614	0.21	-2.74155	-10.8372	-1.57988	2.93725	-2.0968	-1.91526	2.54218	2.90164	-2.27514	-0.447721	13.6425		-15.1587
20180615	13.08	11.3404	-15.9004	0.470822	3.62311	-1.52986	-1.89539	2.44008	2.91468	-2.28002	-0.447691	13.643		-4.08914
20180616	2.79	-5.45453	-11.3829	2.94839	4.12322	-0.930187	-1.87082	2.33928	2.92684	-2.28486	-0.447659	13.6436		-13.8891
20180617	11.16	-13.1903	1.2041	5.40498	4.44162	-0.309794	-1.84235	2.23996	2.93812	-2.28967	-0.447623	13.6442		-6.58118
20180618	54.11	13.1771	14.523	7.23988	4.58301	0.318359	-1.81079	2.14231	2.94851	-2.29445	-0.447584	13.6447		34.9399
20180619	32.59	-11.6583	17.0412	7.86045	4.55408	0.941009	-1.77695	2.04648	2.95801	-2.29919	-0.447543	13.6453		13.2433
20180620	35.03	-1.48722	9.49939	6.8962	4.37238	1.54522	-1.74167	1.95267	2.96662	-2.30389	-0.447498	13.6458		14.9084
20180621	34	8.7374	0.0271301	4.60336	4.08693	2.11824	-1.7058	1.86104	2.97432	-2.30857	-0.44745	13.6464		13.3679
20180622	13.84	-2.64349	-4.94208	1.39001	3.76045	2.6477	-1.6702	1.77175	2.98111	-2.3132	-0.447399	13.647		-6.19556
20180623	6.24	-5.94169	-5.68894	-2.27524	3.45668	3.12177	-1.63572	1.68498	2.98698	-2.3178	-0.447346	13.6475		-13.9059
20180624	14.51	5.6593	-5.58563	-5.75764	3.23852	3.52922	-1.60319	1.60088	2.99193	-2.32236	-0.447289	13.648		-5.68396
20180625	0.84	-3.07009	-8.16464	-8.43394	3.16706	3.85975	-1.57343	1.51959	2.99595	-2.32689	-0.447229	13.6486		-19.6687
20180626	0.05	-0.79317	-10.7185	-9.98386	3.29677	4.10548	-1.54721	1.44128	2.99904	-2.33139	-0.447166	13.6491		-21.4955
20180627	0.02	-0.439911	-11.0537	-10.2513	3.66741	4.26211	-1.52527	1.36609	3.00119	-2.33584	-0.447101	13.6497		-21.7449
20180628	4.17	0.0455278	-9.31255	-9.12466	4.26967	4.32887	-1.50818	1.29413	3.0024	-2.34027	-0.447032	13.6502		-18.3917
20180629	2.6	-6.179	-8.00417	-6.58693	5.02972	4.30914	-1.49628	1.22553	3.00266	-2.34465	-0.44696	13.6507		-20.7701
20180630	26.39	16.0103	-9.88027	-2.81339	5.85303	4.20797	-1.48963	1.16038	3.00196	-2.349	-0.446885	13.6512		3.31662
20180701	10.38	-4.92518	-9.63353	1.57848	6.64356	4.03079	-1.48811	1.09877	3.0003	-2.35331	-0.446808	13.6518		-12.9802
20180702	0.58	-26.1757	-3.13802	5.8345	7.30582	3.78343	-1.49154	1.04079	2.99767	-2.35759	-0.446727	13.6523		-23.4792
20180703	70.73	28.1175	9.23796	9.20519	7.74654	3.47218	-1.49967	0.986487	2.99408	-2.36183	-0.446643	13.6528		46.5606
20180704	61.44	10.0085	16.201	10.9489	7.87983	3.10373	-1.51221	0.935896	2.98951	-2.36603	-0.446556	13.6533		37.1585
20180705	24.67	-24.1318	14.5452	10.526	7.64019	2.68509	-1.52887	0.889048	2.98397	-2.3702	-0.446467	13.6538		0.93935
20180706	55.56	19.9229	5.05414	8.26972	7.0194	2.22428	-1.54934	0.845957	2.97745	-2.37433	-0.446374	13.6543		33.2467
20180707	5.48	-15.2365	-5.4076	4.89716	6.05946	1.73071	-1.5733	0.806628	2.96995	-2.37843	-0.446279	13.6549		-15.747
20180708	2.29	-5.81643	-11.9629	1.16524	4.81556	1.21375	-1.60043	0.771053	2.96146	-2.38249	-0.44618	13.6554		-16.6141
20180709	9.08	6.63496	-12.5404	-2.21633	3.34433	0.682379	-1.6304	0.739221	2.95199	-2.38651	-0.446079	13.6559		-8.1218
20180710	5.16	4.13633	-8.58731	-4.75993	1.70249	0.145443	-1.66288	0.711115	2.94153	-2.39049	-0.445974	13.6564		-9.21091
20180711	0.07	-3.56528	-2.79377	-6.258	-0.0540672	-0.388317	-1.69752	0.686715	2.9301	-2.39444	-0.445867	13.6568		-12.617
20180712	3.59	-3.16972	2.90767	-6.71617	-1.86821	-0.910206	-1.73401	0.665996	2.91768	-2.39835	-0.445756	13.6573		-6.97822
20180713	13.51	5.23013	6.16652	-6.1953	-3.67393	-1.4115	-1.77198	0.648931	2.90428	-2.40223	-0.445643	13.6578		5.20135
20180714	4.19	-1.69702	5.1967	-4.85071	-5.38634	-1.88326	-1.8111	0.635483	2.8899	-2.40606	-0.445527	13.6583		-1.35103
20180715	0.26	-2.77011	2.16682	-3.07895	-6.90573	-2.31645	-1.851	0.625613	2.87456	-2.40986	-0.445407	13.6588		-3.68224
20180716	0.18	0.471038	-0.0800914	-1.34804	-8.13286	-2.70191	-1.89136	0.619272	2.85824	-2.41363	-0.445285	13.6593		-0.957096
20180717	0.17	0.501678	-0.712828	-0.0216949	-8.97659	-3.03035	-1.93181	0.616398	2.84096	-2.41735	-0.44516	13.6597		-0.232845
20180718	0	-0.149025	-0.368964	0.716123	-9.3642	-3.29299	-1.97198	0.616922	2.82273	-2.42104	-0.445032	13.6602		0.198134
20180719	0.36	0.63483	0.126351	0.818799	-9.25807	-3.48378	-2.01146	0.620768	2.80355	-2.4247	-0.444901	13.6607		1.57998
20180720	0	-0.742715	0.492295	0.298916	-8.65395	-3.60082	-2.0498	0.627856	2.78343	-2.42831	-0.444767	13.6612		0.0484952
20180721	0.68	-0.291038	0.80366	-0.730515	-7.5743	-3.6458	-2.08654	0.638096	2.76237	-2.43189	-0.444631	13.6616		-0.217893
20180722	2.03	0.193627	1.1466	-1.98064	-6.06366	-3.62219	-2.12123	0.651394	2.7404	-2.43543	-0.444491	13.6621		-0.640417
20180723	1.32	-0.869367	1.29262	-3.01027	-4.18972	-3.53394	-2.15342	0.667655	2.71752	-2.43894	-0.444348	13.6625		-2.58701
20180724	0.61	-3.01143	0.42486	-3.32815	-2.03815	-3.38501	-2.18268	0.686779	2.69373	-2.4424	-0.444203	13.663		-5.91472
20180725	6.78	2.438	-2.19696	-2.54978	0.280281	-3.17944	-2.20858	0.708665	2.66906	-2.44583	-0.444054	13.6635		-2.30873
20180726	21.46	16.2644	-5.82293	-0.621432	2.62309	-2.92144	-2.23068	0.733211	2.64351	-2.44922	-0.443903	13.6639		9.82005
20180727	6.08	-1.82287	-8.44243	2.14097	4.82476	-2.61555	-2.24855	0.760313	2.6171	-2.45258	-0.443748	13.6643		-8.12433
20180728	3.45	-11.1241	-6.89306	5.04414	6.71277	-2.2666	-2.26174	0.789863	2.58983	-2.4559	-0.443591	13.6648		-12.973
20180729	4.02	-25.2642	4.22818	7.2516	8.10741	-1.87964	-2.26977	0.821752	2.56173	-2.45918	-0.443431	13.6652		-13.7845
20180730	66.77	23.5064	15.6034	7.70371	8.83592	-1.45972	-2.27212	0.855867	2.53279	-2.46242	-0.443268	13.6657		46.8136
20180731	14.78	-18.5338	7.82183	5.69668	8.79205	-1.0122	-2.26829	0.892095	2.50304	-2.46562	-0.443102	13.6661		-5.01527
20180801	25.39	10.8679	-7.59793	2.23837	8.01967	-0.543953	-2.25776	0.930322	2.47249	-2.46879	-0.442934	13.6665		5.50831
20180802	6.22	1.99602	-12.2336	-1.23081	6.61674	-0.063745	-2.24004	0.970432	2.44116	-2.47192	-0.442762	13.667		-11.4684
20180803	3.11	0.139124	-10.3703	-3.39406	4.69177	0.418929	-2.2146	1.01231	2.40905	-2.47501	-0.442587	13.6674		-13.6253
20180804	4.57	-1.05939	-5.87682	-3.72086	2.36221	0.894641	-2.18096	1.05583	2.37619	-2.47806	-0.44241	13.6678		-10.6571
20180805	11.23	0.151154	0.209485	-2.48849	-0.224952	1.35482	-2.13859	1.10088	2.34258	-2.48108	-0.44223	13.6682		-2.12785
20180806	16.57	1.20316	4.97738	-0.362683	-2.87862	1.79143	-2.08703	1.14733	2.30824	-2.48405	-0.442046	13.6687		5.81786
20180807	14.88	-2.14317	5.87135	1.89609	-5.38413	2.19694	-2.0258	1.19506	2.2732	-2.48699	-0.44186	13.6691		5.62427
20180808	17.44	2.80346	3.47629	3.47582	-7.52218	2.5643	-1.95447	1.24394	2.23745	-2.4899	-0.441671	13.6695		9.75557
20180809	8.54	-1.87598	0.0652487	3.8183	-9.10347	2.8863	-1.87265	1.29386	2.20102	-2.49276	-0.44148	13.6699		2.00757
20180810	5.62	-0.787578	-2.26397	2.66775	-10.0065	3.15475	-1.78	1.34469	2.16393	-2.49558	-0.441285	13.6703		-0.383799
20180811	5.29	2.3184	-2.57914	0.0907588	-10.185	3.36143	-1.67632	1.3963	2.12618	-2.49837	-0.441087	13.6707		-0.169988
20180812	0.85	-0.759274	-1.21965	-3.58341	-9.64702	3.4998	-1.5616	1.44855	2.08779	-2.50112	-0.440887	13.6711		-5.56234
20180813	0.64	-0.883263	2.1364	-7.8542	-8.41579	3.56675	-1.43602	1.50133	2.04878	-2.50383	-0.440684	13.6715		-6.60107
20180814	4.25	-1.15933	7.01688	-11.9883	-6.52385	3.56063	-1.2999	1.55448	2.00916	-2.50651	-0.440478	13.6719		-6.13079
20180815	11.46	4.38756	9.34383	-14.9918	-4.05141	3.48065	-1.15365	1.60789	1.96895	-2.50914	-0.440269	13.6723		-1.26036
20180816	1.64	-3.53014	4.7563	-15.7499	-1.1399	3.32655	-0.997779	1.66142	1.92816	-2.51174	-0.440057	13.6727		-14.5237
20180817	9.41	9.7235	-4.8398	-13.7106	2.01049	3.09812	-0.832827	1.71494	1.88681	-2.5143	-0.439842	13.673		-8.82691
20180818	3.25	5.41542	-15.7543	-8.54932	5.17696	2.79508	-0.659395	1.7683	1.84492	-2.51682	-0.439625	13.6734		-18.8882
20180819	0.87	1.12226	-22.1553	-1.00585	8.13593	2.41745	-0.478182	1.82139	1.80249	-2.5193	-0.439405	13.6738		-22.0388
20180820	1.4	-19.7843	-13.8808	7.52732	10.6593	1.96565	-0.290051	1.87406	1.75955	-2.52174	-0.439181	13.6742		-26.1378
20180821	4.37	-46.2654	7.26755	15.2157	12.5139	1.44069	-0.0960077	1.92617	1.7161	-2.52415	-0.438956	13.6746		-23.7822
20180822	58.51	-20.0415	29.6093	20.1272	13.4666	0.845737	0.102823	1.97759	1.67217	-2.52651	-0.438727	13.6749		29.695
20180823	138.65	55.8243	34.5834	20.3764	13.3256	0.189368	0.305235	2.02819	1.62778	-2.52884	-0.438495	13.6753		110.784
20180824	0	-53.4946	11.1443	15.0397	12.0952	-0.513763	0.509993	2.07782	1.58292	-2.53113	-0.438261	13.6757		-27.3106
20180825	0	-12.7398	-17.0705	6.21326	9.99575	-1.24567	0.715896	2.12636	1.53763	-2.53338	-0.438023	13.676		-23.597
20180826	0	11.8833	-29.1999	-3.31348	7.30201	-1.98796	0.921751	2.17366	1.49191	-2.5356	-0.437783	13.6764		-20.6301
20180827	0.19	16.5172	-21.8434	-11.1662	4.29115	-2.72236	1.12637	2.21959	1.44579	-2.53777	-0.43754	13.6767		-16.4925
20180828	5.02	12.6037	-5.53834	-16.1488	1.23382	-3.43077	1.32856	2.26402	1.39927	-2.5399	-0.437295	13.6771		-9.08343
20180829	3.12	2.17392	8.71371	-17.8481	-1.63001	-4.09514	1.52718	2.3068	1.35238	-2.542	-0.437046	13.6774		-6.96044
20180830	8.76	3.92813	14.4955	-16.4209	-4.09527	-4.69732	1.72108	2.34782	1.30512	-2.54406	-0.436795	13.6778		2.00276
20180831	3.73	-0.740268	12.101	-12.4724	-6.02287	-5.21873	1.90915	2.38694	1.25752	-2.54608	-0.436541	13.6781		-1.11163
20180901	1.3	-0.625689	6.00669	-7.12136	-7.34687	-5.64139	2.09034	2.42405	1.20959	-2.54805	-0.436284	13.6785		-1.74036
20180902	0.28	0.661639	-1.34563	-1.23721	-8.11299	-5.95061	2.26366	2.45901	1.16134	-2.54999	-0.436024	13.6788		-1.9212
20180903	3.98	4.52488	-7.60654	4.59322	-8.45301	-6.13411	2.42827	2.4917	1.11279	-2.5519	-0.435762	13.6791		1.51156
20180904	5.74	0.293478	-7.52056	9.58331	-8.4946	-6.1801	2.58341	2.52201	1.06396	-2.55376	-0.435496	13.6795		2.35623
20180905	1.1	-15.0007	0.194478	13.2162	-8.30483	-6.07699	2.72843	2.54981	1.01486	-2.55558	-0.435228	13.6798		-1.59003
20180906	43.95	17.2497	7.67616	15.1174	-7.9264	-5.81413	2.86284	2.57499	0.965499	-2.55737	-0.434958	13.6801		40.0432
20180907	24.93	0.398034	5.0265	15.0771	-7.41997	-5.38391	2.98627	2.59743	0.915903	-2.55911	-0.434684	13.6804		20.5017
20180908	1.2	-15.286	-2.94209	13.4918	-6.87272	-4.78494	3.09837	2.61703	0.866085	-2.56082	-0.434408	13.6808		-4.73628
20180909	2.73	-8.2919	-8.01939	11.0752	-6.36916	-4.02588	3.19885	2.63368	0.816059	-2.56248	-0.434128	13.6811		-5.23611
20180910	14.09	2.65113	-5.19208	8.38157	-5.93278	-3.12912	3.28739	2.64728	0.765841	-2.56411	-0.433846	13.6814		5.84062
20180911	11.94	-7.43387	4.83658	5.1537	-5.46204	-2.12491	3.36369	2.65775	0.715445	-2.5657	-0.433562	13.6817		2.55641
20180912	32.13	10.816	8.11208	0.863977	-4.80654	-1.04523	3.42744	2.665	0.664886	-2.56725	-0.433274	13.682		19.7921
20180913	0.89	-9.20034	1.51216	-4.71237	-3.85261	0.0775595	3.47831	2.66896	0.614179	-2.56876	-0.432984	13.6823		-12.4006
20180914	5.35	3.14957	-2.22546	-10.9047	-2.57255	1.21151	3.51598	2.66957	0.563338	-2.57023	-0.432691	13.6826		-9.98059
20180915	2.58	1.28478	-1.59917	-16.4037	-0.968605	2.32592	3.54012	2.66677	0.512377	-2.57166	-0.432395	13.6829		-16.7181
20180916	4.48	3.97337	-2.37762	-19.2285	0.948283	3.39311	3.55039	2.66051	0.461309	-2.57305	-0.432097	13.6832		-17.6328
20180917	9.73	8.88531	-6.07827	-17.9077	3.12508	4.38956	3.54645	2.65076	0.410147	-2.5744	-0.431796	13.6835		-15.1006
20180918	18.33	9.97422	-6.3847	-12.3414	5.40715	5.29466	3.52794	2.63748	0.358906	-2.57572	-0.431492	13.6838		-8.7519
20180919	1.97	-27.9887	2.99417	-3.781	7.60326	6.08894	3.49452	2.62065	0.307597	-2.57699	-0.431185	13.6841		-28.7755
20180920	85.09	35.7276	10.2833	5.63647	9.51888	6.75307	3.44581	2.60024	0.256232	-2.57822	-0.430875	13.6844		51.6473
20180921	26.9	-25.0056	3.33816	13.698	10.9602	7.26786	3.38153	2.57626	0.204824	-2.57942	-0.430563	13.6847		-7.9695
20180922	13.51	-32.4091	-8.36923	18.6946	11.7368	7.61534	3.30143	2.54872	0.153384	-2.58057	-0.430248	13.6849		-22.0838
20180923	0.86	-43.9254	-10.6854	19.4476	11.6936	7.78218	3.20543	2.51763	0.101924	-2.58169	-0.429931	13.6852		-35.1632
20180924	59.71	9.6635	0.4993	15.5178	10.8299	7.76348	3.09382	2.48302	0.0504551	-2.58276	-0.42961	13.6855		25.6807
20180925	87.91	36.4523	11.407	8.23585	9.29149	7.56752	2.96739	2.44493	-0.00101237	-2.5838	-0.429287	13.6857		56.0952
20180926	8.91	-28.8901	8.55792	-0.536739	7.24768	7.21054	2.82736	2.40342	-0.0524673	-2.58479	-0.428961	13.686		-20.8689
20180927	9.07	-5.97571	-3.79704	-8.8742	4.86658	6.71019	2.67508	2.35855	-0.103899	-2.58575	-0.428633	13.6863		-18.6469
20180928	5.39	7.22612	-11.1758	-14.9337	2.31639	6.08397	2.51191	2.31038	-0.155297	-2.58666	-0.428301	13.6865		-18.8834
20180929	0.03	3.78229	-6.98866	-17.3308	-0.235223	5.34936	2.33922	2.25898	-0.206652	-2.58754	-0.427967	13.6868		-20.5372
20180930	0.26	-3.88341	3.4976	-16.1444	-2.63232	4.52382	2.15836	2.2044	-0.257952	-2.58838	-0.427631	13.6871		-16.5302
20181001	15.55	4.0917	10.3465	-12.3321	-4.76285	3.62485	1.97067	2.14673	-0.309188	-2.58917	-0.427291	13.6873		2.10603
20181002	7.04	-3.55611	7.06234	-6.95719	-6.54834	2.66987	1.77749	2.08602	-0.360348	-2.58993	-0.426949	13.6876		-3.45095
20181003	10.83	4.73007	-1.06573	-1.07582	-7.92379	1.67595	1.58014	2.02235	-0.411423	-2.59065	-0.426605	13.6878		2.58852
20181004	0.28	-3.04728	-6.61357	4.21639	-8.83539	0.660036	1.37994	1.95578	-0.462403	-2.59133	-0.426257	13.688		-5.44446
20181005	0.03	-5.96688	-6.22215	8.0569	-9.23199	-0.360745	1.17821	1.88637	-0.513277	-2.59196	-0.425907	13.6883		-4.13213
20181006	11.32	-1.15585	-0.570802	10.1367	-9.06844	-1.36872	0.976258	1.8142	-0.564037	-2.59256	-0.425554	13.6885		8.41001
20181007	25.32	7.54468	5.02089	10.4438	-8.33407	-2.34668	0.775407	1.73934	-0.614671	-2.59312	-0.425198	13.6888		23.0094
20181008	19.05	2.42283	5.4329	9.12632	-7.08316	-3.27909	0.576972	1.66186	-0.665172	-2.59364	-0.42484	13.689		16.9821
20181009	8.64	-1.41412	1.22631	6.61907	-5.43064	-4.15169	0.382264	1.58182	-0.715529	-2.59412	-0.424479	13.6892		6.43126
20181010	0	-3.28248	-3.24583	3.41912	-3.51501	-4.95089	0.19259	1.49931	-0.765732	-2.59455	-0.424116	13.6894		-3.10919
20181011	0.03	-0.167318	-3.92314	0.0339893	-1.48091	-5.66347	0.00925577	1.4144	-0.815772	-2.59495	-0.42375	13.6897		-4.05647
20181012	0	-2.57257	-0.162105	-2.94167	0.527044	-6.27638	-0.166452	1.32716	-0.865641	-2.59531	-0.423381	13.6899		-5.67635
20181013	10.01	4.58519	3.66231	-4.89383	2.36856	-6.77678	-0.333259	1.23768	-0.915328	-2.59563	-0.423009	13.6901		3.35367
20181014	2.95	-1.8347	2.82237	-5.37575	3.92015	-7.15225	-0.489915	1.14603	-0.964826	-2.59591	-0.422635	13.6903		-4.38808
20181015	3.35	1.79051	-1.93634	-4.38583	5.09979	-7.39161	-0.635216	1.0523	-1.01412	-2.59614	-0.422258	13.6905		-4.53166
20181016	1.43	0.498777	-5.79436	-2.27634	5.86798	-7.48704	-0.768109	0.956556	-1.06321	-2.59634	-0.421878	13.6907		-7.57192
20181017	0	-4.46603	-4.88746	0.448624	6.21066	-7.4352	-0.887826	0.858893	-1.11209	-2.5965	-0.421496	13.6909		-8.90487
20181018	4.29	-8.10512	1.46024	3.09098	6.12513	-7.23766	-0.994003	0.759397	-1.16074	-2.59662	-0.421111	13.6911		-3.5539
20181019	30.56	10.8357	7.07392	4.85094	5.61762	-6.89976	-1.08661	0.658159	-1.20915	-2.59669	-0.420724	13.6913		22.7605
20181020	13.19	-4.07761	4.85854	5.12249	4.71368	-6.43126	-1.16585	0.555271	-1.25732	-2.59673	-0.420333	13.6915		5.90342
20181021	2.87	-6.40387	-1.16461	4.16428	3.47912	-5.84702	-1.23216	0.450829	-1.30524	-2.59673	-0.419941	13.6917		-3.40419
20181022	0.12	-3.08111	-4.73921	2.57574	2.00676	-5.16408	-1.28607	0.344927	-1.3529	-2.59669	-0.419545	13.6919		-5.24458
20181023	4.03	3.42699	-4.01433	0.926244	0.395475	-4.39979	-1.32815	0.237658	-1.40029	-2.5966	-0.419147	13.6921		0.338902
20181024	0.13	-2.39329	-0.528892	-0.43835	-1.24646	-3.57157	-1.35899	0.129117	-1.4474	-2.59648	-0.418746	13.6923		-3.36054
20181025	6.56	3.18674	1.92401	-1.43979	-2.78916	-2.69693	-1.37918	0.0193998	-1.49423	-2.59632	-0.418343	13.6925		3.67096
20181026	0.26	-1.07606	1.9186	-2.23101	-4.08969	-1.79348	-1.38931	-0.0913962	-1.54076	-2.59611	-0.417937	13.6926		-1.38846
20181027	0.1	-0.401659	1.59138	-3.17776	-5.00974	-0.878809	-1.38998	-0.203174	-1.58699	-2.59587	-0.417528	13.6928		-1.98803
20181028	0.13	0.171905	2.60062	-4.55876	-5.44534	0.0300838	-1.38178	-0.315836	-1.6329	-2.59558	-0.417117	13.693		-1.78623
20181029	0	-0.863747	3.95837	-6.2469	-5.35302	0.917538	-1.36531	-0.429284	-1.6785	-2.59526	-0.416703	13.6932		-3.15228
20181030	0	0.257075	4.11859	-7.7135	-4.75999	1.76988	-1.34117	-0.543421	-1.72376	-2.59489	-0.416287	13.6933		-3.33783
20181031	0	-0.383767	2.30911	-8.22172	-3.73834	2.57497	-1.30999	-0.658148	-1.76869	-2.59449	-0.415868	13.6935		-6.29637
20181101	0	1.08711	-2.09318	-7.0566	-2.3937	3.32165	-1.27237	-0.773367	-1.81328	-2.59404	-0.415446	13.6936		-8.06267
20181102	0	2.63845	-8.48416	-3.8989	-0.858755	3.99904	-1.22893	-0.88898	-1.85751	-2.59356	-0.415022	13.6938		-9.74461
20181103	0	0.667807	-12.7772	0.86351	0.719776	4.5962	-1.1803	-1.00489	-1.90138	-2.59303	-0.414595	13.694		-11.2459
20181104	0.88	-11.3868	-8.1103	6.23734	2.19402	5.10223	-1.12708	-1.121	-1.94487	-2.59246	-0.414165	13.6941		-13.2598
20181105	42.77	10.7368	6.59015	10.7108	3.41642	5.50621	-1.06992	-1.23722	-1.988	-2.59186	-0.413733	13.6943		28.0377
20181106	46.93	1.86391	16.7409	12.594	4.24181	5.79747	-1.00946	-1.35346	-2.03073	-2.59121	-0.413299	13.6944		31.1988
20181107	50.62	14.4444	9.03601	10.715	4.5681	5.96756	-0.946389	-1.46962	-2.07307	-2.59052	-0.412861	13.6945		34.1954
20181108	0.88	-15.3566	-6.77583	6.08842	4.4351	6.01534	-0.881388	-1.5856	-2.11501	-2.58979	-0.412421	13.6947		-16.0441
20181109	0	-2.5789	-13.0874	0.312886	3.93773	5.94668	-0.815077	-1.70133	-2.15653	-2.58903	-0.411979	13.6948		-15.3534
20181110	4.02	3.47791	-8.90652	-5.08273	3.17654	5.77151	-0.74799	-1.81669	-2.19764	-2.58822	-0.411534	13.695		-10.5113
20181111	11.95	9.41551	-2.34381	-8.89921	2.25225	5.5012	-0.680528	-1.9316	-2.23832	-2.58737	-0.411086	13.6951		-1.82751
20181112	3.34	0.35349	1.09451	-10.2077	1.26337	5.14787	-0.613049	-2.04597	-2.27857	-2.58648	-0.410636	13.6952		-8.75968
20181113	0.37	-1.96232	0.244997	-8.72204	0.293141	4.72397	-0.545899	-2.15972	-2.31837	-2.58555	-0.410183	13.6953		-10.4394
20181114	1.34	-0.80033	-2.37212	-5.11171	-0.609098	4.24226	-0.479418	-2.27278	-2.35771	-2.58458	-0.409728	13.6955		-8.28416
20181115	0.93	-3.8269	-2.32395	-0.807158	-1.40343	3.71574	-0.413943	-2.38505	-2.3966	-2.58357	-0.40927	13.6956		-6.95801
20181116	7.22	-3.71844	1.41619	2.87853	-2.05099	3.15731	-0.349813	-2.49647	-2.43501	-2.58252	-0.40881	13.6957		0.576273
20181117	16.88	-0.0079316	5.77555	5.19517	-2.51492	2.57995	-0.287365	-2.60696	-2.47295	-2.58143	-0.408347	13.6958		10.9628
20181118	24.15	8.94622	5.9743	5.67997	-2.76926	1.99615	-0.226936	-2.71643	-2.5104	-2.58029	-0.407881	13.6959		20.6005
20181119	0.23	-8.89318	0.980077	4.4622	-2.81952	1.41753	-0.168867	-2.82482	-2.54735	-2.57912	-0.407413	13.696		-3.4509
20181120	0.13	-2.19279	-2.7482	2.36784	-2.70369	0.854801	-0.113495	-2.93204	-2.5838	-2.57791	-0.406942	13.6961		-2.57315
20181121	3.95	4.36607	-2.66827	0.279342	-2.46802	0.317511	-0.0611623	-3.03803	-2.61974	-2.57666	-0.406469	13.6962		1.97714
20181122	0.58	0.70585	-0.497021	-1.27179	-2.15645	-0.185968	-0.0122047	-3.14271	-2.65515	-2.57536	-0.405993	13.6963		-1.06296
20181123	0	-1.44194	0.834093	-2.08503	-1.80697	-0.64864	0.0330656	-3.24602	-2.69003	-2.57403	-0.405515	13.6964		-2.69288
20181124	1.22	0.438391	0.534665	-2.21596	-1.44376	-1.06535	0.0743454	-3.34788	-2.72437	-2.57266	-0.405034	13.6965		-1.2429
20181125	0.2	-0.386395	0.00177532	-1.94672	-1.07125	-1.4331	0.111361	-3.44824	-2.75816	-2.57124	-0.404551	13.6966		-2.33134
20181126	0	-0.762884	0.251451	-1.59826	-0.682727	-1.75033	0.143915	-3.54703	-2.7914	-2.56979	-0.404065	13.6967		-2.10969
20181127	2.89	1.63938	0.696259	-1.32292	-0.270988	-2.01692	0.171894	-3.6442	-2.82406	-2.56829	-0.403577	13.6968		1.01272
20181128	0.11	-1.29894	0.380201	-1.08486	0.155467	-2.23394	0.195249	-3.7397	-2.85615	-2.56676	-0.403086	13.6969		-2.00359
20181129	0.05	-0.793061	-0.384749	-0.790086	0.577598	-2.4034	0.213981	-3.83346	-2.88766	-2.56518	-0.402592	13.6969		-1.9679
20181130	3.46	2.65946	-1.04564	-0.365606	0.970969	-2.52752	0.228147	-3.92546	-2.91857	-2.56356	-0.402096	13.697		1.24822
20181201	1.03	-1.41128	-1.04742	0.203921	1.31059	-2.60884	0.237864	-4.01564	-2.94888	-2.5619	-0.401598	13.6971		-2.25477
20181202	1.07	-3.12301	0.0812266	0.825317	1.57526	-2.65044	0.243333	-4.10397	-2.97857	-2.56021	-0.401097	13.6971		-2.21647
20181203	9.35	4.37577	1.41377	1.34207	1.74581	-2.65558	0.24482	-4.19043	-3.00764	-2.55847	-0.400593	13.6972		7.13161
20181204	5.48	0.194049	1.26946	1.60348	1.80642	-2.62736	0.242627	-4.27497	-3.03609	-2.55669	-0.400087	13.6973		3.06699
20181205	0.93	-3.71444	0.354133	1.53921	1.75043	-2.56917	0.237081	-4.35758	-3.06389	-2.55487	-0.399579	13.6973		-1.82109
20181206	4.29	0.0798422	-0.0331144	1.17176	1.58528	-2.48453	0.228542	-4.43824	-3.09104	-2.55301	-0.399068	13.6974		1.21849
20181207	5.12	2.86309	-0.134407	0.589806	1.33127	-2.37686	0.217401	-4.51691	-3.11753	-2.55111	-0.398554	13.6974		3.31849
20181208	1.11	-1.26293	-0.674943	-0.0731146	1.01409	-2.24972	0.204098	-4.5936	-3.14335	-2.54917	-0.398038	13.6975		-2.01099
20181209	0.35	-0.18215	-1.11273	-0.672849	0.66377	-2.10665	0.189099	-4.66828	-3.16849	-2.54719	-0.39752	13.6975		-1.96773
20181210	0.03	0.103917	-0.735409	-1.10744	0.311276	-1.9512	0.17288	-4.74096	-3.19295	-2.54517	-0.396999	13.6976		-1.73893
20181211	0.03	-0.0636571	-0.0447602	-1.32907	-0.0146509	-1.78694	0.155895	-4.81161	-3.21671	-2.54311	-0.396475	13.6976		-1.43749
20181212	0.02	0.447085	0.434152	-1.34338	-0.290816	-1.61733	0.138569	-4.88026	-3.23976	-2.541	-0.395949	13.6977		-0.462143
20181213	0	-0.273341	0.571032	-1.21009	-0.50032	-1.44584	0.12132	-4.94689	-3.2621	-2.53886	-0.395421	13.6977		-0.912401
20181214	0	0.357728	0.488986	-0.990215	-0.632631	-1.27574	0.10455	-5.01153	-3.28371	-2.53668	-0.39489	13.6977		-0.143501
20181215	0.04	-0.105505	0.290212	-0.704111	-0.685056	-1.10994	0.0886269	-5.07417	-3.30459	-2.53445	-0.394356	13.6978		-0.519403
20181216	0	-0.130728	-0.107496	-0.379677	-0.662619	-0.951092	0.0738847	-5.13485	-3.32472	-2.53219	-0.393821	13.6978		-0.6179
20181217	0	0.0457848	-0.635342	-0.0521411	-0.574118	-0.801358	0.0605945	-5.19358	-3.34411	-2.52988	-0.393282	13.6978		-0.641699
20181218	0	-0.503386	-0.847453	0.264234	-0.432409	-0.662065	0.0489967	-5.25038	-3.36273	-2.52754	-0.392741	13.6978		-1.0866
20181219	3.24	1.30123	-0.716692	0.573141	-0.255551	-0.533977	0.0392917	-5.30528	-3.38058	-2.52515	-0.392198	13.6979		1.15768
20181220	0	-2.07804	-0.189505	0.869662	-0.0632628	-0.417722	0.0316449	-5.35831	-3.39765	-2.52272	-0.391653	13.6979		-1.39788
20181221	4.22	0.364466	0.69634	1.09913	0.12426	-0.313744	0.0261933	-5.40949	-3.41393	-2.52025	-0.391104	13.6979		2.15994
20181222	6.2	1.4862	1.12	1.18327	0.288478	-0.222114	0.0230374	-5.45887	-3.42942	-2.51774	-0.390554	13.6979		3.78947
20181223	4.96	0.406958	0.477686	1.08407	0.413936	-0.142535	0.0222429	-5.50646	-3.44411	-2.5152	-0.390001	13.6979		1.96871
20181224	0.9	-1.87875	-0.474756	0.836328	0.489535	-0.074584	0.02383	-5.55231	-3.45798	-2.51261	-0.389445	13.6979		-1.51718
20181225	3.07	1.16455	-0.81537	0.53519	0.511378	-0.0177642	0.0277699	-5.59643	-3.47103	-2.50998	-0.388887	13.6979		0.884369
20181226	1.68	-0.355161	-0.623421	0.287649	0.479483	0.0288597	0.0339837	-5.63886	-3.48326	-2.5073	-0.388327	13.6979		-0.690932
20181227	1.38	-0.975736	-0.102328	0.139146	0.398907	0.0664675	0.0423426	-5.67961	-3.49466	-2.50459	-0.387764	13.6979		-0.938918
20181228	2.04	-0.882258	0.671555	0.0693888	0.279834	0.0963551	0.0526639	-5.71869	-3.50523	-2.50184	-0.387199	13.6979		-0.141314
20181229	5.48	2.2019	1.15114	-0.0128707	0.134869	0.119716	0.064688	-5.75611	-3.51495	-2.49904	-0.386631	13.6979		3.34017
20181230	2.51	0.108566	0.626712	-0.170707	-0.0214963	0.137613	0.0781235	-5.79189	-3.52382	-2.49621	-0.386061	13.6979		0.564571
20181231	0.06	-1.41861	-0.317673	-0.393751	-0.173406	0.151108	0.0926673	-5.82605	-3.53184	-2.49333	-0.385489	13.6979		-2.13003
20190101	0	0.173741	-0.595407	-0.616368	-0.306021	0.161251	0.107985	-5.85858	-3.53901	-2.49042	-0.384914	13.6978		-1.03803
20190102	0	0.312959	-0.185057	-0.752069	-0.405671	0.169045	0.123737	-5.8895	-3.54531	-2.48746	-0.384336	13.6978		-0.624166
20190103	0.06	-0.601908	0.361696	-0.73235	-0.461637	0.175317	0.139566	-5.9188	-3.55076	-2.48446	-0.383756	13.6978		-0.972562
20190104	1.58	0.656752	0.363808	-0.553264	-0.467372	0.180729	0.155094	-5.94647	-3.55533	-2.48142	-0.383174	13.6978		0.467297
20190105	1.21	0.822065	-0.309855	-0.273122	-0.423049	0.185871	0.169927	-5.97249	-3.55904	-2.47834	-0.38259	13.6977		0.239088
20190106	0.03	-0.517042	-1.16576	0.01332	-0.334732	0.191196	0.18367	-5.99685	-3.56188	-2.47521	-0.382003	13.6977		-1.66948
20190107	0.1	-0.283341	-1.0496	0.228988	-0.21192	0.197178	0.195922	-6.01952	-3.56385	-2.47205	-0.381413	13.6977		-1.10395
20190108	0.48	-1.68587	0.660379	0.324661	-0.0668189	0.204272	0.206285	-6.04048	-3.56495	-2.46885	-0.380822	13.6976		-0.700829
20190109	6.99	3.61429	2.02127	0.28152	0.0852613	0.212867	0.214376	-6.0597	-3.56518	-2.4656	-0.380227	13.6976		5.91708
20190110	1.09	-1.51275	1.16579	0.144843	0.226663	0.223126	0.219832	-6.07717	-3.56454	-2.46231	-0.379631	13.6975		-0.202115
20190111	0.82	-0.601766	-0.829396	0.0103413	0.33908	0.235042	0.222313	-6.09286	-3.56304	-2.45898	-0.379032	13.6975		-1.42082
20190112	0.13	-0.266444	-1.77364	-0.0305817	0.406469	0.248543	0.221496	-6.10673	-3.56067	-2.45561	-0.37843	13.6974		-2.07066
20190113	0	-1.0975	-0.88595	0.0693678	0.418601	0.263627	0.217094	-6.11876	-3.55745	-2.4522	-0.377827	13.6974		-1.91408
20190114	3.12	0.0523003	0.816878	0.246528	0.370224	0.280366	0.208871	-6.12893	-3.55336	-2.44874	-0.377221	13.6973		1.11571
20190115	6.98	2.78531	1.46746	0.410305	0.261912	0.298968	0.196632	-6.13719	-3.54841	-2.44525	-0.376612	13.6972		4.66307
20190116	0.86	-1.86713	0.466335	0.501204	0.100282	0.319542	0.180216	-6.14353	-3.54261	-2.44171	-0.376001	13.6972		-0.899594
20190117	0	-1.02484	-0.933996	0.515545	-0.101796	0.342096	0.159493	-6.14792	-3.53595	-2.43813	-0.375388	13.6971		-1.44329
20190118	0.03	-0.108167	-1.24792	0.464677	-0.323629	0.366533	0.134361	-6.15033	-3.52845	-2.43451	-0.374772	13.697		-0.891407
20190119	0.29	-0.18443	-0.428865	0.337327	-0.537217	0.392639	0.104753	-6.15073	-3.52011	-2.43085	-0.374155	13.697		-0.275968
20190120	3.73	1.16518	0.453032	0.0955918	-0.715265	0.420055	0.0706254	-6.1491	-3.51092	-2.42715	-0.373534	13.6969		1.7138
20190121	0.75	-0.729165	0.676696	-0.260966	-0.834835	0.448316	0.0319546	-6.1454	-3.5009	-2.42341	-0.372912	13.6968		-0.313434
20190122	0	-0.238972	0.603836	-0.702057	-0.878904	0.476783	-0.0112584	-6.1396	-3.49005	-2.41962	-0.372287	13.6967		-0.337192
20190123	0	0.187351	0.357528	-1.15057	-0.837373	0.504751	-0.0589846	-6.13166	-3.47837	-2.41579	-0.371659	13.6966		-0.605693
20190124	0	-0.398907	0.14882	-1.47862	-0.708593	0.5314	-0.111156	-6.12156	-3.46588	-2.41193	-0.371029	13.6966		-1.72871
20190125	0	-0.0851345	-0.179841	-1.49914	-0.50186	0.555766	-0.167659	-6.10925	-3.45257	-2.40802	-0.370397	13.6965		-1.76411
20190126	0.71	0.508424	-1.09473	-1.08876	-0.236662	0.576758	-0.228337	-6.09472	-3.43846	-2.40407	-0.369763	13.6964		-1.67507
20190127	0.03	0.705326	-2.10499	-0.251017	0.0566741	0.593138	-0.292992	-6.07792	-3.42355	-2.40008	-0.369126	13.6963		-1.65068
20190128	0.25	-0.989542	-1.59112	0.820755	0.345149	0.60364	-0.3614	-6.05882	-3.40785	-2.39605	-0.368487	13.6962		-1.75991
20190129	0.59	-4.38268	1.07025	1.79644	0.596909	0.607065	-0.433337	-6.03741	-3.39136	-2.39197	-0.367846	13.6961		-1.51599
20190130	14.11	6.484	3.33867	2.33021	0.781533	0.60222	-0.508522	-6.01365	-3.37409	-2.38786	-0.367202	13.696		12.1529
20190131	3.46	-2.51722	2.1314	2.17381	0.876105	0.588121	-0.58659	-5.9875	-3.35606	-2.38371	-0.366556	13.6959		1.78799
20190201	0.6	-2.21613	-0.62402	1.43895	0.875963	0.564256	-0.667116	-5.95894	-3.33725	-2.37951	-0.365907	13.6958		-1.4012
20190202	0.19	0.0360015	-1.95081	0.41224	0.791933	0.530511	-0.749645	-5.92795	-3.3177	-2.37528	-0.365257	13.6956		-1.50257
20190203	0.53	0.807056	-1.34884	-0.603651	0.640836	0.487178	-0.833711	-5.89449	-3.29739	-2.371	-0.364604	13.6955		-1.14543
20190204	0.14	0.12098	-0.182229	-1.34229	0.441989	0.434788	-0.918857	-5.85853	-3.27634	-2.36669	-0.363948	13.6954		-1.40354
20190205	0	-0.442853	0.432836	-1.65199	0.219453	0.374043	-1.00462	-5.82005	-3.25457	-2.36233	-0.363291	13.6953		-1.66201
20190206	0	0.174281	0.513727	-1.55484	-0.00171681	0.30574	-1.09054	-5.77903	-3.23206	-2.35794	-0.362631	13.6951		-0.866828
20190207	0.1	0.0180218	0.355736	-1.17527	-0.200834	0.230862	-1.17613	-5.73543	-3.20885	-2.3535	-0.361968	13.695		-0.80151
20190208	0.06	0.446966	0.0114361	-0.683989	-0.36607	0.150664	-1.26091	-5.68924	-3.18492	-2.34902	-0.361304	13.6949		-0.225586
20190209	0.51	-0.0853233	-0.0700997	-0.232359	-0.490507	0.0664682	-1.34439	-5.64044	-3.1603	-2.34451	-0.360637	13.6948		-0.387782
20190210	1.23	-0.266526	0.116212	0.0934978	-0.568855	-0.0205157	-1.42609	-5.58901	-3.13499	-2.33995	-0.359968	13.6946		-0.0568155
20190211	0.24	-0.0268706	0.239277	0.253534	-0.600697	-0.109342	-1.50549	-5.53492	-3.10901	-2.33535	-0.359296	13.6945		0.46594
20190212	0.09	-0.100245	0.0958412	0.265961	-0.591442	-0.199389	-1.58212	-5.47815	-3.08235	-2.33072	-0.358623	13.6943		0.261557
20190213	0.03	-0.188844	-0.0932011	0.171091	-0.549239	-0.290281	-1.6555	-5.41869	-3.05503	-2.32604	-0.357947	13.6942		-0.110954
20190214	0.06	0.229717	-0.0799079	0.0437836	-0.483223	-0.381667	-1.72516	-5.35651	-3.02706	-2.32132	-0.357268	13.694		0.193593
20190215	0.05	-0.152906	-0.0306793	-0.0369593	-0.401542	-0.473138	-1.79064	-5.29159	-2.99845	-2.31657	-0.356588	13.6939		-0.220544
20190216	0.11	0.521794	-0.0755948	-0.0213195	-0.3092	-0.564292	-1.85149	-5.22393	-2.96921	-2.31177	-0.355905	13.6937		0.42488
20190217	0.19	0.097553	-0.125529	0.0996391	-0.209482	-0.654851	-1.90728	-5.1535	-2.93934	-2.30694	-0.35522	13.6936		0.0716634
20190218	0.21	-0.318694	-0.209369	0.291329	-0.105471	-0.744552	-1.95758	-5.0803	-2.90886	-2.30207	-0.354532	13.6934		-0.236735
20190219	0	0.341367	-0.188418	0.481222	0.00287845	-0.833414	-2.00197	-5.00431	-2.87778	-2.29715	-0.353842	13.6932		0.634172
20190220	0.19	-0.334474	-0.117951	0.604634	0.117349	-0.921427	-2.04004	-4.92554	-2.8461	-2.2922	-0.353151	13.6931		0.152209
20190221	1.29	0.568443	-0.0615141	0.597967	0.238736	-1.00837	-2.0714	-4.84398	-2.81384	-2.28721	-0.352456	13.6929		1.1049
20190222	0	-1.01443	0.204267	0.422276	0.365215	-1.09398	-2.09568	-4.75964	-2.78101	-2.28218	-0.35176	13.6927		-0.387885
20190223	2.42	0.835397	0.523407	0.0876326	0.492909	-1.17775	-2.11256	-4.67251	-2.74761	-2.27711	-0.351061	13.6925		1.44644
20190224	1.17	0.47477	0.394592	-0.339284	0.617465	-1.25888	-2.12176	-4.58261	-2.71366	-2.272	-0.35036	13.6924		0.530078
20190225	0.17	-0.597428	-0.0222947	-0.766355	0.732885	-1.33643	-2.12309	-4.48994	-2.67916	-2.26685	-0.349657	13.6922		-1.38608
20190226	0.13	-0.0212339	-0.241267	-1.07786	0.829917	-1.40921	-2.1164	-4.39452	-2.64414	-2.26167	-0.348951	13.692		-1.34036
20190227	1.32	0.972758	-0.303917	-1.14064	0.897308	-1.47561	-2.10164	-4.29638	-2.60859	-2.25644	-0.348244	13.6918		-0.4718
20190228	0	-1.12634	-0.142957	-0.866186	0.923355	-1.53352	-2.07883	-4.19553	-2.57253	-2.25118	-0.347534	13.6916		-2.13548
20190301	0.88	-1.24437	0.00803999	-0.251846	0.89631	-1.58058	-2.04803	-4.09201	-2.53597	-2.24588	-0.346821	13.6914		-1.48817
20190302	4.76	2.6402	-0.381038	0.633707	0.802851	-1.61471	-2.00938	-3.98585	-2.49891	-2.24054	-0.346107	13.6912		2.89287
20190303	0	-1.71668	-0.846017	1.60279	0.63263	-1.63422	-1.96309	-3.8771	-2.46138	-2.23516	-0.34539	13.691		-0.959902
20190304	1.03	-2.5666	-0.305817	2.40181	0.381118	-1.63774	-1.90942	-3.76581	-2.42337	-2.22975	-0.344671	13.6908		-0.470611
20190305	9.05	3.76187	0.825938	2.79891	0.0488614	-1.62447	-1.8487	-3.65202	-2.38491	-2.22429	-0.34395	13.6906		7.38672
20190306	1.64	-2.76469	0.942743	2.65488	-0.352122	-1.59424	-1.78136	-3.53579	-2.346	-2.2188	-0.343227	13.6904		0.832936
20190307	4.05	0.506571	0.234517	2.01469	-0.798132	-1.54722	-1.70787	-3.41718	-2.30665	-2.21327	-0.342501	13.6902		2.75578
20190308	2.59	0.907687	-0.595782	1.08111	-1.25881	-1.48392	-1.62876	-3.29623	-2.26688	-2.20771	-0.341774	13.69		1.39301
20190309	0.4	-0.610219	-1.06859	0.0993233	-1.69571	-1.40512	-1.54454	-3.17301	-2.22669	-2.2021	-0.341044	13.6898		-1.57948
20190310	0	0.671157	-0.807452	-0.761459	-2.06513	-1.31165	-1.45576	-3.04758	-2.1861	-2.19646	-0.340311	13.6895		-0.897754
20190311	0	0.0230308	0.0757015	-1.4395	-2.3196	-1.20423	-1.36297	-2.91999	-2.14511	-2.19078	-0.339577	13.6893		-1.34077
20190312	0.04	-1.18591	1.1561	-2.03309	-2.41384	-1.08358	-1.26673	-2.7903	-2.10374	-2.18506	-0.33884	13.6891		-2.0629
20190313	2.94	0.901034	2.00551	-2.66156	-2.30766	-0.950513	-1.16761	-2.65857	-2.062	-2.17931	-0.338102	13.6889		0.244988
20190314	1.68	0.168691	2.36315	-3.34218	-1.97436	-0.805921	-1.06621	-2.52487	-2.0199	-2.17351	-0.337361	13.6886		-0.810335
20190315	1.68	-0.602353	2.08632	-3.85115	-1.41882	-0.651307	-0.963156	-2.38925	-1.97745	-2.16768	-0.336618	13.6884		-2.36718
20190316	3.45	1.97475	0.354505	-3.79693	-0.684282	-0.48859	-0.859054	-2.25177	-1.93466	-2.16182	-0.335872	13.6882		-1.46768
20190317	4.91	4.62524	-3.6546	-2.79262	0.17054	-0.319851	-0.754522	-2.1125	-1.89155	-2.15591	-0.335125	13.6879		-1.82198
20190318	0	1.22547	-8.01331	-0.818759	1.07759	-0.147208	-0.650172	-1.97149	-1.84812	-2.14997	-0.334375	13.6877		-7.6066
20190319	0.06	-2.41937	-8.15773	1.78022	1.96176	0.027201	-0.546619	-1.82881	-1.80439	-2.144	-0.333623	13.6874		-8.79689
20190320	3.2	-12.2131	0.190153	4.44173	2.74524	0.201173	-0.444474	-1.68452	-1.76036	-2.13798	-0.332869	13.6872		-7.58117
20190321	42.3	12.1073	11.9499	6.43007	3.34941	0.372556	-0.344342	-1.53868	-1.71605	-2.13193	-0.332113	13.6869		30.4873
20190322	29.51	-3.55189	14.1698	7.0184	3.69886	0.539243	-0.246811	-1.39134	-1.67148	-2.12584	-0.331355	13.6867		17.6363
20190323	23.91	-1.68051	6.69229	5.87368	3.74451	0.699451	-0.152459	-1.24258	-1.62664	-2.11972	-0.330595	13.6864		10.8855
20190324	10.66	-2.57234	-3.06909	3.56392	3.49452	0.852498	-0.0618566	-1.09245	-1.58155	-2.11356	-0.329832	13.6861		-2.07751
20190325	0	-3.17362	-9.9586	0.871356	2.98123	0.998681	0.0244566	-0.941021	-1.53623	-2.10736	-0.329068	13.6859		-12.2609
20190326	0.07	0.89614	-12.6387	-1.4037	2.24082	1.13876	0.105999	-0.788357	-1.49068	-2.10113	-0.328301	13.6856		-13.1463
20190327	0	1.92592	-11.8918	-2.60984	1.31218	1.27383	0.182339	-0.634522	-1.44492	-2.09486	-0.327532	13.6853		-12.5757
20190328	0.85	-0.288375	-7.11503	-2.64775	0.24355	1.40516	0.253087	-0.479583	-1.39896	-2.08856	-0.326761	13.6851		-10.0512
20190329	0	-10.901	2.39095	-2.0278	-0.898359	1.53397	0.317878	-0.323608	-1.3528	-2.08221	-0.325988	13.6848		-10.5378
20190330	32.18	12.9456	10.4337	-1.37168	-2.03267	1.66143	0.376391	-0.166668	-1.30646	-2.07584	-0.325213	13.6845		22.0076
20190331	13.06	-5.14915	9.40649	-1.20919	-3.07593	1.78871	0.428339	-0.00883768	-1.25995	-2.06943	-0.324436	13.6842		3.04815
20190401	1.65	-9.55693	3.67405	-1.69416	-3.95496	1.91699	0.473478	0.149807	-1.21329	-2.06298	-0.323656	13.6839		-7.57704
20190402	0.66	-3.73326	-0.517586	-2.72903	-4.61199	2.04739	0.5116	0.309187	-1.16648	-2.05649	-0.322875	13.6837		-6.97988
20190403	5.67	3.71628	-1.78965	-4.09657	-5.00587	2.18104	0.542517	0.46922	-1.11953	-2.04997	-0.322091	13.6834		-2.16994
20190404	4.05	3.57364	-2.0698	-5.41692	-5.10274	2.3187	0.566083	0.629819	-1.07246	-2.04342	-0.321306	13.6831		-3.91308
20190405	0.01	-0.210368	-3.31036	-6.23991	-4.87329	2.46029	0.582198	0.790897	-1.02527	-2.03683	-0.320518	13.6828		-9.76063
20190406	0	1.72196	-4.92333	-6.36033	-4.30184	2.60468	0.59083	0.952365	-0.977984	-2.0302	-0.319728	13.6825		-9.56171
20190407	0	-1.37051	-4.20422	-5.87519	-3.40297	2.74973	0.592019	1.11413	-0.930606	-2.02354	-0.318936	13.6822		-11.4499
20190408	0	-7.59534	-0.309297	-4.95548	-2.22	2.89249	0.585892	1.27611	-0.883148	-2.01684	-0.318143	13.6819		-12.8601
20190409	26.6	12.3518	3.58718	-3.67477	-0.821702	3.0297	0.572625	1.4382	-0.835622	-2.01011	-0.317347	13.6815		12.2642
20190410	10.56	-4.779	0.705686	-2.19182	0.707392	3.15799	0.552449	1.60032	-0.78804	-2.00335	-0.316549	13.6812		-6.26513
20190411	5.4	-6.51394	-5.92855	-0.69473	2.27434	3.27395	0.525641	1.76237	-0.740412	-1.99655	-0.315749	13.6809		-13.1372
20190412	0	-15.9798	-5.12422	0.688302	3.78546	3.37413	0.492534	1.92426	-0.692749	-1.98971	-0.314947	13.6806		-20.4157
20190413	0.09	-29.1138	5.39187	1.89369	5.14764	3.45505	0.45351	2.08589	-0.645063	-1.98284	-0.314143	13.6803		-21.8283
20190414	72.33	32.3815	14.8371	2.85887	6.26959	3.51321	0.408988	2.24716	-0.597365	-1.97593	-0.313337	13.68		50.0775
20190415	13.38	-21.1075	7.11711	3.54499	7.06398	3.54524	0.359445	2.40798	-0.549667	-1.96899	-0.312529	13.6796		-10.4454
20190416	0.1	-17.6682	-10.8249	4.11748	7.44709	3.54812	0.30541	2.56825	-0.501979	-1.96202	-0.311719	13.6793		-24.3757
20190417	0	-8.32002	-21.3401	4.84745	7.34456	3.5195	0.247454	2.72787	-0.454314	-1.95501	-0.310907	13.679		-24.8127
20190418	0	-18.4198	-11.4654	5.84899	6.72016	3.45758	0.186188	2.88674	-0.406681	-1.94796	-0.310093	13.6786		-24.0362
20190419	12.83	-26.7499	9.39777	6.56874	5.61526	3.36124	0.122265	3.04476	-0.359093	-1.94089	-0.309277	13.6783		-10.7834
20190420	80.06	29.6211	22.1974	6.29472	4.11269	3.23008	0.0563519	3.20184	-0.31156	-1.93377	-0.308459	13.6779		58.1132
20190421	15.29	-25.166	15.9673	4.57025	2.30958	3.0638	-0.0108582	3.35788	-0.264095	-1.92663	-0.307639	13.6776		-4.62837
20190422	2.65	-18.4635	1.66367	1.79853	0.318765	2.8621	-0.0786559	3.51278	-0.216707	-1.91945	-0.306818	13.6773		-15.0013
20190423	0	-3.14019	-10.3608	-1.34669	-1.7442	2.62467	-0.146327	3.66644	-0.169409	-1.91223	-0.305994	13.6769		-14.8477
20190424	0.18	5.47174	-14.706	-4.18321	-3.76359	2.3512	-0.213162	3.81877	-0.122212	-1.90498	-0.305168	13.6765		-13.4174
20190425	0.66	6.73253	-11.8547	-6.14218	-5.62465	2.04139	-0.27846	3.96968	-0.0751276	-1.8977	-0.30434	13.6762		-11.2644
20190426	0	2.09857	-4.82969	-6.91554	-7.21944	1.69497	-0.341539	4.11907	-0.028166	-1.89038	-0.303511	13.6758		-9.64666
20190427	0.09	-4.85834	3.58341	-6.57365	-8.45831	1.31179	-0.401759	4.26685	0.0186609	-1.88303	-0.302679	13.6755		-7.84858
20190428	16.39	5.13613	9.36628	-5.27911	-9.2694	0.891914	-0.45855	4.41293	0.0653419	-1.87565	-0.301846	13.6751		9.22331
20190429	17.86	5.78967	8.71135	-3.12092	-9.61474	0.436076	-0.511411	4.55723	0.111866	-1.86823	-0.30101	13.6747		11.3801
20190430	0.82	-7.53222	2.30617	-0.458467	-9.49446	-0.0530444	-0.559925	4.69967	0.158221	-1.86078	-0.300173	13.6744		-5.68452
20190501	0.26	-3.66644	-5.03405	2.04903	-8.9322	-0.570484	-0.603747	4.84015	0.204397	-1.8533	-0.299334	13.674		-6.65146
20190502	8.41	7.59486	-9.55575	3.71332	-7.95984	-1.1096	-0.642567	4.9786	0.250382	-1.84578	-0.298492	13.6736		1.75243
20190503	4.96	2.11236	-9.15832	4.04169	-6.61354	-1.66325	-0.676101	5.11493	0.296164	-1.83823	-0.297649	13.6732		-3.00427
20190504	1.82	-7.04407	-3.25455	3.07921	-4.94511	-2.22395	-0.704071	5.24907	0.341733	-1.83065	-0.296804	13.6728		-7.21942
20190505	25.42	6.16695	6.91801	1.31756	-3.02492	-2.78402	-0.726206	5.38092	0.387077	-1.82303	-0.295958	13.6725		14.4025
20190506	22.52	-6.01739	16.2262	-0.596139	-0.938768	-3.33571	-0.742249	5.51043	0.432185	-1.81538	-0.295109	13.6721		9.61265
20190507	34.48	7.21135	14.9761	-2.03756	1.22097	-3.87123	-0.751958	5.63751	0.477046	-1.8077	-0.294258	13.6717		20.1499
20190508	1.75	-9.0707	-2.53463	-2.60796	3.36497	-4.3828	-0.755102	5.7621	0.521648	-1.79998	-0.293406	13.6713		-14.2133
20190509	2.94	9.54446	-22.1665	-2.18981	5.4133	-4.86266	-0.751458	5.88413	0.565981	-1.79223	-0.292551	13.6709		-14.8119
20190510	0	1.45081	-20.2531	-0.83651	7.29762	-5.30312	-0.740812	6.00353	0.610033	-1.78445	-0.291695	13.6705		-19.6388
20190511	0.03	-24.5709	3.01863	0.916568	8.95906	-5.69666	-0.722955	6.12024	0.653795	-1.77663	-0.290837	13.6701		-20.6358
20190512	77.06	25.8366	27.0499	2.21872	10.3405	-6.03584	-0.697695	6.2342	0.697256	-1.76879	-0.289977	13.6697		55.1052
20190513	31.11	-18.3926	24.0932	2.38479	11.3788	-6.31364	-0.664858	6.34536	0.740404	-1.76091	-0.289116	13.6693		8.08536
20190514	9.07	-17.9005	1.56172	1.62794	11.9912	-6.52358	-0.624304	6.45365	0.783229	-1.753	-0.288252	13.6689		-14.7108
20190515	5.73	2.13475	-21.2183	0.499043	12.1024	-6.65975	-0.575944	6.55903	0.825721	-1.74505	-0.287387	13.6684		-18.5845
20190516	2.29	4.25147	-24.88	-0.471307	11.6566	-6.71838	-0.519765	6.66145	0.867869	-1.73708	-0.286519	13.668		-21.0998
20190517	0.03	-13.811	-7.14715	-0.993002	10.6288	-6.69858	-0.455857	6.76086	0.909662	-1.72907	-0.28565	13.6676		-21.9511
20190518	49.2	16.2082	12.6564	-1.11542	9.04992	-6.60126	-0.384417	6.85723	0.951091	-1.72103	-0.28478	13.6672		27.7492
20190519	20.46	-17.3207	19.0457	-0.9516	7.00174	-6.42822	-0.305719	6.9505	0.992146	-1.71295	-0.283907	13.6667		0.773377
20190520	47.13	16.5641	13.3022	-0.639283	4.58337	-6.18189	-0.220096	7.04065	1.03282	-1.70485	-0.283033	13.6663		29.227
20190521	0.86	-13.7722	-0.658568	-0.189754	1.89676	-5.86487	-0.127926	7.12765	1.07309	-1.69671	-0.282156	13.6659		-14.6205
20190522	0	-2.52213	-11.6043	0.52698	-0.957952	-5.4798	-0.0296139	7.21146	1.11296	-1.68855	-0.281278	13.6654		-13.5994
20190523	0	-2.98816	-10.4664	1.58243	-3.87136	-5.02929	0.0744035	7.29207	1.15242	-1.68035	-0.280398	13.665		-11.8722
20190524	3.95	-5.83911	-2.14002	2.6865	-6.69503	-4.51591	0.183665	7.36943	1.19145	-1.67211	-0.279517	13.6646		-5.29263
20190525	26.47	12.5247	3.18386	3.37669	-9.24777	-3.94224	0.297697	7.44355	1.23004	-1.66385	-0.278633	13.6641		19.0852
20190526	0.18	-12.4725	3.23746	3.07647	-11.3412	-3.31086	0.416023	7.51438	1.2682	-1.65556	-0.277748	13.6637		-6.15856
20190527	10.39	-2.2257	5.29928	1.07339	-12.7989	-2.6245	0.538162	7.58192	1.3059	-1.64723	-0.276861	13.6632		4.14698
20190528	22.25	9.8256	8.86342	-2.42844	-13.4901	-1.88652	0.663643	7.64614	1.34313	-1.63887	-0.275973	13.6628		16.2606
20190529	7.48	-3.78181	9.9987	-6.19557	-13.328	-1.10181	0.792007	7.70704	1.37989	-1.63048	-0.275082	13.6623		0.0213213
20190530	12.42	5.19351	6.76242	-8.95803	-12.2696	-0.278467	0.922797	7.76459	1.41617	-1.62206	-0.27419	13.6618		2.9979
20190531	0.04	0.689345	-2.91504	-9.61615	-10.3418	0.570621	1.05556	7.81879	1.45196	-1.61361	-0.273296	13.6614		-11.8418
20190601	0.73	8.64878	-16.096	-7.69385	-7.65268	1.43081	1.18982	7.86963	1.48724	-1.60513	-0.272401	13.6609		-15.1411
20190602	0	2.51227	-20.3043	-2.96923	-4.40592	2.28715	1.32514	7.9171	1.52202	-1.59662	-0.271503	13.6604		-20.7613
20190603	0	-19.4507	-8.58736	3.56176	-0.85875	3.12466	1.46104	7.96119	1.55628	-1.58808	-0.270604	13.66		-24.4763
20190604	0	-52.8442	13.757	9.51467	2.71742	3.92836	1.59707	8.00191	1.59001	-1.5795	-0.269704	13.6595		-29.5725
20190605	129.2	58.0164	25.2694	12.0387	6.0529	4.68325	1.73275	8.03926	1.62322	-1.5709	-0.268801	13.659		95.3245
20190606	0.03	-56.405	9.99892	9.23984	8.90402	5.37437	1.86762	8.07322	1.65588	-1.56226	-0.267897	13.6585		-37.1662
20190607	0.85	-33.2618	-9.13519	3.02953	11.1185	5.98673	2.0012	8.10379	1.68799	-1.5536	-0.266991	13.6581		-39.3675
20190608	29.25	9.60968	-19.3331	-3.77957	12.6128	6.50554	2.13299	8.13099	1.71955	-1.5449	-0.266083	13.6576		-13.503
20190609	54.39	32.6667	-13.6918	-8.66188	13.3176	6.91654	2.26248	8.1548	1.75055	-1.53618	-0.265174	13.6571		10.313
20190610	10.9	-29.2659	6.34219	-10.2216	13.1711	7.20723	2.38911	8.17524	1.78098	-1.52742	-0.264263	13.6566		-33.1453
20190611	78.61	30.856	11.4038	-7.5497	12.1756	7.37152	2.51238	8.19229	1.81083	-1.51863	-0.26335	13.6561		34.7101
20190612	18.96	-21.9961	0.113461	-0.909576	10.4967	7.41366	2.63175	8.20597	1.84011	-1.50982	-0.262436	13.6556		-22.7922
20190613	0.11	-36.0785	-9.97319	5.75382	8.34775	7.34137	2.74678	8.21628	1.8688	-1.50097	-0.26152	13.6551		-40.2979
20190614	2.19	-42.3082	-2.52868	8.52549	5.94484	7.16269	2.85704	8.22322	1.89689	-1.4921	-0.260603	13.6546		-36.3114
20190615	96.79	39.3478	14.3708	7.25182	3.48781	6.88562	2.96213	8.22681	1.92439	-1.4832	-0.259683	13.6541		60.9704
20190616	9.44	-31.514	5.99608	3.00701	1.10224	6.51819	3.06165	8.22706	1.95129	-1.47426	-0.258762	13.6536		-22.5109
20190617	32.24	22.9708	-18.6858	-2.23744	-1.11522	6.06843	3.15522	8.22399	1.97758	-1.4653	-0.25784	13.6531		2.04755
20190618	3.46	6.86842	-24.5788	-6.28881	-3.07301	5.54448	3.24243	8.21761	2.00325	-1.45631	-0.256916	13.6525		-23.9992
20190619	2.72	-2.16193	-12.8967	-7.48348	-4.68287	4.95473	3.32289	8.20794	2.02832	-1.44729	-0.25599	13.652		-22.5421
20190620	10.52	-17.4647	10.2289	-6.29031	-5.88353	4.30816	3.3962	8.195	2.05277	-1.43824	-0.255062	13.6515		-13.5262
20190621	50.83	-1.62239	32.5984	-3.76012	-6.68915	3.61539	3.46198	8.17882	2.0766	-1.42917	-0.254133	13.651		27.2159
20190622	80.37	23.9482	35.6729	-0.880207	-7.15751	2.88909	3.51986	8.15941	2.09981	-1.42006	-0.253202	13.6504		58.7408
20190623	4.16	-26.727	8.45534	1.68507	-7.35803	2.1433	3.56945	8.13682	2.1224	-1.41093	-0.25227	13.6499		-16.5866
20190624	0.84	3.35491	-25.6007	3.7335	-7.36694	1.39326	3.61041	8.11106	2.14436	-1.40177	-0.251336	13.6494		-18.5123
20190625	15.43	29.8821	-38.3954	5.16286	-7.26053	0.655211	3.64238	8.08217	2.1657	-1.39258	-0.250401	13.6488		-3.35042
20190626	0.67	-9.85854	-13.683	5.8621	-7.11293	-0.0550568	3.66502	8.05019	2.18641	-1.38336	-0.249464	13.6483		-17.6794
20190627	13.58	-31.4023	21.7229	5.68204	-6.98804	-0.72227	3.67798	8.01516	2.20649	-1.37412	-0.248525	13.6478		-3.99737
20190628	87.52	30.9115	34.3383	4.44599	-6.92834	-1.33218	3.68094	7.97711	2.22594	-1.36485	-0.247585	13.6472		69.6958
20190629	3	-28.7612	12.8408	2.11515	-6.95394	-1.87199	3.67358	7.93609	2.24477	-1.35555	-0.246643	13.6467		-13.8052
20190630	0.13	-1.37536	-13.7254	-0.729908	-7.06643	-2.33142	3.65561	7.89216	2.26296	-1.34623	-0.2457	13.6461		-15.8307
20190701	0	12.7609	-24.754	-3.35817	-7.25099	-2.70282	3.62673	7.84536	2.28053	-1.33687	-0.244755	13.6456		-15.3514
20190702	0.4	5.10457	-15.9277	-5.05304	-7.47785	-2.98072	3.58675	7.79576	2.29746	-1.32749	-0.243808	13.645		-15.8762
20190703	3.52	-6.34616	0.261614	-5.19457	-7.70787	-3.16118	3.53556	7.74341	2.31377	-1.31809	-0.24286	13.6444		-11.2791
20190704	32.56	15.3943	6.21131	-3.27565	-7.89612	-3.24147	3.47317	7.68838	2.32945	-1.30866	-0.241911	13.6439		18.33
20190705	1.03	-12.8218	-1.0626	0.529526	-7.99717	-3.22023	3.39975	7.63074	2.3445	-1.2992	-0.24096	13.6433		-13.3548
20190706	0.22	-12.9989	-5.89903	4.55801	-7.96748	-3.0981	3.3156	7.57055	2.35893	-1.28971	-0.240008	13.6427		-14.3399
20190707	2.43	-24.5517	5.42936	7.07607	-7.76834	-2.87917	3.22113	7.50787	2.37273	-1.2802	-0.239054	13.6422		-12.0462
20190708	67.74	29.4219	16.5945	7.05232	-7.36895	-2.57064	3.11675	7.44277	2.38592	-1.27066	-0.238098	13.6416		53.0688
20190709	1.12	-29.0045	10.4699	4.04227	-6.75508	-2.1826	3.00288	7.37533	2.39848	-1.2611	-0.237141	13.641		-14.4923
20190710	0.46	-15.9059	0.0886508	-0.8384	-5.95458	-1.72625	2.87994	7.3056	2.41042	-1.25151	-0.236183	13.6404		-16.6556
20190711	3.66	-5.06083	-3.67881	-6.04715	-5.01325	-1.21294	2.74837	7.23365	2.42174	-1.2419	-0.235223	13.6398		-14.7868
20190712	21.09	16.7609	-5.20969	-10.3226	-3.97873	-0.654186	2.6086	7.15956	2.43245	-1.23226	-0.234262	13.6393		1.22868
20190713	6.64	5.58821	-7.24021	-12.6022	-2.89982	-0.061764	2.46111	7.0834	2.44254	-1.22259	-0.233299	13.6387		-14.2542
20190714	1.44	-1.43144	-7.51455	-12.5454	-1.82801	0.552048	2.30633	7.00523	2.45203	-1.2129	-0.232335	13.6381		-21.4914
20190715	5.77	-5.25964	-3.4289	-10.4797	-0.805289	1.17449	2.14472	6.92513	2.4609	-1.20318	-0.231369	13.6375		-19.1682
20190716	27.66	5.82906	3.50359	-6.90619	0.145668	1.79268	1.97674	6.84316	2.46917	-1.19344	-0.230402	13.6369		2.42645
20190717	24.01	-9.21983	8.46405	-2.21483	1.01279	2.39379	1.80285	6.7594	2.47683	-1.18367	-0.229434	13.6363		-2.97061
20190718	50.65	14.7086	4.82034	3.17543	1.78653	2.96487	1.62348	6.67391	2.48389	-1.17388	-0.228464	13.6357		22.7043
20190719	58.41	24.5518	-3.19991	8.62661	2.45501	3.49329	1.4391	6.58677	2.49035	-1.16406	-0.227493	13.6351		29.9785
20190720	5.88	-28.3526	-8.68331	13.3317	3.00488	3.96683	1.25017	6.49804	2.49621	-1.15422	-0.22652	13.6345		-23.7042
20190721	2.82	-36.9008	-6.61196	16.6443	3.42191	4.37384	1.05712	6.40779	2.50148	-1.14436	-0.225546	13.6338		-26.8684
20190722	35.28	-16.1617	3.4131	18.2071	3.69225	4.7041	0.860417	6.31609	2.50616	-1.13447	-0.224571	13.6332		5.45847
20190723	96.26	37.3293	10.9469	17.6068	3.81963	4.94889	0.660482	6.22301	2.51024	-1.12455	-0.223594	13.6326		65.8829
20190724	38.44	-12.6586	6.42154	14.5729	3.84777	5.10045	0.457752	6.12863	2.51374	-1.11461	-0.222616	13.632		8.3359
20190725	20.04	-14.6305	-4.84784	9.60644	3.8338	5.15182	0.252652	6.033	2.51666	-1.10465	-0.221637	13.6314		-9.87186
20190726	3.39	-17.9672	-12.4219	3.39932	3.83491	5.0968	0.0456204	5.9362	2.51899	-1.09467	-0.220656	13.6307		-26.9897
20190727	0.21	-13.1219	-12.7137	-3.26769	3.90638	4.93014	-0.162907	5.8383	2.52075	-1.08466	-0.219674	13.6301		-29.1033
20190728	0.16	-14.2745	-4.9339	-9.4703	4.09948	4.64804	-0.372457	5.73937	2.52193	-1.07463	-0.218691	13.6295		-28.6787
20190729	7.33	-15.1593	8.71716	-14.4682	4.45192	4.24881	-0.582455	5.63947	2.52254	-1.06457	-0.217706	13.6288		-20.9103
20190730	19.33	-14.1681	21.9553	-17.5022	4.99406	3.73484	-0.792239	5.53868	2.52257	-1.05449	-0.21672	13.6282		-9.71493
20190731	52.77	18.6453	24.1228	-17.9307	5.73706	3.11384	-1.00112	5.43707	2.52204	-1.04439	-0.215733	13.6275		24.8374
20190801	0.74	-19.7804	8.06054	-15.5723	6.62682	2.39787	-1.20841	5.3347	2.52095	-1.03427	-0.214744	13.6269		-27.2921
20190802	2.37	1.56469	-16.3902	-10.9104	7.55231	1.60158	-1.4134	5.23165	2.5193	-1.02413	-0.213754	13.6262		-25.7359
20190803	13.64	23.9277	-32.2609	-4.56248	8.37517	0.741867	-1.61541	5.12797	2.51708	-1.01396	-0.212763	13.6256		-12.8956
20190804	16.25	12.4854	-25.8852	2.69953	8.95896	-0.163265	-1.81375	5.02376	2.51431	-1.00377	-0.211771	13.6249		-10.7002
20190805	2.61	-31.4692	-1.24586	9.4951	9.17649	-1.09569	-2.00774	4.91906	2.511	-0.993557	-0.210778	13.6243		-23.22
20190806	53.16	-9.3027	23.8443	14.2782	8.9059	-2.03651	-2.19668	4.81395	2.50713	-0.983323	-0.209783	13.6236		28.8198
20190807	104.18	35.2874	30.6741	15.508	8.04181	-2.96645	-2.3799	4.70851	2.50272	-0.973068	-0.208787	13.623		81.4695
20190808	8.55	-33.1925	10.218	12.3009	6.56538	-3.8674	-2.55671	4.6028	2.49777	-0.962792	-0.207789	13.6223		-10.6736
20190809	11.61	0.138254	-12.0099	6.25654	4.5775	-4.72294	-2.72644	4.49688	2.49228	-0.952494	-0.206791	13.6216		-5.61508
20190810	1.54	6.6259	-17.4928	-0.438352	2.21346	-5.51706	-2.88842	4.39082	2.48626	-0.942175	-0.205791	13.6209		-11.3052
20190811	0.44	7.03468	-11.209	-5.8055	-0.388821	-6.23381	-3.04197	4.2847	2.4797	-0.931836	-0.20479	13.6203		-9.97984
20190812	0.15	5.73967	-3.17361	-8.49449	-3.0926	-6.85715	-3.18642	4.17857	2.47263	-0.921475	-0.203788	13.6196		-5.92842
20190813	0	2.97841	2.01371	-8.10816	-5.75637	-7.37097	-3.32112	4.0725	2.46502	-0.911094	-0.202785	13.6189		-3.11605
20190814	0	2.093	4.23414	-5.36365	-8.20324	-7.75901	-3.4454	3.96656	2.45691	-0.900693	-0.201781	13.6182		0.96349
20190815	0.03	0.159564	4.05722	-1.57061	-10.2339	-8.00498	-3.55861	3.86082	2.44827	-0.890271	-0.200775	13.6175		2.64617
20190816	0	0.341914	2.64169	1.94562	-11.6528	-8.09278	-3.6601	3.75533	2.43913	-0.879829	-0.199768	13.6168		4.92922
20190817	0	0.0473936	1.5555	4.04462	-12.2918	-8.00751	-3.74931	3.65016	2.42948	-0.869367	-0.19876	13.6161		5.64751
20190818	0	0.0865894	1.31325	4.00609	-12.0333	-7.7414	-3.82586	3.54537	2.41933	-0.858885	-0.197751	13.6155		5.40593
20190819	0.07	-0.175629	1.66354	1.76456	-10.8692	-7.30352	-3.88963	3.44101	2.40868	-0.848384	-0.196741	13.6148		3.25247
20190820	0	1.11244	2.27986	-2.02954	-8.91549	-6.71417	-3.94065	3.33715	2.39754	-0.837863	-0.19573	13.614		1.36276
20190821	0.51	1.91468	2.48639	-6.23733	-6.37586	-5.99718	-3.97899	3.23382	2.38592	-0.827322	-0.194717	13.6133		-1.83626
20190822	0.13	2.68642	1.19685	-9.36854	-3.48453	-5.17714	-4.00477	3.13108	2.37381	-0.816763	-0.193704	13.6126		-5.48527
20190823	0.02	4.3978	-3.49666	-9.98889	-0.472752	-4.27893	-4.01811	3.02895	2.36122	-0.806184	-0.192689	13.6119		-9.08775
20190824	1.67	6.76707	-10.5826	-7.33934	2.45792	-3.32746	-4.01915	2.92747	2.34816	-0.795586	-0.191673	13.6112		-11.1549
20190825	5.69	2.26667	-12.308	-1.7546	5.13869	-2.34762	-4.00799	2.82666	2.33464	-0.784969	-0.190656	13.6105		-11.796
20190826	0.04	-22.5279	-2.73408	5.4653	7.41167	-1.3643	-3.98476	2.72654	2.32065	-0.774334	-0.189638	13.6098		-19.7967
20190827	16.1	-30.9391	12.2126	12.0169	9.12016	-0.402336	-3.94957	2.62711	2.3062	-0.76368	-0.188619	13.609		-6.70958
20190828	92.24	32.6537	20.2822	15.3324	10.1102	0.514064	-3.90251	2.52836	2.29131	-0.753008	-0.187599	13.6083		68.2683
20190829	29.48	-18.4256	9.32835	13.5666	10.286	1.36375	-3.8437	2.43031	2.27596	-0.742317	-0.186578	13.6076		4.46939
20190830	0.44	-24.4111	-8.1862	7.8229	9.75352	2.13068	-3.77324	2.33294	2.26018	-0.731608	-0.185556	13.6069		-24.7744
20190831	26.07	16.4092	-16.1539	-0.0494435	8.69405	2.80239	-3.69123	2.23624	2.24396	-0.720882	-0.184532	13.6061		0.205886
20190901	1.58	-1.49594	-11.8384	-7.98256	7.30936	3.36792	-3.59778	2.14019	2.22732	-0.710137	-0.183508	13.6054		-21.3169
20190902	0.03	-2.20399	-7.69223	-13.5133	5.80936	3.81729	-3.49299	2.04476	2.21025	-0.699375	-0.182483	13.6046		-23.4095
20190903	0.32	2.77862	-8.85215	-14.891	4.39671	4.14184	-3.37696	1.94993	2.19276	-0.688595	-0.181456	13.6039		-20.9646
20190904	5.17	9.67275	-13.357	-12.0487	3.21279	4.33412	-3.24991	1.85567	2.17487	-0.677797	-0.180429	13.6032		-15.733
20190905	2.48	3.89523	-16.0001	-6.11215	2.28168	4.3887	-3.11222	1.76196	2.15656	-0.666982	-0.1794	13.6024		-18.217
20190906	1.78	-9.04961	-10.1371	1.05489	1.59282	4.30504	-2.96447	1.66875	2.13786	-0.656151	-0.178371	13.6017		-18.1318
20190907	3.67	-29.3639	6.5351	7.49248	1.12532	4.09114	-2.80735	1.57603	2.11877	-0.645302	-0.17734	13.6009		-15.3363
20190908	82.67	31.8058	22.0303	11.3086	0.850479	3.76165	-2.64157	1.48376	2.09929	-0.634436	-0.176309	13.6001		65.1447
20190909	17.19	-29.512	17.8287	11.1517	0.730658	3.33471	-2.46788	1.3919	2.07942	-0.623553	-0.175276	13.5994		-0.53158
20190910	10.3	-17.6297	2.50676	7.84642	0.711999	2.83038	-2.28701	1.30041	2.05919	-0.612654	-0.174243	13.5986		-7.27656
20190911	4.73	-5.593	-9.95516	3.05944	0.731205	2.26954	-2.09972	1.20928	2.03859	-0.601739	-0.173209	13.5978		-12.4887
20190912	0	-1.59378	-13.5338	-1.54068	0.722358	1.67328	-1.90678	1.11845	2.01762	-0.590807	-0.172173	13.5971		-16.6683
20190913	0.26	-1.25656	-10.4361	-4.64424	0.615493	1.06264	-1.70896	1.02791	1.99631	-0.579859	-0.171137	13.5963		-16.3369
20190914	6.3	1.55667	-5.10179	-5.68619	0.33681	0.457836	-1.50702	0.937613	1.97464	-0.568895	-0.1701	13.5955		-9.23131
20190915	11.92	2.57013	-0.026002	-4.78878	-0.167274	-0.122952	-1.30175	0.847528	1.95263	-0.557916	-0.169061	13.5947		-2.24465
20190916	12.77	-1.15234	3.42719	-2.48498	-0.900799	-0.664801	-1.09393	0.757625	1.93029	-0.54692	-0.168022	13.594		-0.210135
20190917	14.71	-0.650364	3.79163	0.497342	-1.83998	-1.15669	-0.884347	0.667869	1.90763	-0.535909	-0.166982	13.5932		3.6386
20190918	23.84	8.68698	1.83748	3.08034	-2.94508	-1.59056	-0.673774	0.578229	1.88464	-0.524883	-0.165941	13.5924		13.6048
20190919	4.72	-11.3587	2.03472	4.18238	-4.16437	-1.96079	-0.46299	0.488673	1.86134	-0.513841	-0.164899	13.5916		-5.14163
20190920	25.86	11.5092	4.0471	3.45872	-5.43229	-2.26319	-0.252768	0.399168	1.83773	-0.502785	-0.163857	13.5908		19.015
20190921	0.22	-9.24166	1.46022	1.49164	-6.68421	-2.49467	-0.0438667	0.309684	1.81382	-0.491713	-0.162813	13.59		-6.2898
20190922	0	-1.57598	-2.03785	-0.677225	-7.85777	-2.65299	0.162987	0.220189	1.78962	-0.480627	-0.161768	13.5892		-4.29106
20190923	0.02	0.711078	-1.83065	-2.15355	-8.8877	-2.7362	0.367096	0.130651	1.76513	-0.469526	-0.160723	13.5884		-3.27312
20190924	0.68	0.36113	0.229761	-2.90429	-9.69038	-2.74276	0.567819	0.0410401	1.74037	-0.45841	-0.159677	13.5876		-2.3134
20190925	1.22	0.483671	1.15112	-3.34461	-10.1626	-2.67215	0.764567	-0.0486766	1.71533	-0.44728	-0.158629	13.5868		-1.70982
20190926	0.03	-0.233555	1.25154	-3.94927	-10.2079	-2.52575	0.956789	-0.138531	1.69003	-0.436136	-0.157581	13.586		-2.93129
20190927	0.15	0.306914	1.4854	-4.947	-9.76668	-2.30737	1.14396	-0.228555	1.66447	-0.424978	-0.156532	13.5852		-3.15469
20190928	0.01	0.0109173	1.29759	-6.02102	-8.85616	-2.02396	1.3256	-0.318783	1.63866	-0.413805	-0.155483	13.5843		-4.71251
20190929	0	0.637145	-0.476037	-6.54996	-7.53161	-1.68442	1.50124	-0.409246	1.61261	-0.402619	-0.154432	13.5835		-6.38885
20190930	0.03	1.57097	-3.7651	-6.01813	-5.86135	-1.29808	1.67046	-0.499977	1.58632	-0.391419	-0.153381	13.5827		-8.21226
20191001	1.47	0.362389	-5.53211	-4.16778	-3.93063	-0.874471	1.83285	-0.591011	1.55981	-0.380206	-0.152329	13.5819		-9.3375
20191002	0.6	-10.3882	-2.59051	-1.08345	-1.8402	-0.423293	1.98804	-0.682381	1.53307	-0.368979	-0.151275	13.581		-14.0622
20191003	6.57	-15.5049	3.08796	2.65149	0.304979	0.0456741	2.13567	-0.774122	1.50612	-0.357739	-0.150222	13.5802		-9.76544
20191004	55.38	23.9494	6.80758	6.2164	2.39988	0.522636	2.27538	-0.866265	1.47897	-0.346486	-0.149167	13.5794		36.9734
20191005	38.78	1.91348	6.37807	8.80667	4.33963	0.997792	2.4068	-0.958841	1.45161	-0.33522	-0.148112	13.5785		17.0982
20191006	6.72	-31.7755	4.76181	9.90785	6.02374	1.46135	2.52958	-1.05188	1.42407	-0.323941	-0.147055	13.5777		-17.1059
20191007	71.41	32.8326	4.34285	9.39875	7.38068	1.90369	2.64336	-1.14541	1.39634	-0.312649	-0.145998	13.5769		46.5742
20191008	18.55	-17.6929	2.36561	7.5917	8.39646	2.31593	2.74779	-1.23946	1.36843	-0.301345	-0.144941	13.576		-7.73555
20191009	2.23	-28.8089	-1.57148	4.9484	9.09095	2.69026	2.8425	-1.33405	1.34035	-0.290028	-0.143882	13.5752		-25.432
20191010	8.31	-14.945	-6.35689	1.86088	9.49827	3.02056	2.92714	-1.42921	1.31211	-0.278699	-0.142823	13.5743		-19.441
20191011	39.05	20.6996	-9.53638	-1.36821	9.65667	3.30267	3.00138	-1.52496	1.28372	-0.267358	-0.141763	13.5734		9.79503
20191012	3.58	-12.5159	-8.86648	-4.44547	9.60588	3.53414	3.06489	-1.62132	1.25517	-0.256005	-0.140702	13.5726		-25.8278
20191013	4.85	-11.749	-4.67604	-7.05606	9.38685	3.71414	3.11732	-1.71831	1.22648	-0.24464	-0.13964	13.5717		-23.4811
20191014	30.62	9.85122	1.25288	-8.8677	9.03519	3.84339	3.15842	-1.81594	1.19766	-0.233264	-0.138578	13.5709		2.2364
20191015	24.5	1.92934	4.39753	-9.58112	8.57379	3.92364	3.18797	-1.91423	1.16871	-0.221876	-0.137515	13.57		-3.25424
20191016	23.07	3.80889	0.537805	-9.04775	8.01917	3.95733	3.20581	-2.01318	1.13964	-0.210476	-0.136452	13.5691		-4.70106
20191017	2.87	-9.98737	-6.73329	-7.37018	7.38389	3.94736	3.2119	-2.11279	1.11046	-0.199065	-0.135387	13.5682		-24.0908
20191018	0	-10.8619	-10.1776	-4.70194	6.67346	3.89708	3.20634	-2.21306	1.08117	-0.187643	-0.134322	13.5674		-25.7415
20191019	0	-17.9763	-5.59942	-1.27335	5.89084	3.80996	3.18937	-2.31399	1.05178	-0.17621	-0.133256	13.5665		-24.8491
20191020	12.79	-17.1115	3.45175	2.37274	5.03872	3.6894	3.16135	-2.41556	1.0223	-0.164767	-0.13219	13.5656		-11.287
20191021	35.88	-2.47269	10.5822	5.59364	4.11993	3.53882	3.12267	-2.51778	0.992736	-0.153312	-0.131123	13.5647		13.7032
20191022	73.24	32.2907	11.3272	7.76077	3.13772	3.36173	3.07377	-2.62063	0.963095	-0.141847	-0.130055	13.5638		51.3787
20191023	0.91	-31.9293	4.74345	8.45469	2.09591	3.16179	3.01512	-2.72409	0.933385	-0.130372	-0.128987	13.5629		-18.7312
20191024	1.64	-23.7744	-1.12108	7.73087	1.0015	2.94273	2.94718	-2.82814	0.903613	-0.118886	-0.127918	13.562		-17.1646
20191025	35.85	16.9355	-3.1637	5.7996	-0.130663	2.70826	2.87044	-2.93275	0.873787	-0.10739	-0.126848	13.5612		19.5714
20191026	34.72	19.8264	-2.06544	3.02541	-1.28206	2.46197	2.78539	-3.0379	0.843913	-0.0958839	-0.125778	13.5602		20.7864
20191027	21.66	9.28654	-1.06632	-0.0702555	-2.43256	2.20738	2.69254	-3.14356	0.813999	-0.0843681	-0.124707	13.5593		8.14997
20191028	0.08	-6.58569	-1.48227	-2.8581	-3.56185	1.94796	2.5924	-3.24968	0.784051	-0.0728425	-0.123635	13.5584		-10.9261
20191029	0.03	-2.36028	-2.81118	-4.79069	-4.64985	1.68707	2.48552	-3.35625	0.754078	-0.0613073	-0.122563	13.5575		-9.96215
20191030	0.21	-0.408399	-2.90737	-5.56722	-5.67609	1.42804	2.37244	-3.46323	0.724084	-0.0497627	-0.12149	13.5566		-8.88299
20191031	0.63	-0.394796	-1.23602	-5.1897	-6.61883	1.17414	2.25371	-3.57058	0.694077	-0.0382088	-0.120416	13.5557		-6.82052
20191101	1.48	-1.04156	0.615293	-3.91239	-7.45541	0.928557	2.12989	-3.67827	0.664064	-0.0266457	-0.119342	13.5548		-4.33866
20191102	7.62	3.99566	0.772326	-2.08586	-8.16415	0.694262	2.00152	-3.78628	0.634052	-0.0150735	-0.118268	13.5539		2.68213
20191103	0	-3.08463	-0.474546	-0.146929	-8.72585	0.474045	1.86918	-3.89455	0.604046	-0.00349245	-0.117193	13.5529		-3.7061
20191104	0.54	-3.59994	-0.636094	1.47875	-9.123	0.270302	1.7334	-4.00306	0.574055	0.00809737	-0.116117	13.552		-2.75728
20191105	7.26	2.46417	0.839585	2.47083	-9.33991	0.0848632	1.59476	-4.11178	0.544083	0.0196958	-0.115041	13.5511		5.77458
20191106	11.06	4.44286	1.43616	2.66004	-9.36662	-0.0811599	1.4538	-4.22066	0.514139	0.0313027	-0.113964	13.5501		8.53906
20191107	0.03	-3.39721	0.0854416	2.08621	-9.20702	-0.227369	1.31108	-4.32966	0.484229	0.042918	-0.112886	13.5492		-1.22555
20191108	0	-0.995599	-1.5359	1.07916	-8.87618	-0.353701	1.16715	-4.43876	0.454359	0.0545415	-0.111808	13.5483		-1.45234
20191109	0	0.080634	-2.10566	0.0749231	-8.39305	-0.4602	1.02252	-4.54791	0.424536	0.066173	-0.11073	13.5473		-1.9501
20191110	0.03	0.386414	-1.51135	-0.562686	-7.77603	-0.54711	0.877725	-4.65706	0.394767	0.0778125	-0.109651	13.5464		-1.68763
20191111	0	-1.45079	-0.129058	-0.644362	-7.03898	-0.615348	0.73327	-4.7662	0.365058	0.0894598	-0.108571	13.5454		-2.22421
20191112	2.68	-0.361492	0.865258	-0.161909	-6.18548	-0.666823	0.589685	-4.87526	0.335417	0.101115	-0.107491	13.5445		0.341857
20191113	9.32	5.76985	-0.193483	0.67049	-5.20849	-0.704225	0.447494	-4.98423	0.305849	0.112777	-0.10641	13.5435		6.24686
20191114	0	-1.56739	-3.27078	1.38429	-4.09975	-0.730542	0.307219	-5.09305	0.276362	0.124447	-0.105329	13.5426		-3.45388
20191115	0	-2.42395	-4.58996	1.39491	-2.85645	-0.748678	0.169373	-5.2017	0.246961	0.136124	-0.104248	13.5416		-5.619
20191116	0	-7.30212	0.356562	0.443923	-1.49002	-0.761295	0.0344575	-5.31013	0.217655	0.147808	-0.103166	13.5407		-6.50164
20191117	11.91	-3.72092	9.30147	-1.12682	-0.0381046	-0.770818	-0.0970453	-5.4183	0.188448	0.159499	-0.102083	13.5397		4.45373
20191118	29.37	10.6272	13.1959	-2.76767	1.44421	-0.779553	-0.224671	-5.52618	0.159349	0.171197	-0.101	13.5387		21.0555
20191119	0.22	-9.79284	4.56702	-3.95294	2.89609	-0.789656	-0.347971	-5.63372	0.130363	0.182902	-0.0999168	13.5378		-9.17876
20191120	0.04	2.91297	-9.39189	-4.2583	4.25604	-0.802971	-0.466514	-5.74089	0.101498	0.194613	-0.0988328	13.5368		-10.7372
20191121	0.03	8.09177	-17.0865	-3.27481	5.45939	-0.821058	-0.579881	-5.84766	0.0727597	0.206331	-0.0977484	13.5358		-12.2695
20191122	0	0.878291	-12.8063	-0.82644	6.43321	-0.845094	-0.687669	-5.95398	0.0441552	0.218055	-0.0966636	13.5348		-12.7544
20191123	0.31	-18.5213	2.89065	2.25289	7.09866	-0.87603	-0.789511	-6.05981	0.0156913	0.229785	-0.0955783	13.5338		-13.3777
20191124	54.99	19.434	17.051	4.70238	7.37894	-0.914435	-0.885091	-6.16511	-0.0126251	0.241521	-0.0944926	13.5329		41.1874
20191125	33.02	-0.327785	14.8349	5.46409	7.2101	-0.960425	-0.974126	-6.26985	-0.0407872	0.253263	-0.0934065	13.5319		19.9712
20191126	3.47	-15.6279	2.97637	4.56061	6.57425	-1.01305	-1.05638	-6.37399	-0.0687881	0.265011	-0.09232	13.5309		-8.09091
20191127	2.93	-2.20113	-7.16621	2.51991	5.53337	-1.07093	-1.13168	-6.47748	-0.096621	0.276764	-0.091233	13.5299		-6.84743
20191128	0.73	1.34967	-9.19382	-0.06023	4.18661	-1.13234	-1.19987	-6.5803	-0.124279	0.288523	-0.0901456	13.5289		-7.90437
20191129	0.21	0.606944	-5.15333	-2.47985	2.64001	-1.19543	-1.26084	-6.68239	-0.151755	0.300287	-0.0890578	13.5279		-7.02624
20191130	0.85	0.957859	-0.528762	-4.02477	1.00071	-1.25825	-1.3145	-6.78373	-0.179042	0.312056	-0.0879697	13.5269		-3.59567
20191201	1.49	1.37746	1.53278	-4.19028	-0.624892	-1.31888	-1.3608	-6.88427	-0.206133	0.323831	-0.0868811	13.5259		-1.28005
20191202	0	0.155504	1.25607	-3.01688	-2.13962	-1.37526	-1.39967	-6.98396	-0.233021	0.33561	-0.0857922	13.5249		-1.6053
20191203	0	0.0707736	0.528222	-1.13	-3.45447	-1.42515	-1.4311	-7.08276	-0.2597	0.347394	-0.0847029	13.5238		-0.531002
20191204	0.05	0.351743	0.457415	0.731589	-4.49146	-1.46627	-1.45509	-7.18061	-0.286161	0.359183	-0.0836132	13.5228		1.54075
20191205	1.35	0.28916	0.877511	2.05971	-5.19143	-1.49647	-1.47164	-7.27748	-0.312399	0.370976	-0.0825231	13.5218		3.22638
20191206	0	-1.15462	0.940407	2.63175	-5.5182	-1.51371	-1.48083	-7.3733	-0.338405	0.382774	-0.0814327	13.5208		2.41754
20191207	0	1.00037	0.442696	2.44694	-5.47286	-1.5163	-1.48275	-7.46804	-0.364173	0.394576	-0.0803419	13.5198		3.89001
20191208	0	-0.336431	0.0379001	1.66454	-5.08528	-1.50335	-1.47763	-7.56165	-0.389696	0.406382	-0.0792508	13.5187		1.36601
20191209	0	0.599843	0.341625	0.460623	-4.39455	-1.47441	-1.46582	-7.65407	-0.414965	0.418193	-0.0781594	13.5177		1.40209
20191210	0	-0.0334924	1.1763	-0.963179	-3.45167	-1.43011	-1.44771	-7.74528	-0.439974	0.430007	-0.0770676	13.5167		0.179624
20191211	0.14	-0.112931	2.04354	-2.34812	-2.31692	-1.37146	-1.42374	-7.83521	-0.464716	0.441824	-0.0759755	13.5156		-0.417508
20191212	1.16	0.408475	2.21813	-3.32273	-1.05922	-1.29944	-1.39432	-7.92384	-0.489182	0.453646	-0.0748831	13.5146		-0.696119
20191213	0.01	-0.14476	0.473495	-3.51225	0.246246	-1.21467	-1.35991	-8.01112	-0.513366	0.465471	-0.0737903	13.5136		-3.18351
20191214	0.41	0.916272	-2.93773	-2.71561	1.52266	-1.1173	-1.32097	-8.097	-0.53726	0.477299	-0.0726973	13.5125		-4.73707
20191215	0.24	1.74514	-6.08067	-0.98199	2.68761	-1.00701	-1.278	-8.18144	-0.560856	0.48913	-0.0716039	13.5115		-5.31753
20191216	0.62	-2.06849	-5.10922	1.29328	3.65078	-0.883413	-1.2315	-8.26441	-0.584147	0.500964	-0.0705102	13.5104		-5.88443
20191217	2.15	-10.4891	1.57351	3.44117	4.32044	-0.746223	-1.18199	-8.34585	-0.607125	0.512802	-0.0694163	13.5094		-5.47446
20191218	31.22	11.5261	7.89653	4.63842	4.60888	-0.595513	-1.12991	-8.42574	-0.629782	0.524642	-0.068322	13.5083		24.061
20191219	8.22	-8.46675	5.61159	4.25982	4.45839	-0.432461	-1.07576	-8.50404	-0.65211	0.536484	-0.0672275	13.5072		1.40466
20191220	2.92	-5.9112	-0.774002	2.63958	3.89345	-0.25961	-1.02	-8.58071	-0.674101	0.548329	-0.0661327	13.5062		-4.04562
20191221	3.75	1.05983	-4.54295	0.495168	2.99346	-0.0797	-0.963046	-8.65572	-0.695747	0.560177	-0.0650376	13.5051		-2.98796
20191222	0.03	0.24911	-3.90906	-1.42998	1.8494	0.104522	-0.905276	-8.72905	-0.717038	0.572026	-0.0639423	13.504		-5.08993
20191223	0.01	0.320496	-2.01208	-2.55123	0.553194	0.290204	-0.847032	-8.80065	-0.737968	0.583878	-0.0628467	13.503		-4.24281
20191224	0	0.367401	-0.734036	-2.6672	-0.796076	0.474435	-0.788629	-8.8705	-0.758527	0.595732	-0.0617509	13.5019		-3.03383
20191225	0.12	-0.0681316	0.21586	-1.97616	-2.081	0.654258	-0.730369	-8.93858	-0.778708	0.607587	-0.0606548	13.5008		-1.82844
20191226	2.73	1.39126	1.15438	-0.947668	-3.17491	0.826742	-0.672546	-9.00486	-0.798502	0.619444	-0.0595584	13.4997		1.59797
20191227	0.18	-2.18026	1.85853	-0.170881	-3.95183	0.9891	-0.615439	-9.06932	-0.817901	0.631303	-0.0584618	13.4986		-0.492615
20191228	4.08	2.23769	2.03469	-0.0898231	-4.30599	1.13865	-0.559306	-9.13193	-0.836897	0.643162	-0.057365	13.4976		4.18256
20191229	0.01	-1.00985	1.41101	-0.782829	-4.19256	1.27291	-0.504396	-9.19267	-0.855483	0.655023	-0.056268	13.4965		-0.381667
20191230	0	-0.703746	0.772712	-1.99273	-3.64977	1.38926	-0.450955	-9.25153	-0.873649	0.666886	-0.0551707	13.4954		-1.92376
20191231	0.1	0.391983	0.61017	-3.21542	-2.76389	1.4848	-0.399188	-9.30849	-0.891388	0.678749	-0.0540733	13.4943		-2.21327
20200101	0.03	0.474578	-0.332131	-3.77308	-1.63784	1.5565	-0.349245	-9.36357	-0.908691	0.690612	-0.0529756	13.4932		-3.63063
20200102	0.06	2.21233	-3.11684	-3.17629	-0.381357	1.60148	-0.301257	-9.41675	-0.925549	0.702477	-0.0518777	13.4921		-4.0808
20200103	0.4	0.687085	-5.51591	-1.34525	0.892162	1.61698	-0.255298	-9.46806	-0.941955	0.714342	-0.0507796	13.491		-6.17407
20200104	0.33	-4.39113	-3.27483	1.34485	2.06724	1.60024	-0.211363	-9.51749	-0.9579	0.726207	-0.0496814	13.4899		-6.3211
20200105	4.65	-12.1475	3.83743	4.03502	3.02917	1.54849	-0.16939	-9.56506	-0.973377	0.738072	-0.0485829	13.4888		-4.27502
20200106	36.46	13.7291	8.01452	5.62969	3.66503	1.459	-0.12929	-9.61079	-0.988378	0.749938	-0.0474843	13.4876		27.3733
20200107	3.91	-12.6409	2.29092	5.35286	3.88658	1.32991	-0.0909664	-9.65469	-1.00289	0.761803	-0.0463855	13.4865		-4.99708
20200108	17.78	9.40065	-3.80224	3.62901	3.69865	1.1626	-0.0543097	-9.69677	-1.01692	0.773668	-0.0452865	13.4854		9.22743
20200109	2.78	-1.5119	-4.35297	1.2136	3.17467	0.961757	-0.0192022	-9.73706	-1.03045	0.785532	-0.0441873	13.4843		-4.65127
20200110	0.33	-1.67517	-3.53919	-1.05846	2.40632	0.733619	0.0144755	-9.77559	-1.04347	0.797396	-0.043088	13.4832		-6.27282
20200111	0.08	0.0164678	-2.46612	-2.61348	1.48664	0.484876	0.0468452	-9.81236	-1.05597	0.809259	-0.0419886	13.482		-5.06313
20200112	0	0.0986438	-1.05697	-3.24111	0.508206	0.222361	0.0779971	-9.84742	-1.06796	0.821121	-0.040889	13.4809		-4.19943
20200113	0	-0.184215	0.0855756	-3.0947	-0.439308	-0.0470756	0.108003	-9.88077	-1.07942	0.832982	-0.0397892	13.4798		-3.19334
20200114	0.06	-0.298807	0.795414	-2.51191	-1.27602	-0.316571	0.136919	-9.91245	-1.09034	0.844841	-0.0386894	13.4786		-2.0153
20200115	1.04	0.53616	1.22072	-1.80141	-1.93611	-0.579265	0.164794	-9.94247	-1.10072	0.856699	-0.0375894	13.4775		-0.0445339
20200116	0.03	-0.330496	1.20321	-1.18943	-2.37265	-0.828411	0.191679	-9.97087	-1.11056	0.868555	-0.0364892	13.4764		-0.316715
20200117	0	-0.149738	0.846969	-0.766784	-2.57343	-1.05799	0.217636	-9.99766	-1.11984	0.880409	-0.035389	13.4752		-0.069553
20200118	0.09	0.377639	0.304693	-0.466426	-2.55734	-1.2633	0.242742	-10.0229	-1.12857	0.892261	-0.0342886	13.4741		0.215906
20200119	0.03	0.387296	-0.33712	-0.172395	-2.35991	-1.44106	0.267085	-10.0465	-1.13672	0.904111	-0.0331882	13.4729		-0.122219
20200120	0	0.648719	-0.815847	0.206975	-2.02713	-1.58897	0.29074	-10.0686	-1.14431	0.915959	-0.0320876	13.4718		0.039847
20200121	0.11	-0.382077	-0.887638	0.722183	-1.60777	-1.70537	0.31376	-10.0892	-1.15132	0.927803	-0.0309869	13.4706		-0.547531
20200122	2.3	0.805271	-0.537218	1.30057	-1.14581	-1.78917	0.336173	-10.1083	-1.15775	0.939645	-0.0298862	13.4694		1.56863
20200123	1.88	-2.35781	0.344368	1.73429	-0.68022	-1.83974	0.357981	-10.1258	-1.16358	0.951484	-0.0287853	13.4683		-0.279147
20200124	6.56	1.92005	1.37134	1.8182	-0.245746	-1.85673	0.379173	-10.1419	-1.16883	0.96332	-0.0276844	13.4671		5.10959
20200125	5.34	0.00879433	1.5382	1.45289	0.128625	-1.84027	0.399725	-10.1564	-1.17347	0.975152	-0.0265834	13.4659		2.99988
20200126	3.23	-0.0117932	0.498176	0.704877	0.42187	-1.79125	0.419584	-10.1694	-1.1775	0.986981	-0.0254824	13.4648		1.19126
20200127	0.06	-1.05023	-0.929464	-0.217459	0.621489	-1.71141	0.438705	-10.181	-1.18092	0.998805	-0.0243813	13.4636		-2.19716
20200128	0.16	0.129675	-1.67503	-1.03755	0.721535	-1.60334	0.457067	-10.191	-1.18373	1.01063	-0.0232801	13.4624		-2.5829
20200129	0.01	0.278119	-1.39089	-1.50079	0.721413	-1.47009	0.474642	-10.1995	-1.18591	1.02244	-0.0221789	13.4612		-2.61356
20200130	0	-0.129936	-0.548794	-1.46927	0.627614	-1.3149	0.491348	-10.2066	-1.18746	1.03425	-0.0210776	13.46		-2.148
20200131	2.49	-0.245096	0.527752	-0.961814	0.458157	-1.14126	0.507061	-10.2121	-1.18838	1.04606	-0.0199763	13.4589		-0.679158
20200201	2.05	-1.8261	1.52933	-0.131176	0.245183	-0.95297	0.521636	-10.2162	-1.18866	1.05786	-0.018875	13.4577		-0.427947
20200202	9.39	4.04285	1.52007	0.760143	0.0263519	-0.754095	0.534877	-10.2189	-1.1883	1.06966	-0.0177737	13.4565		6.32306
20200203	4.9	-0.382061	0.596387	1.42126	-0.160501	-0.548571	0.546547	-10.2201	-1.1873	1.08145	-0.0166723	13.4553		1.63558
20200204	0.04	-5.22586	0.329354	1.59471	-0.280206	-0.339909	0.556401	-10.2198	-1.18564	1.09323	-0.0155709	13.4541		-3.30179
20200205	4.74	-0.449302	1.57635	1.11464	-0.309424	-0.131099	0.564189	-10.2181	-1.18334	1.10501	-0.0144695	13.4529		2.24169
20200206	11.15	4.6762	2.60831	0.0334213	-0.241923	0.0756064	0.569647	-10.215	-1.18037	1.11678	-0.0133681	13.4517		7.31793
20200207	2.27	-1.68773	1.70515	-1.45835	-0.082526	0.279079	0.572472	-10.2104	-1.17675	1.12854	-0.0122667	13.4505		-1.44093
20200208	0.06	-1.66024	0.10958	-3.03166	0.154844	0.478478	0.572346	-10.2045	-1.17247	1.14029	-0.0111653	13.4493		-4.58232
20200209	0.46	0.659875	-0.840603	-4.22499	0.451476	0.672856	0.568953	-10.1972	-1.16752	1.15204	-0.0100639	13.448		-4.40572
20200210	1.05	1.79495	-2.0661	-4.42264	0.783224	0.861411	0.561994	-10.1886	-1.16191	1.16378	-0.00896259	13.4468		-4.69378
20200211	0.1	2.75936	-4.74692	-3.20132	1.1128	1.04359	0.551175	-10.1785	-1.15564	1.17551	-0.00786126	13.4456		-5.18887
20200212	0	2.09394	-7.28431	-0.69978	1.39045	1.21888	0.536232	-10.1671	-1.14871	1.18724	-0.00675996	13.4444		-5.89015
20200213	0	-4.38516	-4.67355	2.41159	1.55865	1.38656	0.516942	-10.1544	-1.14111	1.19895	-0.00565869	13.4432		-6.64712
20200214	0.37	-16.1015	4.42629	5.19219	1.56042	1.54525	0.49316	-10.1403	-1.13286	1.21066	-0.00455747	13.4419		-6.48304
20200215	41.91	17.6669	10.8498	6.55614	1.34501	1.69269	0.46484	-10.1249	-1.12396	1.22235	-0.0034563	13.4407		35.0728
20200216	0.4	-15.9543	4.47256	5.75953	0.889601	1.82541	0.432037	-10.1082	-1.1144	1.23403	-0.00235519	13.4395		-5.72226
20200217	0	-4.80647	-4.6135	3.46746	0.239966	1.93946	0.394838	-10.0901	-1.1042	1.24571	-0.00125413	13.4382		-5.95251
20200218	0	0.0169983	-7.05538	0.704351	-0.520688	2.03094	0.353363	-10.0707	-1.09336	1.25737	-0.000153139	13.437		-6.33403
20200219	0.73	1.65803	-3.99214	-1.71693	-1.30175	2.09617	0.307836	-10.05	-1.08189	1.26902	0.00094778	13.4357		-4.05104
20200220	0.25	0.388262	0.203289	-3.38543	-2.01072	2.13165	0.258564	-10.0279	-1.06979	1.28066	0.00204862	13.4345		-2.79388
20200221	2.85	1.856	2.21596	-4.17619	-2.55167	2.13443	0.205891	-10.0045	-1.05706	1.29229	0.00314938	13.4332		-0.10423
20200222	0	-0.35217	1.95698	-4.28528	-2.82941	2.10223	0.150219	-9.97966	-1.04372	1.30391	0.00425005	13.432		-2.68046
20200223	0.14	-0.177606	1.27682	-4.02062	-2.76333	2.03369	0.0919806	-9.95346	-1.02976	1.31551	0.00535063	13.4307		-2.92141
20200224	1.45	0.464414	0.958715	-3.54565	-2.32278	1.92879	0.031637	-9.92587	-1.0152	1.32711	0.00645111	13.4295		-2.12253
20200225	0.35	-1.79947	0.904093	-2.79211	-1.54406	1.78805	-0.030336	-9.89686	-1.00004	1.33868	0.00755148	13.4282		-3.68749
20200226	0.68	-2.99597	-0.0190723	-1.57544	-0.512357	1.61225	-0.093431	-9.86642	-0.984283	1.35025	0.00865173	13.427		-4.59049
20200227	9.87	6.80719	-2.66407	0.150588	0.66711	1.40247	-0.157086	-9.8345	-0.967942	1.3618	0.00975188	13.4257		4.29371
20200228	13.49	9.24383	-4.62721	2.07117	1.88835	1.16	-0.220724	-9.80108	-0.951022	1.37334	0.0108519	13.4244		6.68778
20200229	0.31	-8.71058	-3.27828	3.73913	3.04754	0.886326	-0.283787	-9.7661	-0.93353	1.38486	0.0119518	13.4231		-8.24973
20200301	0.44	-13.9907	1.54532	4.67927	4.04019	0.58377	-0.34579	-9.72952	-0.915475	1.39637	0.0130515	13.4219		-7.76612
20200302	34.15	14.409	6.69041	4.44197	4.7609	0.25652	-0.406267	-9.6913	-0.896864	1.40786	0.0141511	13.4206		25.5414
20200303	8.49	-9.13201	5.34624	2.76541	5.13472	-0.0893019	-0.4647	-9.65137	-0.877708	1.41933	0.0152506	13.4193		-1.02036
20200304	1.93	-6.89986	-0.415018	0.212591	5.14594	-0.446895	-0.520517	-9.6097	-0.858014	1.43079	0.0163499	13.418		-7.10229
20200305	0	-0.561435	-4.84549	-2.24696	4.80004	-0.809691	-0.573119	-9.56622	-0.837792	1.44224	0.0174491	13.4167		-7.65388
20200306	0	2.09327	-5.21705	-3.67623	4.10664	-1.17111	-0.621902	-9.52085	-0.817052	1.45366	0.0185481	13.4154		-6.80002
20200307	0	0.0996754	-2.61954	-3.52545	3.08425	-1.5233	-0.666258	-9.47352	-0.795802	1.46508	0.0196469	13.4141		-6.04532
20200308	0.7	-3.52908	1.03294	-1.9678	1.7759	-1.85674	-0.70558	-9.42415	-0.774052	1.47647	0.0207455	13.4129		-4.46394
20200309	11.78	5.37965	3.28731	0.495783	0.248956	-2.16011	-0.739284	-9.37266	-0.751811	1.48784	0.021844	13.4116		9.16275
20200310	0.63	-4.62547	1.65981	3.23468	-1.41722	-2.421	-0.766814	-9.31896	-0.72909	1.4992	0.0229423	13.4103		0.269014
20200311	5.66	2.22813	-0.909021	5.61123	-3.13751	-2.62718	-0.787684	-9.26295	-0.705897	1.51054	0.0240404	13.4089		6.93034
20200312	0.25	-2.48568	-1.64165	7.19373	-4.81514	-2.76783	-0.801505	-9.20451	-0.682243	1.52186	0.0251383	13.4076		3.06641
20200313	3.47	2.02829	-1.10393	7.70293	-6.34686	-2.83512	-0.807984	-9.14354	-0.658137	1.53316	0.0262359	13.4063		8.62729
20200314	0.36	-0.753659	0.00890146	7.04409	-7.63836	-2.82484	-0.806937	-9.07992	-0.633589	1.54444	0.0273334	13.405		6.29933
20200315	0	-0.197636	2.24879	5.08791	-8.57802	-2.73742	-0.798298	-9.01352	-0.608607	1.55571	0.0284307	13.4037		7.13906
20200316	0.79	0.199754	6.01943	1.71813	-9.04088	-2.57513	-0.78228	-8.94421	-0.583202	1.56695	0.0295277	13.4024		7.93731
20200317	0.74	-0.444807	10.5667	-2.9297	-8.91824	-2.34311	-0.759337	-8.87187	-0.557383	1.57817	0.0306245	13.4011		7.19219
20200318	0	-1.28309	14.9423	-8.37606	-8.13336	-2.04987	-0.730116	-8.79637	-0.531159	1.58937	0.0317211	13.3997		5.28318
20200319	0	-1.17308	17.4942	-13.6831	-6.66165	-1.70587	-0.695365	-8.71758	-0.504541	1.60055	0.0328174	13.3984		2.63802
20200320	0	2.74133	15.5729	-17.4927	-4.53543	-1.32248	-0.655907	-8.63536	-0.477537	1.61171	0.0339135	13.3971		0.821504
20200321	0.6	9.5031	6.58872	-18.4367	-1.85868	-0.91207	-0.612623	-8.54958	-0.450158	1.62285	0.0350093	13.3957		-2.3449
20200322	0.7	19.341	-9.66313	-15.6274	1.17956	-0.487603	-0.566449	-8.4601	-0.422414	1.63396	0.0361049	13.3944		-5.94952
20200323	0.18	27.9596	-29.1176	-8.90127	4.32554	-0.0621046	-0.518361	-8.36678	-0.394314	1.64506	0.0372002	13.3931		-10.0592
20200324	1.2	26.9628	-39.8194	0.913991	7.29493	0.351435	-0.469366	-8.26948	-0.365868	1.65613	0.0382953	13.3917		-11.9426
20200325	8.79	5.23201	-24.198	11.8925	9.79726	0.740059	-0.420509	-8.16806	-0.337088	1.66717	0.0393901	13.3904		-7.07352
20200326	0.33	-58.5471	18.8434	21.1125	11.5417	1.09085	-0.372856	-8.06238	-0.307983	1.6782	0.0404845	13.389		-18.5911
20200327	156.22	62.1346	48.5442	25.3949	12.2407	1.3911	-0.327468	-7.95231	-0.278565	1.6892	0.0415788	13.3877		136.074
20200328	7.35	-60.6972	26.1721	22.5527	11.7009	1.63096	-0.28538	-7.83772	-0.248843	1.70017	0.0426727	13.3863		-11.9723
20200329	10.1	-8.81997	-13.9861	14.4749	10.0657	1.81089	-0.247573	-7.71846	-0.218827	1.71113	0.0437663	13.3849		-8.33112
20200330	1.42	13.263	-33.3571	4.06326	7.60342	1.93683	-0.214959	-7.59441	-0.188529	1.72205	0.0448596	13.3836		-16.0309
20200331	0.79	23.7705	-31.0608	-5.97769	4.59394	2.01561	-0.188385	-7.46545	-0.157958	1.73296	0.0459526	13.3822		-13.268
20200401	0.21	20.6397	-17.9918	-13.7579	1.31721	2.05414	-0.168651	-7.33144	-0.127124	1.74384	0.0470453	13.3809		-11.1099
20200402	0.07	13.5303	-3.38031	-18.2504	-1.95395	2.05939	-0.15654	-7.19228	-0.0960379	1.75469	0.0481377	13.3795		-8.10033
20200403	0.33	5.86381	7.69375	-19.2082	-4.95953	2.03869	-0.15281	-7.04785	-0.0647085	1.76551	0.0492297	13.3781		-5.65061
20200404	2.1	2.91399	13.307	-16.9251	-7.46434	1.99949	-0.158203	-6.89805	-0.0331461	1.77631	0.0503214	13.3767		-0.704152
20200405	4.17	3.25136	11.8711	-11.8263	-9.30045	1.94879	-0.173442	-6.74279	-0.00136042	1.78709	0.0514128	13.3754		3.2961
20200406	0.16	1.48175	4.02706	-4.84605	-10.41	1.89189	-0.199191	-6.58197	0.0306388	1.79783	0.0525038	13.374		0.662765
20200407	0	3.20288	-5.09461	2.35021	-10.8118	1.83338	-0.236023	-6.41553	0.0628416	1.80856	0.0535945	13.3726		0.458479
20200408	1.33	-0.186652	-7.41257	7.99354	-10.5302	1.77646	-0.284379	-6.24339	0.0952381	1.81925	0.0546848	13.3712		0.394325
20200409	0	-13.5282	0.7225	10.7896	-9.54953	1.72198	-0.344536	-6.06551	0.127819	1.82991	0.0557748	13.3698		-2.01611
20200410	38.71	14.4102	11.2516	10.1391	-7.85303	1.66994	-0.416698	-5.88189	0.160573	1.84055	0.0568644	13.3684		35.8009
20200411	14.22	-7.52455	10.6361	6.07945	-5.56309	1.61916	-0.501001	-5.69254	0.193492	1.85116	0.0579536	13.367		9.19104
20200412	0	-10.3741	2.16557	0.112352	-2.89854	1.56568	-0.597502	-5.49747	0.226567	1.86174	0.0590424	13.3656		-8.09619
20200413	1.75	1.77216	-6.15382	-5.64814	-0.0989065	1.50327	-0.706149	-5.29673	0.259786	1.87229	0.0601309	13.3642		-10.0298
20200414	0.03	3.53866	-8.41775	-9.10564	2.59227	1.42512	-0.826753	-5.0904	0.293141	1.88282	0.061219	13.3628		-13.9847
20200415	0	-3.44326	-4.18392	-8.98547	4.94956	1.32548	-0.959007	-4.87853	0.326622	1.89331	0.0623066	13.3614		-16.6126
20200416	0	-16.4678	3.6073	-5.76766	6.82869	1.20052	-1.10252	-4.6612	0.360219	1.90378	0.0633939	13.36		-18.6282
20200417	44.77	20.4322	6.02722	-0.643775	8.13538	1.04815	-1.25679	-4.43851	0.393922	1.91421	0.0644807	13.3586		25.8157
20200418	43.69	18.9682	-0.273234	4.94681	8.78791	0.867523	-1.42123	-4.21054	0.427722	1.92461	0.0655672	13.3572		23.6417
20200419	0.72	-22.1287	-5.46898	9.09463	8.72432	0.65949	-1.59518	-3.97742	0.461609	1.93499	0.0666532	13.3557		-18.5031
20200420	46.54	18.5821	0.377666	10.1926	7.90699	0.426765	-1.7778	-3.73925	0.495572	1.94533	0.0677388	13.3543		29.1523
20200421	18.92	-11.9316	5.6997	8.34821	6.3892	0.174622	-1.96815	-3.49618	0.529601	1.95564	0.0688239	13.3529		2.11627
20200422	21.14	0.0135034	2.06113	4.33466	4.36415	-0.0901007	-2.16526	-3.24837	0.563686	1.96592	0.0699087	13.3515		6.4093
20200423	10.55	1.75719	-2.62526	-0.420697	2.06105	-0.360051	-2.36815	-2.99598	0.597817	1.97617	0.0709929	13.35		-1.28877
20200424	0.52	-1.71998	-3.54378	-4.39752	-0.289894	-0.627666	-2.57581	-2.73917	0.631981	1.98639	0.0720768	13.3486		-9.66127
20200425	0	0.721507	-1.31117	-6.53103	-2.4591	-0.885275	-2.78714	-2.47812	0.666169	1.99658	0.0731601	13.3471		-7.12069
20200426	0	0.681081	0.644447	-6.62718	-4.22871	-1.12524	-3.00103	-2.21301	0.70037	2.00673	0.074243	13.3457		-5.30165
20200427	0	-0.201584	0.454271	-5.20594	-5.4353	-1.34	-3.21631	-1.94401	0.734573	2.01685	0.0753254	13.3443		-4.95325
20200428	0	-0.288158	-0.0199661	-3.27165	-6.01037	-1.52226	-3.43178	-1.67133	0.768767	2.02694	0.0764074	13.3428		-3.57977
20200429	0	-3.94575	1.3456	-1.72116	-5.95573	-1.66594	-3.64619	-1.39515	0.802942	2.03699	0.0774889	13.3414		-4.3213
20200430	13.62	7.27509	2.47305	-0.797629	-5.33254	-1.76857	-3.8581	-1.11567	0.837086	2.04701	0.0785698	13.3399		8.95051
20200501	0.02	-4.65099	-0.320743	-0.301059	-4.26197	-1.83162	-4.066	-0.833083	0.87119	2.057	0.0796503	13.3385		-5.27279
20200502	0	-3.55325	-3.46119	0.268478	-2.90057	-1.85738	-4.26825	-0.5476	0.905241	2.06695	0.0807303	13.337		-6.74596
20200503	0	-8.50429	-0.393493	1.26047	-1.41513	-1.84822	-4.4631	-0.259419	0.93923	2.07687	0.0818098	13.3355		-7.63731
20200504	27.59	11.7465	3.37469	2.18956	0.0400948	-1.80663	-4.64871	0.0312573	0.973145	2.08676	0.0828888	13.3341		17.3107
20200505	1.1	-12.4022	-0.0140291	2.45475	1.32515	-1.73523	-4.82315	0.324225	1.00698	2.09661	0.0839672	13.3326		-9.96146
20200506	22.26	12.292	-4.45604	1.88073	2.31412	-1.63665	-4.98449	0.619279	1.04071	2.10642	0.0850451	13.3311		9.71666
20200507	1.97	-11.4608	-1.07973	0.576558	2.91607	-1.51348	-5.13082	0.916215	1.07434	2.1162	0.0861225	13.3297		-11.964
20200508	19.95	-0.263936	6.2158	-0.729881	3.09518	-1.36976	-5.26032	1.21483	1.10786	2.12594	0.0871994	13.3282		5.22199
20200509	30.54	10.1576	7.28294	-1.04631	2.86868	-1.21327	-5.37124	1.5149	1.14125	2.13565	0.0882757	13.3267		16.3943
20200510	0.37	-10.145	-3.60672	-0.0705451	2.32109	-1.05448	-5.46186	1.81624	1.17449	2.14532	0.0893514	13.3252		-13.8223
20200511	13.66	11.035	-12.9804	1.38468	1.59101	-0.905268	-5.53048	2.1186	1.20759	2.15496	0.0904266	13.3237		-0.560752
20200512	0.11	-11.725	-4.96789	2.34174	0.838846	-0.777859	-5.57548	2.4218	1.24053	2.16455	0.0915013	13.3222		-14.3511
20200513	18.12	-9.13848	11.0442	2.22741	0.19362	-0.684061	-5.59527	2.72559	1.27331	2.17412	0.0925753	13.3207		4.13316
20200514	46.85	15.141	17.7464	0.645081	-0.294086	-0.633087	-5.58849	3.02977	1.30589	2.18364	0.0936488	13.3193		33.5325
20200515	0.11	-15.3922	4.4204	-2.36294	-0.639429	-0.630627	-5.55407	3.3341	1.33829	2.19312	0.0947217	13.3178		-13.3348
20200516	4.26	8.92171	-12.5673	-5.32146	-0.89104	-0.679004	-5.49134	3.63837	1.37049	2.20257	0.095794	13.3163		-8.96705
20200517	3	13.7597	-17.4816	-6.37466	-1.09772	-0.778014	-5.39987	3.94234	1.40247	2.21198	0.0968657	13.3148		-10.0966
20200518	0.03	-0.133152	-8.9055	-4.2309	-1.27449	-0.925518	-5.27943	4.24578	1.43423	2.22135	0.0979369	13.3132		-13.2696
20200519	0	-19.8257	6.24521	0.00451067	-1.40366	-1.11914	-5.13002	4.54845	1.46575	2.23068	0.0990074	13.3117		-13.576
20200520	56.66	22.3767	15.2094	4.5189	-1.46108	-1.35636	-4.95193	4.8501	1.49703	2.23998	0.100077	13.3102		42.1051
20200521	22.4	-10.4634	10.9313	7.6245	-1.42414	-1.63396	-4.74566	5.15048	1.52805	2.24923	0.101147	13.3087		8.09238
20200522	0.31	-23.9688	1.40593	8.39748	-1.27727	-1.94731	-4.51184	5.44935	1.5588	2.25845	0.102215	13.3072		-14.1654
20200523	0.01	-18.8414	-3.87113	6.50786	-1.01019	-2.29027	-4.25131	5.74645	1.58928	2.26762	0.103283	13.3057		-16.2047
20200524	29.1	14.5041	-3.44107	1.95382	-0.622932	-2.65512	-3.9651	6.04154	1.61947	2.27675	0.104351	13.3041		13.0169
20200525	28.25	15.1666	0.0815263	-4.21197	-0.12126	-3.0332	-3.65437	6.33435	1.64936	2.28585	0.105417	13.3026		11.0361
20200526	0.04	-10.5509	3.40215	-10.0591	0.486765	-3.41506	-3.32034	6.62466	1.67893	2.2949	0.106483	13.3011		-17.2079
20200527	10.97	0.0230216	5.33296	-13.4861	1.19138	-3.79045	-2.96429	6.91221	1.70819	2.30391	0.107549	13.2996		-8.13012
20200528	10.18	1.18611	2.33409	-12.8783	1.96763	-4.14846	-2.58751	7.19675	1.73712	2.31288	0.108613	13.298		-9.35809
20200529	2.65	-1.73816	-9.23108	-7.7436	2.72709	-4.47764	-2.19133	7.47805	1.7657	2.32181	0.109677	13.2965		-18.7128
20200530	0	4.58675	-26.5725	0.250308	3.30899	-4.76536	-1.77711	7.75587	1.79393	2.3307	0.110741	13.2949		-21.7354
20200531	29	28.5146	-30.2315	8.49101	3.54402	-4.99869	-1.34624	8.02994	1.8218	2.33954	0.111804	13.2934		6.77418
20200601	0.08	-40.9041	3.16249	14.2655	3.29019	-5.16554	-0.900178	8.30004	1.8493	2.34835	0.112866	13.2918		-23.476
20200602	123.73	49.2991	36.3706	15.1089	2.45781	-5.25491	-0.440385	8.56592	1.8764	2.3571	0.113927	13.2903		100.779
20200603	0.61	-51.1766	20.949	9.67168	1.08295	-5.25601	0.031647	8.82733	1.90312	2.36582	0.114987	13.2887		-20.556
20200604	1.2	-8.2075	-13.0579	1.10926	-0.598866	-5.15932	0.514375	9.08403	1.92942	2.3745	0.116047	13.2872		-20.1562
20200605	0	14.5774	-29.2807	-6.13372	-2.28469	-4.95666	1.00613	9.33578	1.95531	2.38313	0.117106	13.2856		-20.837
20200606	0.36	4.03255	-15.9896	-8.61077	-3.66711	-4.64065	1.5051	9.58233	1.98077	2.39171	0.118165	13.2841		-20.5679
20200607	3.98	-18.3254	7.55487	-7.00753	-4.51814	-4.20577	2.00923	9.82344	2.00579	2.40025	0.119223	13.2825		-17.7781
20200608	54.8	21.7737	13.7747	-3.04607	-4.78791	-3.65224	2.51634	10.0589	2.03036	2.40875	0.120279	13.2809		32.5023
20200609	12.54	-14.5105	1.47707	1.31964	-4.46737	-2.99001	3.02413	10.2884	2.05447	2.41721	0.121336	13.2794		-11.7138
20200610	3.59	-17.3842	-7.89912	3.27035	-3.54254	-2.23593	3.53032	10.5117	2.07811	2.42562	0.122391	13.2778		-22.013
20200611	43.74	17.7941	-3.81275	0.824317	-2.05267	-1.40983	4.03262	10.7286	2.10127	2.43398	0.123446	13.2762		14.8056
20200612	39.57	6.78231	4.33736	-3.61887	-0.282215	-0.532011	4.52876	10.9389	2.12394	2.4423	0.1245	13.2746		7.5008
20200613	11.4	-22.3371	4.48673	-6.21525	1.34746	0.377215	5.01645	11.1422	2.1461	2.45057	0.125553	13.273		-24.0656
20200614	56.25	28.8761	-6.50265	-4.78615	2.4621	1.2975	5.49341	11.3384	2.16775	2.4588	0.126605	13.2715		17.5873
20200615	1.3	-32.6422	-6.84059	0.148309	2.96533	2.20829	5.95738	11.5272	2.18887	2.46698	0.127657	13.2699		-39.3345
20200616	9.09	-43.7927	4.64657	6.12146	2.98747	3.08984	6.4061	11.7084	2.20946	2.47511	0.128708	13.2683		-33.0247
20200617	112.76	45.8698	13.5914	9.99899	2.69444	3.92609	6.83731	11.8817	2.2295	2.4832	0.129758	13.2667		69.4602
20200618	12.33	-40.7879	-1.0549	9.36612	2.22744	4.70529	7.2487	12.0469	2.24899	2.49124	0.130807	13.2651		-32.4767
20200619	1.32	-28.9687	-18.8873	4.97595	1.68819	5.41826	7.63797	12.2038	2.26791	2.49924	0.131855	13.2635		-42.8801
20200620	50.6	22.1601	-15.2064	-1.57368	1.16796	6.05663	8.00277	12.352	2.28626	2.50718	0.132903	13.2619		5.37997
20200621	35.18	-14.8994	12.1722	-8.43851	0.755064	6.61244	8.34079	12.4914	2.30402	2.51508	0.133949	13.2603		-11.1657
20200622	71.06	13.9747	24.0534	-13.4235	0.536367	7.07953	8.64982	12.6218	2.32119	2.52293	0.134995	13.2587		24.6046
20200623	12.29	-25.6237	5.10364	-14.718	0.582369	7.45579	8.92778	12.7428	2.33775	2.53074	0.13604	13.2571		-35.238
20200624	0.11	-16.5493	-20.7888	-12.2194	0.931902	7.74155	9.17278	12.8544	2.3537	2.53849	0.137085	13.2554		-49.5575
20200625	0	-18.8636	-24.8566	-6.31013	1.53546	7.94163	9.38312	12.9562	2.36902	2.5462	0.138128	13.2538		-50.0303
20200626	0.35	-54.2386	1.82649	2.08816	2.25733	8.06432	9.55737	13.0481	2.38371	2.55385	0.13917	13.2522		-50.324
20200627	156.65	68.9785	24.7294	10.7231	2.94333	8.11934	9.69434	13.1298	2.39776	2.56146	0.140212	13.2506		104.431
20200628	21.27	-68.4939	20.1795	17.292	3.43528	8.1187	9.79302	13.2013	2.41115	2.56902	0.141253	13.2489		-31.0225
20200629	1.06	-78.0976	5.27948	20.6653	3.57869	8.07593	9.85251	13.2623	2.4239	2.57653	0.142293	13.2473		-52.1529
20200630	8.54	-62.2927	-2.23501	20.5182	3.27618	8.00429	9.87205	13.3128	2.43598	2.58399	0.143332	13.2457		-44.0095
20200701	48.1	-17.0885	-3.28826	16.9121	2.55607	7.91462	9.85106	13.3527	2.44739	2.5914	0.14437	13.244		-3.46467
20200702	113.35	56.0728	-4.19565	10.8244	1.51606	7.81331	9.7892	13.382	2.45814	2.59875	0.145407	13.2424		62.7016
20200703	1.73	-41.5501	-10.0729	3.74547	0.268053	7.70214	9.68639	13.4007	2.46821	2.60606	0.146443	13.2408		-47.8775
20200704	46.9	19.0184	-17.28	-3.02873	-1.07321	7.58038	9.54297	13.4089	2.47761	2.61332	0.147479	13.2391		-1.29032
20200705	39.12	18.4867	-17.3261	-8.52419	-2.39091	7.44687	9.35959	13.4069	2.48634	2.62053	0.148513	13.2375		-7.36359
20200706	10.54	-8.83453	-13.6517	-12.0619	-3.56197	7.30025	9.13718	13.3947	2.49441	2.62768	0.149547	13.2358		-34.5481
20200707	23.74	6.63204	-13.045	-13.1845	-4.46074	7.13872	8.87686	13.3725	2.50182	2.63479	0.150579	13.2342		-19.5975
20200708	6.4	-8.81454	-16.0519	-11.8271	-4.99988	6.96018	8.57996	13.3406	2.50857	2.64184	0.151611	13.2325		-36.6936
20200709	7.54	-5.07046	-20.5922	-8.42271	-5.16507	6.76159	8.24799	13.2992	2.51467	2.64884	0.152641	13.2308		-34.0854
20200710	19.88	7.18235	-25.1123	-3.78378	-4.97406	6.53735	7.88274	13.2484	2.52012	2.65579	0.153671	13.2292		-21.7138
20200711	37.73	23.6656	-28.1388	1.102	-4.4498	6.28052	7.48613	13.1885	2.52494	2.66269	0.1547	13.2275		-3.37122
20200712	57.76	38.5551	-26.9575	5.21571	-3.61539	5.98516	7.06027	13.1197	2.52912	2.66954	0.155728	13.2258		16.8133
20200713	44.07	13.0415	-17.7431	7.81826	-2.49435	5.64626	6.60732	13.0423	2.53267	2.67633	0.156754	13.2242		3.11673
20200714	3.13	-48.1638	1.47926	8.63708	-1.11218	5.25972	6.12955	12.9564	2.5356	2.68308	0.15778	13.2225		-38.0474
20200715	49.15	-30.0503	29.0741	7.6909	0.492145	4.82206	5.62924	12.8622	2.53791	2.68977	0.158805	13.2208		6.71473
20200716	146	46.5649	51.9868	5.12855	2.23659	4.33047	5.10868	12.76	2.53961	2.69641	0.159829	13.2191		103.68
20200717	143.31	42.9762	56.1119	1.23148	3.99299	3.78301	4.57022	12.65	2.54071	2.703	0.160852	13.2175		100.32
20200718	35.37	-41.5213	36.7507	-3.33264	5.62212	3.17838	4.01621	12.5325	2.5412	2.70954	0.161873	13.2158		-8.10329
20200719	4	-33.106	0.888782	-7.53408	6.98062	2.51553	3.44895	12.4075	2.5411	2.71602	0.162894	13.2141		-39.7513
20200720	2.38	6.46791	-37.1494	-10.2753	7.92745	1.79367	2.87075	12.2754	2.54042	2.72246	0.163914	13.2124		-40.9567
20200721	15.55	43.2611	-59.3022	-10.4651	8.32728	1.01283	2.2839	12.1364	2.53916	2.72884	0.164932	13.2107		-26.5062
20200722	8.86	29.1063	-51.8964	-7.40474	8.08613	0.175398	1.69067	11.9906	2.53732	2.73517	0.16595	13.209		-30.1949
20200723	1.39	-13.7778	-21.2155	-1.99119	7.24431	-0.711392	1.09331	11.8383	2.53492	2.74145	0.166966	13.2073		-36.9845
20200724	2.58	-53.8468	17.3245	4.21686	5.89407	-1.63647	0.494006	11.6798	2.53197	2.74767	0.167982	13.2056		-32.3055
20200725	33.2	-53.1687	45.4204	9.56707	4.1338	-2.58688	-0.105064	11.5151	2.52845	2.75385	0.168996	13.2039		1.81871
20200726	147.11	59.1075	47.4656	12.5163	2.07199	-3.54909	-0.70175	11.3446	2.5244	2.75997	0.170009	13.2022		119.089
20200727	0.21	-54.6746	18.5483	12.2937	-0.156993	-4.5096	-1.29392	11.1685	2.5198	2.76604	0.171021	13.2005		-23.8325
20200728	0.31	-17.3467	-11.6417	9.42068	-2.40116	-5.45492	-1.87946	10.9869	2.51467	2.77206	0.172032	13.1987		-19.5677
20200729	0.32	2.71102	-23.4269	4.73529	-4.51476	-6.37157	-2.45625	10.8001	2.50902	2.77803	0.173042	13.197		-15.9806
20200730	4.01	8.19367	-16.1391	-0.816534	-6.35967	-7.24608	-3.02218	10.6084	2.50285	2.78394	0.174051	13.1953		-8.76201
20200731	15.73	18.0933	-5.64562	-6.01804	-7.79658	-8.0652	-3.57514	10.4118	2.49616	2.78981	0.175059	13.1936		6.42961
20200801	3.15	4.68672	0.921522	-9.49098	-8.67774	-8.81597	-4.11301	10.2107	2.48897	2.79562	0.176065	13.1918		-3.88273
20200802	1.49	3.57956	3.71713	-10.7093	-8.87168	-9.48654	-4.6337	10.0053	2.48129	2.80138	0.177071	13.1901		-3.41261
20200803	0.27	2.70298	2.58729	-9.74911	-8.32362	-10.0685	-5.13512	9.79568	2.47311	2.80708	0.178075	13.1884		-4.45884
20200804	0.12	3.0522	-1.36489	-6.87418	-7.11567	-10.5595	-5.6153	9.58219	2.46445	2.81274	0.179078	13.1866		-5.18688
20200805	0.05	3.09288	-5.71806	-2.64475	-5.42678	-10.9609	-6.07238	9.36501	2.45531	2.81835	0.18008	13.1849		-5.26993
20200806	0.15	-2.44145	-6.2191	2.13074	-3.45451	-11.2758	-6.50465	9.14435	2.4457	2.8239	0.181081	13.1832		-6.52981
20200807	1.18	-10.9342	-0.966697	6.42372	-1.39076	-11.5075	-6.91051	8.92043	2.43562	2.8294	0.182081	13.1814		-5.47715
20200808	9.64	-16.203	7.46104	9.16492	0.579108	-11.6596	-7.28843	8.69346	2.42509	2.83485	0.183079	13.1797		0.423013
20200809	48.76	18.9004	10.3807	9.26667	2.28547	-11.7356	-7.63704	8.46366	2.41411	2.84025	0.184076	13.1779		38.5478
20200810	1.64	-17.0921	1.13728	6.4061	3.61511	-11.7396	-7.95506	8.23125	2.40268	2.8456	0.185072	13.1762		-9.54874
20200811	2.08	-4.74459	-6.58517	1.97441	4.55475	-11.6767	-8.24133	7.99644	2.39082	2.8509	0.186067	13.1744		-9.35534
20200812	1.75	-4.51645	-2.9834	-2.36118	5.12527	-11.5536	-8.49481	7.75945	2.37853	2.85614	0.187061	13.1726		-9.86103
20200813	17.29	10.5049	1.58712	-5.42441	5.35436	-11.3785	-8.7146	7.52049	2.36581	2.86134	0.188053	13.1709		6.66764
20200814	1.66	-1.85507	-0.507813	-6.45415	5.27421	-11.1602	-8.90009	7.27978	2.35268	2.86648	0.189044	13.1691		-8.81703
20200815	0.23	-0.0462986	-4.58643	-5.73712	4.92296	-10.9086	-9.05085	7.0375	2.33914	2.87158	0.190034	13.1673		-10.3699
20200816	0.03	-1.70177	-4.07282	-4.02887	4.36027	-10.6352	-9.16662	6.79385	2.32519	2.87662	0.191023	13.1656		-9.80346
20200817	4.12	-4.42432	1.77113	-2.01605	3.6602	-10.3499	-9.24737	6.54899	2.31085	2.88162	0.19201	13.1638		-4.66924
20200818	21.09	6.0633	6.74333	-0.0702065	2.89091	-10.0582	-9.29331	6.30308	2.29611	2.88656	0.192996	13.162		12.7364
20200819	7.55	-5.15973	4.51736	1.56062	2.10085	-9.7621	-9.30509	6.05625	2.281	2.89145	0.193981	13.1602		0.918242
20200820	11.13	2.20063	-1.58514	2.71534	1.31661	-9.46269	-9.28359	5.8086	2.26551	2.8963	0.194965	13.1585		3.33083
20200821	6.67	2.8766	-5.8936	3.37474	0.549948	-9.16009	-9.22983	5.56024	2.24964	2.90109	0.195947	13.1567		0.357734
20200822	1.55	-2.42099	-5.18579	3.56381	-0.184371	-8.8538	-9.14501	5.31127	2.23342	2.90583	0.196928	13.1549		-4.04298
20200823	0.23	-9.76341	1.10402	3.26975	-0.864616	-8.54213	-9.03046	5.06177	2.21684	2.91053	0.197908	13.1531		-5.38964
20200824	24.66	10.8435	6.89141	2.39023	-1.47397	-8.22275	-8.88767	4.81183	2.19991	2.91518	0.198886	13.1513		20.1251
20200825	1.14	-9.63806	4.79212	0.893332	-1.99911	-7.89266	-8.71823	4.56155	2.18263	2.91977	0.199863	13.1495		-3.95261
20200826	0	-2.47852	-0.117304	-0.996773	-2.41977	-7.54799	-8.52381	4.311	2.16502	2.92432	0.200839	13.1477		-3.5926
20200827	0	1.71079	-2.56974	-2.86972	-2.71465	-7.18411	-8.30609	4.06027	2.14708	2.92882	0.201814	13.1459		-3.72868
20200828	0	2.78582	-3.00688	-4.12333	-2.86563	-6.79631	-8.0667	3.80944	2.12882	2.93327	0.202787	13.1441		-4.34439
20200829	0.11	3.55281	-3.61048	-4.13937	-2.86411	-6.38042	-7.80725	3.55859	2.11024	2.93767	0.203759	13.1423		-4.19704
20200830	0.2	2.40743	-4.7553	-2.68623	-2.71991	-5.93372	-7.5293	3.30779	2.09135	2.94203	0.204729	13.1404		-5.03411
20200831	4.23	1.26654	-3.55711	-0.168735	-2.468	-5.45574	-7.23436	3.05714	2.07216	2.94633	0.205698	13.1386		-2.4593
20200901	0.31	-11.7061	2.54341	2.64519	-2.14969	-4.94748	-6.92385	2.80669	2.05268	2.95059	0.206666	13.1368		-6.51751
20200902	33.26	13.4983	7.58359	4.77747	-1.80544	-4.41088	-6.59919	2.55653	2.0329	2.9548	0.207632	13.135		25.8593
20200903	7.31	-10.3246	2.70761	5.37339	-1.47069	-3.84839	-6.26176	2.30674	2.01284	2.95896	0.208597	13.1332		-2.24358
20200904	6.12	-5.78769	-3.46896	4.24566	-1.16619	-3.26284	-5.91292	2.05739	1.99251	2.96308	0.209561	13.1313		-5.01099
20200905	1.92	-11.2798	0.402951	1.65061	-0.890861	-2.65712	-5.55402	1.80854	1.97191	2.96714	0.210523	13.1295		-9.22619
20200906	27.65	11.9761	5.49118	-1.55014	-0.637533	-2.03424	-5.18637	1.56029	1.95104	2.97116	0.211483	13.1277		15.9171
20200907	0.06	-9.44278	1.48552	-4.30839	-0.394933	-1.3976	-4.8113	1.31269	1.92992	2.97514	0.212443	13.1258		-12.2656
20200908	0	-2.69108	-5.41492	-5.94431	-0.150121	-0.750712	-4.43009	1.06581	1.90855	2.97906	0.213401	13.124		-14.0503
20200909	1.51	0.862534	-8.68406	-5.96948	0.108009	-0.0971698	-4.04404	0.819732	1.88694	2.98294	0.214357	13.1221		-13.791
20200910	10.7	6.41864	-7.57002	-4.18304	0.38144	0.559665	-3.65445	0.574518	1.86509	2.98678	0.215312	13.1203		-5.33442
20200911	4.4	-10.6614	-0.697856	-1.13048	0.657405	1.2167	-3.26267	0.330239	1.84301	2.99056	0.216266	13.1185		-12.4897
20200912	20.79	-6.84967	7.47351	2.23162	0.919594	1.87079	-2.87001	0.0869639	1.82071	2.9943	0.217218	13.1166		2.85545
20200913	52.63	17.3443	11.2851	4.897	1.1502	2.51873	-2.47778	-0.15524	1.79819	2.998	0.218169	13.1147		33.5264
20200914	31.35	-2.74592	8.08978	5.98776	1.32383	3.15703	-2.08726	-0.396304	1.77547	3.00165	0.219118	13.1129		11.3316
20200915	9.46	-20.0021	2.95925	5.20704	1.4097	3.78191	-1.69976	-0.63616	1.75255	3.00525	0.220066	13.111		-11.8358
20200916	43.63	19.3727	0.281141	2.94254	1.39353	4.38971	-1.31652	-0.874742	1.72942	3.0088	0.221012	13.1092		22.5964
20200917	26.57	7.13921	-3.17555	0.23547	1.26962	4.97702	-0.938818	-1.11198	1.70611	3.01232	0.221957	13.1073		4.19913
20200918	0.11	-12.5882	-8.26305	-2.01892	1.04108	5.54096	-0.567874	-1.34781	1.68262	3.01578	0.2229	13.1054		-22.8701
20200919	0	-8.94111	-11.6623	-3.08988	0.720632	6.07892	-0.204888	-1.58216	1.65896	3.0192	0.223842	13.1036		-23.6933
20200920	1.51	-13.8232	-4.09034	-2.53881	0.334447	6.58828	0.148978	-1.81496	1.63512	3.02258	0.224782	13.1017		-20.4523
20200921	7.53	-26.0474	11.614	-0.960395	-0.0815651	7.06637	0.492607	-2.04614	1.61112	3.02591	0.225721	13.0998		-15.3937
20200922	76.19	31.9061	19.5808	0.47412	-0.488324	7.51027	0.824916	-2.27564	1.58697	3.02919	0.226658	13.0979		51.961
20200923	4.83	-30.7523	10.9593	0.700537	-0.844661	7.91707	1.14488	-2.50339	1.56267	3.03243	0.227594	13.096		-19.0925
20200924	0.03	-24.1992	0.245147	-0.473837	-1.1148	8.28402	1.45154	-2.72932	1.53823	3.03563	0.228528	13.0941		-24.4279
20200925	40.4	24.2062	-4.74257	-2.88269	-1.28417	8.60845	1.74403	-2.95336	1.51365	3.03878	0.22946	13.0923		16.5809
20200926	23.2	10.1535	-4.38244	-5.75015	-1.34524	8.88796	2.02156	-3.17544	1.48894	3.04189	0.230391	13.0904		0.0208779
20200927	6.33	-5.19723	-5.42417	-7.55711	-1.28976	9.12041	2.28343	-3.39551	1.46411	3.04495	0.231321	13.0885		-18.1785
20200928	3.68	-1.73554	-12.7174	-7.15482	-1.10936	9.30388	2.52902	-3.61349	1.43917	3.04797	0.232249	13.0866		-21.6078
20200929	9.4	9.50105	-20.9933	-4.59332	-0.805144	9.43687	2.75781	-3.82933	1.41412	3.05095	0.233175	13.0847		-16.0855
20200930	0.36	-5.26771	-19.8775	-0.385375	-0.407533	9.51822	2.96947	-4.04297	1.38896	3.05388	0.2341	13.0828		-25.5306
20201001	1.58	-20.8371	-8.10998	4.55817	0.0440622	9.54682	3.16376	-4.25434	1.36371	3.05677	0.235023	13.0808		-24.3889
20201002	26.26	-19.5845	10.564	9.06295	0.508541	9.52175	3.34057	-4.46341	1.33836	3.05962	0.235944	13.0789		0.0424887
20201003	89.06	25.464	25.3027	11.8971	0.940764	9.44217	3.49987	-4.67011	1.31294	3.06242	0.236864	13.077		62.6638
20201004	78.47	13.6617	25.8087	12.0329	1.29466	9.30738	3.64173	-4.8744	1.28743	3.06518	0.237783	13.0751		51.5032
20201005	35.22	-16.6957	15.3073	9.43257	1.5364	9.11684	3.76638	-5.07624	1.26186	3.0679	0.238699	13.0732		8.04421
20201006	12.22	-19.6913	0.910904	4.92595	1.6626	8.8704	3.87417	-5.27559	1.23622	3.07057	0.239614	13.0713		-13.8545
20201007	4.44	-10.6067	-10.6292	-0.493677	1.68196	8.56829	3.96554	-5.47242	1.21053	3.0732	0.240528	13.0693		-21.7296
20201008	0.29	-2.47777	-16.3129	-5.7862	1.60451	8.21125	4.04095	-5.66669	1.18478	3.07579	0.241439	13.0674		-24.5768
20201009	2.36	4.56146	-17.5223	-9.75975	1.44063	7.80099	4.10091	-5.85838	1.15899	3.07834	0.242349	13.0655		-22.7206
20201010	0	5.10595	-17.4346	-11.2789	1.20362	7.34054	4.14595	-6.04745	1.13316	3.08084	0.243258	13.0635		-23.6076
20201011	0.21	4.70562	-18.1559	-9.75547	0.905306	6.83421	4.17662	-6.23389	1.1073	3.0833	0.244165	13.0616		-23.2058
20201012	11.33	12.7015	-17.0263	-5.80953	0.546373	6.28714	4.19346	-6.41765	1.08142	3.08573	0.24507	13.0597		-10.1344
20201013	2.42	-9.31171	-7.97762	-0.648924	0.140719	5.70501	4.19702	-6.59872	1.05551	3.08811	0.245973	13.0577		-17.9383
20201014	8.32	-21.4993	5.97579	4.45997	-0.288697	5.09377	4.18782	-6.77707	1.02959	3.09044	0.246875	13.0558		-11.0636
20201015	67.9	23.3967	17.6139	8.28233	-0.716806	4.45948	4.16643	-6.95269	1.00367	3.09274	0.247775	13.0538		49.2929
20201016	38.52	-5.15672	17.2572	9.80608	-1.11947	3.80822	4.13337	-7.12556	0.977746	3.095	0.248673	13.0519		21.9066
20201017	14.93	-18.5425	8.66926	8.98982	-1.47472	3.1461	4.08919	-7.29566	0.951829	3.09721	0.24957	13.0499		-0.883386
20201018	4.92	-15.8851	-0.810271	6.44414	-1.75929	2.47939	4.03444	-7.46299	0.925926	3.09938	0.250464	13.048		-10.2512
20201019	1.55	-9.35675	-5.38557	2.88592	-1.9577	1.81437	3.96966	-7.62755	0.900043	3.10152	0.251358	13.046		-11.8564
20201020	16.38	10.4569	-5.23842	-1.02221	-2.06162	1.15709	3.89541	-7.78931	0.874188	3.10361	0.252249	13.044		4.19626
20201021	1.19	-1.87148	-2.81179	-4.68352	-2.0669	0.51332	3.81223	-7.94829	0.848365	3.10566	0.253139	13.0421		-9.36679
20201022	0.03	-1.35958	-1.34953	-7.52013	-1.96958	-0.111471	3.72066	-8.10448	0.822583	3.10767	0.254027	13.0401		-10.2292
20201023	0	0.159313	-0.945341	-9.15876	-1.76082	-0.712037	3.62125	-8.25788	0.796847	3.10964	0.254913	13.0381		-9.94478
20201024	0	0.443294	-0.874883	-9.53227	-1.42967	-1.28343	3.51452	-8.40848	0.771165	3.11158	0.255797	13.0361		-9.96386
20201025	0	-0.424396	-0.908564	-8.74901	-0.974177	-1.82097	3.401	-8.5563	0.745543	3.11347	0.25668	13.0342		-10.082
20201026	0.2	-0.536872	-1.19716	-6.94413	-0.412815	-2.3203	3.28117	-8.70133	0.719988	3.11532	0.257561	13.0322		-8.67816
20201027	3.18	1.51232	-2.56412	-4.26266	0.213827	-2.77791	3.15552	-8.84359	0.694508	3.11713	0.25844	13.0302		-5.31446
20201028	11.12	7.91779	-4.48233	-0.958414	0.849607	-3.19074	3.02449	-8.9831	0.669108	3.1189	0.259317	13.0282		2.47704
20201029	1.75	-4.26677	-5.18705	2.54534	1.4357	-3.55613	2.88851	-9.11986	0.643796	3.12064	0.260193	13.0262		-6.90849
20201030	1.19	-10.2012	-2.73014	5.71736	1.91518	-3.87162	2.74792	-9.25391	0.618579	3.12233	0.261066	13.0242		-7.21402
20201031	6.28	-12.7953	4.03365	7.9227	2.23369	-4.13503	2.60307	-9.38526	0.593463	3.12399	0.261938	13.0222		-0.838947
20201101	39.92	15.1802	8.52281	8.40433	2.3421	-4.34475	2.45429	-9.51392	0.568455	3.12561	0.262809	13.0202		32.1074
20201102	6.16	-11.5715	3.68657	6.71875	2.21774	-4.50029	2.30187	-9.63994	0.543563	3.12718	0.263677	13.0182		-1.16615
20201103	2.07	-5.06524	-3.75561	3.63157	1.88279	-4.60237	2.14611	-9.76333	0.518793	3.12872	0.264543	13.0162		-5.18928
20201104	0.03	-0.0830224	-6.05845	0.226123	1.38104	-4.65262	1.98726	-9.88412	0.494151	3.13023	0.265408	13.0142		-5.91535
20201105	0.06	0.957173	-3.3863	-2.56495	0.759586	-4.65317	1.8256	-10.0024	0.469645	3.13169	0.266271	13.0122		-4.99409
20201106	0.38	0.876355	-0.0150599	-4.15565	0.0658703	-4.60629	1.66144	-10.1181	0.445282	3.13312	0.267132	13.0102		-3.29436
20201107	0	0.178358	1.36525	-4.39799	-0.650063	-4.51438	1.49512	-10.2313	0.421068	3.1345	0.267992	13.0082		-2.85438
20201108	0	-0.49453	1.21152	-3.64479	-1.32975	-4.38007	1.32702	-10.342	0.397009	3.13585	0.268849	13.0061		-2.9278
20201109	0	0.153522	1.02736	-2.51153	-1.90779	-4.20602	1.15752	-10.4504	0.373114	3.13717	0.269705	13.0041		-1.33065
20201110	0	-0.162957	1.17204	-1.56526	-2.32145	-3.99509	0.987076	-10.5564	0.349388	3.13844	0.270558	13.0021		-0.556181
20201111	0	0.359959	1.07323	-1.05172	-2.52596	-3.75048	0.816182	-10.6601	0.325838	3.13968	0.27141	13.0001		0.381466
20201112	0	-0.706315	0.558921	-0.94678	-2.50439	-3.47612	0.645409	-10.7615	0.30247	3.14088	0.27226	12.998		-1.09417
20201113	0	-0.495403	0.131995	-1.11971	-2.26697	-3.17687	0.47539	-10.8607	0.279291	3.14204	0.273108	12.996		-1.48312
20201114	0	0.824887	-0.147687	-1.3779	-1.84073	-2.85809	0.306794	-10.9577	0.256307	3.14317	0.273955	12.994		-0.700701
20201115	0	0.100165	-0.851158	-1.53981	-1.26751	-2.52526	0.140311	-11.0526	0.233524	3.14426	0.274799	12.9919		-2.2908
20201116	0.01	-0.0944453	-1.07118	-1.46631	-0.601813	-2.18393	-0.0233539	-11.1455	0.21095	3.14532	0.275642	12.9899		-2.63194
20201117	0.84	-2.42555	0.208687	-1.07359	0.0975429	-1.83967	-0.183486	-11.2363	0.188588	3.14634	0.276483	12.9878		-3.29045
20201118	8.77	4.32538	1.16112	-0.385595	0.776265	-1.49806	-0.339364	-11.3251	0.166447	3.14732	0.277321	12.9858		5.10091
20201119	2.71	-2.34599	-0.313134	0.502796	1.38711	-1.16467	-0.490264	-11.4119	0.14453	3.14826	0.278158	12.9837		-2.15633
20201120	4.31	-0.513392	-1.89871	1.41111	1.88882	-0.84506	-0.635474	-11.4969	0.122843	3.14917	0.278993	12.9817		-1.00099
20201121	5.39	-1.87766	-0.64832	2.1424	2.24468	-0.544753	-0.774304	-11.58	0.101393	3.15005	0.279827	12.9796		-0.383582
20201122	11.77	1.19789	1.97637	2.52569	2.42607	-0.269123	-0.906084	-11.6613	0.0801836	3.15089	0.280658	12.9775		5.69995
20201123	15.19	3.60674	2.57821	2.42151	2.42075	-0.0225754	-1.03015	-11.7408	0.0592217	3.15169	0.281487	12.9755		8.60646
20201124	5.8	-1.2503	0.154051	1.83347	2.23889	0.191658	-1.14587	-11.8186	0.0385118	3.15246	0.282314	12.9734		0.737222
20201125	2.4	-2.09477	-2.30629	0.977339	1.9125	0.372174	-1.25267	-11.8947	0.0180589	3.15319	0.28314	12.9713		-3.42372
20201126	2.1	-1.80646	-1.87554	0.0902908	1.48193	0.518893	-1.35004	-11.9691	-0.00213202	3.15389	0.283964	12.9693		-3.5917
20201127	5.87	2.20279	0.421146	-0.655967	0.990951	0.632274	-1.43755	-12.0419	-0.0220562	3.15456	0.284785	12.9672		1.96797
20201128	5.88	1.64289	1.44026	-1.14744	0.484049	0.713089	-1.51489	-12.1131	-0.0417088	3.15518	0.285605	12.9651		1.93571
20201129	0.65	-1.7514	0.507543	-1.35077	0.00203738	0.762459	-1.58188	-12.1828	-0.0610851	3.15578	0.286423	12.963		-2.59462
20201130	0.08	-0.306864	-0.579814	-1.30551	-0.421325	0.781825	-1.63846	-12.2508	-0.0801803	3.15634	0.287238	12.9609		-2.19218
20201201	0.48	0.503797	-0.572571	-1.07865	-0.76065	0.772982	-1.68468	-12.3174	-0.0989903	3.15687	0.288052	12.9589		-1.14742
20201202	0.24	-1.42374	0.204672	-0.750272	-0.9971	0.738115	-1.72069	-12.3824	-0.117512	3.15736	0.288864	12.9568		-1.96934
20201203	5.01	3.12417	0.598731	-0.406276	-1.12066	0.679811	-1.74673	-12.446	-0.135741	3.15782	0.289674	12.9547		3.31663
20201204	0.16	-1.36568	-0.166756	-0.135871	-1.13474	0.601296	-1.76307	-12.508	-0.153678	3.15824	0.290482	12.9526		-1.66831
20201205	0	-1.12779	-0.681784	0.0240395	-1.05313	0.506476	-1.77006	-12.5686	-0.171318	3.15864	0.291288	12.9505		-1.78554
20201206	0.6	-1.8639	0.482242	0.0744109	-0.898591	0.399869	-1.7681	-12.6276	-0.188659	3.15899	0.292092	12.9484		-1.30724
20201207	6.13	3.12062	1.74763	0.0690013	-0.701477	0.286294	-1.75762	-12.6852	-0.205701	3.15932	0.292894	12.9463		4.93725
20201208	2.11	-0.11991	1.08492	0.0918911	-0.495823	0.170569	-1.73911	-12.7412	-0.22244	3.15961	0.293694	12.9441		1.0569
20201209	0.04	-1.11442	-0.774614	0.215693	-0.313253	0.0573575	-1.71303	-12.7957	-0.238875	3.15987	0.294492	12.942		-1.67334
20201210	0.05	0.51409	-2.05041	0.466806	-0.178711	-0.0491247	-1.67989	-12.8487	-0.255006	3.1601	0.295288	12.9399		-1.06951
20201211	0.29	-0.265399	-1.64757	0.813764	-0.105244	-0.145409	-1.64019	-12.9	-0.27083	3.16029	0.296082	12.9378		-1.09921
20201212	0.2	-2.3116	0.290441	1.15445	-0.0993063	-0.228668	-1.59444	-12.9498	-0.286346	3.16046	0.296874	12.9357		-0.866707
20201213	8.18	3.27254	1.82822	1.35702	-0.161576	-0.296964	-1.54316	-12.9979	-0.301554	3.16059	0.297664	12.9336		6.45778
20201214	2.68	-0.965285	1.1992	1.30705	-0.28256	-0.349279	-1.48687	-13.0444	-0.316453	3.16068	0.298452	12.9314		1.54096
20201215	0.63	-0.511945	-0.35205	1.02219	-0.442681	-0.385499	-1.42609	-13.0892	-0.331042	3.16075	0.299238	12.9293		0.15819
20201216	0.24	0.242814	-0.913509	0.622136	-0.61648	-0.406042	-1.36135	-13.1323	-0.345321	3.16078	0.300022	12.9272		-0.0485591
20201217	0.02	-0.200737	-0.552081	0.221111	-0.776788	-0.411667	-1.29313	-13.1736	-0.35929	3.16079	0.300804	12.925		-0.531708
20201218	0	-0.140907	-0.218078	-0.1362	-0.894191	-0.403428	-1.22192	-13.2132	-0.372949	3.16076	0.301584	12.9229		-0.495185
20201219	0.05	-0.150594	0.14815	-0.491948	-0.94023	-0.382627	-1.14817	-13.251	-0.386298	3.1607	0.302361	12.9208		-0.494392
20201220	0	0.433461	0.60785	-0.902657	-0.892678	-0.350879	-1.07237	-13.2869	-0.399338	3.16061	0.303137	12.9186		0.138655
20201221	0	-0.465377	0.940387	-1.40173	-0.737441	-0.310073	-0.994991	-13.321	-0.412068	3.16049	0.303911	12.9165		-0.926724
20201222	0	0.277488	1.08562	-1.928	-0.472484	-0.262253	-0.916518	-13.3533	-0.42449	3.16034	0.304683	12.9143		-0.564884
20201223	0	-0.243789	0.969181	-2.28667	-0.108426	-0.209656	-0.837419	-13.3836	-0.436603	3.16015	0.305452	12.9122		-1.56128
20201224	0	0.741761	0.240285	-2.24209	0.329383	-0.154568	-0.75814	-13.4119	-0.44841	3.15994	0.30622	12.91		-1.26005
20201225	0.05	0.54269	-1.71801	-1.57789	0.801146	-0.0992339	-0.67911	-13.4382	-0.45991	3.1597	0.306985	12.9078		-2.7532
20201226	0.06	1.20346	-3.99262	-0.307967	1.25823	-0.0457444	-0.600761	-13.4625	-0.471106	3.15943	0.307748	12.9057		-3.09712
20201227	0.02	-1.19453	-3.28252	1.29159	1.65058	0.00387595	-0.52352	-13.4847	-0.481998	3.15912	0.30851	12.9035		-3.18546
20201228	0.58	-8.33665	1.80968	2.7269	1.93071	0.0477211	-0.447768	-13.5047	-0.492589	3.15879	0.309269	12.9013		-3.80006
20201229	23.17	9.34248	5.95474	3.36947	2.05583	0.0842623	-0.373837	-13.5227	-0.50288	3.15842	0.310026	12.8992		18.6667
20201230	2.52	-7.25417	2.77854	2.77743	1.99914	0.112548	-0.302052	-13.5384	-0.512873	3.15803	0.310781	12.897		-1.6982
20201231	0.6	-2.73616	-2.45616	1.33906	1.77258	0.132712	-0.23272	-13.5518	-0.522571	3.15761	0.311534	12.8948		-3.85327
20210101	0	0.442949	-3.87918	-0.314632	1.41085	0.14569	-0.166111	-13.563	-0.531977	3.15716	0.312284	12.8926		-3.75086
20210102	0	0.495957	-2.09139	-1.63799	0.953594	0.152627	-0.102443	-13.5719	-0.541091	3.15667	0.313033	12.8905		-3.23342
20210103	1.45	0.930165	-0.385056	-2.24057	0.44022	0.154734	-0.0418906	-13.5784	-0.549917	3.15616	0.313779	12.8883		-1.69546
20210104	0	-0.341461	-0.0524691	-2.05135	-0.091681	0.153351	0.0154032	-13.5826	-0.558457	3.15562	0.314524	12.8861		-2.44528
20210105	1.05	-0.0784616	0.148626	-1.33308	-0.609781	0.149921	0.0693276	-13.5843	-0.566713	3.15505	0.315266	12.8839		-1.26291
20210106	0.31	-1.39132	0.914129	-0.460601	-1.08441	0.145842	0.119776	-13.5836	-0.574687	3.15445	0.316006	12.8817		-0.937791
20210107	5.98	2.53888	1.3927	0.267414	-1.48645	0.142351	0.166613	-13.5805	-0.582382	3.15382	0.316744	12.8795		4.199
20210108	0.28	-1.15687	0.902748	0.628005	-1.79031	0.140489	0.209683	-13.5749	-0.589799	3.15317	0.31748	12.8773		0.373884
20210109	0.03	-0.946944	-0.00551914	0.563666	-1.97948	0.141329	0.24883	-13.5667	-0.596942	3.15248	0.318213	12.8751		-0.388797
20210110	0.71	0.692507	-0.28481	0.178974	-2.05107	0.1457	0.283903	-13.5561	-0.603812	3.15177	0.318945	12.8729		0.586671
20210111	0.33	-0.0313554	-0.130656	-0.301154	-2.01369	0.153778	0.314722	-13.5429	-0.610413	3.15102	0.319674	12.8707		-0.463165
20210112	0	0.647211	-0.4265	-0.649726	-1.87942	0.164979	0.341152	-13.5271	-0.616746	3.15025	0.320401	12.8685		-0.429016
20210113	0	0.0402913	-1.17746	-0.718594	-1.65749	0.177696	0.363105	-13.5088	-0.622815	3.14945	0.321126	12.8662		-1.85577
20210114	0	0.327011	-1.41684	-0.532268	-1.35647	0.18983	0.380536	-13.4879	-0.628622	3.14862	0.321849	12.864		-1.6221
20210115	0	-2.16817	-0.165184	-0.239516	-0.983425	0.19921	0.393441	-13.4644	-0.63417	3.14777	0.32257	12.8618		-2.57287
20210116	5.08	0.174574	2.01446	-0.0215881	-0.548935	0.203975	0.401839	-13.4383	-0.639462	3.14688	0.323288	12.8596		2.16745
20210117	9.81	4.89431	2.63846	-0.00131604	-0.0703825	0.202524	0.405782	-13.4096	-0.6445	3.14597	0.324004	12.8574		7.53146
20210118	0	-4.58487	0.475967	-0.161188	0.428499	0.193527	0.405355	-13.3783	-0.649288	3.14503	0.324718	12.8551		-4.27009
20210119	0.05	-0.894438	-1.48629	-0.343402	0.922431	0.175743	0.400662	-13.3444	-0.653828	3.14406	0.32543	12.8529		-2.72413
20210120	0.4	-2.31202	-1.25606	-0.350441	1.38366	0.147994	0.391815	-13.308	-0.658124	3.14306	0.32614	12.8507		-3.91853
20210121	10.35	6.93515	-1.35107	-0.0287982	1.78031	0.109249	0.378939	-13.2689	-0.662177	3.14204	0.326847	12.8484		5.55528
20210122	0.46	-2.83054	-2.50161	0.597729	2.07807	0.0587826	0.362182	-13.2272	-0.665991	3.14099	0.327552	12.8462		-4.73442
20210123	0	-4.62695	-1.96617	1.30801	2.24644	-0.00382581	0.341725	-13.183	-0.669568	3.13991	0.328255	12.8439		-5.28511
20210124	2.37	-5.76185	1.97354	1.82847	2.26268	-0.0782797	0.31777	-13.1362	-0.672911	3.1388	0.328956	12.8417		-1.95983
20210125	20.13	8.84404	4.68202	1.87254	2.11592	-0.163642	0.290519	-13.0868	-0.676022	3.13767	0.329654	12.8394		15.3986
20210126	1.91	-6.23311	2.13605	1.27713	1.81733	-0.257949	0.260189	-13.0348	-0.678905	3.1365	0.33035	12.8372		-2.81993
20210127	0.81	-1.86635	-1.73622	0.300583	1.39813	-0.358236	0.227007	-12.9803	-0.681562	3.13532	0.331044	12.8349		-3.30199
20210128	0.03	0.339117	-2.99405	-0.690219	0.899033	-0.460743	0.191194	-12.9232	-0.683995	3.1341	0.331736	12.8327		-3.34515
20210129	0	0.598126	-1.99304	-1.3893	0.362082	-0.561536	0.152959	-12.8635	-0.686208	3.13286	0.332425	12.8304		-2.78422
20210130	0	0.363096	-0.426236	-1.63856	-0.173264	-0.656704	0.112516	-12.8013	-0.688201	3.13159	0.333112	12.8281		-1.7017
20210131	1.28	1.15368	0.548555	-1.43897	-0.669948	-0.742295	0.0700827	-12.7366	-0.689979	3.13029	0.333797	12.8259		0.263267
20210201	0.91	0.0216013	0.36217	-0.90669	-1.0987	-0.814168	0.0258837	-12.6694	-0.691542	3.12897	0.33448	12.8236		-0.522919
20210202	0.05	-0.78555	0.0220676	-0.226116	-1.43926	-0.868137	-0.0198409	-12.5997	-0.692894	3.12762	0.33516	12.8213		-0.989598
20210203	0	-0.989545	0.369372	0.408732	-1.67417	-0.900098	-0.0668366	-12.5274	-0.694036	3.12624	0.335838	12.819		-0.211441
20210204	4.3	2.2773	0.716549	0.783506	-1.78473	-0.90646	-0.114847	-12.4528	-0.69497	3.12483	0.336514	12.8167		3.77735
20210205	0.76	-0.21043	0.359225	0.71587	-1.75633	-0.885139	-0.163631	-12.3757	-0.695699	3.1234	0.337188	12.8145		0.864665
20210206	0.16	-1.16496	0.0980341	0.146116	-1.59266	-0.835715	-0.212959	-12.2962	-0.696225	3.12195	0.337859	12.8122		-0.920809
20210207	0.37	1.01903	0.347797	-0.828372	-1.32009	-0.758723	-0.262624	-12.2143	-0.69655	3.12046	0.338528	12.8099		0.538459
20210208	0.43	0.122296	0.749582	-1.9423	-0.977508	-0.655265	-0.312405	-12.1301	-0.696677	3.11895	0.339194	12.8076		-1.07042
20210209	0.06	-0.703411	0.887093	-2.80565	-0.606726	-0.527024	-0.361993	-12.0436	-0.696606	3.11742	0.339858	12.8053		-2.62197
20210210	0.34	1.14787	0.394943	-3.00812	-0.249105	-0.37622	-0.411041	-11.9548	-0.696342	3.11585	0.34052	12.803		-1.46532
20210211	0	0.737792	-1.44682	-2.26003	0.060112	-0.205743	-0.459213	-11.8637	-0.695885	3.11427	0.34118	12.8007		-2.96906
20210212	0	0.88757	-4.3807	-0.531078	0.304742	-0.0194115	-0.506192	-11.7704	-0.695239	3.11265	0.341837	12.7984		-4.02421
20210213	0.55	-0.188986	-4.70023	1.76241	0.478463	0.178179	-0.551662	-11.675	-0.694406	3.11101	0.342492	12.7961		-3.12681
20210214	0.16	-10.4329	1.06229	3.92211	0.576977	0.381774	-0.595298	-11.5773	-0.693387	3.10934	0.343144	12.7938		-5.44852
20210215	28.43	11.5486	7.61957	5.06655	0.596052	0.585498	-0.636767	-11.4775	-0.692187	3.10765	0.343795	12.7915		24.2347
20210216	8.52	-6.67964	5.962	4.49118	0.537447	0.78287	-0.675736	-11.3757	-0.690808	3.10593	0.344442	12.7891		3.77354
20210217	0.1	-6.55239	-0.103418	2.43316	0.42476	0.967319	-0.711883	-11.2718	-0.689252	3.10419	0.345088	12.7868		-4.22265
20210218	0.13	-2.30316	-3.91797	-0.388165	0.294606	1.13269	-0.744888	-11.1658	-0.687521	3.10242	0.345731	12.7845		-6.60929
20210219	0	1.04516	-3.86615	-3.16359	0.187096	1.27304	-0.77443	-11.0579	-0.685619	3.10062	0.346372	12.7822		-5.98457
20210220	0	1.94197	-2.45542	-5.00079	0.143196	1.38266	-0.800197	-10.9479	-0.683549	3.0988	0.34701	12.7799		-5.51424
20210221	0	0.543667	-2.12406	-5.2321	0.196514	1.45632	-0.821894	-10.8361	-0.681311	3.09695	0.347646	12.7775		-6.81249
20210222	0	1.90537	-3.31075	-3.80069	0.341381	1.49007	-0.839238	-10.7224	-0.67891	3.09508	0.34828	12.7752		-5.20606
20210223	3.06	0.922763	-2.9603	-1.31514	0.536206	1.48135	-0.851934	-10.6069	-0.676348	3.09318	0.348911	12.7729		-3.35268
20210224	0.07	-9.09647	1.65042	1.38114	0.730758	1.42842	-0.859717	-10.4895	-0.673626	3.09126	0.34954	12.7705		-6.06492
20210225	28.01	11.0876	5.9606	3.435	0.874387	1.33004	-0.862361	-10.3704	-0.670749	3.08931	0.350166	12.7682		20.4833
20210226	12.35	-2.59205	4.25745	4.17916	0.919875	1.18573	-0.8597	-10.2496	-0.667717	3.08734	0.35079	12.7658		5.84456
20210227	0.05	-9.79423	0.151203	3.62424	0.838541	0.996467	-0.851638	-10.1272	-0.664535	3.08534	0.351412	12.7635		-6.01879
20210228	1.79	-4.75906	-1.40619	2.16293	0.641501	0.766087	-0.838098	-10.0031	-0.661205	3.08332	0.352031	12.7611		-4.00232
20210301	13.65	8.10713	-0.765583	0.333242	0.359153	0.500677	-0.818997	-9.8775	-0.65773	3.08127	0.352647	12.7588		7.67479
20210302	0.3	-3.12935	-0.185026	-1.2598	0.0251518	0.207498	-0.794254	-9.75038	-0.654112	3.07919	0.353262	12.7564		-4.57418
20210303	1.43	-0.39207	-0.664321	-2.15409	-0.327622	-0.105506	-0.763796	-9.6218	-0.650353	3.07709	0.353874	12.7541		-3.21049
20210304	0	-0.667678	-1.29605	-2.15471	-0.661439	-0.430016	-0.727554	-9.49182	-0.646457	3.07497	0.354483	12.7517		-4.11843
20210305	0.58	0.869919	-1.91237	-1.37388	-0.929009	-0.757601	-0.685465	-9.36048	-0.642426	3.07282	0.35509	12.7493		-2.41633
20210306	2.58	-0.202577	-1.31132	-0.231569	-1.08265	-1.07972	-0.637484	-9.22785	-0.638263	3.07065	0.355694	12.747		-1.74546
20210307	1.75	-3.78876	1.04747	0.73164	-1.07752	-1.38767	-0.583583	-9.09396	-0.633969	3.06845	0.356296	12.7446		-2.00965
20210308	13.29	6.12116	2.92601	0.98433	-0.876988	-1.67199	-0.523747	-8.95888	-0.629549	3.06622	0.356896	12.7422		10.0315
20210309	0	-5.1863	1.58564	0.239332	-0.483964	-1.9225	-0.45797	-8.82265	-0.625003	3.06398	0.357493	12.7398		-3.36132
20210310	3.98	2.00892	-0.542789	-1.22271	0.034452	-2.12982	-0.386265	-8.68532	-0.620336	3.0617	0.358088	12.7374		0.243422
20210311	0.12	-0.615665	-1.59587	-2.82718	0.579896	-2.28577	-0.308669	-8.54694	-0.615549	3.05941	0.35868	12.7351		-5.03872
20210312	0	0.447969	-2.33491	-3.93118	1.05149	-2.38347	-0.225244	-8.40754	-0.610645	3.05709	0.35927	12.7327		-5.81812
20210313	0	1.04473	-2.42201	-4.02475	1.35997	-2.41694	-0.1361	-8.26718	-0.605627	3.05474	0.359857	12.7303		-5.40204
20210314	0	-3.05539	-0.823062	-2.91316	1.44475	-2.38173	-0.0414213	-8.1259	-0.600497	3.05237	0.360442	12.7279		-6.79161
20210315	10.35	3.18311	1.64613	-0.811082	1.2913	-2.27597	0.0585015	-7.98374	-0.595257	3.04998	0.361024	12.7255		4.01816
20210316	10.66	-0.379923	2.07223	1.87139	0.914467	-2.10136	0.163277	-7.84073	-0.589911	3.04756	0.361604	12.7231		3.56369
20210317	5.67	-5.10127	-0.329211	4.51656	0.345503	-1.86237	0.272443	-7.69691	-0.584461	3.04512	0.362181	12.7207		-0.913921
20210318	17.16	7.56395	-2.91579	6.39929	-0.374553	-1.56523	0.385474	-7.55232	-0.578909	3.04265	0.362755	12.7183		11.0474
20210319	2.79	-9.6479	-0.252203	6.89319	-1.18875	-1.21795	0.501808	-7.40699	-0.573257	3.04016	0.363328	12.7159		-3.00692
20210320	19.88	0.53507	6.87806	5.68262	-2.01783	-0.82987	0.620871	-7.26095	-0.56751	3.03764	0.363897	12.7135		13.0957
20210321	32.22	11.3766	11.4753	2.67141	-2.76649	-0.410932	0.742084	-7.11425	-0.561668	3.03511	0.364464	12.7111		25.5233
20210322	0.97	-11.7886	7.96851	-1.79733	-3.32762	0.028521	0.86487	-6.96691	-0.555735	3.03254	0.365029	12.7086		-5.61746
20210323	0.15	-1.4597	1.06301	-6.69987	-3.59534	0.478128	0.988648	-6.81897	-0.549713	3.02996	0.365591	12.7062		-7.09656
20210324	0	8.76421	-5.05451	-10.5711	-3.46969	0.927068	1.11284	-6.67046	-0.543604	3.02735	0.36615	12.7038		-6.86138
20210325	0	13.6154	-11.3839	-11.6045	-2.87732	1.36402	1.23685	-6.52142	-0.537411	3.02471	0.366707	12.7014		-9.37305
20210326	5.24	21.6818	-18.1774	-8.88448	-1.8252	1.77717	1.36009	-6.37187	-0.531136	3.02205	0.367262	12.6989		-5.38009
20210327	0.48	9.70346	-18.8565	-3.12555	-0.43907	2.15489	1.48198	-6.22186	-0.524782	3.01937	0.367813	12.6965		-12.2786
20210328	0	-11.176	-7.06208	3.61476	1.11313	2.48562	1.60192	-6.0714	-0.518351	3.01667	0.368363	12.6941		-14.6234
20210329	0	-42.7765	17.2821	9.0366	2.65713	2.75789	1.71934	-5.92054	-0.511846	3.01394	0.368909	12.6916		-16.4577
20210330	105.79	43.2909	32.4343	11.0071	4.01957	2.9604	1.83362	-5.7693	-0.505269	3.01119	0.369453	12.6892		86.7323
20210331	0.16	-39.7266	11.2685	8.43662	5.04906	3.08203	1.94418	-5.61769	-0.498623	3.00841	0.369995	12.6868		-20.0215
20210401	30.95	25.0525	-18.4559	3.24008	5.66439	3.11242	2.05044	-5.46576	-0.491911	3.00561	0.370534	12.6843		9.83664
20210402	16.06	25.5062	-27.7304	-1.78157	5.81143	3.04435	2.15189	-5.31353	-0.485134	3.00279	0.37107	12.6819		-4.00578
20210403	13.95	19.3531	-23.1979	-3.87475	5.44678	2.87627	2.24807	-5.16101	-0.478296	2.99994	0.371604	12.6794		-7.7196
20210404	1.22	-6.22106	-10.6462	-3.06888	4.5736	2.61545	2.33859	-5.00822	-0.4714	2.99707	0.372135	12.677		-19.9362
20210405	0.8	-23.0646	5.94788	-0.671124	3.29086	2.27391	2.42316	-4.8552	-0.464447	2.99418	0.372663	12.6745		-17.7879
20210406	16.37	-21.9029	19.8022	1.84469	1.73327	1.86486	2.50155	-4.70196	-0.457441	2.99126	0.373189	12.672		-0.255981
20210407	65.72	25.6488	21.6802	3.09086	0.0494653	1.40193	2.57353	-4.54851	-0.450384	2.98832	0.373712	12.6696		50.4199
20210408	0.38	-23.5302	8.26478	2.23318	-1.60381	0.898821	2.63886	-4.39488	-0.443279	2.98535	0.374233	12.6671		-13.0322
20210409	0.03	-6.14354	-5.15131	-0.181146	-3.09058	0.369172	2.69731	-4.24108	-0.436129	2.98237	0.374751	12.6646		-11.476
20210410	6.03	9.79529	-10.4037	-3.19653	-4.29976	-0.173376	2.74868	-4.08712	-0.428936	2.97936	0.375266	12.6622		-3.80499
20210411	1.56	5.95348	-7.34884	-5.55707	-5.13203	-0.715071	2.79274	-3.93301	-0.421703	2.97632	0.375779	12.6597		-6.95243
20210412	3.07	5.06724	-4.573	-5.8652	-5.49962	-1.24216	2.82926	-3.77875	-0.414433	2.97327	0.376289	12.6572		-5.37096
20210413	5.6	6.92238	-4.95052	-3.84277	-5.36132	-1.74142	2.85805	-3.62437	-0.407129	2.97019	0.376796	12.6547		-1.87092
20210414	6.45	2.59068	-2.91344	-0.843871	-4.7401	-2.2005	2.8789	-3.46985	-0.399793	2.96709	0.377301	12.6522		-1.16663
20210415	0.37	-15.2589	5.28196	1.52902	-3.68307	-2.60875	2.89165	-3.3152	-0.392428	2.96396	0.377803	12.6497		-8.4479
20210416	38.54	15.1041	11.6232	2.20195	-2.26603	-2.95629	2.89614	-3.16044	-0.385038	2.96081	0.378302	12.6473		28.9293
20210417	0.92	-13.3017	1.51702	0.751048	-0.631817	-3.23352	2.89222	-3.00555	-0.377626	2.95764	0.378799	12.6448		-11.0336
20210418	5.25	2.9378	-9.30393	-1.42502	1.02547	-3.43151	2.87978	-2.85055	-0.370193	2.95445	0.379293	12.6423		-7.79115
20210419	0.21	-3.79703	-7.96757	-2.52218	2.50628	-3.5421	2.8588	-2.69543	-0.362744	2.95123	0.379784	12.6398		-14.2868
20210420	24.39	16.1693	-6.85177	-1.32599	3.64151	-3.55765	2.82929	-2.54018	-0.355281	2.94799	0.380273	12.6373		7.99158
20210421	5.56	-7.13875	-6.12808	2.0919	4.33397	-3.47187	2.79134	-2.38481	-0.347807	2.94473	0.380759	12.6348		-11.1749
20210422	0.11	-22.4778	-1.2549	6.00135	4.5339	-3.28106	2.74511	-2.22932	-0.340326	2.94144	0.381242	12.6323		-17.7313
20210423	6.66	-29.9742	10.7919	8.53094	4.21414	-2.98588	2.69088	-2.0737	-0.332839	2.93813	0.381723	12.6297		-10.6514
20210424	75.56	29.9648	20.4235	8.19027	3.36967	-2.59372	2.62896	-1.91796	-0.325351	2.9348	0.3822	12.6272		58.5786
20210425	4.66	-25.2351	9.56797	4.17206	2.05819	-2.11628	2.55967	-1.7621	-0.317865	2.93144	0.382676	12.6247		-11.495
20210426	10.92	4.00082	-6.76216	-1.93438	0.427908	-1.56719	2.48332	-1.60611	-0.310382	2.92807	0.383148	12.6222		-4.69572
20210427	0.17	2.96713	-9.00808	-7.89675	-1.35069	-0.96085	2.40022	-1.44999	-0.302907	2.92467	0.383618	12.6197		-13.9377
20210428	4.59	9.19929	-6.27517	-11.3462	-3.1007	-0.312365	2.31068	-1.29374	-0.295443	2.92125	0.384084	12.6171		-8.42203
20210429	0	6.53985	-8.51715	-10.4784	-4.64878	0.362721	2.21501	-1.13733	-0.287992	2.9178	0.384549	12.6146		-12.4557
20210430	0	6.0135	-11.5969	-5.83864	-5.87018	1.04867	2.11354	-0.980768	-0.280557	2.91433	0.38501	12.6121		-11.422
20210501	0	-7.60658	-5.52452	0.912516	-6.68375	1.73028	2.00657	-0.824037	-0.273143	2.91084	0.385469	12.6095		-12.2186
20210502	0.65	-28.4251	8.4508	7.65412	-7.01831	2.39306	1.89443	-0.66713	-0.265752	2.90733	0.385924	12.607		-12.3202
20210503	74.59	32.287	16.4775	12.0375	-6.80818	3.02358	1.77742	-0.510039	-0.258387	2.9038	0.386378	12.6045		60.802
20210504	1.23	-32.6575	7.39	12.2378	-6.00826	3.60942	1.65587	-0.352759	-0.251051	2.90024	0.386828	12.6019		-13.0297
20210505	49.26	27.7156	-3.53247	8.61188	-4.6503	4.13937	1.53009	-0.19528	-0.243748	2.89666	0.387275	12.5994		32.795
20210506	34.81	21.4124	-7.38664	2.37207	-2.86369	4.60329	1.40041	-0.0375961	-0.236481	2.89306	0.38772	12.5968		16.3979
20210507	1.17	-7.62695	-7.66786	-4.85514	-0.814563	4.99157	1.26715	0.120301	-0.229251	2.88944	0.388162	12.5943		-20.15
20210508	0.03	-4.78652	-7.38676	-11.3096	1.32548	5.29489	1.13065	0.278415	-0.222063	2.88579	0.388602	12.5917		-23.4829
20210509	0	-10.0476	-1.0667	-15.3201	3.39036	5.50411	0.991207	0.436753	-0.214919	2.88212	0.389038	12.5892		-26.4344
20210510	15.5	-4.38256	7.04165	-15.2537	5.23409	5.61024	0.849126	0.595317	-0.207821	2.87843	0.389472	12.5866		-12.5946
20210511	36.29	12.1395	4.19538	-10.1217	6.75386	5.60458	0.704693	0.754113	-0.200771	2.87472	0.389902	12.584		6.21313
20210512	1.35	-13.4896	-14.5595	-1.11049	7.87395	5.47956	0.558181	0.913145	-0.193773	2.87098	0.39033	12.5815		-29.1595
20210513	22.87	2.76442	-18.7824	8.78552	8.52301	5.22988	0.409824	1.07242	-0.18683	2.86723	0.390756	12.5789		-7.23245
20210514	29.89	-28.7877	11.9204	16.5112	8.62805	4.85497	0.259804	1.23195	-0.179944	2.86345	0.391178	12.5763		-0.356144
20210515	118.29	38.2206	31.5139	19.3671	8.11957	4.36044	0.108266	1.39173	-0.173118	2.85965	0.391597	12.5737		89.1015
20210516	15.09	-42.7893	13.8572	15.6851	6.97791	3.75889	-0.0446715	1.55178	-0.166354	2.85582	0.392014	12.5712		-13.247
20210517	2.06	-20.0578	-10.6332	7.55608	5.33703	3.06594	-0.198891	1.7121	-0.159656	2.85198	0.392428	12.5686		-23.1349
20210518	3.53	9.40093	-26.2419	-2.00634	3.37383	2.29828	-0.354278	1.87271	-0.153026	2.84811	0.392839	12.566		-18.8473
20210519	5.24	23.2814	-28.398	-10.1525	1.26627	1.47302	-0.510722	2.03361	-0.146468	2.84422	0.393247	12.5634		-15.2691
20210520	0.11	17.1362	-18.9687	-14.8403	-0.808453	0.607326	-0.668113	2.1948	-0.139983	2.84031	0.393652	12.5608		-16.6728
20210521	0.13	8.48213	-6.83027	-15.4944	-2.68855	-0.28161	-0.826347	2.3563	-0.133575	2.83638	0.394055	12.5582		-13.8425
20210522	4.64	4.00296	0.919563	-12.5201	-4.27521	-1.1764	-0.98532	2.51811	-0.127247	2.83243	0.394454	12.5556		-7.59755
20210523	14.14	7.62316	4.17538	-7.25078	-5.51728	-2.05945	-1.14493	2.68024	-0.121001	2.82845	0.394851	12.553		4.54776
20210524	1.78	-13.47	9.59995	-1.82544	-6.3913	-2.91385	-1.30508	2.8427	-0.114841	2.82446	0.395245	12.5504		-5.69547
20210525	14.01	-11.6151	17.437	2.10013	-6.89025	-3.72358	-1.46566	3.00548	-0.108768	2.82044	0.395636	12.5478		7.9221
20210526	46.77	17.5393	19.5758	3.87593	-7.02459	-4.47413	-1.62655	3.1686	-0.102785	2.8164	0.396024	12.5452		40.991
20210527	0.04	-17.275	9.38324	3.4922	-6.84407	-5.15268	-1.78765	3.33204	-0.0968964	2.81234	0.396409	12.5426		-4.39953
20210528	3.22	-1.05212	-3.63061	1.86296	-6.4324	-5.74833	-1.94882	3.49581	-0.0911033	2.80825	0.396791	12.54		-2.81978
20210529	5.49	11.3025	-11.6817	0.159582	-5.87976	-6.25129	-2.10993	3.65991	-0.0854088	2.80415	0.397171	12.5374		-0.219595
20210530	0.06	9.75516	-14.0258	-0.460443	-5.274	-6.65271	-2.27083	3.82432	-0.0798156	2.80002	0.397547	12.5347		-4.73111
20210531	0.02	6.60236	-12.9399	0.439693	-4.68598	-6.94483	-2.43136	3.98906	-0.0743263	2.79588	0.397921	12.5321		-5.89781
20210601	0.16	-3.23918	-5.00773	2.02649	-4.14499	-7.12234	-2.59128	4.15411	-0.0689432	2.79171	0.398291	12.5295		-6.22042
20210602	1.12	-18.6612	9.63118	3.37727	-3.65857	-7.18278	-2.75034	4.31946	-0.0636688	2.78752	0.398659	12.5269		-5.65273
20210603	49.11	19.1709	19.4109	3.73626	-3.23154	-7.12804	-2.90825	4.48511	-0.0585054	2.78331	0.399024	12.5242		42.3181
20210604	0.1	-18.3936	8.68604	2.66536	-2.87227	-6.96338	-3.06473	4.65106	-0.0534553	2.77907	0.399386	12.5216		-7.04217
20210605	0	2.16884	-11.2581	0.815821	-2.58962	-6.69562	-3.21944	4.81729	-0.0485209	2.77482	0.399744	12.519		-8.2734
20210606	0	13.0849	-21.0505	-0.905597	-2.38571	-6.33262	-3.37203	4.9838	-0.0437043	2.77055	0.4001	12.5163		-8.87123
20210607	0	4.47807	-11.9235	-1.81211	-2.25421	-5.88296	-3.52213	5.15056	-0.0390078	2.76625	0.400453	12.5137		-9.25755
20210608	0.04	-17.2927	9.4863	-2.05864	-2.17643	-5.35585	-3.66937	5.31758	-0.0344336	2.76193	0.400803	12.511		-9.86504
20210609	50.61	18.9221	23.4197	-1.9597	-2.12682	-4.76061	-3.81335	5.48483	-0.0299839	2.7576	0.40115	12.5084		40.3821
20210610	6.05	-19.7276	15.748	-1.76736	-2.0813	-4.10584	-3.95366	5.65228	-0.0256607	2.75324	0.401495	12.5057		-5.74702
20210611	4.14	-4.22822	-1.42942	-1.52308	-2.0196	-3.40005	-4.08988	5.81993	-0.0214663	2.74886	0.401836	12.5031		-7.18071
20210612	7	11.6864	-15.9093	-1.21527	-1.92426	-2.65189	-4.22156	5.98774	-0.0174027	2.74446	0.402174	12.5004		-5.43817
20210613	8.73	19.5325	-23.0844	-0.709564	-1.7805	-1.86964	-4.34826	6.15568	-0.0134719	2.74004	0.402509	12.4977		-4.26152
20210614	1.47	8.57282	-21.0904	0.0810766	-1.57806	-1.06099	-4.46952	6.3237	-0.00967598	2.73559	0.402841	12.4951		-12.4365
20210615	0.63	-4.32143	-11.4144	0.927192	-1.31676	-0.233257	-4.58488	6.49178	-0.00601661	2.73113	0.40317	12.4924		-14.8086
20210616	0.87	-21.9515	4.46302	1.51557	-1.00771	0.606564	-4.6939	6.65988	-0.00249545	2.72665	0.403496	12.4897		-15.9729
20210617	36.89	-4.49753	20.827	1.66453	-0.661876	1.45177	-4.7961	6.82793	0.000886033	2.72214	0.403819	12.4871		17.994
20210618	69.62	20.4468	28.5483	1.24778	-0.290167	2.29562	-4.89105	6.9959	0.00412639	2.71762	0.40414	12.4844		50.2429
20210619	53.2	10.9609	20.9062	0.240289	0.0954241	3.13126	-4.97828	7.16373	0.00722425	2.71307	0.404457	12.4817		32.1074
20210620	7.9	-17.0132	3.45852	-1.02541	0.486893	3.95183	-5.05736	7.33137	0.0101783	2.70851	0.404771	12.479		-14.5801
20210621	0.42	-6.50482	-14.5422	-2.13495	0.879247	4.75045	-5.12785	7.49876	0.0129871	2.70392	0.405082	12.4763		-23.182
20210622	0.03	3.0476	-25.4142	-2.67702	1.26823	5.52019	-5.18934	7.66584	0.0156496	2.69932	0.40539	12.4736		-25.0436
20210623	0	1.45866	-25.2031	-2.32872	1.64748	6.25409	-5.24139	7.83254	0.0181644	2.69469	0.405695	12.471		-26.0732
20210624	0.76	-9.20851	-15.2241	-1.17197	2.00919	6.94522	-5.28362	7.99879	0.0205306	2.69004	0.405997	12.4683		-25.6046
20210625	20.51	-7.40631	-0.574537	0.387144	2.34701	7.5862	-5.31561	8.16453	0.0227472	2.68537	0.406296	12.4656		-7.5937
20210626	45.43	1.59488	12.9809	1.88463	2.65716	8.16919	-5.337	8.32968	0.0248132	2.68068	0.406592	12.4629		16.4604
20210627	68.37	16.4938	18.8351	2.85763	2.93928	8.68589	-5.34746	8.49417	0.0267279	2.67598	0.406884	12.4602		38.1865
20210628	38.98	-8.46284	13.1517	2.96383	3.20008	9.12726	-5.34668	8.65791	0.0284905	2.67125	0.407174	12.4575		7.65265
20210629	24.71	-11.5964	2.64049	2.32053	3.45641	9.48411	-5.33441	8.82083	0.0301005	2.6665	0.407461	12.4547		-6.63539
20210630	9.93	-18.7421	-4.72403	1.20298	3.72859	9.74773	-5.31042	8.98286	0.0315572	2.66173	0.407744	12.452		-22.2631
20210701	17.45	-8.25927	-7.16835	-0.0949907	4.03967	9.9096	-5.27456	9.1439	0.0328602	2.65694	0.408025	12.4493		-15.5226
20210702	49.36	22.9387	-6.17463	-1.25394	4.41094	9.96184	-5.22676	9.30387	0.0340087	2.65213	0.408302	12.4466		15.5102
20210703	20.35	-8.61505	-3.56237	-1.92346	4.85978	9.89761	-5.167	9.46267	0.0350022	2.6473	0.408576	12.4439		-14.1009
20210704	7.87	-23.9496	-1.16846	-1.87391	5.39291	9.71161	-5.09531	9.62021	0.0358402	2.64245	0.408848	12.4412		-26.992
20210705	58.69	24.2501	-0.280704	-1.12515	6.0018	9.40063	-5.01183	9.7764	0.0365221	2.63758	0.409116	12.4384		22.8442
20210706	12.39	-23.7682	-0.303083	-0.052182	6.66912	8.96321	-4.91672	9.93112	0.0370473	2.63269	0.409381	12.4357		-24.1234
20210707	19.19	-18.5829	0.454244	0.81285	7.37049	8.4	-4.81017	10.0843	0.0374151	2.62778	0.409642	12.433		-17.3158
20210708	67.05	26.3968	2.41202	1.01696	8.06844	7.7131	-4.6924	10.2358	0.0376252	2.62285	0.409901	12.4302		29.8258
20210709	15.01	-26.8672	4.90043	0.400839	8.71275	6.90615	-4.56364	10.3855	0.0376769	2.61791	0.410157	12.4275		-21.5659
20210710	27.39	-13.9344	5.5877	-0.736388	9.25395	5.98487	-4.42411	10.5333	0.0375696	2.61294	0.410409	12.4247		-9.08305
20210711	60.76	22.6786	3.65844	-1.98333	9.64876	4.95663	-4.27401	10.6791	0.0373028	2.60795	0.410659	12.422		24.3538
20210712	57.81	27.3729	-2.23349	-2.88676	9.85553	3.83061	-4.11355	10.8227	0.036876	2.60294	0.410905	12.4193		22.2526
20210713	0.22	-20.9721	-10.9246	-2.91884	9.83172	2.61795	-3.94294	10.9641	0.0362886	2.59791	0.411148	12.4165		-34.8155
20210714	0.06	-18.845	-12.8428	-1.74981	9.53353	1.33194	-3.7624	11.1032	0.03554	2.59287	0.411388	12.4137		-33.4377
20210715	4.4	-29.5576	1.4642	0.493719	8.92043	-0.0114289	-3.57213	11.2397	0.0346296	2.5878	0.411625	12.411		-27.5996
20210716	78.32	28.0402	17.214	2.84108	7.96133	-1.39404	-3.37233	11.3737	0.033557	2.58271	0.411858	12.4082		48.0953
20210717	58.15	11.3497	15.9685	4.2365	6.65179	-2.7962	-3.16321	11.5048	0.0323214	2.57761	0.412089	12.4055		31.5548
20210718	13.92	-18.9614	4.00138	4.26879	5.03212	-4.19719	-2.94498	11.6332	0.0309223	2.57248	0.412316	12.4027		-10.6912
20210719	30.83	12.6632	-7.06898	3.19868	3.1663	-5.57587	-2.71785	11.7585	0.0293591	2.56734	0.41254	12.3999		8.79288
20210720	3.74	-5.74111	-10.8639	1.47834	1.12748	-6.91095	-2.48203	11.8807	0.0276313	2.56218	0.412761	12.3972		-15.1267
20210721	5.95	0.538693	-10.9958	-0.219458	-1.00923	-8.18068	-2.23775	11.9997	0.0257381	2.55699	0.412978	12.3944		-10.6765
20210722	1.57	-0.690026	-9.35132	-1.05772	-3.16749	-9.36263	-1.98528	12.1153	0.023679	2.55179	0.413193	12.3916		-11.0991
20210723	4.33	1.51721	-7.98354	-0.446162	-5.26159	-10.4338	-1.72486	12.2275	0.0214536	2.54657	0.413404	12.3888		-6.91249
20210724	6.88	4.59886	-7.09603	1.5942	-7.18221	-11.3712	-1.45677	12.336	0.0190612	2.54133	0.413612	12.386		-0.902971
20210725	3.54	-3.28494	-3.18858	4.38484	-8.81233	-12.1515	-1.1813	12.4408	0.0165013	2.53607	0.413817	12.3833		-2.08868
20210726	3.07	-12.905	5.12897	6.76074	-10.0361	-12.7513	-0.898803	12.5418	0.0137736	2.53079	0.414019	12.3805		-1.01526
20210727	38.23	14.4735	12.8142	7.37398	-10.7481	-13.1503	-0.609633	12.6387	0.0108777	2.52549	0.414217	12.3777		34.6616
20210728	6.44	-13.2389	10.5234	5.079	-10.8615	-13.3349	-0.314234	12.7316	0.00781384	2.52017	0.414412	12.3749		2.36345
20210729	0.91	-6.47299	4.13305	-0.276655	-10.3406	-13.3037	-0.0132327	12.8202	0.00458189	2.51484	0.414604	12.3721		-2.6166
20210730	1.22	1.214	2.41372	-8.23042	-9.26215	-13.0631	0.292526	12.9044	0.00118208	2.50948	0.414793	12.3693		-4.6027
20210731	0.04	3.81245	5.50012	-17.4888	-7.71961	-12.6236	0.602044	12.9841	-0.00238541	2.50411	0.414978	12.3665		-8.17622
20210801	0.03	7.65609	7.45667	-25.8514	-5.80016	-11.9981	0.914216	13.0592	-0.00612038	2.49871	0.415161	12.3637		-10.7387
20210802	0.17	11.7676	4.60455	-30.9616	-3.6351	-11.2014	1.22791	13.1296	-0.0100226	2.4933	0.41534	12.3609		-14.5894
20210803	4.6	20.6396	-4.34108	-30.4589	-1.40877	-10.2505	1.54198	13.1951	-0.014092	2.48787	0.415515	12.358		-14.1604
20210804	0.18	22.5486	-21.9381	-22.6012	0.702691	-9.16276	1.85528	13.2556	-0.0183281	2.48242	0.415688	12.3552		-21.9906
20210805	16.33	36.0779	-36.5864	-7.76496	2.57154	-7.95589	2.16668	13.311	-0.0227305	2.47695	0.415857	12.3524		-8.2735
20210806	10.23	-7.27543	-22.0428	11.7357	4.09252	-6.6479	2.47502	13.3611	-0.0272988	2.47146	0.416023	12.3496		-17.5825
20210807	23.51	-55.5727	16.4392	31.216	5.16358	-5.25717	2.77916	13.4058	-0.0320323	2.46596	0.416185	12.3468		-7.91754
20210808	176.03	48.7562	48.3751	45.2628	5.68319	-3.8026	3.07797	13.445	-0.0369305	2.46043	0.416345	12.3439		142.394
20210809	60.83	-37.8062	13.9314	49.5971	5.55767	-2.3039	3.3703	13.4786	-0.041993	2.45489	0.416501	12.3411		25.7223
20210810	62.72	29.9421	-47.8126	44.6462	4.76217	-0.781521	3.655	13.5064	-0.047219	2.44932	0.416654	12.3383		26.7757
20210811	21.82	2.13701	-49.7244	31.7905	3.43901	0.744477	3.93094	13.5284	-0.0526081	2.44374	0.416803	12.3354		-15.7969
20210812	12.83	-34.0282	-3.42572	12.6994	1.77509	2.25329	4.19697	13.5443	-0.0581595	2.43814	0.416949	12.3326		-24.7545
20210813	112.16	41.5469	42.6187	-8.53994	-0.0321743	3.72211	4.45191	13.5541	-0.0638725	2.43252	0.417092	12.3298		75.6257
20210814	7.83	-48.4864	47.6806	-27.6942	-1.77388	5.12687	4.6946	13.5576	-0.0697465	2.42689	0.417231	12.3269		-28.5
20210815	0.48	-18.0802	25.1598	-42.6941	-3.23582	6.4435	4.92388	13.5548	-0.0757807	2.42123	0.417367	12.3241		-35.6145
20210816	0.1	19.6154	-4.2511	-52.8978	-4.21497	7.64958	5.1386	13.5455	-0.0819744	2.41556	0.4175	12.3212		-37.5335
20210817	1.72	48.4121	-27.3893	-57.058	-4.5409	8.72592	5.3376	13.5295	-0.0883265	2.40986	0.41763	12.3184		-36.0353
20210818	14.85	67.4554	-39.1504	-53.144	-4.14416	9.65911	5.51975	13.5069	-0.094836	2.40415	0.417756	12.3155		-24.839
20210819	0.85	35.2689	-35.5519	-40.3558	-3.11743	10.4447	5.6839	13.4774	-0.101502	2.39842	0.417879	12.3126		-40.6387
20210820	1.66	-4.07622	-17.0277	-20.7961	-1.61311	11.0836	5.82888	13.4409	-0.108322	2.39268	0.417998	12.3098		-41.8999
20210821	9.67	-52.7973	14.6875	2.26706	0.187667	11.5775	5.95357	13.3975	-0.115296	2.38691	0.418114	12.3069		-35.8427
20210822	15.34	-99.3252	42.094	24.4491	2.0974	11.9289	6.05685	13.3469	-0.122421	2.38112	0.418227	12.304		-32.7821
20210823	231.59	101.18	38.2278	41.4617	3.92855	12.1399	6.13774	13.2891	-0.129696	2.37532	0.418336	12.3012		180.87
20210824	5.63	-97.1954	-0.466337	50.9754	5.49353	12.2125	6.19544	13.2242	-0.137119	2.3695	0.418442	12.2983		-46.6863
20210825	29.06	-46.7489	-30.1286	53.0897	6.61005	12.1484	6.22954	13.152	-0.144687	2.36366	0.418545	12.2954		-23.7878
20210826	144.4	73.6576	-31.6697	48.3853	7.15507	11.9493	6.24006	13.0725	-0.152398	2.35781	0.418644	12.2925		90.3732
20210827	82.88	-3.7031	-3.90351	37.6424	7.15871	11.6194	6.22735	12.9858	-0.16025	2.35193	0.41874	12.2897		30.0358
20210828	53.12	-42.9783	21.3046	22.6993	6.68409	11.1684	6.19197	12.892	-0.168241	2.34604	0.418832	12.2868		1.02564
20210829	100.4	29.8636	14.9675	5.66017	5.79286	10.6076	6.13457	12.791	-0.176367	2.34013	0.418921	12.2839		50.4913
20210830	12.41	-19.4148	-5.23266	-11.3905	4.54708	9.94799	6.05585	12.6829	-0.184626	2.3342	0.419007	12.281		-36.0379
20210831	1.84	-7.08531	-9.88197	-26.2924	3.00933	9.19963	5.95656	12.5679	-0.193016	2.32825	0.419089	12.2781		-43.2597
20210901	9.1	3.11342	-0.896177	-36.0795	1.24505	8.37232	5.83748	12.446	-0.201532	2.32229	0.419168	12.2752		-33.8622
20210902	13.99	5.73062	4.98619	-36.5494	-0.66469	7.47541	5.6995	12.3174	-0.210173	2.31631	0.419243	12.2723		-25.8326
20210903	0.67	-5.4073	-4.5054	-25.8804	-2.59491	6.51773	5.54357	12.1823	-0.218935	2.31031	0.419315	12.2694		-35.7931
20210904	22.87	12.4349	-14.5922	-8.72878	-4.34295	5.50819	5.37067	12.0406	-0.227816	2.30429	0.419384	12.2665		-10.8861
20210905	14.75	-28.7323	4.58447	9.02031	-5.68821	4.45633	5.18187	11.8927	-0.236812	2.29825	0.419449	12.2636		-15.1275
20210906	111.7	37.4275	24.4871	21.2117	-6.411	3.37274	4.97823	11.7385	-0.24592	2.2922	0.41951	12.2607		83.1263
20210907	19.17	-40.3188	9.5092	23.2859	-6.33712	2.26842	4.76085	11.5783	-0.255138	2.28613	0.419568	12.2577		-7.52372
20210908	0.11	-27.2595	-16.2685	17.4374	-5.4898	1.15386	4.53078	11.4122	-0.264463	2.28004	0.419623	12.2548		-26.0907
20210909	3.25	-4.50112	-26.1189	7.63693	-4.01295	0.0400227	4.2891	11.2404	-0.273891	2.27394	0.419674	12.2519		-22.9831
20210910	0	-11.3143	-12.3511	-2.32602	-2.09307	-1.06064	4.03689	11.0629	-0.283419	2.26781	0.419722	12.249		-25.9915
20210911	33.58	12.8373	2.01093	-9.56738	0.0707326	-2.13491	3.77522	10.88	-0.293045	2.26167	0.419766	12.246		5.28086
20210912	31.07	14.4057	1.28009	-11.9464	2.28037	-3.16941	3.50515	10.6917	-0.302765	2.25552	0.419807	12.2431		3.73944
20210913	0.06	-8.21676	-11.2402	-9.54675	4.35423	-4.15088	3.22774	10.4983	-0.312576	2.24934	0.419845	12.2402		-29.0037
20210914	1.23	-2.75303	-20.5878	-4.08071	6.1219	-5.06641	2.94403	10.2998	-0.322475	2.24315	0.419878	12.2372		-27.4215
20210915	2.98	-11.043	-17.6906	2.40728	7.43678	-5.9034	2.65504	10.0965	-0.332459	2.23694	0.419909	12.2343		-26.3264
20210916	53.92	26.7423	-9.4888	8.38252	8.18167	-6.6502	2.36177	9.88841	-0.342524	2.23071	0.419936	12.2314		25.636
20210917	57.91	12.9523	4.73537	12.8101	8.25502	-7.29704	2.06523	9.67574	-0.352668	2.22447	0.419959	12.2284		30.4978
20210918	20.96	-42.447	23.2331	14.8984	7.58064	-7.83762	1.76643	9.45864	-0.362888	2.21821	0.419979	12.2255		-4.31553
20210919	112.7	45.1847	31.7639	13.8684	6.16337	-8.26986	1.46637	9.23725	-0.37318	2.21193	0.419995	12.2225		90.8169
20210920	0.51	-42.9841	14.1837	9.40605	4.14446	-8.59327	1.16607	9.01172	-0.38354	2.20564	0.420008	12.2196		-19.3944
20210921	0.03	-10.4497	-9.75756	3.1505	1.70726	-8.80809	0.866465	8.7822	-0.393966	2.19933	0.420017	12.2166		-17.0567
20210922	0.03	9.96238	-21.2184	-2.86368	-0.960062	-8.91479	0.56853	8.54883	-0.404455	2.193	0.420023	12.2136		-14.1197
20210923	2.55	19.9912	-20.2551	-7.08201	-3.66873	-8.91386	0.273195	8.31177	-0.415002	2.18665	0.420025	12.2107		-7.34585
20210924	0.94	13.3403	-11.7882	-8.73472	-6.2354	-8.806	-0.0186406	8.07116	-0.425606	2.18029	0.420024	12.2077		-7.18266
20210925	0.01	3.3593	-0.651076	-8.25574	-8.49488	-8.59194	-0.306104	7.82716	-0.436262	2.17391	0.420019	12.2047		-5.54752
20210926	0.12	-4.83239	9.60645	-6.71449	-10.2999	-8.27279	-0.588337	7.5799	-0.446967	2.16752	0.420011	12.2018		-1.94043
20210927	10.32	-2.16141	15.9161	-5.00728	-11.5173	-7.85079	-0.8645	7.32954	-0.457719	2.16111	0.419999	12.1988		8.74738
20210928	17.36	3.90468	15.8561	-3.63896	-12.0501	-7.32953	-1.13377	7.07623	-0.468514	2.15468	0.419983	12.1958		16.1218
20210929	4.1	-2.81554	9.41134	-2.85953	-11.8664	-6.71501	-1.39535	6.82012	-0.479348	2.14823	0.419964	12.1928		3.73627
20210930	0	-1.16063	1.52831	-2.66808	-10.9998	-6.01696	-1.64852	6.56135	-0.490218	2.14177	0.419941	12.1898		-2.30041
20211001	0	2.11568	-4.52417	-2.84223	-9.53876	-5.24924	-1.89255	6.30007	-0.501122	2.13529	0.419915	12.1869		-5.25072
20211002	0	5.33004	-9.138	-2.71443	-7.59082	-4.42749	-2.12675	6.03643	-0.512056	2.1288	0.419885	12.1839		-6.52238
20211003	0	5.62905	-12.8722	-1.59723	-5.26766	-3.56753	-2.35043	5.77058	-0.523016	2.12229	0.419852	12.1809		-8.84043
20211004	0.22	0.563264	-12.811	0.488997	-2.68489	-2.68497	-2.56297	5.50266	-0.533999	2.11576	0.419815	12.1779		-11.7587
20211005	2.54	-12.1585	-4.41619	3.06958	0.0304648	-1.79529	-2.76375	5.23283	-0.545003	2.10922	0.419774	12.1749		-13.5052
20211006	4.97	-29.1716	10.4902	5.42162	2.745	-0.913968	-2.95219	4.96122	-0.556024	2.10266	0.41973	12.1719		-13.2598
20211007	81.49	33.7783	20.1982	6.70544	5.31952	-0.0564849	-3.12771	4.68799	-0.567058	2.09608	0.419682	12.1689		60.6819
20211008	8.37	-34.7571	13.1411	6.30327	7.61338	0.761656	-3.28976	4.41329	-0.578103	2.08949	0.41963	12.1659		-15.3127
20211009	0.16	-28.6591	-1.66539	4.6193	9.50013	1.52491	-3.43781	4.13726	-0.589154	2.08288	0.419575	12.1628		-25.7052
20211010	50.59	34.4304	-13.1855	2.43654	10.8896	2.2178	-3.57134	3.86004	-0.60021	2.07626	0.419516	12.1598		23.6815
20211011	19.74	5.8376	-16.0951	0.737307	11.7245	2.8252	-3.68989	3.58179	-0.611266	2.06962	0.419454	12.1568		-9.52018
20211012	1.26	-13.9198	-13.3913	0.159327	11.9795	3.33362	-3.79303	3.30265	-0.62232	2.06296	0.419388	12.1538		-27.1518
20211013	1.33	-20.6396	-7.08999	0.690312	11.671	3.73472	-3.88046	3.02277	-0.633368	2.05629	0.419318	12.1508		-27.0393
20211014	8.06	-27.9578	5.70266	2.04236	10.8446	4.02811	-3.952	2.74228	-0.644407	2.0496	0.419245	12.1477		-20.2128
20211015	73.64	27.4582	16.9329	3.49102	9.56371	4.21881	-4.00769	2.46135	-0.655433	2.0429	0.419168	12.1447		47.8821
20211016	52.07	6.68013	15.9766	4.26092	7.90297	4.3139	-4.04776	2.1801	-0.666444	2.03618	0.419087	12.1417		26.9176
20211017	25.99	-6.14767	6.88618	3.93891	5.95178	4.32099	-4.0726	1.89868	-0.677436	2.02945	0.419003	12.1387		4.67742
20211018	0.39	-18.6792	-2.89102	2.63787	3.81724	4.24788	-4.08267	1.61725	-0.688406	2.0227	0.418915	12.1356		-18.9323
20211019	3.39	-6.2327	-7.79566	0.589192	1.61785	4.10258	-4.07848	1.33595	-0.69935	2.01593	0.418824	12.1326		-13.4392
20211020	15.92	10.7612	-7.1686	-1.87384	-0.527385	3.89323	-4.06062	1.05492	-0.710266	2.00915	0.418728	12.1295		1.71877
20211021	2.65	-1.61981	-3.38224	-4.12742	-2.5038	3.62801	-4.02969	0.774303	-0.72115	2.00235	0.418629	12.1265		-9.12947
20211022	3.97	1.64104	-1.55991	-5.47875	-4.20405	3.31524	-3.98636	0.494253	-0.731999	1.99554	0.418526	12.1234		-5.39762
20211023	0.01	0.0679889	-1.21584	-5.7175	-5.53977	2.96336	-3.93132	0.214914	-0.74281	1.98871	0.41842	12.1204		-6.86536
20211024	0	-0.499843	-0.434848	-5.01063	-6.46341	2.58093	-3.86531	-0.0635687	-0.753579	1.98187	0.41831	12.1173		-5.94533
20211025	0.03	-2.04729	1.14543	-3.72573	-6.9668	2.17686	-3.78912	-0.341049	-0.764304	1.97501	0.418196	12.1143		-4.62758
20211026	8.63	3.97099	2.46133	-2.2601	-7.06777	1.7603	-3.70355	-0.617382	-0.77498	1.96813	0.418079	12.1112		4.17222
20211027	0.58	-3.41081	1.25819	-0.949173	-6.80509	1.34055	-3.60943	-0.892421	-0.785605	1.96124	0.417957	12.1081		-3.1018
20211028	0.78	-0.394419	-1.47846	0.0676485	-6.24381	0.927033	-3.50758	-1.16602	-0.796175	1.95434	0.417832	12.1051		-1.80523
20211029	5.62	3.99004	-2.92676	0.771498	-5.4637	0.5295	-3.39884	-1.43803	-0.806688	1.94742	0.417704	12.102		1.83478
20211030	0.03	-4.67502	-0.605447	1.18503	-4.54753	0.158236	-3.28405	-1.70831	-0.81714	1.94049	0.417571	12.0989		-4.09544
20211031	5.16	-5.28994	4.11198	1.39563	-3.58285	-0.176385	-3.16404	-1.97671	-0.827527	1.93354	0.417435	12.0959		0.217661
20211101	21.64	8.6368	6.11594	1.56746	-2.66168	-0.463983	-3.03965	-2.24309	-0.837847	1.92657	0.417295	12.0928		16.3202
20211102	2.12	-6.16656	0.840694	1.85597	-1.87217	-0.694173	-2.91172	-2.50732	-0.848096	1.91959	0.417151	12.0897		-3.46989
20211103	2.16	-0.375826	-6.41998	2.40306	-1.28082	-0.857077	-2.78108	-2.76924	-0.858271	1.9126	0.417004	12.0866		-4.39274
20211104	0.93	-1.16393	-7.51724	3.29284	-0.923289	-0.945937	-2.64853	-3.02872	-0.868369	1.90559	0.416853	12.0835		-5.38833
20211105	0.07	-9.95183	-1.20486	4.3624	-0.797076	-0.95951	-2.51478	-3.28562	-0.878386	1.89857	0.416698	12.0804		-6.7943
20211106	16.34	-0.289033	6.14723	5.08689	-0.874076	-0.902489	-2.38047	-3.53981	-0.88832	1.89153	0.416539	12.0773		10.9451
20211107	30.84	12.0676	8.11849	4.87781	-1.10711	-0.784196	-2.24621	-3.79114	-0.898167	1.88447	0.416376	12.0742		25.0639
20211108	0	-10.7607	2.21809	3.4294	-1.43323	-0.616692	-2.11257	-4.0395	-0.907923	1.87741	0.41621	12.0711		-5.11317
20211109	0	-2.57922	-3.46861	1.20978	-1.76965	-0.412591	-1.98009	-4.28475	-0.917586	1.87032	0.41604	12.068		-4.83805
20211110	0	0.133545	-4.16089	-1.14592	-2.03297	-0.184396	-1.84927	-4.52678	-0.927153	1.86323	0.415866	12.0649		-5.17326
20211111	1.49	2.50434	-2.3198	-3.15589	-2.142	0.0556451	-1.72056	-4.76546	-0.936619	1.85612	0.415688	12.0618		-2.97135
20211112	0.66	0.9596	-1.16166	-4.49598	-2.02489	0.295751	-1.5944	-5.00068	-0.945982	1.84899	0.415507	12.0587		-4.69804
20211113	0	0.792572	-1.44145	-5.1053	-1.62855	0.525389	-1.47121	-5.23233	-0.955239	1.84185	0.415321	12.0556		-5.75418
20211114	0.03	-0.45461	-1.11529	-5.27545	-0.92483	0.7363	-1.35139	-5.46031	-0.964386	1.8347	0.415132	12.0525		-6.84535
20211115	0.17	-2.79076	1.13064	-5.16279	0.0693049	0.922573	-1.23532	-5.68452	-0.97342	1.82753	0.414939	12.0494		-6.82292
20211116	14.7	7.87942	2.61482	-4.39852	1.26022	1.07952	-1.12338	-5.90486	-0.982339	1.82034	0.414742	12.0462		6.09572
20211117	5.18	-0.92424	-1.61795	-2.59355	2.5052	1.20343	-1.01592	-6.12127	-0.991137	1.81315	0.414542	12.0431		-5.13574
20211118	0.05	-3.2313	-8.52288	0.0982361	3.65782	1.29086	-0.913291	-6.33364	-0.999813	1.80594	0.414337	12.04		-11.6559
20211119	0.03	-6.74889	-8.26253	3.249	4.5903	1.33842	-0.815799	-6.54192	-1.00836	1.79871	0.414129	12.0368		-11.7624
20211120	1.52	-20.3219	3.26229	6.09026	5.1898	1.34271	-0.723685	-6.74602	-1.01678	1.79147	0.413917	12.0337		-10.9694
20211121	56.21	22.1056	14.0598	7.45405	5.35567	1.30053	-0.637112	-6.94588	-1.02507	1.78422	0.413701	12.0306		43.6194
20211122	7.82	-20.2333	9.78434	6.45181	5.0318	1.21083	-0.556153	-7.14145	-1.03323	1.77695	0.413481	12.0274		-3.99719
20211123	0.31	-12.1254	-1.44236	3.72039	4.26991	1.07761	-0.480745	-7.33269	-1.04124	1.76967	0.413257	12.0243		-9.84739
20211124	0	0.222839	-9.22683	0.357331	3.18147	0.908509	-0.410724	-7.51954	-1.04911	1.76238	0.413029	12.0211		-8.64666
20211125	0.01	4.48936	-9.53607	-2.61789	1.88729	0.712289	-0.345884	-7.70197	-1.05684	1.75507	0.412798	12.018		-7.66461
20211126	0.02	3.54936	-5.02592	-4.47183	0.507049	0.4978	-0.285994	-7.87995	-1.06442	1.74775	0.412563	12.0148		-5.94839
20211127	0.65	1.56724	0.0850102	-4.93377	-0.848041	0.273879	-0.230801	-8.05346	-1.07184	1.74042	0.412323	12.0117		-3.28152
20211128	0.1	-2.06495	3.66615	-4.20315	-2.08392	0.0493459	-0.180031	-8.22245	-1.07912	1.73307	0.41208	12.0085		-2.60194
20211129	4.69	2.32798	4.82379	-2.79634	-3.11784	-0.166993	-0.133394	-8.38693	-1.08623	1.72571	0.411833	12.0054		4.35543
20211130	0.05	-1.67742	3.23914	-1.2704	-3.87502	-0.36651	-0.0905806	-8.54688	-1.09319	1.71833	0.411582	12.0022		0.291319
20211201	0	-0.638954	1.06562	-0.117283	-4.30013	-0.541314	-0.0512676	-8.7023	-1.09998	1.71094	0.411327	11.999		0.309386
20211202	0.03	0.651434	0.150043	0.361404	-4.36387	-0.685034	-0.0151084	-8.85318	-1.1066	1.70354	0.411068	11.9959		1.16288
20211203	0	-0.124338	0.357708	0.175982	-4.07274	-0.794033	0.0182654	-8.99954	-1.11305	1.69612	0.410806	11.9927		0.409353
20211204	0	0.171608	0.592445	-0.446989	-3.47592	-0.86833	0.0492395	-9.14138	-1.11934	1.6887	0.410539	11.9895		0.317064
20211205	0	-0.115082	0.462885	-1.20596	-2.6479	-0.91053	0.0782118	-9.27871	-1.12544	1.68125	0.410268	11.9863		-0.858157
20211206	0.02	0.360228	0.0922804	-1.74676	-1.67887	-0.924044	0.105566	-9.41156	-1.13137	1.6738	0.409994	11.9831		-1.29426
20211207	0.38	0.968033	-1.00267	-1.75179	-0.661995	-0.912472	0.131663	-9.53995	-1.13712	1.66633	0.409715	11.98		-1.78642
20211208	0.03	0.188447	-2.53315	-1.07609	0.321241	-0.879458	0.156822	-9.66389	-1.14268	1.65885	0.409433	11.9768		-3.42079
20211209	0	-0.698478	-2.67402	0.168051	1.2075	-0.828578	0.181339	-9.78342	-1.14806	1.65135	0.409147	11.9736		-3.20444
20211210	0.44	-6.24164	0.257431	1.60435	1.94942	-0.763413	0.205495	-9.89855	-1.15325	1.64385	0.408856	11.9704		-4.37986
20211211	13.68	1.68271	4.06649	2.75885	2.50461	-0.68756	0.229527	-10.0093	-1.15824	1.63633	0.408562	11.9672		8.50806
20211212	21.84	9.02733	4.45597	3.19404	2.83728	-0.604645	0.25362	-10.1157	-1.16305	1.6288	0.408264	11.964		16.6773
20211213	0.04	-8.15169	-0.0757973	2.7638	2.93184	-0.518049	0.277936	-10.2178	-1.16765	1.62125	0.407962	11.9608		-5.46369
20211214	0	-3.90249	-3.82697	1.76195	2.80636	-0.431157	0.302625	-10.3155	-1.17206	1.61369	0.407655	11.9576		-5.96751
20211215	0.29	-1.91199	-2.80361	0.548738	2.50285	-0.34725	0.327841	-10.409	-1.17626	1.60612	0.407345	11.9544		-4.16686
20211216	7.48	3.87289	0.210331	-0.637122	2.07495	-0.269514	0.353737	-10.4981	-1.18025	1.59854	0.407031	11.9512		3.4461
20211217	6.66	2.25778	1.55928	-1.58298	1.57789	-0.200989	0.380436	-10.583	-1.18404	1.59094	0.406713	11.9479		2.23407
20211218	0.88	-1.58138	0.82462	-2.15497	1.06539	-0.144468	0.408032	-10.6637	-1.18762	1.58333	0.406391	11.9447		-2.91173
20211219	0.03	-0.501508	-0.305666	-2.33902	0.587142	-0.102459	0.436598	-10.7401	-1.19098	1.57571	0.406064	11.9415		-3.1462
20211220	0.03	-0.109177	-0.807465	-2.17032	0.179095	-0.0772658	0.46619	-10.8122	-1.19413	1.56808	0.405734	11.9383		-3.08696
20211221	0	0.439039	-0.952169	-1.62302	-0.142199	-0.0708667	0.496823	-10.8801	-1.19706	1.56043	0.4054	11.9351		-2.13615
20211222	0.02	-0.246828	-1.03161	-0.708924	-0.374183	-0.0848109	0.528484	-10.9438	-1.19977	1.55277	0.405062	11.9318		-1.98736
20211223	0	-1.23536	-0.727045	0.415149	-0.52046	-0.119839	0.561093	-11.0033	-1.20225	1.5451	0.404719	11.9286		-1.54725
20211224	5.36	2.36476	0.299632	1.46218	-0.588872	-0.175429	0.594493	-11.0584	-1.20451	1.53742	0.404373	11.9254		4.12657
20211225	1.69	-3.88375	1.67437	2.14742	-0.591896	-0.249237	0.628422	-11.1094	-1.20654	1.52973	0.404023	11.9221		-0.0619522
20211226	10.28	4.48196	1.84856	2.26504	-0.544235	-0.33765	0.662571	-11.1561	-1.20835	1.52202	0.403668	11.9189		8.59556
20211227	0.83	-2.08267	0.0255362	1.77529	-0.459047	-0.436441	0.696618	-11.1985	-1.20992	1.5143	0.40331	11.9156		-0.281844
20211228	0.06	-0.178168	-1.46834	0.874133	-0.349988	-0.541237	0.73023	-11.2367	-1.21126	1.50657	0.402947	11.9124		-0.772375
20211229	0	-0.0628437	-1.23014	-0.131852	-0.232684	-0.647629	0.763061	-11.2707	-1.21236	1.49883	0.402581	11.9091		-1.42484
20211230	0	0.242961	-0.411971	-0.958819	-0.122562	-0.751225	0.794746	-11.3003	-1.21323	1.49107	0.40221	11.9059		-1.12783
20211231	0	-0.142914	-0.131074	-1.39968	-0.0317454	-0.847667	0.824909	-11.3257	-1.21386	1.48331	0.401836	11.9026		-1.67367
20220101	0	0.458415	-0.261465	-1.39562	0.0314908	-0.932699	0.853176	-11.3468	-1.21425	1.47553	0.401457	11.8994		-1.19867
20220102	0	-0.6152	-0.480597	-1.01294	0.0603143	-1.00242	0.879182	-11.3636	-1.21439	1.46774	0.401074	11.8961		-2.10874
20220103	0	-0.213339	-0.558855	-0.379173	0.0516331	-1.05351	0.90258	-11.3761	-1.2143	1.45994	0.400687	11.8928		-1.15137
20220104	1.72	0.612648	-0.198942	0.308272	0.00494475	-1.08311	0.92304	-11.3843	-1.21396	1.45213	0.400296	11.8896		0.721979
20220105	0.34	-1.51298	0.688581	0.835262	-0.0787938	-1.08873	0.940235	-11.3881	-1.21338	1.4443	0.399901	11.8863		0.010866
20220106	4.52	1.94593	1.24299	1.08984	-0.197582	-1.06823	0.953842	-11.3877	-1.21255	1.43647	0.399502	11.883		4.27875
20220107	0.71	-0.476773	0.771795	1.04761	-0.346796	-1.01995	0.963551	-11.3829	-1.21147	1.42862	0.399098	11.8797		1.34263
20220108	0.16	-0.956578	-0.203235	0.7724	-0.517708	-0.942831	0.969079	-11.3738	-1.21015	1.42076	0.398691	11.8765		-0.387413
20220109	0.03	0.487859	-0.784506	0.386508	-0.69972	-0.836463	0.970171	-11.3604	-1.20858	1.41289	0.398279	11.8732		0.0898611
20220110	0.13	0.0800512	-0.953024	0.0232935	-0.879279	-0.701285	0.966614	-11.3427	-1.20676	1.40501	0.397863	11.8699		-0.849679
20220111	0.03	-0.0703432	-0.666847	-0.279264	-1.03886	-0.538423	0.958251	-11.3207	-1.20469	1.39712	0.397444	11.8666		-1.01645
20220112	0	-0.321547	0.162102	-0.55474	-1.15927	-0.349803	0.944967	-11.2944	-1.20238	1.38921	0.39702	11.8633		-0.714185
20220113	0.28	-0.465663	1.09466	-0.859331	-1.22166	-0.137992	0.926688	-11.2638	-1.19982	1.3813	0.396592	11.86		-0.230333
20220114	2.77	1.58143	1.44399	-1.21176	-1.21003	0.0940403	0.903362	-11.2288	-1.19702	1.37337	0.396159	11.8567		1.81366
20220115	0.05	-1.31927	0.881252	-1.53482	-1.11675	0.342818	0.874976	-11.1896	-1.19398	1.36543	0.395723	11.8534		-1.97284
20220116	0	0.560529	-0.186475	-1.68324	-0.941948	0.604211	0.841543	-11.1461	-1.19069	1.35749	0.395282	11.8501		-1.30918
20220117	0.01	-0.152583	-1.50847	-1.51413	-0.693756	0.873584	0.803087	-11.0983	-1.18715	1.34953	0.394837	11.8468		-3.17517
20220118	0.08	0.415849	-2.21975	-0.950641	-0.388823	1.1459	0.759627	-11.0463	-1.18338	1.34156	0.394389	11.8435		-2.75454
20220119	0.12	-1.82318	-1.08944	-0.0983559	-0.0515266	1.41599	0.711185	-10.9901	-1.17937	1.33358	0.393935	11.8402		-3.01098
20220120	4.72	-0.606994	1.36847	0.819849	0.292022	1.6786	0.657785	-10.9296	-1.17513	1.32559	0.393478	11.8369		1.58133
20220121	13.34	3.83636	2.69836	1.56263	0.615419	1.92848	0.599457	-10.8649	-1.17065	1.31758	0.393017	11.8336		8.09735
20220122	7.6	-1.13519	1.00804	1.97118	0.892376	2.16043	0.536242	-10.7961	-1.16594	1.30957	0.392551	11.8302		1.84403
20220123	4.46	-1.4236	-1.58464	2.06029	1.09873	2.36927	0.468201	-10.7231	-1.16099	1.30155	0.392081	11.8269		-0.947957
20220124	3.55	-1.93154	-1.87459	1.91714	1.21645	2.55018	0.395417	-10.6459	-1.15582	1.29351	0.391607	11.8236		-1.88899
20220125	7.37	0.207612	-0.0961535	1.65592	1.23803	2.69901	0.317989	-10.5646	-1.15043	1.28547	0.391129	11.8203		1.76738
20220126	12.97	5.65717	1.01292	1.30563	1.17018	2.81289	0.236046	-10.4792	-1.14481	1.27741	0.390646	11.8169		7.97572
20220127	1.33	-6.62466	0.978885	0.802424	1.02905	2.89036	0.14976	-10.3898	-1.13897	1.26935	0.39016	11.8136		-4.84335
20220128	8.8	2.01701	1.00628	0.0943483	0.836608	2.93119	0.0593491	-10.2962	-1.13292	1.26127	0.389669	11.8102		3.11764
20220129	10.81	5.38356	0.617064	-0.771243	0.614799	2.93583	-0.0349333	-10.1987	-1.12666	1.25318	0.389174	11.8069		5.22938
20220130	0	-4.28749	-0.511807	-1.6547	0.383643	2.90501	-0.132799	-10.097	-1.12018	1.24509	0.388674	11.8036		-6.454
20220131	0.19	-1.30705	-1.21346	-2.33314	0.160264	2.83979	-0.233926	-9.99142	-1.1135	1.23698	0.388171	11.8002		-4.85365
20220201	2.81	1.30059	-0.814524	-2.59494	-0.0408021	2.74156	-0.337955	-9.88182	-1.10662	1.22886	0.387663	11.7969		-2.10888
20220202	5.1	2.73673	-0.483791	-2.29601	-0.209036	2.61224	-0.444485	-9.76827	-1.09953	1.22073	0.387151	11.7935		-0.0430708
20220203	0.92	-0.316688	-1.27168	-1.4239	-0.341408	2.45397	-0.553096	-9.65079	-1.09225	1.21259	0.386634	11.7901		-3.01226
20220204	0	-1.26017	-1.80149	-0.192343	-0.442988	2.26888	-0.663341	-9.52942	-1.08478	1.20444	0.386114	11.7868		-3.254
20220205	0.04	-4.22624	-0.0231784	1.08385	-0.521374	2.0591	-0.774752	-9.40419	-1.07712	1.19628	0.385589	11.7834		-3.16556
20220206	11.43	3.19987	2.78122	2.06764	-0.585547	1.82694	-0.886846	-9.27513	-1.06926	1.18811	0.38506	11.7801		8.04873
20220207	12.98	3.79395	3.28075	2.46626	-0.646009	1.57479	-0.99913	-9.14229	-1.06123	1.17993	0.384526	11.7767		9.54095
20220208	1.46	-3.72899	0.873309	2.17143	-0.709566	1.30505	-1.11108	-9.0057	-1.05302	1.17174	0.383989	11.7733		-0.684246
20220209	1.89	-0.491934	-1.83138	1.38395	-0.77309	1.02022	-1.22214	-8.86539	-1.04462	1.16354	0.383447	11.7699		-0.939362
20220210	0	0.0945271	-2.46468	0.386738	-0.827566	0.722577	-1.33175	-8.72141	-1.03606	1.15533	0.3829	11.7666		-1.98342
20220211	0.09	-0.160246	-1.26613	-0.547891	-0.860862	0.414278	-1.4393	-8.57379	-1.02732	1.14711	0.38235	11.7632		-1.97427
20220212	0.12	0.158795	0.0285013	-1.22309	-0.860134	0.0974467	-1.5442	-8.42258	-1.01842	1.13888	0.381795	11.7598		-1.03579
20220213	0.11	0.464418	0.600284	-1.57131	-0.810819	-0.225551	-1.64584	-8.26782	-1.00935	1.13064	0.381236	11.7564		-0.506605
20220214	0	-0.16068	0.617078	-1.60653	-0.700388	-0.552108	-1.74358	-8.10955	-1.00012	1.12239	0.380672	11.753		-1.15013
20220215	0	0.174506	0.360794	-1.37292	-0.522348	-0.879539	-1.83682	-7.94782	-0.990735	1.11413	0.380104	11.7496		-0.837618
20220216	0.05	0.207189	-0.164827	-0.918231	-0.281672	-1.20508	-1.92491	-7.78268	-0.981194	1.10586	0.379532	11.7462		-0.875869
20220217	0.38	-0.283241	-0.692512	-0.305729	0.00839703	-1.5258	-2.00725	-7.61417	-0.971502	1.09758	0.378955	11.7428		-1.28148
20220218	0.18	-0.753374	-0.829615	0.365519	0.328743	-1.83845	-2.0832	-7.44235	-0.961662	1.08929	0.378375	11.7394		-1.21747
20220219	3.03	0.572784	-0.332777	0.959524	0.656444	-2.13948	-2.15215	-7.26727	-0.951677	1.08099	0.377789	11.736		1.19953
20220220	1.87	-0.728329	0.630778	1.30519	0.968332	-2.42517	-2.21345	-7.089	-0.941551	1.07268	0.3772	11.7326		1.20764
20220221	4.85	0.134505	1.42179	1.27571	1.23984	-2.6918	-2.26649	-6.90759	-0.931287	1.06436	0.376606	11.7292		2.832
20220222	6.06	2.78278	1.16922	0.86569	1.44674	-2.93569	-2.31068	-6.72312	-0.920887	1.05603	0.376008	11.7258		4.8177
20220223	0.13	-2.32389	0.0283822	0.192749	1.56731	-3.15337	-2.34543	-6.53565	-0.910356	1.04769	0.375405	11.7224		-2.10276
20220224	0	0.0371225	-0.941012	-0.517175	1.58526	-3.34187	-2.37023	-6.34525	-0.899697	1.03934	0.374798	11.719		-1.42106
20220225	0	0.706327	-1.30773	-1.04589	1.48765	-3.49895	-2.38459	-6.152	-0.888912	1.03099	0.374187	11.7155		-1.64729
20220226	0	-0.134644	-0.994895	-1.25374	1.26834	-3.62318	-2.3881	-5.95599	-0.878005	1.02262	0.373571	11.7121		-2.38328
20220227	0	-0.167617	-0.0440006	-1.12264	0.930901	-3.71381	-2.38043	-5.75729	-0.86698	1.01424	0.372951	11.7087		-1.33426
20220228	0.09	-0.969318	0.993859	-0.736521	0.489374	-3.77043	-2.36129	-5.556	-0.855839	1.00585	0.372326	11.7053		-0.711981
20220301	2.74	1.60618	1.22839	-0.205694	-0.0360248	-3.79326	-2.3305	-5.35222	-0.844586	0.997456	0.371697	11.7018		2.62887
20220302	0	-1.03948	0.340137	0.359395	-0.619654	-3.78285	-2.28794	-5.14603	-0.833224	0.989049	0.371064	11.6984		-0.339946
20220303	0.03	0.0854525	-0.772898	0.901233	-1.23423	-3.73962	-2.23356	-4.93756	-0.821756	0.980633	0.370426	11.695		0.213788
20220304	0	-0.0450111	-1.04002	1.36951	-1.85163	-3.66389	-2.16736	-4.7269	-0.810186	0.972208	0.369784	11.6915		0.284477
20220305	0.07	-1.77216	-0.162873	1.67701	-2.4413	-3.55609	-2.08944	-4.51418	-0.798516	0.963773	0.369138	11.6881		-0.258023
20220306	4.7	2.89098	0.828678	1.68939	-2.96653	-3.41692	-1.99994	-4.29953	-0.786751	0.955329	0.368487	11.6846		5.40905
20220307	0.15	-1.59173	0.930371	1.25143	-3.38674	-3.24756	-1.89915	-4.08305	-0.774892	0.946876	0.367831	11.6812		0.590077
20220308	0	-0.0556654	0.781596	0.313964	-3.66068	-3.04976	-1.78748	-3.86489	-0.762945	0.938413	0.367172	11.6777		1.03989
20220309	0	0.0531606	0.944223	-0.965295	-3.75062	-2.82535	-1.66543	-3.64517	-0.750911	0.929941	0.366507	11.6742		0.0320887
20220310	0	0.605306	0.704755	-2.21911	-3.62174	-2.57648	-1.53356	-3.42402	-0.738794	0.921459	0.365839	11.6708		-0.90905
20220311	0	1.06309	-0.663777	-3.01621	-3.24729	-2.30546	-1.39254	-3.20157	-0.726597	0.912969	0.365165	11.6673		-2.6169
20220312	0	3.13802	-3.30115	-3.0044	-2.61732	-2.01522	-1.24311	-2.97796	-0.714324	0.904469	0.364488	11.6639		-3.16753
20220313	0	2.81627	-5.45343	-2.08761	-1.7572	-1.70977	-1.08599	-2.75332	-0.701977	0.89596	0.363806	11.6604		-4.72477
20220314	0.03	-3.45227	-2.78382	-0.587724	-0.729473	-1.39376	-0.92198	-2.52779	-0.68956	0.887441	0.363119	11.6569		-6.82381
20220315	0	-14.8617	5.73245	1.04621	0.392357	-1.07228	-0.751857	-2.3015	-0.677077	0.878914	0.362428	11.6534		-8.08299
20220316	40.07	17.2441	10.9373	2.35226	1.53648	-0.750627	-0.576433	-2.07459	-0.66453	0.870378	0.361733	11.65		30.5336
20220317	0.79	-16.3685	1.57744	2.94198	2.63485	-0.434272	-0.396537	-1.84719	-0.651923	0.861832	0.361033	11.6465		-11.8491
20220318	0	-6.25639	-10.9281	2.84504	3.62628	-0.128859	-0.213019	-1.61944	-0.639259	0.853277	0.360328	11.643		-14.3394
20220319	0.06	-6.96086	-10.0398	2.25209	4.4558	0.159798	-0.026734	-1.39147	-0.62654	0.844714	0.359619	11.6395		-14.7485
20220320	6.44	-14.9439	3.21563	1.2814	5.08291	0.425978	0.161455	-1.16342	-0.613772	0.836141	0.358906	11.636		-10.4469
20220321	51.29	21.5725	11.986	-0.0204481	5.4899	0.664527	0.350673	-0.935423	-0.600956	0.82756	0.358188	11.6325		33.5381
20220322	3.39	-18.3746	5.00922	-1.52624	5.66895	0.871621	0.540014	-0.707619	-0.588096	0.81897	0.357465	11.629		-14.8916
20220323	0.3	-10.6437	-5.31254	-2.84966	5.61232	1.04552	0.728543	-0.480143	-0.575195	0.81037	0.356738	11.6255		-18.8059
20220324	0.03	-8.29677	-6.99351	-3.58749	5.31282	1.18675	0.915298	-0.25313	-0.562257	0.801762	0.356007	11.622		-18.8778
20220325	9.8	-3.72702	-2.4626	-3.46075	4.76025	1.29793	1.09925	-0.0267192	-0.549284	0.793145	0.355271	11.6185		-9.65037
20220326	40.51	22.8871	0.551324	-2.26367	3.96348	1.38287	1.27934	0.198953	-0.536281	0.784519	0.35453	11.615		21.1747
20220327	13.52	-3.03593	-2.07135	0.0611179	2.95002	1.44532	1.45454	0.423747	-0.523249	0.775885	0.353785	11.6115		-5.04616
20220328	0.03	-14.9763	-5.87709	3.01744	1.75584	1.4889	1.62381	0.647522	-0.510193	0.767242	0.353035	11.608		-17.8359
20220329	0.03	-18.3919	-4.23969	5.91589	0.435844	1.51699	1.78614	0.870138	-0.497115	0.75859	0.352281	11.6045		-16.7157
20220330	7.82	-22.2666	5.85632	8.08917	-0.944085	1.53321	1.94051	1.09146	-0.48402	0.749929	0.351522	11.601		-8.32114
20220331	64.17	26.0589	14.2907	8.70618	-2.31398	1.54165	2.08598	1.31133	-0.47091	0.74126	0.350759	11.5974		49.0558
20220401	32.18	-0.100772	11.5636	7.11342	-3.60161	1.54646	2.22157	1.52964	-0.457788	0.732582	0.349991	11.5939		18.5762
20220402	0.13	-20.4687	3.89816	3.23929	-4.74385	1.55205	2.34634	1.74623	-0.444659	0.723896	0.349219	11.5904		-13.3312
20220403	0.03	-10.0262	-0.292953	-2.59979	-5.69362	1.56343	2.45936	1.96097	-0.431526	0.715201	0.348442	11.5869		-12.9189
20220404	13.75	11.1254	0.430972	-9.40629	-6.40636	1.58581	2.55975	2.17375	-0.418394	0.706497	0.34766	11.5833		2.15011
20220405	4.25	4.99423	2.69036	-15.2958	-6.82672	1.62405	2.64669	2.38444	-0.405267	0.697785	0.346874	11.5798		-7.61117
20220406	0.05	6.44766	-0.379521	-18.2882	-6.90462	1.68215	2.71951	2.59292	-0.392148	0.689065	0.346083	11.5762		-12.2201
20220407	0.08	13.174	-10.0013	-17.2559	-6.63669	1.76305	2.77763	2.79908	-0.379044	0.680336	0.345288	11.5727		-14.0832
20220408	0	18.1458	-20.8619	-11.9	-6.06165	1.86774	2.82062	3.0028	-0.365957	0.671598	0.344488	11.5691		-14.6161
20220409	0.03	10.5284	-22.8292	-2.72393	-5.25858	1.99608	2.84814	3.20398	-0.352894	0.662853	0.343683	11.5656		-15.0247
20220410	0	-16.1306	-8.13778	8.48784	-4.31791	2.14698	2.85999	3.4025	-0.339857	0.654099	0.342874	11.562		-15.7805
20220411	0	-53.84	17.3521	18.7165	-3.33081	2.31836	2.85602	3.59826	-0.326852	0.645336	0.34206	11.5585		-17.7714
20220412	130.67	56.8146	30.3175	24.5483	-2.38804	2.5069	2.83614	3.79117	-0.313884	0.636566	0.341242	11.5549		111.68
20220413	1.1	-53.8648	12.0528	23.4984	-1.5707	2.70671	2.80034	3.98112	-0.300957	0.627787	0.340419	11.5514		-18.3135
20220414	44.45	18.4303	-11.4165	16.5196	-0.907577	2.90869	2.74867	4.16805	-0.288076	0.619	0.339591	11.5478		23.5334
20220415	44.42	37.1143	-20.0299	5.46086	-0.349403	3.10252	2.68126	4.35184	-0.275244	0.610205	0.338759	11.5442		22.5452
20220416	14.16	11.8238	-12.5121	-7.13037	0.170154	3.27787	2.59827	4.53243	-0.262469	0.601401	0.337922	11.5407		-7.8187
20220417	4.87	4.34393	-5.13646	-17.6995	0.717395	3.42455	2.49991	4.70974	-0.249753	0.59259	0.33708	11.5371		-18.492
20220418	0.61	5.58737	-5.61775	-23.7476	1.35711	3.53285	2.38647	4.88369	-0.237102	0.58377	0.336234	11.5335		-23.778
20220419	0.05	10.8108	-11.1409	-24.8398	2.13951	3.59328	2.2583	5.05421	-0.224521	0.574942	0.335383	11.5299		-25.1698
20220420	1.65	11.6181	-15.4505	-21.4286	3.055	3.59699	2.11586	5.22126	-0.212014	0.566107	0.334527	11.5264		-25.2611
20220421	0	-0.35736	-11.9857	-14.4421	4.04154	3.53768	1.95975	5.38477	-0.199587	0.557263	0.333667	11.5228		-26.7852
20220422	0.63	-24.5503	2.20889	-5.32962	5.02698	3.41027	1.79071	5.54469	-0.187244	0.548411	0.332802	11.5192		-27.671
20220423	5.08	-48.5128	20.911	4.0873	5.93603	3.2107	1.60964	5.70099	-0.17499	0.539552	0.331932	11.5156		-23.5145
20220424	114.74	47.2985	26.1928	11.7738	6.67756	2.93686	1.41754	5.85364	-0.16283	0.530684	0.331058	11.512		85.2651
20220425	2.95	-41.2652	-1.5211	16.1868	7.10671	2.58914	1.21552	6.00259	-0.150769	0.521808	0.330179	11.5084		-26.5995
20220426	2.36	-18.582	-25.6504	17.7333	7.01625	2.1715	1.00482	6.14784	-0.138812	0.512925	0.329295	11.5048		-26.4991
20220427	0.07	-39.8377	-3.8297	17.2341	6.23915	1.69155	0.786707	6.28935	-0.126963	0.504034	0.328407	11.5012		-26.4333
20220428	101.92	41.4321	20.9703	14.5096	4.84064	1.16045	0.562431	6.42712	-0.115228	0.495135	0.327514	11.4976		76.912
20220429	0.7	-38.275	7.46637	9.44757	2.96099	0.594417	0.333253	6.56112	-0.103611	0.486228	0.326616	11.494		-21.3611
20220430	39.3	29.1861	-12.4032	2.67182	0.764637	0.0132056	0.100437	6.69133	-0.0921177	0.477314	0.325713	11.4904		19.4548
20220501	17.77	17.6862	-11.8666	-4.83141	-1.53647	-0.562886	-0.134717	6.81774	-0.0807526	0.468392	0.324806	11.4868		0.988216
20220502	0.03	-1.52707	-0.937541	-11.1438	-3.70007	-1.11373	-0.370873	6.94032	-0.0695205	0.459462	0.323894	11.4832		-13.6084
20220503	0	-2.03554	4.65569	-14.1585	-5.48074	-1.61927	-0.606658	7.05906	-0.0584261	0.450524	0.322977	11.4795		-11.5384
20220504	0	1.23399	1.27655	-13.0608	-6.66076	-2.05983	-0.84064	7.17393	-0.047474	0.441579	0.322056	11.4759		-10.5503
20220505	0	6.5657	-6.59939	-8.88485	-7.13787	-2.41698	-1.07134	7.2849	-0.0366687	0.432626	0.321129	11.4723		-8.91854
20220506	0	7.33831	-12.3714	-3.24258	-6.9602	-2.67769	-1.29726	7.39192	-0.0260147	0.423666	0.320198	11.4687		-8.27571
20220507	0.7	-2.22437	-7.72076	2.22772	-6.21066	-2.83778	-1.51691	7.49495	-0.0155162	0.414698	0.319263	11.465		-7.71741
20220508	0.03	-25.3732	9.29681	6.16361	-4.96962	-2.90019	-1.72873	7.59397	-0.00517729	0.405723	0.318322	11.4614		-9.91282
20220509	66.51	25.6897	22.3837	7.35926	-3.32467	-2.87254	-1.93107	7.68891	0.0049981	0.39674	0.317377	11.4577		55.4326
20220510	1.5	-23.4453	6.00989	5.31153	-1.42312	-2.76403	-2.12239	7.77974	0.0150065	0.38775	0.316427	11.4541		-12.1239
20220511	3.46	5.6695	-18.9411	1.91468	0.492928	-2.58464	-2.30121	7.86641	0.0248455	0.378753	0.315472	11.4505		-11.357
20220512	0.13	2.62234	-19.1198	-0.571661	2.15655	-2.34448	-2.46612	7.94887	0.0345132	0.369748	0.314512	11.4468		-17.0691
20220513	1.28	-18.2101	1.07191	-1.37209	3.35914	-2.05392	-2.61574	8.02709	0.044008	0.360735	0.313548	11.4432		-18.5103
20220514	58.25	22.9208	16.3069	-0.888037	4.0495	-1.724	-2.74867	8.10101	0.0533288	0.351716	0.312578	11.4395		38.3397
20220515	12.97	-20.1989	12.1245	0.214441	4.27351	-1.36816	-2.86353	8.1706	0.0624748	0.342689	0.311604	11.4359		-7.85996
20220516	0.1	-22.3996	1.05413	1.22887	4.1051	-1.00333	-2.95895	8.23583	0.071445	0.333655	0.310626	11.4322		-20.1166
20220517	1.24	-16.3814	-3.96447	1.45164	3.63188	-0.649076	-3.03358	8.29667	0.0802386	0.324613	0.309642	11.4285		-18.8942
20220518	42.89	24.9798	-2.82013	0.385466	2.96873	-0.326406	-3.08614	8.35307	0.0888547	0.315565	0.308653	11.4249		22.5452
20220519	10.89	-8.14185	1.26392	-1.67417	2.25429	-0.0566309	-3.11535	8.40503	0.0972926	0.306509	0.30766	11.4212		-8.5521
20220520	0	-19.3808	3.78286	-3.52881	1.62663	0.139555	-3.12009	8.45251	0.105552	0.297446	0.306662	11.4175		-19.1267
20220521	16.08	-0.0148588	1.49684	-4.09832	1.21207	0.243758	-3.09946	8.4955	0.113632	0.288376	0.305659	11.4139		-2.61634
20220522	24.77	13.5516	-4.32895	-3.22953	1.10729	0.243738	-3.05302	8.53402	0.121532	0.279299	0.304651	11.4102		5.99311
20220523	0.11	-6.93768	-10.4912	-1.30355	1.30997	0.138797	-2.98076	8.56809	0.129253	0.270215	0.303639	11.4065		-18.7325
20220524	0.12	-8.95252	-11.952	1.19933	1.74145	-0.0587349	-2.88328	8.59773	0.136795	0.261124	0.302621	11.4028		-19.7052
20220525	31.49	11.7753	-4.42023	3.66785	2.305	-0.330969	-2.76156	8.62298	0.144158	0.252026	0.301599	11.3991		11.0229
20220526	22.61	-12.8467	10.16	5.40427	2.90264	-0.657802	-2.61677	8.64387	0.151343	0.242921	0.300572	11.3955		2.71754
20220527	56.8	13.296	16.9119	5.7024	3.43898	-1.01842	-2.45011	8.66042	0.158349	0.233809	0.299539	11.3918		35.9103
20220528	22.79	-9.72402	7.98859	4.15913	3.82618	-1.39189	-2.26289	8.67267	0.165179	0.22469	0.298502	11.3881		2.4237
20220529	6.28	-8.79021	-6.54037	1.49808	4.00241	-1.75805	-2.05645	8.68066	0.171832	0.215564	0.297461	11.3844		-13.8325
20220530	2.4	-0.24291	-16.0984	-1.2782	3.91554	-2.09814	-1.83217	8.6844	0.178309	0.206432	0.296414	11.3807		-17.6195
20220531	3.3	3.32455	-17.7001	-3.23512	3.51923	-2.39669	-1.59144	8.68394	0.184611	0.197292	0.295362	11.377		-17.6106
20220601	4.61	2.62874	-13.5859	-3.83585	2.77965	-2.64334	-1.33563	8.67931	0.190739	0.188146	0.294306	11.3733		-14.793
20220602	14.56	3.91143	-5.08784	-3.17783	1.68569	-2.83238	-1.06613	8.67055	0.196693	0.178994	0.293244	11.3696		-4.35424
20220603	12.2	-10.8783	7.7752	-1.67362	0.267074	-2.96104	-0.7843	8.6577	0.202475	0.169834	0.292178	11.3658		-4.7767
20220604	43.76	11.0105	16.7675	0.211836	-1.40916	-3.02792	-0.491492	8.64078	0.208084	0.160668	0.291107	11.3621		27.9898
20220605	42.81	13.4141	13.7054	2.00242	-3.25463	-3.0327	-0.189072	8.61985	0.213522	0.151495	0.290031	11.3584		29.1219
20220606	0.95	-15.1801	0.419015	3.26675	-5.16865	-2.97575	0.121558	8.59495	0.218789	0.142315	0.28895	11.3547		-11.4943
20220607	0.45	-3.12842	-11.4235	3.74075	-7.04547	-2.85735	0.438918	8.56612	0.223886	0.133129	0.287864	11.351		-10.8112
20220608	3.26	5.2533	-14.9773	3.21082	-8.7848	-2.67732	0.761415	8.53342	0.228813	0.123937	0.286773	11.3472		-6.51319
20220609	8.71	8.8001	-10.2178	1.5851	-10.2996	-2.43518	1.08738	8.49688	0.233571	0.114737	0.285677	11.3435		0.167432
20220610	0.22	-9.42233	1.72706	-0.823533	-11.5078	-2.13105	1.41509	8.45657	0.238161	0.105532	0.284576	11.3398		-8.5188
20220611	22.43	3.82164	14.4781	-3.52653	-12.3279	-1.76652	1.74281	8.41252	0.242584	0.0963196	0.283471	11.336		14.7732
20220612	29.27	8.04963	18.8143	-5.89535	-12.6807	-1.34478	2.06874	8.3648	0.246839	0.087101	0.28236	11.3323		20.9685
20220613	0.22	-10.8068	9.00971	-7.39373	-12.4867	-0.871105	2.39111	8.31345	0.250929	0.077876	0.281244	11.3286		-9.19086
20220614	0	4.87358	-8.53585	-7.92881	-11.6846	-0.352567	2.70814	8.25853	0.254853	0.0686446	0.280124	11.3248		-11.5911
20220615	0	16.3927	-22.4725	-7.36816	-10.2398	0.201822	3.01802	8.20009	0.258612	0.0594069	0.278998	11.3211		-13.4479
20220616	0.47	14.7732	-24.1256	-5.64788	-8.14476	0.780072	3.31895	8.1382	0.262206	0.0501629	0.277868	11.3173		-15.0003
20220617	0.89	-5.88989	-9.17439	-3.26929	-5.43019	1.36845	3.60913	8.07291	0.265638	0.0409125	0.276732	11.3136		-18.3336
20220618	4.13	-34.2892	16.3535	-1.14279	-2.16029	1.95295	3.88676	8.00429	0.268906	0.0316559	0.275592	11.3098		-19.0785
20220619	93.04	34.0244	31.1681	-0.252991	1.54882	2.51953	4.15004	7.93239	0.272013	0.0223931	0.274446	11.306		64.9395
20220620	8.2	-31.9577	8.4443	-1.00101	5.49328	3.05421	4.39718	7.85727	0.274958	0.0131241	0.273296	11.3023		-24.5144
[truncated: 194 more rows]
