# Supplementary material for: Multifractal analysis of vegetation regulation on ecohydrological processes in a small watershed
Source: PeerJ journal article supplement (doi:10.7717/peerj.20496), 2026-01-12
Supplement: Figure_2_data.zip [file Runoff-EEMD.xlsx]

## Sheet: Sheet1
IMF components		IMF1	IMF2	IMF3	IMF4	IMF5	IMF6	IMF7	IMF8	IMF9	IMF10	RES
Variance Ratio		43.3345	29.5315	9.28588	5.68551	2.23435	2.4633	3.42706	2.21081	1.105	0.18075	0.541322
Mean Period		4.72198	10.5337	18.2583	29.2133	81.1481	109.55	365.167	365.167	2191	2191	2191
20170101	0.092	0.110112	-0.226974	-0.0517635	-2.38151	-0.201057	-0.287362	-2.365	-0.27962	-0.0775825	-0.0101601	5.63204		-0.168626
20170102	0.3852	0.122429	0.0771741	0.0266382	-2.22607	-0.203266	-0.282448	-2.33928	-0.236218	-0.0693214	-0.0121866	5.63011		0.226242
20170103	0.6784	-0.117977	0.291545	0.113155	-2.06124	-0.211934	-0.277028	-2.31322	-0.193436	-0.0611043	-0.0142111	5.62819		0.286723
20170104	0.9716	-0.213097	0.368527	0.202785	-1.88736	-0.226746	-0.271126	-2.28682	-0.15127	-0.052931	-0.0162337	5.62626		0.358215
20170105	1.2648	0.0046285	0.270316	0.290528	-1.70474	-0.247383	-0.264768	-2.2601	-0.10972	-0.0448015	-0.0182544	5.62434		0.565472
20170106	1.557	-0.0213263	0.0341811	0.371279	-1.5137	-0.273529	-0.257979	-2.23307	-0.0687805	-0.0367159	-0.0202731	5.62242		0.384134
20170107	1.8502	-0.127898	-0.167758	0.439891	-1.31456	-0.304868	-0.250783	-2.20574	-0.0284502	-0.028674	-0.0222899	5.6205		0.144235
20170108	2.1434	0.402457	-0.235396	0.493432	-1.10764	-0.341082	-0.243207	-2.17812	0.0112738	-0.0206759	-0.0243048	5.61857		0.660493
20170109	2.4366	0.0266536	-0.190574	0.528948	-0.893251	-0.381855	-0.235275	-2.15023	0.0503944	-0.0127214	-0.0263177	5.61665		0.365028
20170110	2.7308	0.104937	-0.00987622	0.530111	-0.671716	-0.426869	-0.227012	-2.12206	0.0889142	-0.00481067	-0.0283286	5.61473		0.625172
20170111	3.024	-0.205231	0.144423	0.481573	-0.443352	-0.475808	-0.218444	-2.09365	0.126836	0.00305648	-0.0303376	5.61281		0.420765
20170112	3.3172	0.128449	0.152634	0.375901	-0.208446	-0.528356	-0.209595	-2.06499	0.164163	0.0108801	-0.0323446	5.61089		0.656984
20170113	3.61	0.159855	0.0771283	0.200473	0.0327393	-0.584194	-0.200492	-2.0361	0.200896	0.0186601	-0.0343497	5.60897		0.437456
20170114	3.61	0.345443	-0.0536606	-0.0513414	0.279327	-0.643007	-0.191158	-2.00699	0.23704	0.0263966	-0.0363528	5.60706		0.240441
20170115	3.23	-0.260786	-0.0694164	-0.366629	0.529026	-0.704477	-0.181619	-1.97768	0.272597	0.0340896	-0.038354	5.60514		-0.696831
20170116	3.23	-0.259206	0.253056	-0.706552	0.777733	-0.768288	-0.171901	-1.94816	0.30757	0.0417392	-0.0403532	5.60322		-0.712702
20170117	4.31	0.648736	0.55731	-0.989845	1.0198	-0.834123	-0.162028	-1.91846	0.34196	0.0493454	-0.0423504	5.6013		0.216201
20170118	3.41	-0.020985	0.429554	-1.11154	1.24738	-0.901665	-0.152026	-1.88859	0.375772	0.0569083	-0.0443456	5.59939		-0.702974
20170119	3.23	-0.3977	-0.0348462	-1.00791	1.45173	-0.970597	-0.141919	-1.85856	0.409008	0.0644278	-0.0463388	5.59747		-1.44045
20170120	3.83	0.535769	-0.681722	-0.670411	1.6235	-1.0406	-0.131733	-1.82837	0.441669	0.071904	-0.0483301	5.59556		-0.816363
20170121	3.83	0.55268	-1.2674	-0.144385	1.75325	-1.11137	-0.121493	-1.79805	0.47376	0.079337	-0.0503193	5.59364		-0.859106
20170122	3.61	-0.684742	-0.976789	0.45052	1.83199	-1.18255	-0.111225	-1.7676	0.505283	0.0867267	-0.0523066	5.59173		-1.21101
20170123	3.23	-3.21687	0.706079	0.938218	1.85087	-1.25374	-0.100952	-1.73703	0.536241	0.0940733	-0.0542919	5.58982		-1.57258
20170124	12	3.83473	2.01257	1.14406	1.80274	-1.32446	-0.0907015	-1.70635	0.566636	0.101377	-0.0562752	5.58791		6.99137
20170125	3.61	-2.94432	0.833225	0.974261	1.68752	-1.3942	-0.0804972	-1.67559	0.596471	0.108637	-0.0582564	5.58599		-1.13684
20170126	3.83	-0.91214	-0.857107	0.549771	1.51522	-1.46248	-0.0703647	-1.64474	0.625748	0.115854	-0.0602357	5.58408		-1.21948
20170127	3.83	0.63759	-1.16667	0.0517982	1.30294	-1.52879	-0.0603291	-1.61382	0.654471	0.123029	-0.0622129	5.58217		-0.477281
20170128	3.23	0.240907	-0.48651	-0.369894	1.06939	-1.59249	-0.0504155	-1.58284	0.682643	0.13016	-0.0641882	5.58026		-0.615498
20170129	3.23	-0.141807	0.0544668	-0.617089	0.831613	-1.65279	-0.0406491	-1.55181	0.710265	0.137248	-0.0661614	5.57835		-0.704429
20170130	3.06	0.0544162	0.102058	-0.670645	0.603467	-1.70865	-0.031055	-1.52075	0.737341	0.144294	-0.0681325	5.57644		-0.514171
20170131	3.06	-6.56865e-05	0.0535327	-0.577773	0.394163	-1.75891	-0.0216584	-1.48966	0.763873	0.151296	-0.0701017	5.57454		-0.524306
20170201	3.06	0.152887	0.081389	-0.387842	0.207063	-1.80219	-0.0124845	-1.45856	0.789864	0.158256	-0.0720688	5.57263		-0.153566
20170202	3.06	-0.0136938	0.0321712	-0.166758	0.0418782	-1.8369	-0.00355835	-1.42746	0.815318	0.165173	-0.0740339	5.57072		-0.14828
20170203	3.06	-0.133849	0.0361916	0.017151	-0.105513	-1.86128	0.00509487	-1.39637	0.840235	0.172047	-0.075997	5.56881		-0.0805069
20170204	4.06	0.711877	0.122888	0.138586	-0.242567	-1.87338	0.01345	-1.3653	0.86462	0.178878	-0.077958	5.56691		0.973351
20170205	3.06	-0.272716	0.0140385	0.206998	-0.376482	-1.87114	0.0214819	-1.33426	0.888475	0.185667	-0.079917	5.565		-0.051679
20170206	2.99	-0.0941343	-0.190081	0.256293	-0.511802	-1.85269	0.0291655	-1.30327	0.911803	0.192413	-0.0818739	5.5631		-0.027922
20170207	2.99	0.068979	-0.23302	0.315327	-0.651208	-1.81628	0.0364755	-1.27233	0.934606	0.199116	-0.0838288	5.56119		0.151286
20170208	3.06	-0.516129	-0.066605	0.392717	-0.794441	-1.76026	0.0433871	-1.24146	0.956887	0.205777	-0.0857816	5.55929		-0.190017
20170209	3.83	0.551176	0.145382	0.473437	-0.93779	-1.68319	0.0498768	-1.21067	0.978648	0.212395	-0.0877324	5.55739		1.16999
20170210	3.23	-0.439423	0.177832	0.518891	-1.07386	-1.58404	0.0559219	-1.17996	0.999894	0.218971	-0.0896811	5.55549		0.2573
20170211	3.23	-0.0264727	0.0702028	0.497944	-1.19186	-1.46212	0.0615011	-1.14936	1.02063	0.225504	-0.0916277	5.55358		0.541674
20170212	3.23	0.0497625	-0.103761	0.377403	-1.28062	-1.317	0.0666022	-1.11887	1.04085	0.231995	-0.0935723	5.55168		0.323405
20170213	3.23	-0.0115173	-0.249986	0.119762	-1.33018	-1.14847	0.0712192	-1.08851	1.06056	0.238444	-0.0955147	5.54978		-0.141742
20170214	3.06	0.234187	-0.204037	-0.298948	-1.33344	-0.956679	0.0753465	-1.05828	1.07977	0.24485	-0.0974551	5.54788		-0.268798
20170215	3.06	-0.0092697	0.105327	-0.882127	-1.28757	-0.742074	0.0789811	-1.0282	1.09847	0.251214	-0.0993935	5.54598		-0.78607
20170216	3.06	-0.124939	0.633677	-1.54127	-1.19519	-0.505609	0.0821209	-0.99828	1.11667	0.257535	-0.10133	5.54408		-1.03253
20170217	3.06	-0.155862	1.08136	-2.08569	-1.06409	-0.248831	0.0847658	-0.968528	1.13438	0.263814	-0.103264	5.54218		-1.1602
20170218	4.06	0.333724	0.80061	-2.27533	-0.906103	0.0262563	0.0869164	-0.938958	1.15159	0.270051	-0.105196	5.54029		-1.141
20170219	3.23	0.130119	-0.685001	-1.93745	-0.733258	0.317374	0.0885735	-0.909582	1.16831	0.276246	-0.107126	5.53839		-2.49234
20170220	3.23	0.416541	-2.50035	-1.04613	-0.556174	0.621948	0.0897396	-0.88041	1.18454	0.282399	-0.109054	5.53649		-3.12994
20170221	3.23	-1.59517	-2.55569	0.294732	-0.384598	0.937306	0.0904177	-0.851454	1.20029	0.28851	-0.11098	5.5346		-3.85613
20170222	4.86	-4.2014	-0.16751	1.84607	-0.228006	1.26072	0.0906108	-0.822725	1.21555	0.294578	-0.112903	5.5327		-2.52284
20170223	19.1	5.26792	2.87592	3.25387	-0.0957673	1.58938	0.090322	-0.794236	1.23033	0.300605	-0.114825	5.53081		11.3977
20170224	20.4	4.39322	3.78432	4.14471	0.00285336	1.92034	0.0895543	-0.765997	1.24463	0.306589	-0.116744	5.52891		12.3222
20170225	16.8	1.10362	2.22788	4.23943	0.0602572	2.25051	0.0883106	-0.738021	1.25845	0.312532	-0.118661	5.52702		7.57093
20170226	7.31	-5.17775	0.0694839	3.58821	0.0770313	2.57689	0.0865933	-0.710317	1.27181	0.318433	-0.120577	5.52513		-1.52005
20170227	5.57	-5.06343	-1.16085	2.34655	0.0632681	2.8965	0.0843986	-0.682899	1.28469	0.324291	-0.12249	5.52323		-3.87774
20170228	14	4.79898	-1.29072	0.720036	0.0314155	3.20637	0.0817176	-0.655777	1.2971	0.330108	-0.124401	5.52134		4.22829
20170301	5.57	-1.56588	-1.50455	-1.0301	-0.00574	3.50359	0.0785392	-0.628963	1.30905	0.335884	-0.126309	5.51945		-4.10053
20170302	4.31	-1.18335	-2.21563	-2.6569	-0.0352624	3.78547	0.0748507	-0.602468	1.32054	0.341617	-0.128216	5.51756		-6.05588
20170303	4.06	0.0600695	-2.54958	-3.97133	-0.0442385	4.04948	0.07064	-0.576304	1.33157	0.347309	-0.130121	5.51567		-6.46085
20170304	4.06	0.0417539	-2.26883	-4.84963	-0.0201797	4.2933	0.0658983	-0.550482	1.34214	0.352959	-0.132023	5.51378		-7.07671
20170305	4.58	0.39815	-1.76757	-5.24073	0.0475664	4.5149	0.0606184	-0.525014	1.35226	0.358567	-0.133923	5.51189		-6.61016
20170306	4.58	-1.15092	-0.815655	-5.16017	0.164189	4.71269	0.0547935	-0.499911	1.36192	0.364134	-0.135821	5.51		-7.12675
20170307	5.16	-2.53311	0.536956	-4.66239	0.326894	4.88557	0.0484168	-0.475185	1.37114	0.369659	-0.137717	5.50811		-6.65854
20170308	15.1	5.26189	1.12549	-3.7764	0.525362	5.03256	0.0414833	-0.450847	1.37992	0.375142	-0.139611	5.50623		2.61099
20170309	14.6	4.1373	0.208018	-2.55198	0.745938	5.15278	0.0340012	-0.426908	1.38825	0.380585	-0.141503	5.50434		1.79334
20170310	5.9	-4.62363	-1.3078	-1.08784	0.974551	5.24548	0.0259936	-0.403381	1.39614	0.385985	-0.143392	5.50245		-7.01927
20170311	5.16	-6.74841	-1.83315	0.487563	1.1974	5.30993	0.0174919	-0.380277	1.40359	0.391344	-0.145279	5.50057		-8.094
20170312	13.5	-1.76892	-0.435877	2.04427	1.40066	5.34543	0.00856432	-0.357608	1.4106	0.396662	-0.147165	5.49868		-0.160524
20170313	23	4.24892	1.84626	3.40793	1.57057	5.35133	-0.000700033	-0.335385	1.41719	0.401939	-0.149048	5.4968		9.50311
20170314	26.3	4.37364	3.50176	4.38934	1.69339	5.327	-0.0101847	-0.313619	1.42334	0.407174	-0.150928	5.49492		12.2647
20170315	24.3	1.72676	3.568	4.82154	1.75565	5.27189	-0.0197551	-0.292324	1.42907	0.412368	-0.152807	5.49303		10.1163
20170316	19.1	-1.54131	2.41634	4.63899	1.7481	5.18566	-0.0292644	-0.271509	1.43438	0.41752	-0.154683	5.49115		5.51401
20170317	18	-0.0972718	0.862593	3.93058	1.6728	5.06878	-0.0385533	-0.251188	1.43926	0.422632	-0.156557	5.48927		4.6959
20170318	15.7	-0.354939	-0.336465	2.85887	1.5348	4.9227	-0.047454	-0.231371	1.44373	0.427702	-0.158429	5.48739		2.16746
20170319	13.5	-0.153223	-1.06682	1.6166	1.33867	4.74955	-0.0557854	-0.21207	1.44778	0.432731	-0.160299	5.48551		0.396551
20170320	11.5	0.0380051	-1.45981	0.409894	1.08866	4.55171	-0.0633624	-0.193297	1.45141	0.437719	-0.162167	5.48363		-1.01191
20170321	9.69	-0.00118521	-1.82708	-0.565378	0.788895	4.33154	-0.0699959	-0.175064	1.45464	0.442666	-0.164032	5.48175		-2.39364
20170322	8.07	0.344401	-2.40148	-1.16033	0.443855	4.09141	-0.0754919	-0.157381	1.45746	0.447572	-0.165895	5.47987		-3.21741
20170323	6.58	-0.230077	-2.90832	-1.31049	0.0613096	3.83371	-0.079646	-0.140261	1.45987	0.452437	-0.167756	5.47799		-4.44888
20170324	5.16	-1.4367	-2.58381	-1.04875	-0.343249	3.56071	-0.0822302	-0.123716	1.46188	0.457261	-0.169615	5.47611		-5.06926
20170325	5.9	-1.7131	-1.33551	-0.497203	-0.745546	3.27459	-0.0829938	-0.107756	1.46349	0.462044	-0.171472	5.47423		-3.54582
20170326	13.5	4.62194	-0.0801988	0.167385	-1.11656	2.97746	-0.0816373	-0.0923935	1.46471	0.466786	-0.173326	5.47236		4.70913
20170327	13.5	3.79784	0.453387	0.749661	-1.42558	2.67132	-0.077801	-0.077639	1.46553	0.471488	-0.175178	5.47048		5.00089
20170328	5.57	-3.54221	0.290292	1.07952	-1.64216	2.35815	-0.071072	-0.0635027	1.46596	0.476148	-0.177028	5.4686		-2.1724
20170329	4.06	-5.36191	0.981597	1.03487	-1.74231	2.03976	-0.0610057	-0.0499939	1.466	0.480768	-0.178876	5.46673		-3.34544
20170330	4.06	-7.58597	3.92031	0.569017	-1.71707	1.71734	-0.0471351	-0.0371218	1.46565	0.485347	-0.180721	5.46486		-3.09664
20170331	20.4	8.01211	5.46843	-0.264745	-1.57012	1.39066	-0.0289743	-0.0248951	1.46492	0.489885	-0.182564	5.46298		13.2158
20170401	0.799	-6.9681	1.87327	-1.30466	-1.30978	1.05776	-0.00601635	-0.0133221	1.46382	0.494383	-0.184405	5.46111		-6.39949
20170402	0.58	-1.21726	-2.83698	-2.22963	-0.946522	0.715678	0.0222721	-0.00241023	1.46233	0.49884	-0.186244	5.45924		-6.28387
20170403	0.485	0.450268	-4.5011	-2.70443	-0.492875	0.361285	0.0564463	0.00783474	1.46047	0.503257	-0.18808	5.45736		-6.75527
20170404	1.42	0.16445	-3.20283	-2.52887	0.0328294	-0.00818905	0.0970209	0.0174078	1.45823	0.507633	-0.189914	5.45549		-5.56724
20170405	4.31	-0.361458	-1.19564	-1.76817	0.596446	-0.395028	0.144461	0.0263046	1.45563	0.511968	-0.191746	5.45362		-3.32526
20170406	12.5	5.68789	-0.329944	-0.590032	1.15215	-0.801114	0.199131	0.0345213	1.45266	0.516263	-0.193576	5.45175		4.76791
20170407	5.16	-3.70347	0.0257272	0.694645	1.65009	-1.22794	0.26128	0.0420549	1.44933	0.520518	-0.195403	5.44988		-2.9831
20170408	3.06	-7.34135	1.11529	1.6669	2.03924	-1.67643	0.331029	0.0489025	1.44563	0.524732	-0.197228	5.44801		-4.55916
20170409	16.8	3.78679	3.07502	2.00878	2.26874	-2.14608	0.40836	0.0550616	1.44158	0.528906	-0.199051	5.44614		8.87059
20170410	19.8	7.21788	3.38433	1.65511	2.30201	-2.63228	0.493208	0.0605301	1.43717	0.53304	-0.200872	5.44428		12.2573
20170411	1.86	-6.0771	0.447878	0.756728	2.15007	-3.1253	0.585501	0.0653062	1.4324	0.537133	-0.20269	5.44241		-4.8725
20170412	5.9	2.2809	-2.12701	-0.331249	1.85399	-3.61361	0.685162	0.0693887	1.42729	0.541186	-0.204506	5.44054		-0.177355
20170413	3.61	1.14396	-1.71874	-1.23416	1.46415	-4.08662	0.792091	0.0727766	1.42183	0.545199	-0.206319	5.43867		-1.80894
20170414	2.85	0.359463	-0.340379	-1.72396	1.03472	-4.5348	0.906141	0.075468	1.41602	0.549172	-0.208131	5.43681		-1.70488
20170415	2.54	-0.164321	0.321308	-1.76368	0.614518	-4.94844	1.0271	0.07746	1.40987	0.553104	-0.20994	5.43494		-1.60669
20170416	2.23	-0.157137	0.319765	-1.48472	0.229915	-5.31622	1.15469	0.0787498	1.40338	0.556997	-0.211747	5.43308		-1.32209
20170417	2.23	0.66615	0.142735	-1.11781	-0.111647	-5.6241	1.28862	0.0793356	1.39655	0.560849	-0.213551	5.43122		-0.308925
20170418	0.799	-0.996314	-0.00365523	-0.892945	-0.415559	-5.85505	1.42856	0.0792166	1.38939	0.564662	-0.215353	5.42935		-1.89291
20170419	2.06	0.895483	0.0785648	-0.907587	-0.708612	-5.99148	1.5742	0.0783924	1.3819	0.568434	-0.217153	5.42749		0.0664606
20170420	0.58	-0.59499	0.400004	-1.06638	-1.04861	-6.01655	1.72518	0.0768622	1.37408	0.572166	-0.218951	5.42563		-1.26136
20170421	0.868	-0.244516	0.652743	-1.11351	-1.50486	-5.91542	1.88113	0.0746257	1.36594	0.575859	-0.220746	5.42377		-0.705281
20170422	2.18	1.55515	0.118964	-0.719272	-2.13686	-5.67895	2.04152	0.0716823	1.35747	0.579512	-0.222539	5.4219		0.954844
20170423	0.631	0.358743	-1.18473	0.404601	-2.96268	-5.30733	2.20563	0.0680313	1.34868	0.583125	-0.224329	5.42004		-0.421389
20170424	0.485	-0.77053	-2.07632	2.36522	-3.91864	-4.81115	2.37259	0.0636724	1.33957	0.586698	-0.226118	5.41818		-0.481637
20170425	0.685	-3.78492	-1.19336	4.97921	-4.90589	-4.20515	2.54147	0.0586049	1.33014	0.590231	-0.227904	5.41632		0.000927093
20170426	6.58	-2.84408	1.09894	7.53356	-5.82058	-3.50544	2.71134	0.052828	1.32041	0.593725	-0.229687	5.41447		5.78842
20170427	18	5.4922	2.55774	9.11039	-6.55692	-2.72906	2.88125	0.0463412	1.31036	0.597178	-0.231469	5.41261		17.1603
20170428	7.31	-4.10163	1.25757	8.89363	-7.00709	-1.89416	3.05026	0.0391435	1.30001	0.600593	-0.233247	5.41075		6.04957
20170429	3.61	-4.17948	-1.02912	6.71072	-7.09244	-1.019	3.21744	0.0312344	1.28935	0.603967	-0.235024	5.40889		1.50213
20170430	2.6	-1.51908	-1.99942	2.8366	-6.793	-0.120918	3.38185	0.022613	1.27839	0.607302	-0.236798	5.40704		-0.681902
20170501	2.6	0.917773	-1.04598	-2.35851	-6.09366	0.783619	3.54255	0.0132786	1.26714	0.610598	-0.23857	5.40518		-2.48671
20170502	2.11	1.43764	1.46148	-8.27228	-4.96785	1.67824	3.69859	0.00323027	1.25558	0.613854	-0.24034	5.40333		-5.37315
20170503	2.18	-0.155277	6.35802	-13.8395	-3.4008	2.54661	3.84905	-0.00753289	1.24374	0.617071	-0.242107	5.40147		-7.63672
20170504	11	3.63011	12.1692	-17.401	-1.43351	3.37263	3.99296	-0.0190119	1.2316	0.620248	-0.243871	5.39962		-1.60173
20170505	4.31	-2.46343	8.24863	-17.4287	0.858721	4.13998	4.12939	-0.0312076	1.21917	0.623385	-0.245634	5.39776		-11.6435
20170506	6.94	10.5442	-9.15483	-13.8147	3.34394	4.83226	4.25737	-0.0441208	1.20646	0.626484	-0.247394	5.39591		-12.4254
20170507	16.2	26.1831	-25.2214	-7.31775	5.85279	5.43306	4.37596	-0.0577511	1.19347	0.629543	-0.249151	5.39406		-6.35612
20170508	8.47	6.77156	-24.8913	1.0316	8.20449	5.92599	4.48421	-0.0720975	1.1802	0.632563	-0.250907	5.39221		-17.0882
20170509	4.31	-23.776	-9.51182	9.75723	10.2169	6.29463	4.58115	-0.0871585	1.16665	0.635543	-0.25266	5.39036		-23.5306
20170510	3.06	-58.5702	14.5681	17.2132	11.7079	6.52258	4.66586	-0.102932	1.15282	0.638485	-0.25441	5.38851		-26.7889
20170511	151	63.9269	34.9229	21.7376	12.4949	6.5937	4.73748	-0.119416	1.13872	0.641387	-0.256158	5.38666		120.587
20170512	23	-63.8871	34.7266	21.9619	12.4227	6.49675	4.79539	-0.136608	1.12436	0.64425	-0.257904	5.38481		-7.1986
20170513	7.69	-58.3112	18.9829	17.9421	11.4796	6.23718	4.83935	-0.154505	1.10973	0.647074	-0.259647	5.38296		-21.3862
20170514	0.64	-34.6957	-2.60632	11.0239	9.80108	5.83275	4.86956	-0.173105	1.09483	0.649859	-0.261388	5.38111		-26.2781
20170515	2.16	-3.74529	-21.3493	2.79739	7.55629	5.30385	4.8864	-0.192402	1.07968	0.652605	-0.263127	5.37926		-22.2972
20170516	2.99	16.9401	-30.0669	-5.17326	4.91539	4.67098	4.89033	-0.212389	1.06426	0.655312	-0.264863	5.37741		-18.3001
20170517	2.6	23.7861	-27.079	-11.5113	2.04722	3.95464	4.8818	-0.233054	1.04859	0.65798	-0.266596	5.37557		-14.8043
20170518	2.16	21.0237	-17.0832	-15.3356	-0.88593	3.17531	4.86125	-0.254382	1.03267	0.660609	-0.268328	5.37372		-11.395
20170519	0.799	12.721	-5.55116	-16.4274	-3.73138	2.35341	4.82914	-0.276354	1.0165	0.663199	-0.270057	5.37188		-9.25757
20170520	0.685	5.64523	3.9569	-15.1487	-6.35623	1.50905	4.78591	-0.298944	1.00008	0.665751	-0.271783	5.37003		-5.54653
20170521	2.23	1.44912	9.97342	-12.1244	-8.66177	0.662321	4.732	-0.32213	0.983419	0.668264	-0.273507	5.36819		-0.701892
20170522	2.49	-3.16296	13.6363	-8.21741	-10.5621	-0.166614	4.66785	-0.345883	0.966514	0.670737	-0.275229	5.36634		2.25598
20170523	10.6	2.06078	14.7989	-4.28077	-11.97	-0.957509	4.5939	-0.370173	0.94937	0.673173	-0.276948	5.3645		12.5789
20170524	7.31	-0.672459	12.3854	-0.858254	-12.803	-1.69031	4.51057	-0.394967	0.931989	0.675569	-0.278664	5.36266		10.8547
20170525	4.31	-1.1287	8.40178	1.64498	-13.0154	-2.34714	4.41831	-0.420226	0.914376	0.677927	-0.280379	5.36082		8.91806
20170526	2.99	-0.323787	5.30415	2.97993	-12.6156	-2.91579	4.31753	-0.445913	0.896531	0.680246	-0.28209	5.35898		7.96029
20170527	2.39	0.216508	3.95544	2.98163	-11.6366	-3.39057	4.20864	-0.471987	0.878458	0.682527	-0.2838	5.35713		7.15358
20170528	2.11	0.445612	3.45803	1.84368	-10.1424	-3.77254	4.09203	-0.49841	0.86016	0.684769	-0.285507	5.35529		5.74732
20170529	0.741	0.140969	2.43475	0.14452	-8.24033	-4.06585	3.96807	-0.525141	0.841639	0.686973	-0.287211	5.35346		2.72024
20170530	0.631	2.36175	-0.0174254	-1.39503	-6.05913	-4.27553	3.83714	-0.55214	0.822898	0.689138	-0.288913	5.35162		0.949298
20170531	0.58	5.20544	-4.18895	-2.14033	-3.73898	-4.40672	3.69964	-0.579365	0.80394	0.691264	-0.290613	5.34978		-1.12384
20170601	2	8.10193	-8.19437	-1.70336	-1.4079	-4.46445	3.55598	-0.606773	0.784767	0.693353	-0.29231	5.34794		-1.79579
20170602	0.631	4.0482	-8.6215	-0.0246929	0.841132	-4.45344	3.40658	-0.634319	0.765382	0.695403	-0.294004	5.3461		-4.598
20170603	0.485	-5.69811	-3.84676	2.3927	2.9428	-4.37805	3.25191	-0.661959	0.745789	0.697415	-0.295696	5.34427		-7.15216
20170604	0.58	-18.5317	5.18108	4.71538	4.83913	-4.24274	3.09244	-0.689649	0.725989	0.699388	-0.297386	5.34243		-8.63527
20170605	48	19.0507	12.0941	5.99268	6.46955	-4.05261	2.92866	-0.717345	0.705985	0.701323	-0.299073	5.34059		37.1375
20170606	9.69	-17.2384	8.7924	5.53527	7.7737	-3.81421	2.76104	-0.745001	0.68578	0.70322	-0.300758	5.33876		-2.91078
20170607	4.58	-12.9587	0.307367	3.7623	8.71227	-3.53551	2.59007	-0.772571	0.665378	0.705079	-0.30244	5.33693		-8.88902
20170608	2.85	-6.11004	-6.64252	1.40045	9.27742	-3.2252	2.4162	-0.800009	0.644779	0.7069	-0.30412	5.33509		-11.3521
20170609	2.6	-1.92263	-9.05325	-0.860847	9.48907	-2.89217	2.23987	-0.827268	0.623988	0.708682	-0.305797	5.33326		-11.8367
20170610	8.07	3.99055	-8.11822	-2.41713	9.38127	-2.54529	2.06154	-0.854306	0.603007	0.710427	-0.307472	5.33143		-6.5448
20170611	3.83	-2.11074	-5.71656	-2.7802	8.99005	-2.1936	1.88166	-0.881075	0.581838	0.712134	-0.309144	5.32959		-10.6075
20170612	11.5	4.58922	-4.73205	-1.96814	8.34529	-1.84566	1.70071	-0.907532	0.560485	0.713802	-0.310813	5.32776		-2.11098
20170613	10.1	0.324735	-2.78322	-0.535848	7.48689	-1.50788	1.51914	-0.933632	0.53895	0.715433	-0.312481	5.32593		-2.99434
20170614	6.58	-7.84306	1.64773	0.891544	6.46152	-1.18453	1.33743	-0.95933	0.517236	0.717026	-0.314145	5.3241		-5.30379
20170615	27.7	8.1892	6.71456	1.8388	5.31637	-0.878599	1.15599	-0.984581	0.495346	0.718581	-0.315807	5.32227		16.7426
20170616	10.6	-6.6736	5.75031	1.98295	4.09883	-0.591491	0.975223	-1.00934	0.473281	0.720098	-0.317467	5.32044		1.05966
20170617	8.07	-2.70371	0.956928	1.42066	2.85894	-0.323879	0.795524	-1.03356	0.451046	0.721577	-0.319124	5.31861		-0.326124
20170618	4.58	-0.866891	-2.18929	0.476019	1.64344	-0.0761522	0.617249	-1.0572	0.428642	0.723019	-0.320779	5.31679		-2.58016
20170619	2.23	-0.753558	-2.37015	-0.520586	0.494062	0.151354	0.440731	-1.08021	0.406073	0.724422	-0.322431	5.31496		-3.64429
20170620	3.06	0.368203	-1.14219	-1.26712	-0.550849	0.35802	0.266296	-1.10253	0.383341	0.725789	-0.32408	5.31313		-2.04111
20170621	2.72	0.521204	-0.200003	-1.55994	-1.45835	0.542857	0.0942667	-1.12413	0.36045	0.727117	-0.325727	5.31131		-1.23873
20170622	2.39	0.38906	-0.0412184	-1.37075	-2.20787	0.704603	-0.0750517	-1.14494	0.337401	0.728408	-0.327371	5.30948		-1.02291
20170623	0.868	-0.453985	-0.197778	-0.864222	-2.79508	0.842076	-0.241374	-1.16492	0.314198	0.729661	-0.329013	5.30766		-1.51599
20170624	1.72	-0.340378	-0.0346875	-0.274689	-3.22374	0.954621	-0.404434	-1.18402	0.290844	0.730877	-0.330653	5.30583		-0.649754
20170625	2.99	0.549202	0.357353	0.212799	-3.50502	1.04254	-0.563987	-1.20218	0.267341	0.732055	-0.332289	5.30401		1.11935
20170626	2.49	-0.203808	0.471373	0.513499	-3.65588	1.10695	-0.719795	-1.21935	0.243692	0.733196	-0.333923	5.30218		0.781063
20170627	2.23	0.42437	0.140177	0.635175	-3.69865	1.14981	-0.87165	-1.23547	0.219899	0.7343	-0.335555	5.30036		1.19972
20170628	0.93	-0.214369	-0.319222	0.624022	-3.65854	1.17358	-1.01939	-1.25048	0.195967	0.735366	-0.337184	5.29854		0.0904314
20170629	0.631	-0.551835	-0.347562	0.526462	-3.55695	1.18089	-1.16288	-1.26433	0.171897	0.736394	-0.338811	5.29672		-0.372935
20170630	2	0.112033	0.14182	0.355378	-3.4107	1.17429	-1.302	-1.27696	0.147692	0.737386	-0.340435	5.2949		0.609231
20170701	2.31	0.859752	0.495532	0.131227	-3.23471	1.156	-1.43669	-1.2883	0.123356	0.73834	-0.342056	5.29308		1.48651
20170702	0.485	-0.463441	0.266337	-0.102341	-3.04119	1.12822	-1.56691	-1.29829	0.0988903	0.739257	-0.343675	5.29126		-0.299445
20170703	0.398	-0.223162	-0.207784	-0.29098	-2.83946	1.09288	-1.69259	-1.30687	0.0742992	0.740137	-0.345291	5.28944		-0.721926
20170704	0.485	0.416829	-0.524789	-0.382646	-2.63528	1.05172	-1.81365	-1.31397	0.0495852	0.740979	-0.346904	5.28762		-0.490606
20170705	0.398	0.038398	-0.575902	-0.360542	-2.43109	1.00633	-1.93007	-1.31953	0.0247514	0.741785	-0.348515	5.2858		-0.898046
20170706	0.324	-0.0936891	-0.395769	-0.256586	-2.22907	0.957854	-2.04188	-1.32349	-0.000199277	0.742553	-0.350124	5.28398		-0.746044
20170707	0.485	-0.725511	0.0925294	-0.136602	-2.03005	0.907235	-2.14919	-1.32576	-0.0252636	0.743284	-0.35173	5.28217		-0.769583
20170708	2.49	0.820734	0.71845	-0.0571215	-1.83555	0.855183	-2.25211	-1.3263	-0.0504383	0.743979	-0.353333	5.28035		1.48206
20170709	2.23	0.507782	0.760002	-0.0521248	-1.64838	0.802163	-2.35078	-1.32502	-0.0757201	0.744636	-0.354933	5.27853		1.21566
20170710	0.741	-0.700014	0.150539	-0.108362	-1.47012	0.748444	-2.44536	-1.32187	-0.101106	0.745256	-0.356531	5.27672		-0.657837
20170711	0.58	-0.0240501	-0.32565	-0.177209	-1.30089	0.693683	-2.53599	-1.31677	-0.126592	0.74584	-0.358127	5.2749		-0.526908
20170712	0.868	0.171878	-0.327048	-0.19798	-1.14003	0.637364	-2.6228	-1.30965	-0.152175	0.746387	-0.359719	5.27309		-0.35315
20170713	0.36	0.0581574	-0.280297	-0.135046	-0.987304	0.579093	-2.70593	-1.30045	-0.177851	0.746896	-0.36131	5.27128		-0.357186
20170714	0.324	-0.215026	-0.291327	-0.00928188	-0.844054	0.518672	-2.78553	-1.2891	-0.203618	0.747369	-0.362897	5.26946		-0.515635
20170715	0.995	-0.396554	0.00920098	0.126699	-0.712347	0.456231	-2.86174	-1.27552	-0.229472	0.747806	-0.364482	5.26765		-0.260653
20170716	2.12	0.410706	0.501553	0.219276	-0.594599	0.392121	-2.93469	-1.25966	-0.255408	0.748205	-0.366064	5.26584		1.13154
20170717	1.93	0.601012	0.495098	0.237268	-0.492878	0.326925	-3.00448	-1.24143	-0.281425	0.748568	-0.367644	5.26403		1.33338
20170718	0.44	-0.307345	-0.0179935	0.184236	-0.408068	0.261292	-3.07127	-1.22078	-0.307518	0.748894	-0.369221	5.26222		-0.141102
20170719	0.324	-0.377146	-0.35288	0.0904472	-0.340452	0.196031	-3.13524	-1.19764	-0.333683	0.749184	-0.370795	5.26041		-0.639579
20170720	0.299	-0.343388	-0.343963	-0.00740529	-0.289825	0.132122	-3.19658	-1.17194	-0.359918	0.749437	-0.372367	5.2586		-0.694756
20170721	1.64	0.856683	-0.17005	-0.0754216	-0.256025	0.0707868	-3.25544	-1.14364	-0.386218	0.749654	-0.373936	5.25679		0.611212
20170722	0.324	-0.218805	-0.0226235	-0.0946812	-0.237869	0.0132636	-3.312	-1.11267	-0.41258	0.749834	-0.375502	5.25498		-0.33611
20170723	0.236	-0.441957	0.223316	-0.0723712	-0.233264	-0.0392892	-3.36642	-1.07899	-0.439001	0.749978	-0.377066	5.25317		-0.291012
20170724	1.2	0.565583	0.349957	-0.027796	-0.238887	-0.0859116	-3.41888	-1.04256	-0.465475	0.750085	-0.378627	5.25137		0.887744
20170725	0.21	-0.0720004	0.101175	0.0255172	-0.251053	-0.125748	-3.46958	-1.00333	-0.492	0.750156	-0.380185	5.24956		0.0546914
20170726	0.186	-0.221832	-0.153401	0.0767733	-0.265369	-0.15805	-3.51872	-0.961262	-0.518569	0.75019	-0.381741	5.24776		-0.29846
20170727	0.141	0.133884	-0.169242	0.0992815	-0.276852	-0.182209	-3.56644	-0.916321	-0.54518	0.750188	-0.383294	5.24595		0.0639236
20170728	0.124	0.0301793	-0.0940006	0.0746489	-0.28062	-0.197727	-3.61286	-0.868485	-0.571827	0.75015	-0.384845	5.24414		0.0108275
20170729	0.141	0.155045	-0.0353364	0.00484972	-0.273357	-0.204262	-3.65815	-0.817739	-0.598506	0.750076	-0.386392	5.24234		0.124559
20170730	0.141	0.0775039	-0.0175078	-0.0951769	-0.253139	-0.201795	-3.70249	-0.76408	-0.625212	0.749965	-0.387937	5.24054		-0.0351808
20170731	0.124	-0.105354	0.0209028	-0.202872	-0.219373	-0.190789	-3.74606	-0.70751	-0.651939	0.749819	-0.38948	5.23873		-0.287323
20170801	0.124	0.0192434	0.0456791	-0.287518	-0.172864	-0.172248	-3.78894	-0.648038	-0.678683	0.749636	-0.391019	5.23693		-0.222596
20170802	0.141	-0.156291	0.0147166	-0.328597	-0.114746	-0.147728	-3.83119	-0.585679	-0.705439	0.749417	-0.392556	5.23513		-0.470171
20170803	0.124	0.147471	-0.0161821	-0.319494	-0.0471439	-0.119157	-3.8728	-0.520456	-0.7322	0.749162	-0.394091	5.23333		-0.188205
20170804	0.186	0.0168748	-0.0615652	-0.264169	0.0265395	-0.0885125	-3.91371	-0.452401	-0.758963	0.748871	-0.395622	5.23153		-0.308859
20170805	0.292	-0.234103	-0.0797736	-0.161437	0.10204	-0.0578292	-3.95381	-0.381555	-0.785721	0.748545	-0.397151	5.22973		-0.475314
20170806	0.398	0.0688051	0.0206938	-0.0303097	0.174211	-0.0289727	-3.99295	-0.307967	-0.812468	0.748182	-0.398677	5.22793		0.0591892
20170807	1.42	0.373997	0.122894	0.0886958	0.237396	-0.00340567	-4.03093	-0.2317	-0.839199	0.747783	-0.4002	5.22613		0.585587
20170808	0.292	-0.671894	0.155413	0.161923	0.286763	0.0179645	-4.06747	-0.152824	-0.86591	0.747349	-0.401721	5.22433		-0.354559
20170809	2.16	0.762061	0.127386	0.166648	0.319496	0.0347115	-4.10225	-0.0714141	-0.892593	0.746878	-0.403239	5.22253		1.05609
20170810	0.58	-0.504952	0.107761	0.112446	0.333155	0.0467983	-4.13489	0.0124502	-0.919244	0.746372	-0.404754	5.22074		-0.284746
20170811	0.389	-0.589387	0.0935252	0.0248506	0.325931	0.0546711	-4.16497	0.0986833	-0.945857	0.74583	-0.406267	5.21894		-0.471011
20170812	1.79	1.08601	0.0583186	-0.0760564	0.299039	0.0589795	-4.192	0.18719	-0.972426	0.745253	-0.407777	5.21714		1.06827
20170813	0.398	-0.441787	-0.100686	-0.156066	0.255457	0.0606159	-4.21543	0.277866	-0.998946	0.744639	-0.409284	5.21535		-0.698539
20170814	0.324	0.218744	-0.312166	-0.189258	0.198217	0.060864	-4.23473	0.370599	-1.02541	0.74399	-0.410788	5.21355		-0.28268
20170815	0.292	-0.0233119	-0.405345	-0.16253	0.129327	0.0611758	-4.24932	0.465271	-1.05182	0.743306	-0.41229	5.21176		-0.591188
20170816	0.264	-0.156285	-0.274326	-0.0932937	0.0483396	0.0630416	-4.25862	0.561761	-1.07816	0.742586	-0.413789	5.20996		-0.523906
20170817	1.5	0.644763	0.0768841	-0.020884	-0.0476626	0.0680516	-4.26201	0.659942	-1.10442	0.74183	-0.415285	5.20817		0.700763
20170818	0.264	-0.908006	0.429803	0.00267313	-0.162775	0.0777341	-4.25888	0.759688	-1.13061	0.741039	-0.416778	5.20638		-0.47553
20170819	2	1.01144	0.446556	-0.0487822	-0.302544	0.0933892	-4.2486	0.86087	-1.15672	0.740213	-0.418269	5.20459		1.40921
20170820	0.236	-0.554295	0.104078	-0.15732	-0.470805	0.115664	-4.2305	0.963355	-1.18274	0.739351	-0.419757	5.2028		-0.607538
20170821	0.236	-0.178021	-0.234437	-0.265955	-0.669724	0.144473	-4.2039	1.06701	-1.20867	0.738454	-0.421242	5.201		-0.678413
20170822	0.21	0.223808	-0.334438	-0.302999	-0.89902	0.178689	-4.16807	1.17171	-1.23449	0.737521	-0.422724	5.19921		-0.413629
20170823	0.21	0.305616	-0.238763	-0.214034	-1.15316	0.215856	-4.12234	1.27732	-1.26021	0.736553	-0.424204	5.19742		-0.14718
20170824	0.186	-0.328755	-0.0612093	0.00351854	-1.41906	0.252702	-4.06605	1.38371	-1.28582	0.73555	-0.42568	5.19564		-0.386446
20170825	0.236	-0.417816	0.142769	0.308575	-1.67572	0.285472	-3.99867	1.49073	-1.31132	0.734511	-0.427154	5.19385		0.0335277
20170826	2.11	0.942474	0.194798	0.633745	-1.89874	0.309909	-3.91971	1.59825	-1.33669	0.733438	-0.428626	5.19206		1.77102
20170827	0.485	-0.722211	-0.145201	0.914143	-2.06371	0.321354	-3.82877	1.70614	-1.36193	0.732329	-0.430094	5.19027		0.046731
20170828	0.324	-0.353027	-0.634092	1.08095	-2.14529	0.315038	-3.72551	1.81426	-1.38704	0.731185	-0.43156	5.18848		0.0938332
20170829	0.292	-0.0893297	-1.14942	1.05291	-2.1193	0.286699	-3.60968	1.92247	-1.41201	0.730006	-0.433023	5.1867		-0.185844
20170830	1.5	1.41939	-1.58769	0.755239	-1.96573	0.233307	-3.48119	2.03064	-1.43684	0.728792	-0.434483	5.18491		0.586938
20170831	0.294	-0.169193	-0.93371	0.121255	-1.66931	0.153269	-3.34009	2.13864	-1.46151	0.727543	-0.43594	5.18313		-0.981648
20170901	0.58	-2.05504	1.61946	-0.790514	-1.22334	0.0465508	-3.18654	2.24632	-1.48603	0.726259	-0.437394	5.18134		-1.22609
20170902	8.47	2.42611	4.87584	-1.77403	-0.626867	-0.0854036	-3.02082	2.35355	-1.51038	0.72494	-0.438846	5.17956		5.52792
20170903	6.58	-0.415152	5.64652	-2.60394	0.114719	-0.239865	-2.84332	2.46019	-1.53457	0.723587	-0.440295	5.17778		2.62743
20170904	3.61	-0.558143	3.13975	-3.09728	0.983673	-0.413033	-2.65454	2.56611	-1.55858	0.722198	-0.441741	5.17599		-0.515674
20170905	2.23	1.39585	-1.61622	-3.09944	1.9453	-0.600728	-2.45505	2.67117	-1.58241	0.720775	-0.443184	5.17421		-3.31982
20170906	2.39	5.27727	-6.9468	-2.37373	2.94771	-0.798861	-2.2455	2.77523	-1.60606	0.719316	-0.444624	5.17243		-4.04326
20170907	2.23	5.23049	-9.81716	-0.781643	3.92221	-1.0035	-2.02663	2.87815	-1.62952	0.717823	-0.446062	5.17065		-5.36831
20170908	2.06	-0.741528	-6.92148	1.44974	4.78745	-1.21081	-1.7992	2.9798	-1.65278	0.716296	-0.447497	5.16887		-6.21327
20170909	0.631	-14.749	2.36778	3.70399	5.45537	-1.41687	-1.56408	3.08004	-1.67584	0.714733	-0.448929	5.16709		-8.67721
20170910	42.4	16.033	11.3156	5.19842	5.83695	-1.61754	-1.32216	3.17874	-1.69869	0.713136	-0.450358	5.16531		32.547
20170911	12	-14.2981	10.8042	5.27043	5.85411	-1.80819	-1.07438	3.27576	-1.72133	0.711505	-0.451784	5.16353		1.77657
20170912	4.58	-13.0661	4.1716	3.93947	5.47802	-1.98425	-0.821664	3.37096	-1.74375	0.709839	-0.453207	5.16175		-4.955
20170913	2.85	-4.71288	-3.01886	1.78523	4.73025	-2.14167	-0.564946	3.46422	-1.76594	0.708138	-0.454628	5.15997		-5.94651
20170914	2.31	1.26343	-6.8451	-0.517169	3.64775	-2.27678	-0.305172	3.5554	-1.7879	0.706403	-0.456045	5.1582		-6.09884
20170915	2.11	3.86473	-6.77006	-2.30634	2.26993	-2.3858	-0.0433069	3.64435	-1.80963	0.704633	-0.45746	5.15642		-5.21166
20170916	0.799	2.64333	-4.64533	-2.99784	0.641847	-2.46489	0.219666	3.73095	-1.83111	0.70283	-0.458872	5.15464		-4.99983
20170917	0.531	0.664747	-2.00294	-2.44975	-1.16661	-2.50981	0.482741	3.81506	-1.85234	0.700991	-0.460281	5.15287		-3.78794
20170918	0.58	-2.0853	1.09221	-1.04143	-3.05073	-2.51573	0.744897	3.89654	-1.87332	0.699118	-0.461688	5.15109		-2.03452
20170919	7.69	2.06455	3.57751	0.707753	-4.88267	-2.47751	1.0051	3.97526	-1.89403	0.697212	-0.463091	5.14932		6.34981
20170920	4.86	-1.18033	3.82016	2.25504	-6.52746	-2.38993	1.26231	4.05109	-1.91448	0.69527	-0.464492	5.14755		4.89487
20170921	4.31	-0.257341	2.84172	3.07732	-7.85734	-2.24782	1.51548	4.12388	-1.93465	0.693295	-0.465889	5.14577		5.66171
20170922	3.06	-0.460022	2.19052	2.80558	-8.77072	-2.04646	1.76359	4.19351	-1.95455	0.691285	-0.467284	5.144		4.53608
20170923	2.49	-0.145409	2.66867	1.30021	-9.21714	-1.78306	2.00562	4.25984	-1.97416	0.689241	-0.468676	5.14223		3.82346
20170924	2.49	0.212297	4.18845	-1.20144	-9.18658	-1.45841	2.24057	4.32272	-1.99349	0.687164	-0.470065	5.14046		3.19931
20170925	2.23	0.25582	5.76711	-4.11097	-8.68408	-1.0781	2.46744	4.38204	-2.01252	0.685052	-0.471451	5.13869		1.91196
20170926	2.23	1.0759	5.94224	-6.66921	-7.71903	-0.651379	2.68521	4.43765	-2.03124	0.682906	-0.472834	5.13692		0.348932
20170927	1.42	2.65976	3.00691	-8.16843	-6.31201	-0.188591	2.89288	4.48941	-2.04966	0.680726	-0.474214	5.13515		-2.50175
20170928	0.799	5.89684	-3.81047	-8.18496	-4.51563	0.299679	3.08947	4.5372	-2.06777	0.678512	-0.475592	5.13338		-6.09859
20170929	2.11	12.2413	-12.7437	-6.70003	-2.42389	0.802581	3.27398	4.58088	-2.08556	0.676264	-0.476966	5.13161		-7.20244
20170930	3.06	14.591	-19.8191	-3.90185	-0.156217	1.3091	3.44541	4.62031	-2.10303	0.673982	-0.478338	5.12984		-9.12988
20171001	2.72	7.67555	-19.9451	-0.236752	2.15453	1.80818	3.60277	4.65536	-2.12017	0.671666	-0.479707	5.12808		-12.5063
20171002	2.39	-9.82885	-9.67162	3.66859	4.37263	2.28879	3.74505	4.68589	-2.13697	0.669317	-0.481072	5.12631		-15.8319
20171003	2.16	-34.2244	8.78739	7.11369	6.36225	2.73987	3.87126	4.71177	-2.15344	0.666934	-0.482435	5.12454		-18.3233
20171004	27.6	-31.6711	26.8801	9.36339	7.98846	3.15038	3.98041	4.73287	-2.16956	0.664517	-0.483795	5.12278		4.57239
20171005	104	37.3481	32.709	9.6737	9.13279	3.50928	4.07148	4.74906	-2.18533	0.662066	-0.485152	5.12101		79.7308
20171006	16.2	-35.0637	18.2284	7.62241	9.74679	3.80586	4.14349	4.76023	-2.20075	0.659582	-0.486506	5.11925		-9.21285
20171007	10.255	-13.9296	-6.02277	4.07472	9.85867	4.03156	4.19542	4.76625	-2.2158	0.657064	-0.487857	5.11748		-15.8776
20171008	4.31	3.97511	-25.8646	0.223623	9.51358	4.18302	4.22639	4.76707	-2.2305	0.654512	-0.489205	5.11572		-21.6658
20171009	3.06	11.3452	-30.5192	-2.79966	8.76954	4.26158	4.23581	4.76263	-2.24482	0.651927	-0.490551	5.11396		-21.9736
20171010	2.72	-0.789323	-15.8298	-4.27581	7.68756	4.27098	4.22349	4.75291	-2.25877	0.649308	-0.491893	5.1122		-20.895
20171011	3.83	-22.2122	8.37998	-4.40092	6.33089	4.21619	4.18964	4.73791	-2.27234	0.646656	-0.493232	5.11043		-18.2332
20171012	58.9	19.3171	22.7347	-3.5809	4.77679	4.10249	4.13474	4.71767	-2.28553	0.643971	-0.494569	5.10867		38.4709
20171013	16.2	-16.9611	16.6699	-2.26003	3.11242	3.9352	4.05953	4.69226	-2.29834	0.641252	-0.495902	5.10691		-2.55122
20171014	16.8	-1.20843	2.48723	-0.973316	1.43291	3.71959	3.9649	4.66174	-2.31076	0.6385	-0.497233	5.10515		0.305481
20171015	13.5	6.44174	-7.17937	-0.300875	-0.166822	3.46082	3.85187	4.62623	-2.3228	0.635714	-0.49856	5.10339		-1.03851
20171016	7.31	3.47195	-8.43166	-0.652827	-1.60769	3.16398	3.72154	4.58582	-2.33444	0.632895	-0.499885	5.10164		-5.61253
20171017	4.86	0.553978	-5.02426	-1.77707	-2.84302	2.83404	3.57507	4.54062	-2.34569	0.630043	-0.501206	5.09988		-6.24735
20171018	6.58	1.88469	-1.59172	-2.96271	-3.85332	2.47587	3.41365	4.49074	-2.35654	0.627157	-0.502525	5.09812		-2.66974
20171019	4.86	0.467945	-0.0851443	-3.57656	-4.63617	2.09439	3.23845	4.43629	-2.36699	0.624239	-0.503841	5.09636		-3.19376
20171020	3.06	-0.350604	0.196432	-3.44642	-5.19981	1.69468	3.05067	4.37739	-2.37704	0.621287	-0.505153	5.09461		-3.60059
20171021	3.06	0.0843063	0.230391	-2.76151	-5.55845	1.28229	2.8515	4.31416	-2.38668	0.618302	-0.506463	5.09285		-2.44681
20171022	3.06	-0.38532	0.296117	-1.84782	-5.73717	0.863117	2.64215	4.2467	-2.39593	0.615284	-0.50777	5.0911		-1.93703
20171023	3.41	0.241497	0.230133	-1.00629	-5.76476	0.44325	2.42381	4.17513	-2.40476	0.612233	-0.509073	5.08934		-0.534665
20171024	3.06	-0.0669834	0.151865	-0.41067	-5.6731	0.0289382	2.19768	4.09958	-2.41319	0.609149	-0.510374	5.08759		-0.325788
20171025	2.72	-0.135386	0.168851	-0.0959341	-5.49532	-0.373479	1.96498	4.02015	-2.42121	0.606033	-0.511672	5.08583		-0.062469
20171026	2.6	0.0119988	0.199585	0.00268276	-5.25829	-0.757843	1.72691	3.93695	-2.42881	0.602883	-0.512966	5.08408		0.214267
20171027	2.6	0.504614	0.120507	-0.0169836	-4.98091	-1.11877	1.48467	3.85012	-2.436	0.5997	-0.514258	5.08233		0.608137
20171028	0.93	-0.67753	-0.114391	-0.0491693	-4.67797	-1.45172	1.23947	3.75976	-2.44278	0.596484	-0.515547	5.08058		-0.841091
20171029	0.799	0.0299301	-0.206227	-0.0245678	-4.36011	-1.75259	0.992494	3.66598	-2.44914	0.593236	-0.516832	5.07883		-0.200865
20171030	0.685	-0.307779	0.0424084	0.0640316	-4.03208	-2.01816	0.744922	3.56891	-2.45507	0.589955	-0.518115	5.07708		-0.201339
20171031	2.23	0.647206	0.337574	0.205125	-3.69312	-2.24655	0.497879	3.46865	-2.46059	0.586641	-0.519395	5.07533		1.1899
20171101	0.868	-0.111777	0.373041	0.374927	-3.34048	-2.43704	0.252434	3.36533	-2.46569	0.583295	-0.520671	5.07358		0.636192
20171102	0.799	-0.00250864	0.170304	0.54011	-2.97262	-2.5897	0.00961237	3.25906	-2.47036	0.579915	-0.521945	5.07183		0.707905
20171103	0.741	-0.00345046	-0.0729089	0.673203	-2.59058	-2.70533	-0.229602	3.14995	-2.47461	0.576503	-0.523215	5.07008		0.596844
20171104	0.685	-0.37738	-0.0580171	0.756702	-2.19618	-2.78553	-0.464255	3.03813	-2.47842	0.573059	-0.524483	5.06833		0.321305
20171105	0.685	-0.316852	0.23604	0.785464	-1.79215	-2.83275	-0.693428	2.9237	-2.48181	0.569582	-0.525747	5.06658		0.704652
20171106	2.12	0.808737	0.352093	0.774149	-1.38261	-2.84972	-0.916234	2.80678	-2.48477	0.566073	-0.527009	5.06484		1.93498
20171107	0.631	-0.413693	-0.0657397	0.757865	-0.974101	-2.83928	-1.13182	2.6875	-2.48729	0.562531	-0.528267	5.06309		0.278433
20171108	0.58	-0.0596592	-0.654188	0.770314	-0.575629	-2.80417	-1.33934	2.56595	-2.48938	0.558956	-0.529522	5.06135		0.0564664
20171109	0.93	0.0323825	-0.731109	0.832919	-0.19732	-2.74694	-1.53801	2.44227	-2.49103	0.555349	-0.530775	5.0596		0.134193
20171110	0.58	-0.43025	-0.163876	0.943667	0.149823	-2.66966	-1.72707	2.31656	-2.49224	0.55171	-0.532024	5.05786		0.349541
20171111	2.205	0.0315553	0.522146	1.05748	0.456729	-2.57404	-1.90578	2.18894	-2.49301	0.548039	-0.53327	5.05611		1.61119
20171112	3.83	1.1183	0.670402	1.12266	0.717216	-2.46182	-2.07347	2.05952	-2.49334	0.544335	-0.534513	5.05437		2.91136
20171113	1.79	-0.474951	0.162484	1.11389	0.926885	-2.33483	-2.22952	1.92841	-2.49323	0.540599	-0.535753	5.05263		0.801427
20171114	1.13	-0.784493	-0.309806	1.0408	1.08388	-2.19476	-2.37339	1.79574	-2.49267	0.53683	-0.53699	5.05089		-0.0535026
20171115	2.23	0.786054	-0.335177	0.933799	1.18977	-2.04305	-2.50465	1.66159	-2.49166	0.53303	-0.538224	5.04915		1.38468
20171116	1.35	0.0103712	-0.107622	0.818808	1.25028	-1.88127	-2.62295	1.52608	-2.4902	0.529197	-0.539455	5.04741		0.721557
20171117	0.799	-0.742662	0.0735602	0.716521	1.27394	-1.71127	-2.72804	1.38931	-2.48829	0.525333	-0.540682	5.04566		0.0474192
20171118	2.31	1.03098	0.130468	0.641194	1.26958	-1.53503	-2.81976	1.25139	-2.48593	0.521436	-0.541907	5.04393		1.80264
20171119	0.93	-0.519556	0.100396	0.574567	1.24567	-1.3548	-2.89806	1.1124	-2.48311	0.517507	-0.543128	5.04219		0.155408
20171120	0.799	-0.391078	0.148798	0.491171	1.21015	-1.17279	-2.96294	0.972456	-2.47984	0.513546	-0.544347	5.04045		0.248891
20171121	1.93	0.741272	0.169101	0.40012	1.17042	-0.99116	-3.01445	0.831663	-2.4761	0.509554	-0.545562	5.03871		1.31049
20171122	0.485	-0.68012	-0.0522728	0.327336	1.13315	-0.811925	-3.05269	0.690123	-2.47191	0.505529	-0.546774	5.03697		-0.405057
20171123	0.44	0.159974	-0.34804	0.298251	1.10356	-0.636907	-3.07782	0.547941	-2.46724	0.501472	-0.547983	5.03524		0.110185
20171124	0.44	0.228831	-0.474064	0.326602	1.08471	-0.467671	-3.09002	0.405222	-2.46212	0.497384	-0.549189	5.0335		0.0813681
20171125	0.44	-0.373033	-0.275324	0.397187	1.07716	-0.305614	-3.08958	0.262072	-2.45652	0.493264	-0.550392	5.03176		-0.251169
20171126	0.398	-0.452435	0.208992	0.461195	1.07879	-0.151949	-3.07679	0.118602	-2.45046	0.489112	-0.551592	5.03003		0.217752
20171127	1.93	0.419373	0.621211	0.469662	1.08716	-0.00758473	-3.052	-0.025079	-2.44392	0.484928	-0.552789	5.02829		1.51025
20171128	1.79	0.473167	0.582484	0.406046	1.10013	0.126813	-3.01559	-0.168857	-2.4369	0.480713	-0.553982	5.02656		1.4617
20171129	0.44	-0.670909	0.142766	0.284857	1.11527	0.250739	-2.96798	-0.31262	-2.42941	0.476466	-0.555173	5.02483		-0.243286
20171130	0.485	-0.00522522	-0.302504	0.147493	1.12998	0.363996	-2.90959	-0.456254	-2.42144	0.472187	-0.55636	5.02309		-0.160236
20171201	0.398	0.115118	-0.522195	0.0529404	1.14181	0.466612	-2.84091	-0.599644	-2.41299	0.467877	-0.557544	5.02136		-0.354137
20171202	0.398	0.344353	-0.461367	0.0422738	1.14819	0.558757	-2.76239	-0.742672	-2.40405	0.463535	-0.558725	5.01963		-0.0747408
20171203	0.44	-0.0541905	-0.19933	0.0995429	1.1469	0.640828	-2.67455	-0.885221	-2.39463	0.459162	-0.559903	5.0179		-0.153977
20171204	0.398	-0.598899	0.19282	0.172755	1.13687	0.713294	-2.5779	-1.02717	-2.38471	0.454757	-0.561078	5.01617		-0.233324
20171205	2	0.600547	0.473995	0.206483	1.11758	0.776544	-2.473	-1.1684	-2.3743	0.450321	-0.562249	5.01444		1.28102
20171206	1.64	0.191761	0.320721	0.164813	1.08829	0.830874	-2.36039	-1.3088	-2.3634	0.445853	-0.563418	5.01271		0.677295
20171207	0.398	-0.533033	-0.0325756	0.054231	1.04925	0.876552	-2.24067	-1.44823	-2.35199	0.441354	-0.564583	5.01098		-0.511378
20171208	0.36	-0.0396106	-0.187732	-0.0868882	1.00229	0.913966	-2.11441	-1.5866	-2.34009	0.436824	-0.565745	5.00925		-0.314231
20171209	0.398	0.146051	-0.158195	-0.209126	0.950161	0.943618	-1.98224	-1.72377	-2.32768	0.432262	-0.566904	5.00753		-0.22127
20171210	0.36	-0.164744	-0.161727	-0.262094	0.895748	0.966077	-1.84479	-1.85963	-2.31476	0.427669	-0.56806	5.0058		-0.588565
20171211	0.36	0.201895	-0.222694	-0.222558	0.841521	0.981942	-1.70271	-1.99406	-2.30133	0.423045	-0.569212	5.00407		-0.243357
20171212	0.292	-0.0299497	-0.182816	-0.107365	0.788981	0.991772	-1.55665	-2.12694	-2.2874	0.41839	-0.570362	5.00235		-0.32013
20171213	0.324	-0.166101	0.0739561	0.031439	0.739596	0.996133	-1.40727	-2.25816	-2.27294	0.413704	-0.571508	5.00062		-0.0607056
20171214	0.36	-0.41138	0.390985	0.131663	0.69374	0.995564	-1.25522	-2.38759	-2.25797	0.408986	-0.572651	4.9989		0.111268
20171215	1.72	0.801416	0.446447	0.151535	0.650793	0.990608	-1.10113	-2.51512	-2.24248	0.404238	-0.573791	4.99717		1.3994
20171216	0.36	-0.431011	0.135586	0.0884493	0.610445	0.981861	-0.945607	-2.64063	-2.22646	0.399458	-0.574928	4.99545		-0.206975
20171217	0.324	-0.328986	-0.188215	-0.0178126	0.572182	0.969893	-0.789257	-2.764	-2.20992	0.394648	-0.576061	4.99373		-0.535014
20171218	0.324	0.120439	-0.241666	-0.102968	0.535202	0.955256	-0.63266	-2.88512	-2.19286	0.389806	-0.577192	4.992		-0.224195
20171219	0.292	0.0887706	-0.15478	-0.125896	0.498058	0.938493	-0.476388	-3.00386	-2.17526	0.384934	-0.578319	4.99028		-0.191906
20171220	0.264	0.197569	-0.0853452	-0.0836868	0.459645	0.920059	-0.321006	-3.12012	-2.15713	0.380031	-0.579443	4.98856		0.0285372
20171221	0.36	-0.0510058	0.00570231	0.00591837	0.419397	0.900307	-0.167062	-3.23377	-2.13847	0.375096	-0.580563	4.98684		-0.0393851
20171222	0.36	-0.679037	0.183058	0.110286	0.37688	0.879562	-0.0150836	-3.3447	-2.11928	0.370131	-0.581681	4.98512		-0.385694
20171223	1.79	1.14985	0.246844	0.198522	0.332101	0.858066	0.134427	-3.45279	-2.09955	0.365136	-0.582795	4.9834		1.59522
20171224	0.324	-0.696587	-0.00606794	0.246426	0.285488	0.835977	0.280994	-3.55793	-2.07928	0.360109	-0.583906	4.98168		-0.456228
20171225	0.264	-0.00268822	-0.293924	0.24277	0.238454	0.813375	0.424174	-3.66	-2.05848	0.355052	-0.585014	4.97996		-0.0538429
20171226	0.264	-0.060879	-0.311576	0.188117	0.192578	0.790312	0.563555	-3.75888	-2.03713	0.349964	-0.586118	4.97825		-0.184338
20171227	0.264	0.183133	-0.104097	0.09516	0.149429	0.766885	0.698739	-3.85447	-2.01524	0.344846	-0.58722	4.97653		0.174196
20171228	0.264	-0.114592	0.113605	-0.0170235	0.110707	0.743154	0.82933	-3.94665	-1.9928	0.339697	-0.588318	4.97481		-0.0180112
20171229	0.264	0.0216633	0.152361	-0.119821	0.0782205	0.719081	0.954945	-4.03531	-1.96982	0.334517	-0.589413	4.9731		0.0542036
20171230	0.264	-0.00340919	0.0457107	-0.197623	0.0530239	0.694494	1.07523	-4.12034	-1.94629	0.329307	-0.590505	4.97138		-0.155321
20171231	0.292	0.104862	-0.0316298	-0.239155	0.0355784	0.669138	1.18988	-4.20164	-1.92221	0.324067	-0.591593	4.96967		-0.165923
20180101	0.292	0.0367082	-0.0347214	-0.236893	0.0255461	0.642716	1.29864	-4.27912	-1.89758	0.318796	-0.592678	4.96795		-0.234906
20180102	0.44	0.0896138	-0.0659425	-0.190438	0.0209105	0.615043	1.40127	-4.35268	-1.8724	0.313494	-0.59376	4.96624		-0.166767
20180103	0.292	0.0872732	-0.230324	-0.104942	0.0187521	0.586037	1.49759	-4.42223	-1.84667	0.308163	-0.594839	4.96452		-0.247993
20180104	0.324	-0.0731421	-0.360595	0.00673594	0.0166387	0.555717	1.58742	-4.4877	-1.82037	0.302801	-0.595914	4.96281		-0.427001
20180105	0.44	0.0639048	-0.10157	0.11879	0.0129018	0.524139	1.67065	-4.54902	-1.79353	0.297408	-0.596986	4.9611		0.0811255
20180106	0.36	-0.482648	0.359748	0.200928	0.0072689	0.49137	1.74718	-4.60612	-1.76612	0.291985	-0.598055	4.95939		0.078027
20180107	1.86	0.709675	0.522276	0.230856	8.41174e-05	0.457497	1.81692	-4.65893	-1.73816	0.286533	-0.599121	4.95768		1.46281
20180108	0.58	-0.325166	0.248827	0.202521	-0.0082158	0.422724	1.87979	-4.7074	-1.70963	0.28105	-0.600183	4.95597		0.126182
20180109	0.531	-0.110675	-0.139662	0.125089	-0.0174193	0.387331	1.93572	-4.75149	-1.68055	0.275537	-0.601242	4.95426		-0.125249
20180110	0.44	0.134951	-0.270971	0.0263518	-0.0274	0.351573	1.98461	-4.79113	-1.6509	0.269993	-0.602298	4.95255		-0.109668
20180111	0.36	0.195159	-0.186921	-0.0670689	-0.0378246	0.315658	2.02639	-4.82628	-1.62071	0.26442	-0.60335	4.95084		-0.0588309
20180112	0.485	-0.0409804	-0.117085	-0.133863	-0.0483507	0.279784	2.06095	-4.85689	-1.58996	0.258817	-0.6044	4.94913		-0.291928
20180113	0.485	-0.0647113	-0.0595306	-0.156606	-0.058695	0.244179	2.08821	-4.88294	-1.55866	0.253184	-0.605445	4.94742		-0.280848
20180114	0.398	-0.00208329	0.0401289	-0.13643	-0.0680154	0.209082	2.1081	-4.90438	-1.52682	0.247521	-0.606488	4.94572		-0.098384
20180115	0.292	0.127578	0.145718	-0.0957455	-0.0751767	0.174828	2.12055	-4.92117	-1.49444	0.241828	-0.607527	4.94401		0.17755
20180116	0.324	0.146799	0.159561	-0.0535046	-0.0793853	0.141804	2.1255	-4.93328	-1.46153	0.236105	-0.608563	4.9423		0.252856
20180117	0.36	-0.154385	0.0289842	-0.0197661	-0.0797551	0.110429	2.12287	-4.94069	-1.42811	0.230353	-0.609596	4.9406		-0.145167
20180118	0.36	-0.1016	-0.0733193	0.00363313	-0.0758198	0.081179	2.1126	-4.94338	-1.39417	0.224571	-0.610626	4.93889		-0.171286
20180119	0.324	0.183951	-0.0822575	0.0277648	-0.0679255	0.0545429	2.09462	-4.94134	-1.35973	0.218759	-0.611652	4.93719		0.129458
20180120	0.398	-0.225965	-0.101546	0.0648901	-0.0564827	0.0310016	2.0689	-4.93457	-1.32479	0.212917	-0.612674	4.93549		-0.262621
20180121	0.485	0.37526	-0.126363	0.106738	-0.0426339	0.0109547	2.03538	-4.92307	-1.28937	0.207046	-0.613694	4.93378		0.355635
20180122	0.485	-0.0734074	-0.0736509	0.128006	-0.0280563	-0.00531551	1.99408	-4.90685	-1.25347	0.201145	-0.61471	4.93208		-0.0190527
20180123	0.44	0.0879934	0.0555463	0.114986	-0.0145019	-0.0175768	1.945	-4.88592	-1.21712	0.195215	-0.615723	4.93038		0.258526
20180124	0.398	-0.302129	0.165001	0.0675541	-0.00341769	-0.0256636	1.88816	-4.86029	-1.18031	0.189255	-0.616732	4.92868		-0.0695743
20180125	0.36	-0.055051	0.206212	0.0018572	0.0043142	-0.0293883	1.8236	-4.82998	-1.14307	0.183266	-0.617738	4.92698		0.153019
20180126	0.36	-0.132097	0.17541	-0.0498299	0.00888413	-0.0285732	1.75138	-4.79502	-1.10541	0.177247	-0.618741	4.92528		-0.00651611
20180127	0.36	-0.0672665	0.0462319	-0.0766322	0.0107336	-0.0231216	1.67158	-4.75544	-1.06733	0.171199	-0.619741	4.92358		-0.0976668
20180128	0.398	0.108815	-0.151658	-0.0799525	0.0102676	-0.0129977	1.5843	-4.71129	-1.02886	0.165121	-0.620737	4.92188		-0.122795
20180129	0.398	-0.156005	-0.222385	-0.0671427	0.00780055	0.00183842	1.48968	-4.66262	-0.990006	0.159015	-0.62173	4.92018		-0.445533
20180130	0.292	0.165147	-0.108271	-0.0425621	0.00318712	0.0214052	1.3879	-4.60947	-0.950785	0.152879	-0.622719	4.91848		0.0143136
20180131	0.264	0.0967912	0.0149005	-0.0142489	-0.00359391	0.0457115	1.27919	-4.55191	-0.91121	0.146713	-0.623705	4.91679		0.0974428
20180201	0.21	-0.449554	0.0675987	0.0135798	-0.0115626	0.074842	1.16382	-4.49001	-0.871296	0.140519	-0.624688	4.91509		-0.368376
20180202	0.236	0.079372	0.123914	0.038446	-0.0191937	0.108813	1.04207	-4.42383	-0.831057	0.134295	-0.625667	4.91339		0.241732
20180203	0.236	-0.185587	0.0830727	0.0509325	-0.0256594	0.147365	0.914262	-4.35346	-0.790507	0.128043	-0.626643	4.9117		-0.051582
20180204	0.36	0.0748582	-0.0566796	0.0463993	-0.0307586	0.190058	0.780766	-4.27898	-0.74966	0.121761	-0.627616	4.91		0.0645778
20180205	0.36	0.193335	-0.09009	0.0318302	-0.0346273	0.236265	0.641968	-4.20048	-0.708531	0.11545	-0.628585	4.90831		0.135075
20180206	0.236	0.0795372	-0.0238182	0.011378	-0.0376197	0.285257	0.498277	-4.11806	-0.667134	0.10911	-0.629551	4.90662		0.067097
20180207	0.21	-0.170283	-0.0306124	-0.003143	-0.0410548	0.336314	0.350125	-4.03181	-0.625484	0.102742	-0.630513	4.90492		-0.204038
20180208	0.186	-0.185472	-0.142179	0.00331765	-0.046109	0.388568	0.197989	-3.94184	-0.583595	0.0963439	-0.631472	4.90323		-0.324333
20180209	0.236	0.249388	-0.201704	0.0318094	-0.0521709	0.440988	0.0423828	-3.84825	-0.541482	0.0899173	-0.632428	4.90154		0.0794929
20180210	0.264	-0.0537864	-0.0678584	0.068204	-0.0580874	0.492484	-0.116153	-3.75117	-0.49916	0.083462	-0.63338	4.89985		-0.0534408
20180211	0.264	-0.419586	0.236883	0.0942009	-0.0625445	0.541865	-0.277041	-3.65069	-0.456642	0.0769778	-0.634329	4.89815		-0.0885016
20180212	1.64	0.773741	0.421781	0.0987194	-0.0639508	0.587927	-0.439683	-3.54694	-0.413945	0.0704648	-0.635274	4.89646		1.29424
20180213	0.324	-0.166718	0.207979	0.0726329	-0.0604277	0.629456	-0.603466	-3.44004	-0.371081	0.0639232	-0.636217	4.89477		0.113894
20180214	0.292	-0.170343	-0.132193	0.00818026	-0.0501119	0.66515	-0.767767	-3.33011	-0.328067	0.0573528	-0.637155	4.89309		-0.294356
20180215	0.292	-0.0909911	-0.244096	-0.0822822	-0.0327014	0.693645	-0.93196	-3.21726	-0.284916	0.0507539	-0.638091	4.8914		-0.417369
20180216	0.236	0.0760799	-0.185259	-0.183229	-0.00799591	0.713545	-1.09542	-3.10163	-0.241644	0.0441263	-0.639022	4.88971		-0.292408
20180217	0.292	-0.0321505	-0.0865342	-0.277154	0.0253183	0.723245	-1.25751	-2.98333	-0.198265	0.0374702	-0.639951	4.88802		-0.395838
20180218	0.324	0.135558	0.0716243	-0.337693	0.0675331	0.721091	-1.41758	-2.86248	-0.154793	0.0307855	-0.640876	4.88633		-0.13051
20180219	0.398	-0.135406	0.224157	-0.337788	0.118401	0.705512	-1.57496	-2.73921	-0.111244	0.0240724	-0.641797	4.88465		-0.249037
20180220	0.398	-0.139207	0.184649	-0.274259	0.178492	0.675004	-1.72897	-2.61364	-0.0676323	0.0173309	-0.642716	4.88296		-0.228817
20180221	0.44	0.218927	-0.0814126	-0.17035	0.247627	0.62792	-1.87889	-2.4859	-0.0239722	0.010561	-0.64363	4.88128		-0.0328354
20180222	0.44	-0.262268	-0.218868	-0.0603706	0.324159	0.562678	-2.02401	-2.3561	0.0197215	0.00376283	-0.644542	4.87959		-0.541506
20180223	0.58	-0.163784	-0.00605462	0.0220814	0.404116	0.478113	-2.16361	-2.22438	0.063434	-0.00306359	-0.645449	4.87791		-0.147757
20180224	1.86	0.595285	0.210962	0.0596423	0.483136	0.37362	-2.29699	-2.09085	0.107151	-0.00991821	-0.646354	4.87623		0.86589
20180225	0.58	0.114645	0.105858	0.0455387	0.558582	0.249162	-2.42345	-1.95564	0.150857	-0.016801	-0.647255	4.87454		0.266042
20180226	0.44	-0.58921	-0.149364	-0.0131726	0.629755	0.10541	-2.54228	-1.81887	0.194538	-0.0237118	-0.648152	4.87286		-0.751746
20180227	0.398	0.408411	-0.216922	-0.0953144	0.697448	-0.0561607	-2.65279	-1.68067	0.23818	-0.0306506	-0.649046	4.87118		0.0961746
20180228	0.398	-0.163593	-0.0572727	-0.16906	0.763753	-0.233523	-2.7543	-1.54116	0.281767	-0.0376174	-0.649937	4.8695		-0.389926
20180301	0.36	0.0633734	0.14922	-0.213552	0.828484	-0.423912	-2.84612	-1.40046	0.325285	-0.0446122	-0.650824	4.86782		-0.000958708
20180302	0.36	-0.0368665	0.199279	-0.226293	0.889511	-0.623816	-2.92761	-1.2587	0.36872	-0.0516347	-0.651708	4.86614		-0.063881
20180303	0.36	-0.268748	0.106106	-0.219292	0.943606	-0.828988	-2.99818	-1.11601	0.412056	-0.0586851	-0.652588	4.86446		-0.381934
20180304	0.44	0.0860846	0.0297064	-0.190592	0.985172	-1.0348	-3.05725	-0.972507	0.455278	-0.0657632	-0.653465	4.86278		-0.0748013
20180305	0.44	0.0202008	-0.0209192	-0.142534	1.00471	-1.23643	-3.10425	-0.828315	0.498374	-0.0728689	-0.654338	4.8611		-0.143253
20180306	0.36	-0.0331563	-0.00143199	-0.0695515	0.993065	-1.42888	-3.13862	-0.68356	0.541326	-0.0800023	-0.655207	4.85942		-0.10414
20180307	0.4455	-0.00704309	0.129189	0.038014	0.939901	-1.60683	-3.15986	-0.538368	0.584122	-0.0871633	-0.656074	4.85774		0.16016
20180308	0.531	0.141161	0.126611	0.191255	0.835186	-1.76504	-3.16751	-0.392871	0.626746	-0.0943518	-0.656937	4.85607		0.459027
20180309	0.485	0.0116692	-0.0981305	0.389382	0.669725	-1.89856	-3.16121	-0.247202	0.669183	-0.101568	-0.657796	4.85439		0.302921
20180310	0.58	-0.0557634	-0.286924	0.606382	0.430384	-2.00257	-3.14068	-0.101498	0.711419	-0.108811	-0.658652	4.85272		0.263695
20180311	0.531	0.16735	-0.259264	0.81682	0.103929	-2.07299	-3.10576	0.044106	0.75344	-0.116082	-0.659504	4.85104		0.724906
20180312	0.44	0.0561624	-0.0345376	0.984238	-0.319565	-2.10699	-3.05643	0.189474	0.79523	-0.12338	-0.660353	4.84937		1.00586
20180313	0.36	-0.412017	0.313835	1.10039	-0.841856	-2.10333	-2.99279	0.334472	0.836774	-0.130705	-0.661198	4.84769		1.00221
20180314	0.868	0.299492	0.640863	1.19431	-1.45286	-2.06217	-2.9151	0.478965	0.87806	-0.138057	-0.66204	4.84602		2.13467
20180315	0.685	-0.276865	0.769745	1.29325	-2.12374	-1.98516	-2.82374	0.622819	0.91907	-0.145436	-0.662878	4.84435		1.78613
20180316	0.531	0.126532	0.621471	1.39623	-2.8084	-1.87514	-2.71919	0.7659	0.959792	-0.152843	-0.663713	4.84268		2.14424
20180317	0.631	0.365932	0.484334	1.49683	-3.44823	-1.73583	-2.602	0.908073	1.00021	-0.160276	-0.664544	4.841		2.34709
20180318	0.58	-0.338243	0.846381	1.5676	-3.97643	-1.57166	-2.47275	1.0492	1.04031	-0.167737	-0.665372	4.83933		2.07574
20180319	0.868	-0.63016	1.87672	1.50902	-4.32202	-1.38727	-2.33204	1.18916	1.08007	-0.175224	-0.666196	4.83766		2.75558
20180320	3.61	0.921255	2.98539	1.12217	-4.4167	-1.18743	-2.18056	1.32781	1.11949	-0.182738	-0.667017	4.83599		5.02882
20180321	2.72	-0.295504	3.40862	0.182155	-4.20778	-0.976991	-2.01897	1.46501	1.15855	-0.190279	-0.667834	4.83432		3.29528
20180322	2.12	0.335832	3.08665	-1.41486	-3.67641	-0.760505	-1.84798	1.60063	1.19723	-0.197847	-0.668647	4.83266		2.00763
20180323	0.741	-0.123117	2.45539	-3.50991	-2.84162	-0.542313	-1.6683	1.73454	1.23551	-0.205441	-0.669457	4.83099		-1.17764
20180324	0.799	1.14279	1.69422	-5.62789	-1.74274	-0.326628	-1.48066	1.86661	1.27339	-0.213062	-0.670264	4.82932		-2.79088
20180325	0.995	2.48529	0.144046	-7.07796	-0.42892	-0.11743	-1.2858	1.9967	1.31085	-0.220709	-0.671067	4.82765		-4.44862
20180326	0.995	3.55958	-3.09778	-7.24742	1.04026	0.0813542	-1.08446	2.12467	1.34788	-0.228383	-0.671866	4.82599		-6.78563
20180327	0.93	4.96468	-7.61358	-5.85115	2.58831	0.265793	-0.877402	2.2504	1.38445	-0.236083	-0.672662	4.82432		-8.50005
20180328	0.799	2.76085	-10.762	-2.95669	4.11802	0.431969	-0.665423	2.37375	1.42056	-0.24381	-0.673454	4.82266		-10.9578
20180329	0.868	-4.08269	-9.40576	0.988826	5.51708	0.575987	-0.449337	2.49458	1.45618	-0.251563	-0.674243	4.82099		-12.4996
20180330	0.799	-17.2559	-2.50356	5.24012	6.6695	0.693993	-0.229993	2.61277	1.49132	-0.259342	-0.675028	4.81933		-14.5193
20180331	6.58	-25.6739	6.89414	8.92446	7.45896	0.782318	-0.00827718	2.72818	1.52594	-0.267148	-0.675809	4.81766		-9.85526
20180401	31.2	-11.0134	14.4019	11.1498	7.76927	0.837815	0.214875	2.84067	1.56004	-0.274979	-0.676587	4.816		14.5383
20180402	73.7	30.1973	15.2262	11.1294	7.50746	0.859029	0.438483	2.95012	1.5936	-0.282837	-0.677362	4.81434		56.553
20180403	3.41	-29.2607	6.85284	8.71809	6.68309	0.848636	0.661543	3.05639	1.62661	-0.29072	-0.678133	4.81268		-13.6898
20180404	1.2	-16.2672	-3.29707	4.72327	5.39308	0.812135	0.883051	3.15934	1.65905	-0.29863	-0.6789	4.81102		-14.841
20180405	5.16	1.26364	-10.4599	0.160849	3.75282	0.755607	1.102	3.25884	1.69091	-0.306565	-0.679663	4.80935		-9.03543
20180406	12	15.3532	-12.0884	-3.9914	1.87822	0.685213	1.31736	3.35476	1.72217	-0.314527	-0.680424	4.80769		-0.726599
20180407	5.57	8.57904	-7.48033	-6.97706	-0.11483	0.607131	1.52811	3.44697	1.75282	-0.322514	-0.68118	4.80604		-5.87836
20180408	3.61	4.69775	-2.01742	-8.4356	-2.11018	0.527563	1.73327	3.53532	1.78284	-0.330527	-0.681933	4.80438		-5.75527
20180409	2.99	2.95466	0.718605	-8.28905	-3.99215	0.452738	1.93182	3.6197	1.81222	-0.338565	-0.682682	4.80272		-4.61579
20180410	2.49	2.64737	0.653439	-6.85806	-5.65219	0.388876	2.12282	3.69996	1.84094	-0.34663	-0.683428	4.80106		-3.55725
20180411	1.2	1.86158	-0.566089	-4.90705	-6.98642	0.342183	2.30534	3.77597	1.869	-0.354719	-0.68417	4.7994		-3.61156
20180412	1.64	1.04882	-0.303193	-3.35097	-7.89727	0.318846	2.4785	3.84759	1.89637	-0.362835	-0.684908	4.79775		-2.60534
20180413	1.42	-3.96522	3.78129	-2.79213	-8.30586	0.324604	2.64153	3.9147	1.92304	-0.370975	-0.685643	4.79609		-2.97605
20180414	16.2	4.58204	9.96334	-2.99357	-8.18746	0.362749	2.79376	3.97717	1.94899	-0.379141	-0.686374	4.79443		11.5518
20180415	12	-1.40728	11.6162	-3.48924	-7.59825	0.432893	2.93458	4.03485	1.97422	-0.387333	-0.687102	4.79278		6.71971
20180416	5.57	-3.42835	6.18693	-3.85839	-6.63493	0.532219	3.06353	4.08762	1.9987	-0.395549	-0.687826	4.79113		-1.09981
20180417	3.61	3.75966	-4.69974	-3.78313	-5.40111	0.657086	3.18023	4.13536	2.02242	-0.403791	-0.688546	4.78947		-4.72321
20180418	2.72	10.7293	-14.9502	-2.97012	-4.00141	0.803705	3.28434	4.17793	2.04537	-0.412058	-0.689262	4.78782		-7.19107
20180419	2.39	9.71912	-17.6315	-1.18754	-2.53082	0.968148	3.37558	4.21523	2.06753	-0.42035	-0.689975	4.78617		-9.09989
20180420	2.18	-4.0708	-9.02747	1.46212	-1.05588	1.14637	3.45368	4.24712	2.08889	-0.428666	-0.690685	4.78451		-11.6362
20180421	2	-25.239	7.70831	4.36107	0.375132	1.33429	3.51841	4.27351	2.10944	-0.437008	-0.69139	4.78286		-13.1697
20180422	70.6	25.2505	21.7677	6.76596	1.71667	1.52776	3.56959	4.2943	2.12917	-0.445374	-0.692093	4.78121		53.7842
20180423	25	-22.0718	20.6258	8.03406	2.9227	1.72264	3.60702	4.30943	2.14806	-0.453764	-0.692791	4.77956		6.58797
20180424	25	-14.2719	11.1291	8.00382	3.94902	1.91468	3.63055	4.31884	2.1661	-0.462179	-0.693486	4.77791		4.86102
20180425	40.6	11.099	1.63008	6.88913	4.76356	2.09935	3.64001	4.32252	2.18329	-0.470618	-0.694177	4.77626		19.6182
20180426	20.4	-3.1239	-2.73732	4.9828	5.35226	2.27188	3.63526	4.32046	2.19963	-0.47908	-0.694864	4.77461		-0.878426
20180427	15.35	-1.94713	-6.75911	2.66897	5.71331	2.42751	3.61614	4.3127	2.21512	-0.487567	-0.695548	4.77296		-6.03727
20180428	10.3	-0.595198	-11.4628	0.338128	5.85264	2.56154	3.58253	4.29929	2.22974	-0.496077	-0.696228	4.77132		-11.7199
20180429	5.26	0.227631	-15.5334	-1.68491	5.78582	2.6696	3.53432	4.2803	2.24351	-0.50461	-0.696904	4.76967		-16.9906
20180430	4.32	3.7388	-18.1534	-3.06091	5.53497	2.74849	3.4715	4.25583	2.25642	-0.513166	-0.697577	4.76802		-17.4755
20180501	7.7	8.59999	-18.8268	-3.40152	5.1269	2.79607	3.39419	4.22599	2.26849	-0.521745	-0.698246	4.76638		-13.6283
20180502	4.61	3.67026	-17.4257	-2.47846	4.59393	2.81081	3.30266	4.19091	2.2797	-0.530347	-0.698911	4.76473		-16.2339
20180503	3.55	-3.71512	-12.1168	-0.600073	3.96275	2.79177	3.19736	4.15075	2.29007	-0.538971	-0.699573	4.76309		-16.432
20180504	1.46	-19.5171	0.186464	1.71206	3.25667	2.73903	3.07885	4.10565	2.2996	-0.547616	-0.700231	4.76144		-17.6186
20180505	56.1	20.9909	13.7055	3.82681	2.49667	2.65419	2.94779	4.05578	2.3083	-0.556283	-0.700885	4.7598		38.5232
20180506	41.2	1.55361	17.8384	5.09702	1.70318	2.53935	2.80495	4.00129	2.31618	-0.564972	-0.701536	4.75816		24.489
20180507	18.1	-16.5719	13.874	5.06446	0.898572	2.39672	2.65118	3.94234	2.32324	-0.573681	-0.702183	4.75651		2.36663
20180508	9.46	-14.7374	6.11558	3.91963	0.109365	2.22866	2.48737	3.87908	2.3295	-0.58241	-0.702826	4.75487		-4.70215
20180509	3.55	-10.6418	-0.955344	2.01846	-0.63283	2.03759	2.31441	3.81168	2.33496	-0.59116	-0.703465	4.75323		-9.57867
20180510	4.32	-2.19282	-5.48283	-0.259883	-1.29718	1.82605	2.13321	3.74028	2.33963	-0.59993	-0.704101	4.75159		-7.93554
20180511	4.32	2.44354	-7.11158	-2.44476	-1.8553	1.59657	1.9447	3.66506	2.34352	-0.608718	-0.704733	4.74995		-7.11281
20180512	4.32	5.10029	-6.85801	-3.99787	-2.2815	1.35166	1.74982	3.58616	2.34663	-0.617526	-0.705361	4.74831		-5.75558
20180513	3.55	5.05035	-6.35276	-4.48169	-2.55497	1.09367	1.54951	3.50374	2.34898	-0.626352	-0.705986	4.74667		-5.7841
20180514	1.97	3.27239	-5.78219	-3.85475	-2.67068	0.825135	1.34471	3.41796	2.35056	-0.635195	-0.706606	4.74503		-6.36455
20180515	1.16	-0.269574	-4.07073	-2.46347	-2.64645	0.549143	1.13635	3.32897	2.3514	-0.644057	-0.707223	4.7434		-6.80377
20180516	0.533	-6.09421	-0.273421	-0.764156	-2.50751	0.269251	0.925373	3.23694	2.3515	-0.652936	-0.707837	4.74176		-7.13179
20180517	11.1665	-1.74703	4.35103	0.823868	-2.27854	-0.0105979	0.712705	3.14201	2.35087	-0.661831	-0.708446	4.74012		3.42787
20180518	21.8	6.39821	6.3518	1.90341	-1.98436	-0.286159	0.499277	3.04435	2.34951	-0.670742	-0.709052	4.73849		14.6534
20180519	8.12	-4.20969	3.27788	2.18929	-1.64956	-0.553299	0.28601	2.94412	2.34743	-0.679669	-0.709654	4.73685		1.25749
20180520	3.55	-3.38592	-1.50549	1.84709	-1.2947	-0.808123	0.0738225	2.84147	2.34464	-0.688612	-0.710252	4.73521		-3.04433
20180521	2.62	-1.31318	-3.45132	1.1669	-0.935485	-1.04712	-0.136374	2.73655	2.34116	-0.697569	-0.710847	4.73358		-3.59761
20180522	2.28	-3.08218	-1.2325	0.389412	-0.58683	-1.26729	-0.343676	2.62952	2.33698	-0.70654	-0.711438	4.73195		-3.92526
20180523	11.4	3.95256	1.59406	-0.312418	-0.267192	-1.46618	-0.547192	2.52055	2.33212	-0.715525	-0.712025	4.73031		5.23421
20180524	5.26	-1.36574	1.87975	-0.786376	0.00268854	-1.64202	-0.746039	2.40979	2.32659	-0.724524	-0.712608	4.72868		-0.272359
20180525	3.55	-1.70693	0.668293	-0.990054	0.210145	-1.79409	-0.939335	2.29739	2.32038	-0.733535	-0.713188	4.72705		-2.02869
20180526	3.14	-0.728749	-0.118162	-1.00672	0.353022	-1.92241	-1.1262	2.18351	2.31352	-0.742559	-0.713763	4.72542		-1.85363
20180527	4.32	0.651268	-0.230648	-0.924549	0.437073	-2.02778	-1.30576	2.06831	2.30601	-0.751595	-0.714335	4.72379		-0.50393
20180528	4.32	0.808538	-0.232496	-0.770652	0.467364	-2.11194	-1.47717	1.95194	2.29785	-0.760642	-0.714903	4.72216		-0.19461
20180529	2.9	-0.394846	-0.345219	-0.550008	0.450513	-2.17747	-1.6396	1.83457	2.28906	-0.7697	-0.715468	4.72053		-1.29007
20180530	2.49	-0.459791	-0.250071	-0.282519	0.394762	-2.22721	-1.79226	1.71635	2.27964	-0.778768	-0.716028	4.7189		-0.992381
20180531	3.78	0.296857	0.0632416	-0.00968121	0.309185	-2.26394	-1.93444	1.59744	2.26961	-0.787847	-0.716585	4.71727		0.350417
20180601	3.33	0.185105	0.202669	0.206446	0.205874	-2.29051	-2.06545	1.47798	2.25896	-0.796935	-0.717138	4.71564		0.594221
20180602	2.75	0.0749649	0.0523881	0.309702	0.0971311	-2.30968	-2.18467	1.35815	2.24772	-0.806033	-0.717687	4.71401		0.437055
20180603	2.28	0.372067	-0.174865	0.288686	-0.00551424	-2.32374	-2.29158	1.2381	2.23588	-0.815139	-0.718233	4.71238		0.485888
20180604	0.937	-0.663719	-0.231602	0.167498	-0.0918282	-2.33442	-2.38573	1.11797	2.22345	-0.824253	-0.718774	4.71076		-0.727823
20180605	1.01	-0.0321278	-0.0473259	-0.00658905	-0.153639	-2.34299	-2.46684	0.997929	2.21045	-0.833374	-0.719312	4.70913		-0.0860427
20180606	1.57	0.464303	0.158118	-0.184268	-0.184345	-2.3502	-2.53475	0.878118	2.19688	-0.842503	-0.719846	4.70751		0.438152
20180607	0.533	-0.103986	0.138851	-0.329919	-0.179717	-2.35623	-2.58942	0.758683	2.18275	-0.851639	-0.720376	4.70588		-0.295054
20180608	0.37	-0.258467	-0.0257017	-0.409035	-0.138543	-2.36055	-2.63095	0.639761	2.16807	-0.86078	-0.720902	4.70426		-0.693203
20180609	0.533	0.273626	-0.161149	-0.400925	-0.0621214	-2.36199	-2.65955	0.521483	2.15284	-0.869928	-0.721425	4.70263		-0.288448
20180610	0.325	0.0362031	-0.240198	-0.300431	0.0445043	-2.35877	-2.67552	0.403968	2.13708	-0.879081	-0.721943	4.70101		-0.504427
20180611	0.247	-0.319247	-0.132602	-0.118346	0.171175	-2.34863	-2.67922	0.287334	2.12079	-0.888238	-0.722458	4.69939		-0.570195
20180612	1.46	0.474914	0.1632	0.0901006	0.304785	-2.329	-2.67113	0.171694	2.10398	-0.8974	-0.722969	4.69777		0.728215
20180613	0.937	-0.357524	0.471615	0.257801	0.430577	-2.29729	-2.65179	0.0571579	2.08666	-0.906566	-0.723476	4.69614		0.371891
20180614	2.05	0.839816	0.430533	0.319762	0.532753	-2.25081	-2.62183	-0.056164	2.06883	-0.915735	-0.72398	4.69452		1.59011
20180615	0.284	-0.707862	0.0130893	0.256168	0.596546	-2.18695	-2.58195	-0.168164	2.05051	-0.924907	-0.724479	4.6929		-0.438605
20180616	0.596	0.477804	-0.345717	0.123852	0.610288	-2.10344	-2.53293	-0.278736	2.03171	-0.934081	-0.724975	4.69128		0.255939
20180617	0.215	-0.163699	-0.41699	0.00195457	0.564403	-1.99841	-2.47557	-0.387775	2.01243	-0.943257	-0.725466	4.68966		-0.578734
20180618	0.247	0.121263	-0.352128	-0.0256313	0.451415	-1.87045	-2.41065	-0.495181	1.99268	-0.952435	-0.725954	4.68805		-0.256496
20180619	0.474	0.176222	-0.21372	0.0957757	0.269295	-1.71916	-2.33898	-0.600854	1.97246	-0.961613	-0.726438	4.68643		0.058278
20180620	0.37	-0.856679	0.0591882	0.352147	0.0253225	-1.54488	-2.26132	-0.704696	1.95179	-0.970792	-0.726918	4.68481		-0.445344
20180621	2.08	0.821669	0.264782	0.67944	-0.266275	-1.34849	-2.17841	-0.806612	1.93068	-0.979971	-0.727395	4.68319		1.76589
20180622	1.38	0.128066	0.19398	0.993283	-0.586566	-1.13128	-2.09099	-0.906508	1.90913	-0.98915	-0.727867	4.68158		1.31533
20180623	1.01	-0.327071	0.0131721	1.21534	-0.910707	-0.894971	-1.99972	-1.00429	1.88716	-0.998328	-0.728336	4.67996		0.901441
20180624	1.38	-0.003723	0.0573091	1.28933	-1.20629	-0.641695	-1.90528	-1.09987	1.86476	-1.0075	-0.7288	4.67835		1.34292
20180625	0.863	-0.427952	0.268175	1.16596	-1.44143	-0.373919	-1.80829	-1.19316	1.84195	-1.01668	-0.729261	4.67673		1.00619
20180626	1.97	1.08763	0.279232	0.795749	-1.58735	-0.0945336	-1.70935	-1.28407	1.81873	-1.02585	-0.729718	4.67512		2.16261
20180627	0.1	-0.53633	0.15479	0.160635	-1.62089	0.192907	-1.60902	-1.37251	1.79512	-1.03502	-0.730171	4.6735		-0.220906
20180628	0.215	-0.0700283	0.276031	-0.707552	-1.52934	0.484157	-1.50789	-1.4584	1.77113	-1.04419	-0.73062	4.67189		-0.50155
20180629	0.284	0.352469	0.601041	-1.69312	-1.31062	0.774427	-1.40651	-1.54167	1.74675	-1.05335	-0.731065	4.67028		-0.739611
20180630	0.214	0.10731	0.855284	-2.60059	-0.969944	1.05821	-1.30545	-1.62222	1.722	-1.06251	-0.731506	4.66867		-1.63799
20180701	0.187	-0.425199	0.827654	-3.17907	-0.52062	1.32953	-1.20528	-1.69997	1.69689	-1.07166	-0.731944	4.66706		-2.77661
20180702	1.78	1.11383	0.186033	-3.143	0.0110709	1.58232	-1.10655	-1.77486	1.67142	-1.08081	-0.732377	4.66545		-1.84314
20180703	1.64	1.42487	-1.45969	-2.29713	0.585585	1.81046	-1.00984	-1.84681	1.64561	-1.08995	-0.732807	4.66384		-2.33195
20180704	1.38	1.03502	-3.58152	-0.704614	1.15175	2.00785	-0.915686	-1.91574	1.61946	-1.09909	-0.733232	4.66223		-3.25112
20180705	2.75	-0.675205	-3.26009	1.2647	1.65377	2.16837	-0.824653	-1.98158	1.59298	-1.10822	-0.733654	4.66062		-2.6706
20180706	2.75	-8.03239	1.47739	3.07864	2.03516	2.28597	-0.737281	-2.04426	1.56618	-1.11734	-0.734072	4.65901		-3.47636
20180707	25.3	8.999	5.76225	4.08492	2.23969	2.35489	-0.654071	-2.10372	1.53907	-1.12645	-0.734485	4.6574		18.8462
20180708	5.26	-8.52702	3.68337	3.79865	2.22504	2.37101	-0.575469	-2.1599	1.51165	-1.13556	-0.734895	4.65579		-1.04501
20180709	2.75	-5.17369	-0.884716	2.52427	2.00324	2.33481	-0.501751	-2.21275	1.48393	-1.14466	-0.735301	4.65419		-3.53414
20180710	2.11	-0.305688	-3.6884	0.79595	1.61844	2.25038	-0.432998	-2.26223	1.45593	-1.15375	-0.735703	4.65258		-3.19813
20180711	2	2.06084	-3.71442	-0.879841	1.11981	2.1232	-0.36916	-2.3083	1.42764	-1.16283	-0.736101	4.65098		-2.53343
20180712	1.85	1.78335	-2.03922	-2.09003	0.55622	1.95918	-0.310147	-2.35096	1.39909	-1.1719	-0.736496	4.64937		-2.3459
20180713	0.37	0.212987	-0.154285	-2.64329	-0.024297	1.76426	-0.255854	-2.39018	1.37027	-1.18096	-0.736886	4.64777		-2.58459
20180714	0.284	-0.366947	0.911412	-2.55189	-0.575661	1.54437	-0.206151	-2.42598	1.3412	-1.19001	-0.737272	4.64616		-2.00743
20180715	1.38	0.314428	1.11747	-1.99675	-1.05603	1.30544	-0.160899	-2.45834	1.31187	-1.19905	-0.737654	4.64456		-0.564857
20180716	0.215	-0.328071	0.810898	-1.24261	-1.43034	1.0534	-0.119953	-2.4873	1.28231	-1.20808	-0.738033	4.64296		-0.759788
20180717	0.187	-0.0801184	0.426118	-0.537093	-1.67397	0.794102	-0.0831565	-2.51286	1.25252	-1.21709	-0.738407	4.64135		-0.191093
20180718	0.163	0.0999029	0.187562	-0.0182758	-1.77757	0.53307	-0.0503504	-2.53505	1.22251	-1.22609	-0.738777	4.63975		0.269189
20180719	0.119	0.162816	0.0742994	0.286289	-1.75162	0.275477	-0.0213715	-2.55391	1.19228	-1.23508	-0.739144	4.63815		0.523405
20180720	0.14	-0.102271	0.0246725	0.432569	-1.61922	0.0260905	0.00394929	-2.56945	1.16185	-1.24406	-0.739506	4.63655		0.35497
20180721	0.119	-0.280261	0.0645391	0.48775	-1.40831	-0.210761	0.025784	-2.58172	1.13122	-1.25302	-0.739865	4.63495		0.272029
20180722	0.1	0.104674	0.128351	0.495275	-1.14753	-0.431132	0.0443016	-2.59077	1.1004	-1.26197	-0.740219	4.63335		0.728299
20180723	0.119	0.012266	0.072433	0.465606	-0.860277	-0.631675	0.0596783	-2.59663	1.06939	-1.2709	-0.74057	4.63175		0.550305
20180724	0.119	0.0723446	-0.0992624	0.404955	-0.566788	-0.809853	0.0720916	-2.59936	1.03822	-1.27982	-0.740916	4.63015		0.378037
20180725	0.1	0.04184	-0.223608	0.32984	-0.282868	-0.963953	0.0817102	-2.59899	1.00688	-1.28872	-0.741259	4.62856		0.148073
20180726	0.084	-0.114255	-0.12206	0.262385	-0.0183675	-1.09294	0.0887028	-2.5956	0.975382	-1.2976	-0.741597	4.62696		0.02607
20180727	0.084	-0.542403	0.176359	0.201535	0.221323	-1.19638	0.0932462	-2.58923	0.943737	-1.30647	-0.741931	4.62536		-0.164509
20180728	1.46	0.87366	0.336863	0.140929	0.431804	-1.2742	0.0955294	-2.57995	0.911953	-1.31532	-0.742262	4.62377		1.35145
20180729	0.119	-0.608138	0.112947	0.0766008	0.608512	-1.32657	0.0957503	-2.56781	0.880038	-1.32415	-0.742588	4.62217		-0.41859
20180730	0.1	0.0145657	-0.164421	0.0164035	0.748209	-1.35379	0.0940954	-2.55287	0.848001	-1.33297	-0.742911	4.62058		-0.133452
20180731	0.37	0.300375	-0.187646	-0.0287414	0.848703	-1.35653	0.0907503	-2.5352	0.815849	-1.34177	-0.743229	4.61898		0.0839876
20180801	0.187	-0.227073	-0.0782577	-0.0481237	0.907727	-1.33592	0.0859145	-2.51487	0.783592	-1.35054	-0.743544	4.61739		-0.353454
20180802	0.533	0.118097	-0.0646607	-0.0330685	0.920922	-1.29336	0.0798037	-2.49195	0.751238	-1.3593	-0.743854	4.6158		0.0203682
20180803	0.124	-0.0471014	-0.138397	0.0173286	0.88554	-1.23011	0.0726291	-2.46651	0.718795	-1.36804	-0.744161	4.6142		-0.168169
20180804	0.214	-0.253871	-0.0377112	0.0880402	0.800924	-1.14742	0.0645614	-2.43863	0.686273	-1.37676	-0.744463	4.61261		-0.203542
20180805	0.215	-0.115652	0.191558	0.158376	0.668173	-1.04677	0.0557688	-2.40839	0.65368	-1.38546	-0.744761	4.61102		0.234281
20180806	1.46	0.675032	0.278476	0.206089	0.491228	-0.929848	0.0464288	-2.37587	0.621024	-1.39413	-0.745056	4.60943		1.1596
20180807	0.214	-0.259565	0.0962025	0.229583	0.277074	-0.798673	0.0367036	-2.34117	0.588315	-1.40279	-0.745346	4.60784		0.0662204
20180808	0.214	-0.164813	-0.17582	0.265115	0.0353394	-0.655485	0.026745	-2.30436	0.555561	-1.41142	-0.745632	4.60625		-0.0755177
20180809	0.163	-0.0219808	-0.267504	0.334886	-0.221465	-0.502704	0.0167188	-2.26556	0.522771	-1.42003	-0.745914	4.60466		0.0454011
20180810	0.119	0.00282686	-0.163843	0.418214	-0.474903	-0.3429	0.00679141	-2.22485	0.489954	-1.42862	-0.746192	4.60307		0.257198
20180811	0.214	0.368953	0.00551774	0.459277	-0.701512	-0.178725	-0.00287728	-2.18234	0.45712	-1.43718	-0.746466	4.60148		0.833747
20180812	0.214	-0.0501415	0.0799438	0.391755	-0.877089	-0.0129124	-0.0121214	-2.13814	0.424276	-1.44572	-0.746736	4.5999		0.421558
20180813	0.14	0.0297832	0.156669	0.156	-0.980337	0.151838	-0.0207627	-2.09236	0.391433	-1.45424	-0.747002	4.59831		0.342452
20180814	0.1	-0.26238	0.340155	-0.259044	-0.995984	0.312749	-0.0285921	-2.0451	0.358599	-1.46273	-0.747264	4.59672		-0.181269
20180815	0.187	0.0780361	0.560149	-0.793464	-0.916298	0.467023	-0.0353864	-1.99647	0.325784	-1.47119	-0.747522	4.59514		-0.155279
20180816	0.1	0.104835	0.616263	-1.32745	-0.740511	0.611686	-0.0409296	-1.9466	0.292997	-1.47963	-0.747775	4.59355		-0.606355
20180817	0.084	0.23854	0.363768	-1.68277	-0.478454	0.743484	-0.0450174	-1.8956	0.260246	-1.48805	-0.748025	4.59197		-1.08046
20180818	0.069	0.64729	-0.341566	-1.67589	-0.148828	0.859103	-0.04747	-1.84358	0.227543	-1.49643	-0.74827	4.59038		-1.37016
20180819	0.069	0.760379	-1.49565	-1.19379	0.219545	0.955235	-0.0481384	-1.79066	0.194895	-1.50479	-0.748512	4.5888		-1.92906
20180820	0.057	0.442877	-2.43281	-0.303464	0.589344	1.02865	-0.046893	-1.73694	0.162312	-1.51313	-0.748749	4.58722		-2.2934
20180821	0.069	-2.36705	-1.59578	0.775105	0.921086	1.0762	-0.0436252	-1.68254	0.129804	-1.52143	-0.748983	4.58564		-3.18772
20180822	0.937	-4.91274	1.34317	1.7079	1.17513	1.09485	-0.0382608	-1.62756	0.0973806	-1.52971	-0.749212	4.58405		-1.86167
20180823	14	5.49733	3.47342	2.12885	1.31275	1.08208	-0.0307961	-1.57211	0.0650502	-1.53795	-0.749437	4.58247		11.0996
20180824	2.05	-4.78988	1.60303	1.80046	1.30803	1.03695	-0.0212859	-1.51627	0.0328222	-1.54617	-0.749658	4.58089		-1.38639
20180825	1.97	-0.509664	-1.34163	0.95972	1.17496	0.960855	-0.00980027	-1.46014	0.000705989	-1.55436	-0.749875	4.57931		-0.891578
20180826	1.23	0.949432	-2.3256	-0.0271871	0.946622	0.856682	0.00357054	-1.40381	-0.0312893	-1.56252	-0.750087	4.57773		-1.40335
20180827	0.215	0.819635	-1.61345	-0.823203	0.65867	0.727957	0.0187351	-1.34736	-0.0631543	-1.57065	-0.750296	4.57615		-1.61702
20180828	0.37	0.304021	-0.522609	-1.21074	0.347242	0.578461	0.0355809	-1.29088	-0.0948798	-1.57875	-0.7505	4.57458		-1.42932
20180829	0.215	-0.531248	0.365489	-1.18766	0.0473793	0.412151	0.0539807	-1.23443	-0.126456	-1.58681	-0.750701	4.573		-1.35342
20180830	1.57	1.01982	0.829197	-0.892301	-0.211192	0.233091	0.0738007	-1.17808	-0.157874	-1.59485	-0.750897	4.57142		0.956718
20180831	0.284	-0.481772	0.685987	-0.499837	-0.407397	0.0455725	0.0949043	-1.1219	-0.189125	-1.60285	-0.751089	4.56984		-0.295622
20180901	0.247	-0.113946	0.278527	-0.160408	-0.528908	-0.145632	0.117152	-1.06595	-0.220199	-1.61082	-0.751277	4.56827		0.00417264
20180902	0.163	-0.128291	0.020012	0.0419681	-0.574933	-0.335338	0.140401	-1.01029	-0.251087	-1.61875	-0.751461	4.56669		-0.066311
20180903	0.119	0.154767	-0.120207	0.113671	-0.556595	-0.517947	0.1645	-0.954964	-0.281781	-1.62666	-0.751641	4.56512		0.148231
20180904	0.069	-0.308199	-0.0968303	0.116767	-0.496121	-0.687468	0.189301	-0.900026	-0.312272	-1.63453	-0.751816	4.56354		-0.288262
20180905	0.069	0.234879	0.0532048	0.106632	-0.421869	-0.837706	0.214648	-0.845518	-0.34255	-1.64236	-0.751988	4.56197		0.394717
20180906	0.284	0.0334976	0.136163	0.126503	-0.361542	-0.962587	0.240384	-0.791483	-0.372609	-1.65016	-0.752155	4.5604		0.296164
20180907	0.1	0.15278	0.043737	0.201178	-0.338211	-1.05679	0.266353	-0.737961	-0.402438	-1.65792	-0.752318	4.55882		0.397695
20180908	0.1	-0.063668	-0.0924977	0.331507	-0.366545	-1.11644	0.292412	-0.684991	-0.43203	-1.66565	-0.752477	4.55725		0.175341
20180909	0.084	-0.0506245	-0.0976004	0.492246	-0.451298	-1.13938	0.318424	-0.632607	-0.461376	-1.67334	-0.752632	4.55568		0.344021
20180910	0.119	0.134954	-0.0162667	0.642071	-0.588647	-1.12506	0.344239	-0.580843	-0.49047	-1.681	-0.752783	4.55411		0.760758
20180911	0.163	-0.0489224	-0.00105941	0.744993	-0.767213	-1.07441	0.369693	-0.52973	-0.519302	-1.68861	-0.752929	4.55254		0.695011
20180912	0.119	-0.183983	-0.069158	0.777252	-0.969057	-0.989596	0.394608	-0.479298	-0.547865	-1.69619	-0.753071	4.55097		0.524111
20180913	0.163	0.0522054	-0.161168	0.721654	-1.17059	-0.873739	0.418806	-0.429576	-0.576152	-1.70373	-0.75321	4.5494		0.612691
20180914	0.119	0.0552087	-0.118177	0.555053	-1.34192	-0.730713	0.442118	-0.380593	-0.604155	-1.71123	-0.753343	4.54783		0.492085
20180915	0.119	-0.00149598	0.1354	0.246529	-1.45287	-0.564857	0.46437	-0.332374	-0.631867	-1.7187	-0.753473	4.54626		0.380433
20180916	0.1	0.00673132	0.497814	-0.236698	-1.47425	-0.380938	0.485388	-0.284941	-0.659282	-1.72612	-0.753599	4.54469		0.267847
20180917	0.1	-0.0157028	0.841913	-0.887812	-1.38261	-0.184127	0.505	-0.238319	-0.686393	-1.7335	-0.75372	4.54313		-0.0616021
20180918	0.1	-0.193975	1.05777	-1.60702	-1.16647	0.0201273	0.523035	-0.192526	-0.713192	-1.74084	-0.753837	4.54156		-0.743223
20180919	0.119	0.283622	0.979508	-2.20608	-0.829609	0.226296	0.539322	-0.14758	-0.739675	-1.74814	-0.75395	4.53999		-0.942954
20180920	0.1	0.641084	0.308976	-2.44092	-0.388803	0.428867	0.553695	-0.103496	-0.765834	-1.7554	-0.754059	4.53843		-1.49086
20180921	0.214	1.26954	-1.15266	-2.10217	0.124506	0.622318	0.565987	-0.0602895	-0.791665	-1.76262	-0.754164	4.53686		-1.98529
20180922	0.284	1.3466	-3.02351	-1.11511	0.666838	0.801126	0.576033	-0.0179706	-0.817162	-1.76979	-0.754264	4.5353		-2.79203
20180923	1.09	0.0510507	-3.13651	0.354644	1.18606	0.959764	0.583667	0.0234514	-0.842321	-1.77692	-0.75436	4.53374		-2.73082
20180924	0.214	-6.63018	0.411133	1.92109	1.62798	1.09271	0.58872	0.0639709	-0.867138	-1.784	-0.754452	4.53217		-4.29796
20180925	20	7.21049	4.58245	3.0314	1.93834	1.19447	0.591025	0.103585	-0.891609	-1.79104	-0.75454	4.53061		14.8243
20180926	9	-3.62821	4.07845	3.21322	2.0689	1.25995	0.59045	0.142293	-0.915732	-1.79804	-0.754623	4.52905		3.66347
20180927	3.14	-5.207	0.738769	2.49915	2.00398	1.28599	0.586933	0.180098	-0.939503	-1.80499	-0.754703	4.52749		-1.96908
20180928	2.05	-1.90492	-1.97786	1.2364	1.77139	1.27322	0.580492	0.217005	-0.962921	-1.81189	-0.754778	4.52593		-2.64639
20180929	2	0.179346	-2.53871	-0.177025	1.41167	1.22476	0.571256	0.253023	-0.985983	-1.81875	-0.754848	4.52437		-2.53639
20180930	1.91	1.46977	-1.93823	-1.34401	0.96575	1.14481	0.559409	0.288165	-1.00869	-1.82556	-0.754915	4.52281		-1.81248
20181001	0.42	0.0166377	-1.06154	-1.99573	0.474519	1.03775	0.545176	0.322443	-1.03103	-1.83232	-0.754977	4.52125		-3.04063
20181002	0.42	-0.104697	-0.132008	-2.13159	-0.0224762	0.907948	0.528798	0.355872	-1.05302	-1.83903	-0.755035	4.51969		-2.3683
20181003	0.42	-0.586147	0.539293	-1.85105	-0.488782	0.759751	0.51052	0.388467	-1.07465	-1.8457	-0.755089	4.51813		-1.89791
20181004	1.78	1.02798	0.633227	-1.29272	-0.891654	0.597523	0.490589	0.420244	-1.09592	-1.85231	-0.755139	4.51657		0.36848
20181005	0.284	-0.816855	0.330312	-0.634448	-1.20433	0.425601	0.469253	0.451218	-1.11682	-1.85888	-0.755184	4.51502		-1.12099
20181006	0.247	-0.587614	0.220845	-0.044028	-1.41025	0.248136	0.446757	0.481403	-1.13737	-1.86539	-0.755225	4.51346		-0.410797
20181007	1.64	1.08028	0.226212	0.38824	-1.50546	0.0689978	0.423347	0.510819	-1.15755	-1.87185	-0.755262	4.5119		1.69473
20181008	0.863	-0.325624	0.00482389	0.649311	-1.49627	-0.108139	0.399268	0.539482	-1.17737	-1.87826	-0.755294	4.51035		0.328511
20181009	0.325	-0.198384	-0.216965	0.760421	-1.3965	-0.279773	0.374767	0.567414	-1.19684	-1.88462	-0.755323	4.50879		0.345073
20181010	0.37	-0.540151	-0.0206851	0.746794	-1.22279	-0.44272	0.350098	0.594631	-1.21594	-1.89092	-0.755347	4.50724		0.185958
20181011	1.78	0.997077	0.271012	0.642478	-0.99461	-0.594148	0.325511	0.621154	-1.23469	-1.89717	-0.755366	4.50569		1.91057
20181012	0.247	-0.449183	0.177759	0.47731	-0.732826	-0.731561	0.301252	0.647	-1.25307	-1.90337	-0.755382	4.50413		0.205886
20181013	0.214	-0.216473	-0.203827	0.280817	-0.457947	-0.852865	0.277559	0.67219	-1.27111	-1.90951	-0.755393	4.50258		-0.139482
20181014	0.187	0.196787	-0.395156	0.0909312	-0.188296	-0.956352	0.254668	0.696742	-1.28878	-1.9156	-0.7554	4.50103		-0.107438
20181015	0.163	-0.10357	-0.153575	-0.0680637	0.0615132	-1.04089	0.232813	0.720673	-1.30611	-1.92163	-0.755402	4.49948		-0.325209
20181016	0.187	-0.444183	0.260976	-0.179741	0.27951	-1.10583	0.212229	0.744	-1.32308	-1.9276	-0.7554	4.49793		-0.362947
20181017	1.57	0.693773	0.417509	-0.242236	0.456993	-1.15068	0.193149	0.766738	-1.33971	-1.93352	-0.755394	4.49638		0.869046
20181018	0.187	-0.245608	0.103398	-0.248594	0.586481	-1.17488	0.17578	0.788902	-1.35598	-1.93938	-0.755384	4.49483		-0.390804
20181019	0.187	-0.226043	-0.278568	-0.187343	0.662017	-1.17778	0.160275	0.810505	-1.37192	-1.94518	-0.755369	4.49328		-0.691953
20181020	0.474	0.0408979	-0.338868	-0.0521205	0.681614	-1.15926	0.146716	0.831561	-1.38751	-1.95092	-0.75535	4.49173		-0.350091
20181021	0.596	-0.0718309	-0.0639149	0.128272	0.646581	-1.1198	0.135099	0.852079	-1.40276	-1.9566	-0.755327	4.49018		-0.00747429
20181022	1.91	0.449648	0.256755	0.299529	0.560758	-1.06048	0.125372	0.872067	-1.41768	-1.96222	-0.755299	4.48863		1.00593
20181023	1.78	0.386468	0.294169	0.414703	0.431201	-0.982712	0.117441	0.891531	-1.43226	-1.96779	-0.755267	4.48709		1.09534
20181024	0.284	-0.452752	0.0393665	0.444149	0.26952	-0.888354	0.111203	0.910475	-1.44651	-1.97329	-0.755231	4.48554		0.0307635
20181025	0.247	-0.668228	-0.178821	0.380492	0.0903286	-0.779654	0.106548	0.928901	-1.46043	-1.97872	-0.755191	4.48399		-0.466557
20181026	1.57	1.02241	-0.200879	0.244817	-0.0910384	-0.659098	0.103365	0.946806	-1.47402	-1.9841	-0.755146	4.48245		1.06634
20181027	0.247	-0.249782	-0.192118	0.0723762	-0.260212	-0.529214	0.101538	0.964189	-1.48728	-1.98941	-0.755096	4.4809		-0.369524
20181028	0.247	-0.229118	-0.142524	-0.12767	-0.404129	-0.392521	0.100947	0.981045	-1.50023	-1.99466	-0.755043	4.47936		-0.499312
20181029	0.284	0.0505283	0.0571284	-0.36297	-0.509604	-0.251511	0.101468	0.99737	-1.51285	-1.99985	-0.754985	4.47782		-0.255313
20181030	0.187	-0.349364	0.403362	-0.624335	-0.565506	-0.108574	0.102981	1.01316	-1.52515	-2.00497	-0.754923	4.47627		-0.570336
20181031	1.64	0.615235	0.644311	-0.871746	-0.564465	0.0340056	0.105366	1.0284	-1.53713	-2.01002	-0.754856	4.47473		0.3878
20181101	0.214	-0.67386	0.474181	-1.04623	-0.503952	0.173994	0.108512	1.04311	-1.5488	-2.01501	-0.754785	4.47319		-1.24591
20181102	0.214	0.384902	-0.0985542	-1.06832	-0.387877	0.309203	0.112309	1.05725	-1.56016	-2.01993	-0.754709	4.47165		-0.781972
20181103	0.247	0.265776	-0.855139	-0.876685	-0.227348	0.437552	0.116653	1.07084	-1.5712	-2.02479	-0.75463	4.47011		-1.46605
20181104	0.14	0.53647	-1.51067	-0.462102	-0.0386407	0.557035	0.121446	1.08385	-1.58193	-2.02957	-0.754546	4.46857		-1.4363
20181105	0.163	-0.788635	-1.36441	0.131102	0.160273	0.665682	0.126597	1.09628	-1.59236	-2.03429	-0.754457	4.46703		-2.02195
20181106	2.13	-0.767381	-0.106681	0.789883	0.351746	0.761569	0.132021	1.10813	-1.60247	-2.03894	-0.754364	4.46549		-0.0841794
20181107	5.74	0.228489	1.46585	1.34324	0.518458	0.84288	0.137632	1.11938	-1.61228	-2.04352	-0.754267	4.46395		3.03757
20181108	8.12	1.73679	1.89513	1.61681	0.644086	0.907984	0.143348	1.13002	-1.62179	-2.04803	-0.754166	4.46241		5.24874
20181109	4.04	-1.10081	0.721632	1.5101	0.717045	0.955583	0.149089	1.14005	-1.631	-2.05247	-0.75406	4.46088		1.13093
20181110	2.96	-0.471528	-0.663779	1.08084	0.736118	0.984928	0.154776	1.14946	-1.6399	-2.05684	-0.753949	4.45934		-0.0544645
20181111	2.49	0.168542	-0.959617	0.444676	0.707916	0.995979	0.160328	1.15823	-1.64851	-2.06114	-0.753834	4.4578		-0.346399
20181112	2.49	0.261568	-0.381803	-0.251826	0.641838	0.989444	0.165667	1.16638	-1.65681	-2.06537	-0.753715	4.45627		-0.372061
20181113	2.19	0.242064	0.104754	-0.840353	0.547688	0.96669	0.170727	1.1739	-1.66482	-2.06952	-0.753592	4.45473		-0.493534
20181114	1.28	-0.0992766	0.0478399	-1.19396	0.434961	0.929442	0.175453	1.18078	-1.67252	-2.0736	-0.753464	4.4532		-1.24539
20181115	0.37	-0.454944	-0.333149	-1.26368	0.311627	0.879478	0.179795	1.18703	-1.67993	-2.07761	-0.753331	4.45167		-2.05178
20181116	0.42	-0.0481662	-0.62054	-1.05401	0.184769	0.818589	0.183701	1.19264	-1.68704	-2.08154	-0.753195	4.45013		-1.72272
20181117	1.91	0.849474	-0.526639	-0.632998	0.0600426	0.748589	0.187124	1.19762	-1.69384	-2.0854	-0.753053	4.4486		-0.310163
20181118	0.663	-1.21896	0.00769771	-0.129929	-0.056805	0.671314	0.19002	1.20197	-1.70035	-2.08918	-0.752908	4.44707		-1.34119
20181119	3.55	0.678459	0.673921	0.317962	-0.159704	0.588563	0.192355	1.20569	-1.70656	-2.09289	-0.752758	4.44554		1.67034
20181120	2.9	0.158973	0.887049	0.603981	-0.243204	0.502111	0.194095	1.20879	-1.71247	-2.09652	-0.752603	4.444		1.65
20181121	2.38	-0.505287	0.54153	0.688185	-0.304892	0.413704	0.195211	1.21127	-1.71807	-2.10008	-0.752444	4.44247		0.724429
20181122	2.13	0.36481	-0.0299404	0.596453	-0.345746	0.324939	0.195674	1.21314	-1.72338	-2.10356	-0.752281	4.44094		0.931322
20181123	0.789	-0.328881	-0.531852	0.407023	-0.368692	0.237254	0.195458	1.2144	-1.72839	-2.10696	-0.752113	4.43941		-0.45371
20181124	0.789	0.221043	-0.780643	0.202496	-0.377628	0.15195	0.194536	1.21507	-1.7331	-2.11029	-0.751941	4.43789		-0.357104
20181125	0.596	-0.204058	-0.507094	0.0365699	-0.375593	0.0702	0.192889	1.21514	-1.73751	-2.11354	-0.751765	4.43636		-0.674582
20181126	0.533	-0.291377	0.193713	-0.079653	-0.364087	-0.00700739	0.190498	1.21463	-1.74161	-2.11671	-0.751583	4.43483		-0.177317
20181127	2.08	0.792467	0.642619	-0.16447	-0.343019	-0.0788874	0.187356	1.21353	-1.74543	-2.1198	-0.751398	4.4333		1.27062
20181128	0.42	-0.545169	0.434902	-0.243204	-0.312336	-0.144792	0.183459	1.21186	-1.74894	-2.12282	-0.751208	4.43178		-0.353471
20181129	0.42	-0.376919	0.0326776	-0.31628	-0.273043	-0.204185	0.178815	1.20963	-1.75216	-2.12576	-0.751013	4.43025		-0.660521
20181130	0.42	0.298746	-0.146993	-0.369059	-0.226396	-0.256651	0.173435	1.20683	-1.75507	-2.12862	-0.750815	4.42872		-0.217305
20181201	0.42	0.165383	-0.260755	-0.372279	-0.173975	-0.301898	0.167336	1.20347	-1.7577	-2.1314	-0.750611	4.4272		-0.467652
20181202	0.42	-0.156148	-0.329863	-0.304718	-0.11831	-0.339733	0.160535	1.19956	-1.76002	-2.1341	-0.750403	4.42568		-0.790729
20181203	0.37	-0.177179	-0.131283	-0.171773	-0.062927	-0.370125	0.153053	1.19511	-1.76205	-2.13672	-0.750191	4.42415		-0.480235
20181204	0.284	-0.498165	0.20837	0.00310505	-0.0108387	-0.393245	0.144923	1.19012	-1.76379	-2.13927	-0.749974	4.42263		-0.28669
20181205	1.91	0.847843	0.28847	0.180287	0.0353607	-0.409356	0.136189	1.18461	-1.76523	-2.14173	-0.749753	4.42111		1.3166
20181206	0.42	-0.417564	0.0639392	0.314375	0.0736275	-0.418771	0.126901	1.17858	-1.76638	-2.14412	-0.749527	4.41958		-0.0392496
20181207	0.42	-0.431843	-0.0723942	0.371234	0.102096	-0.421822	0.117119	1.17204	-1.76723	-2.14643	-0.749297	4.41806		-0.133003
20181208	1.78	0.851318	0.00039731	0.338824	0.119486	-0.418888	0.106912	1.16501	-1.76778	-2.14866	-0.749062	4.41654		1.19054
20181209	0.325	-0.853048	0.110442	0.235848	0.125792	-0.410437	0.0963528	1.15749	-1.76805	-2.15081	-0.748823	4.41502		-0.506758
20181210	1.64	0.923068	0.11476	0.0995088	0.122483	-0.397062	0.0855222	1.14949	-1.76801	-2.15289	-0.748579	4.4135		1.13734
20181211	0.247	-0.216776	-0.0655918	-0.024138	0.112261	-0.379511	0.074503	1.14104	-1.76769	-2.15488	-0.748331	4.41198		-0.306506
20181212	0.215	-0.23242	-0.227746	-0.101482	0.0978582	-0.358619	0.0633787	1.13212	-1.76707	-2.1568	-0.748078	4.41046		-0.561648
20181213	0.215	-0.113895	-0.125602	-0.130841	0.0819704	-0.33524	0.0522278	1.12276	-1.76615	-2.15864	-0.747821	4.40895		-0.370339
20181214	0.214	-0.439605	0.204733	-0.125927	0.0673164	-0.310167	0.0411251	1.11297	-1.76494	-2.1604	-0.747559	4.40743		-0.3608
20181215	1.57	1.07952	0.386355	-0.104594	0.0554314	-0.28415	0.0301432	1.10275	-1.76344	-2.16209	-0.747293	4.40591		1.36129
20181216	0.215	-0.639367	0.188378	-0.0781716	0.0465267	-0.257871	0.019354	1.09211	-1.76164	-2.1637	-0.747022	4.40439		-0.52916
20181217	0.214	0.149468	-0.138446	-0.0532162	0.0406262	-0.231934	0.0088253	1.08107	-1.75954	-2.16523	-0.746747	4.40288		-0.0421945
20181218	0.214	0.0860644	-0.308233	-0.0281355	0.0378514	-0.206844	-0.00137579	1.06963	-1.75715	-2.16668	-0.746467	4.40136		-0.250304
20181219	0.214	-0.188865	-0.299396	0.00112254	0.0380125	-0.183013	-0.0111841	1.05781	-1.75446	-2.16806	-0.746182	4.39985		-0.487138
20181220	0.214	0.375401	-0.15363	0.0276597	0.0405865	-0.160748	-0.0205367	1.0456	-1.75147	-2.16936	-0.745893	4.39833		0.24943
20181221	0.215	-0.547355	0.233814	0.0446537	0.0444128	-0.140318	-0.0293705	1.03302	-1.74819	-2.17059	-0.7456	4.39682		-0.268888
20181222	1.64	0.700574	0.473946	0.0557289	0.0484274	-0.121933	-0.0376266	1.02007	-1.74461	-2.17174	-0.745302	4.39531		1.23025
20181223	0.284	-0.344376	0.236282	0.0620214	0.0512298	-0.105783	-0.0452529	1.00676	-1.74073	-2.17281	-0.745	4.39379		-0.0460726
20181224	0.247	-0.316707	-0.103798	0.0758325	0.0515914	-0.0920071	-0.0522125	0.993097	-1.73656	-2.17381	-0.744693	4.39228		-0.344672
20181225	0.42	0.0389697	-0.305892	0.0990229	0.0488734	-0.0805766	-0.0584779	0.979084	-1.73209	-2.17473	-0.744381	4.39077		-0.167899
20181226	0.474	0.11544	-0.328217	0.117408	0.0430123	-0.0713502	-0.0640279	0.964724	-1.72732	-2.17558	-0.744065	4.38926		-0.0953693
20181227	0.37	-0.262954	-0.108739	0.123218	0.0348492	-0.0640914	-0.068848	0.950025	-1.72226	-2.17636	-0.743745	4.38775		-0.248475
20181228	0.42	-0.264675	0.209219	0.107723	0.0258125	-0.0585736	-0.072929	0.93499	-1.7169	-2.17706	-0.74342	4.38624		0.0522668
20181229	1.78	0.656511	0.32749	0.0659293	0.017371	-0.0545926	-0.0762655	0.919624	-1.71124	-2.17768	-0.74309	4.38473		1.04993
20181230	0.325	-0.332895	0.16666	0.00369175	0.0106272	-0.0519238	-0.0788563	0.903933	-1.70529	-2.17824	-0.742756	4.38322		-0.162542
20181231	0.284	-0.241412	-0.0151799	-0.0653008	0.00641794	-0.0503197	-0.0807008	0.887921	-1.69904	-2.17872	-0.742417	4.38171		-0.321893
20190101	0.284	0.0935772	-0.122106	-0.125709	0.00523654	-0.0495308	-0.0818008	0.871594	-1.6925	-2.17912	-0.742074	4.38021		-0.154237
20190102	0.247	0.287212	-0.212402	-0.153879	0.00634571	-0.0493367	-0.0821661	0.854959	-1.68567	-2.17946	-0.741726	4.3787		-0.0790685
20190103	0.215	-0.222377	-0.234222	-0.136872	0.00905808	-0.0495772	-0.0818151	0.838025	-1.67854	-2.17972	-0.741374	4.37719		-0.593471
20190104	0.247	0.0755888	-0.246897	-0.0744487	0.0121854	-0.0501083	-0.0807755	0.820799	-1.67111	-2.17991	-0.741017	4.37569		-0.245757
20190105	0.247	0.0608459	-0.15488	0.0171194	0.0144735	-0.0507534	-0.0790786	0.803291	-1.66339	-2.18002	-0.740656	4.37418		-0.0769145
20190106	0.284	-0.664958	0.202681	0.100645	0.015468	-0.0513348	-0.0767576	0.785511	-1.65538	-2.18007	-0.74029	4.37268		-0.361633
20190107	1.78	1.1377	0.482448	0.141469	0.0147617	-0.0516579	-0.0738479	0.767467	-1.64708	-2.18004	-0.73992	4.37117		1.76162
20190108	0.284	-0.275254	0.317955	0.123687	0.0119054	-0.0514881	-0.0703861	0.749171	-1.63848	-2.17995	-0.739545	4.36967		0.166388
20190109	0.247	-0.241884	-0.0854313	0.0575083	0.00654434	-0.05061	-0.0664114	0.730632	-1.62959	-2.17978	-0.739166	4.36817		-0.269807
20190110	0.215	0.205594	-0.306907	-0.0277534	-0.00121629	-0.0488061	-0.0619631	0.711859	-1.62041	-2.17954	-0.738782	4.36667		-0.129067
20190111	0.247	0.198597	-0.247317	-0.0935791	-0.010096	-0.0459152	-0.0570811	0.692863	-1.61094	-2.17923	-0.738393	4.36516		-0.142299
20190112	0.247	-0.102291	-0.0953063	-0.108095	-0.0192094	-0.0418375	-0.0518101	0.673654	-1.60118	-2.17886	-0.738	4.36366		-0.305692
20190113	0.325	0.163166	-0.0324349	-0.0717378	-0.0279286	-0.0365326	-0.0461995	0.65424	-1.59114	-2.17841	-0.737603	4.36216		0.0589938
20190114	0.325	-0.176643	-0.037822	-0.0105004	-0.0357243	-0.0299966	-0.0403048	0.634634	-1.5808	-2.17789	-0.737201	4.36066		-0.224966
20190115	0.325	0.165329	0.0419477	0.0388565	-0.042192	-0.0223194	-0.0341866	0.614843	-1.57017	-2.17731	-0.736794	4.35916		0.246133
20190116	1.01	0.302576	0.180273	0.0575114	-0.0467433	-0.0136304	-0.0279085	0.59488	-1.55926	-2.17665	-0.736383	4.35766		0.540361
20190117	0.474	-0.182335	0.233687	0.0478398	-0.0493849	-0.00406858	-0.0215357	0.574754	-1.54807	-2.17593	-0.735968	4.35616		0.0991918
20190118	0.37	-0.14189	0.0876303	0.0285835	-0.0505471	0.00620344	-0.0151336	0.554478	-1.53658	-2.17514	-0.735548	4.35467		-0.025676
20190119	0.325	0.248547	-0.174163	0.0281023	-0.0510528	0.0170071	-0.00876647	0.534063	-1.52482	-2.17429	-0.735123	4.35317		0.102486
20190120	0.325	-0.191865	-0.35704	0.0628001	-0.0517042	0.0281828	-0.00249528	0.513521	-1.51277	-2.17336	-0.734694	4.35167		-0.486105
20190121	0.37	-0.037199	-0.232452	0.116958	-0.0521438	0.0396093	0.00362325	0.492863	-1.50043	-2.17237	-0.73426	4.35018		-0.152693
20190122	0.284	-0.370582	0.156618	0.156438	-0.051116	0.0512135	0.00953865	0.4721	-1.48782	-2.17132	-0.733822	4.34868		-0.0575267
20190123	1.97	0.773267	0.333329	0.151629	-0.0468523	0.0629025	0.015205	0.451243	-1.47493	-2.17019	-0.73338	4.34718		1.25822
20190124	0.474	-0.154982	0.0907943	0.0859908	-0.0381636	0.074519	0.0205771	0.430301	-1.46176	-2.169	-0.732933	4.34569		0.0218027
20190125	0.284	-0.0437692	-0.154192	-0.0308464	-0.0247477	0.0858285	0.0256103	0.409282	-1.44831	-2.16775	-0.732481	4.3442		-0.228807
20190126	0.284	0.156559	-0.10639	-0.163212	-0.00651765	0.0965231	0.0302647	0.388196	-1.43458	-2.16643	-0.732025	4.3427		-0.113043
20190127	0.247	-0.22328	0.0551838	-0.265652	0.015669	0.106269	0.0345051	0.367048	-1.42057	-2.16504	-0.731564	4.34121		-0.433748
20190128	0.215	-0.134961	0.110519	-0.303015	0.0404517	0.114719	0.0382971	0.345845	-1.40629	-2.16359	-0.731099	4.33972		-0.327457
20190129	0.474	0.360712	0.068538	-0.264386	0.0663109	0.121562	0.041608	0.324595	-1.39174	-2.16208	-0.730629	4.33823		0.164864
20190130	0.284	0.0327939	-0.0274466	-0.166563	0.0914766	0.126516	0.0444082	0.303304	-1.37691	-2.1605	-0.730155	4.33673		-0.161216
20190131	0.533	0.0353698	-0.179014	-0.0440358	0.11352	0.129374	0.0466745	0.28198	-1.36181	-2.15886	-0.729676	4.33524		-0.18768
20190201	0.37	-0.319202	-0.124318	0.0571338	0.130031	0.130026	0.0483957	0.260632	-1.34644	-2.15715	-0.729193	4.33375		-0.386386
20190202	0.37	-0.382552	0.226958	0.108347	0.139419	0.128399	0.0495655	0.239266	-1.33079	-2.15538	-0.728705	4.33226		-0.0472464
20190203	2.08	1.20412	0.466073	0.10542	0.141101	0.124435	0.0501788	0.217891	-1.31488	-2.15355	-0.728213	4.33077		1.77561
20190204	0.474	-0.517254	0.245239	0.0608011	0.135053	0.118181	0.0502331	0.196514	-1.2987	-2.15166	-0.727716	4.32929		-0.211214
20190205	0.325	-0.140616	-0.176393	0.00701052	0.121537	0.109743	0.0497297	0.175145	-1.28226	-2.1497	-0.727215	4.3278		-0.309999
20190206	0.325	0.13343	-0.405867	-0.0140609	0.101566	0.0993138	0.0486702	0.153792	-1.26555	-2.14769	-0.726709	4.32631		-0.286498
20190207	0.325	0.255558	-0.354406	0.00764208	0.0763442	0.0871828	0.0470592	0.132465	-1.24857	-2.14561	-0.726199	4.32482		-0.0912064
20190208	0.284	-0.180618	-0.185792	0.0635589	0.047403	0.0736636	0.044908	0.111172	-1.23133	-2.14347	-0.725684	4.32334		-0.302851
20190209	0.474	-0.175436	0.0511927	0.132434	0.0165318	0.0590972	0.0422326	0.0899224	-1.21383	-2.14127	-0.725165	4.32185		0.00819119
20190210	0.247	-0.0044883	0.257894	0.182168	-0.0148336	0.0438237	0.039049	0.0687268	-1.19607	-2.13901	-0.724641	4.32037		0.435574
20190211	1.91	0.755426	0.298151	0.179684	-0.045331	0.0281619	0.0353725	0.0475951	-1.17805	-2.13669	-0.724113	4.31888		1.23326
20190212	0.247	-0.603333	0.161742	0.115898	-0.0734304	0.0124282	0.0312187	0.0265376	-1.15977	-2.13431	-0.72358	4.3174		-0.325694
20190213	0.42	0.243352	0.0413385	0.00251603	-0.0971336	-0.00308586	0.0266058	0.00556467	-1.14124	-2.13187	-0.723043	4.31592		0.287207
20190214	0.214	0.0655432	-0.00575662	-0.13096	-0.114811	-0.0180737	0.0215569	-0.0153141	-1.12245	-2.12937	-0.722501	4.31443		-0.0711734
20190215	0.214	0.0166193	-0.0567767	-0.238149	-0.125235	-0.032229	0.0161009	-0.0360885	-1.10341	-2.12681	-0.721954	4.31295		-0.278306
20190216	0.187	0.125684	-0.167388	-0.279435	-0.127968	-0.0452663	0.0102669	-0.0567475	-1.08412	-2.1242	-0.721404	4.31147		-0.321139
20190217	0.187	0.143826	-0.176544	-0.24188	-0.123303	-0.0569026	0.00408366	-0.0772801	-1.06458	-2.12152	-0.720848	4.30999		-0.274597
20190218	0.187	-0.0218806	-0.11152	-0.137207	-0.112549	-0.0668595	-0.00241898	-0.0976745	-1.04479	-2.11879	-0.720288	4.30851		-0.270607
20190219	0.163	-0.00985927	-0.107148	0.00880627	-0.0968758	-0.0749466	-0.00921024	-0.117919	-1.02475	-2.116	-0.719724	4.30703		-0.108201
20190220	0.163	0.166263	-0.0760484	0.154378	-0.0775254	-0.0811324	-0.0162594	-0.138001	-1.00447	-2.11316	-0.719155	4.30555		0.244593
20190221	0.187	-0.692129	0.122422	0.260223	-0.0559596	-0.0854351	-0.0235385	-0.15791	-0.983949	-2.11026	-0.718582	4.30407		-0.309485
20190222	1.46	0.873034	0.313358	0.300937	-0.03462	-0.0879169	-0.031019	-0.177633	-0.963186	-2.1073	-0.718004	4.30259		1.48733
20190223	0.214	-0.342082	0.206125	0.267132	-0.0157526	-0.088706	-0.0386711	-0.197155	-0.942185	-2.10428	-0.717422	4.30111		0.131175
20190224	0.14	-0.352144	-0.0481554	0.175	-0.00063035	-0.0880263	-0.0464671	-0.216463	-0.920948	-2.10121	-0.716835	4.29963		-0.2253
20190225	0.163	0.374856	-0.112599	0.0560816	0.0102646	-0.0861599	-0.0543852	-0.235541	-0.899477	-2.09809	-0.716244	4.29816		0.318339
20190226	0.14	-0.164023	-0.00953091	-0.0530042	0.0169604	-0.0834028	-0.0624174	-0.254374	-0.877775	-2.09491	-0.715648	4.29668		-0.226558
20190227	0.163	-0.0554714	0.0525471	-0.123023	0.0210545	-0.0799943	-0.0705639	-0.272948	-0.855843	-2.09167	-0.715048	4.29521		-0.125947
20190228	0.187	-0.196798	-0.00982633	-0.143072	0.0243655	-0.0761597	-0.0788275	-0.291245	-0.833685	-2.08838	-0.714443	4.29373		-0.349696
20190301	0.214	-0.0551828	-0.147462	-0.111944	0.0280464	-0.0721318	-0.0872112	-0.309251	-0.811304	-2.08504	-0.713834	4.29226		-0.314589
20190302	0.187	0.0742937	-0.226125	-0.0446139	0.0327075	-0.0681201	-0.0957195	-0.326948	-0.788703	-2.08164	-0.71322	4.29078		-0.196445
20190303	0.1734	-0.219144	-0.0663875	0.0375363	0.0381933	-0.0643178	-0.10436	-0.344321	-0.765884	-2.07819	-0.712602	4.28931		-0.247995
20190304	0.1598	-0.116799	0.208468	0.108584	0.0434654	-0.0609332	-0.113143	-0.361356	-0.742851	-2.07468	-0.711979	4.28784		0.200254
20190305	0.1462	0.247457	0.330837	0.136204	0.0465008	-0.0581339	-0.122085	-0.378037	-0.719607	-2.07113	-0.711352	4.28636		0.714498
20190306	0.1326	-0.179292	0.188167	0.105801	0.0457997	-0.0560279	-0.131202	-0.394351	-0.696157	-2.06752	-0.71072	4.28489		0.114675
20190307	0.119	-0.203747	-0.0357801	0.0280383	0.0408701	-0.0546453	-0.140508	-0.410283	-0.672502	-2.06385	-0.710084	4.28342		-0.211488
20190308	0.084	0.266897	-0.148978	-0.0685704	0.0315786	-0.0539501	-0.150032	-0.425817	-0.648648	-2.06014	-0.709443	4.28195		0.0493492
20190309	0.069	0.0487978	-0.121192	-0.141713	0.0179365	-0.0538704	-0.159806	-0.440938	-0.624598	-2.05638	-0.708798	4.28048		-0.214107
20190310	0.069	0.0222147	-0.0381426	-0.169473	0.000986371	-0.0542164	-0.169861	-0.455628	-0.600354	-2.05256	-0.708148	4.27901		-0.185401
20190311	0.069	-0.049152	0.00627056	-0.155952	-0.0177716	-0.0546904	-0.180226	-0.469872	-0.575922	-2.04869	-0.707494	4.27754		-0.198833
20190312	0.074	0.186852	-0.0169568	-0.114052	-0.0367881	-0.0549865	-0.190929	-0.483652	-0.551304	-2.04477	-0.706835	4.27607		0.0558424
20190313	0.079	-0.0210149	-0.0603298	-0.0606976	-0.0542867	-0.0548594	-0.201999	-0.496953	-0.526504	-2.04081	-0.706172	4.27461		-0.142042
20190314	0.084	-0.0784331	-0.0775635	-0.0134905	-0.0686493	-0.0540738	-0.213467	-0.509759	-0.501526	-2.03679	-0.705504	4.27314		-0.169487
20190315	0.084	-0.215707	-0.0360578	0.0180085	-0.0784732	-0.0524161	-0.225369	-0.522053	-0.476373	-2.03272	-0.704832	4.27167		-0.233756
20190316	0.084	0.219053	0.0899176	0.0299848	-0.0827722	-0.0497195	-0.237742	-0.533821	-0.451051	-2.0286	-0.704155	4.27021		0.338956
20190317	0.284	-0.102027	0.104992	0.0280976	-0.0811203	-0.045886	-0.250622	-0.545046	-0.425563	-2.02443	-0.703474	4.26874		0.0310629
20190318	0.1	-0.0221774	0.0142338	0.0129867	-0.07314	-0.0408777	-0.264039	-0.555713	-0.399914	-2.02022	-0.702789	4.26728		0.00504321
20190319	0.084	-0.191546	-0.086612	0.000351412	-0.0592063	-0.0346823	-0.278015	-0.565808	-0.374108	-2.01595	-0.702099	4.26581		-0.277807
20190320	0.084	-0.0194376	-0.126334	-0.00233241	-0.040125	-0.0273576	-0.292573	-0.575316	-0.348148	-2.01164	-0.701404	4.26435		-0.148104
20190321	0.084	-0.0195605	-0.0517036	-0.00263573	-0.0172124	-0.0189981	-0.307734	-0.584221	-0.322041	-2.00728	-0.700705	4.26288		-0.0738998
20190322	0.187	-0.0416011	0.0214081	-0.00542506	0.00714202	-0.00980428	-0.323521	-0.592509	-0.295791	-2.00287	-0.700001	4.26142		-0.025618
20190323	0.474	0.0714802	-0.00919391	-0.0104402	0.0306307	-1.98109e-05	-0.339955	-0.600161	-0.269401	-1.99841	-0.699293	4.25996		0.0518461
20190324	0.596	-0.100584	-0.108499	-0.00858715	0.0520719	0.0101183	-0.35705	-0.607163	-0.242877	-1.99391	-0.698581	4.2585		-0.21767
20190325	0.325	-0.0219533	-0.100135	0.00135922	0.070813	0.0203524	-0.374812	-0.613495	-0.216225	-1.98936	-0.697864	4.25704		-0.120729
20190326	0.247	-0.629579	0.156167	0.00823771	0.0853767	0.0304916	-0.393236	-0.619142	-0.189449	-1.98476	-0.697142	4.25558		-0.465174
20190327	1.71	1.15644	0.3866	0.0118374	0.0935783	0.0403579	-0.412307	-0.624085	-0.162555	-1.98012	-0.696416	4.25412		1.55488
20190328	0.215	-0.66757	0.132693	0.0126569	0.0935751	0.0497936	-0.432001	-0.628308	-0.13555	-1.97543	-0.695686	4.25266		-0.52222
20190329	0.215	-0.0514019	-0.306483	0.0100891	0.0852952	0.0586507	-0.452291	-0.631795	-0.108438	-1.97069	-0.694951	4.2512		-0.347796
20190330	0.187	0.0453507	-0.375421	0.00531441	0.0698365	0.0667694	-0.473136	-0.634531	-0.0812271	-1.96591	-0.694212	4.24974		-0.324756
20190331	0.37	0.143779	-0.154196	0.00271	0.0483658	0.0740292	-0.494488	-0.636501	-0.0539222	-1.96108	-0.693468	4.24828		-0.00770688
20190401	0.596	-0.0815857	0.0287137	0.00443322	0.0227011	0.0803512	-0.516286	-0.63769	-0.0265298	-1.95621	-0.69272	4.24682		-0.0484388
20190402	0.284	0.135501	0.174233	0.00884685	-0.00482613	0.0857073	-0.538459	-0.638083	0.000943632	-1.95129	-0.691967	4.24537		0.318581
20190403	0.247	-0.391748	0.277671	0.0232752	-0.0310554	0.0900266	-0.560935	-0.637667	0.0284917	-1.94633	-0.691209	4.24391		-0.0908019
20190404	1.85	0.743959	0.174431	0.0524478	-0.052214	0.093196	-0.58363	-0.63643	0.0561078	-1.94132	-0.690448	4.24246		0.970838
20190405	0.37	-0.48809	-0.0993485	0.0845613	-0.0646048	0.0951148	-0.606454	-0.634361	0.0837852	-1.93627	-0.689681	4.241		-0.502877
20190406	0.284	0.21832	-0.283701	0.0979303	-0.0652026	0.0956641	-0.629311	-0.631447	0.111517	-1.93118	-0.688911	4.23955		0.0325498
20190407	0.215	-0.665801	-0.0545114	0.0769119	-0.051585	0.0947298	-0.652099	-0.627679	0.139296	-1.92604	-0.688136	4.23809		-0.6434
20190408	0.9625	0.05892	0.419819	0.023576	-0.0222438	0.0922547	-0.674707	-0.623046	0.167115	-1.92086	-0.687356	4.23664		0.502315
20190409	1.71	0.869608	0.574431	-0.0542626	0.0238296	0.0882345	-0.697014	-0.617541	0.194967	-1.91563	-0.686572	4.23519		1.38978
20190410	0.187	-0.645767	0.173308	-0.141282	0.0870137	0.0826227	-0.718886	-0.611154	0.222845	-1.91036	-0.685783	4.23374		-0.613741
20190411	0.14	-0.0498918	-0.385777	-0.212916	0.165717	0.0752669	-0.740176	-0.603879	0.25074	-1.90506	-0.68499	4.23228		-0.648585
20190412	0.119	0.477644	-0.697875	-0.243006	0.256314	0.0659721	-0.76073	-0.59571	0.278646	-1.8997	-0.684193	4.23083		-0.463237
20190413	0.1	0.0236585	-0.606126	-0.211312	0.35297	0.0545701	-0.780392	-0.586644	0.306554	-1.89431	-0.683391	4.22938		-0.79378
20190414	0.42	-0.538984	-0.0274267	-0.11866	0.448416	0.0409144	-0.799004	-0.576674	0.334457	-1.88887	-0.682584	4.22793		-0.685071
20190415	2.49	0.429169	0.722196	0.0121113	0.535646	0.0248798	-0.816409	-0.565799	0.362347	-1.8834	-0.681773	4.22648		1.16348
20190416	2.28	0.285015	0.91571	0.144771	0.608118	0.00633095	-0.832447	-0.554016	0.390215	-1.87788	-0.680958	4.22503		1.3455
20190417	1.85	-0.0862544	0.284712	0.243151	0.659405	-0.0148281	-0.846947	-0.541326	0.418054	-1.87232	-0.680138	4.22359		0.441609
20190418	0.42	-0.255714	-0.584704	0.280698	0.683967	-0.0386607	-0.859735	-0.527728	0.445855	-1.86672	-0.679314	4.22214		-0.55972
20190419	0.284	-0.251858	-0.793689	0.256554	0.677289	-0.0649244	-0.87064	-0.513227	0.473611	-1.86108	-0.678485	4.22069		-0.788994
20190420	0.533	-0.921963	-0.189968	0.190023	0.637105	-0.0930093	-0.879496	-0.497827	0.501312	-1.8554	-0.677652	4.21924		-0.921908
20190421	3.33	1.24146	0.503212	0.101736	0.564553	-0.121898	-0.886143	-0.481538	0.528951	-1.84968	-0.676814	4.2178		1.84641
20190422	2.38	0.673024	0.473768	0.00911346	0.463909	-0.150462	-0.890421	-0.464369	0.556519	-1.84392	-0.675972	4.21635		1.1559
20190423	0.596	-0.800382	-0.0954534	-0.0787299	0.340652	-0.177539	-0.892175	-0.446332	0.584008	-1.83813	-0.675126	4.21491		-0.974565
20190424	0.42	-0.104651	-0.321638	-0.16443	0.201081	-0.201948	-0.891273	-0.427438	0.61141	-1.83229	-0.674275	4.21346		-0.590719
20190425	0.325	-0.562408	0.0487986	-0.239136	0.0505538	-0.222424	-0.887606	-0.4077	0.638715	-1.82641	-0.673419	4.21202		-0.752745
20190426	1.91	1.08689	0.314263	-0.292212	-0.1076	-0.237644	-0.881081	-0.387134	0.665916	-1.8205	-0.67256	4.21058		1.10895
20190427	0.284	-0.352647	0.0672163	-0.3112	-0.271586	-0.246372	-0.871617	-0.365757	0.693005	-1.81455	-0.671695	4.20913		-0.59663
20190428	0.163	0.0435991	-0.317859	-0.27118	-0.441893	-0.247568	-0.859146	-0.343587	0.719972	-1.80856	-0.670827	4.20769		-0.545439
20190429	0.163	-0.134464	-0.417813	-0.165135	-0.620379	-0.240343	-0.843617	-0.320645	0.74681	-1.80253	-0.669953	4.20625		-0.717413
20190430	0.214	0.0992343	-0.158393	-0.0191519	-0.809451	-0.224077	-0.825001	-0.296955	0.773511	-1.79647	-0.669076	4.20481		-0.0783104
20190501	0.187	-0.458917	0.29381	0.128202	-1.00891	-0.198582	-0.8033	-0.27254	0.800066	-1.79036	-0.668194	4.20337		-0.0369041
20190502	1.64	0.674162	0.463682	0.220128	-1.21616	-0.164263	-0.77854	-0.247428	0.826466	-1.78423	-0.667307	4.20193		1.35797
20190503	0.187	-0.438009	0.144153	0.230748	-1.42596	-0.121994	-0.750773	-0.221649	0.852705	-1.77805	-0.666416	4.20049		-0.063107
20190504	0.14	0.129257	-0.239851	0.183099	-1.62848	-0.0733171	-0.720095	-0.195232	0.878773	-1.77184	-0.665521	4.19905		0.0725047
20190505	0.163	0.0851549	-0.364887	0.130764	-1.80924	-0.02026	-0.686648	-0.16821	0.904662	-1.76559	-0.664621	4.19761		-0.148968
20190506	0.215	0.0737587	-0.212289	0.116416	-1.95033	0.0348666	-0.650584	-0.140614	0.930364	-1.75931	-0.663717	4.19617		-0.0221139
20190507	0.325	-0.328682	0.193177	0.156443	-2.03105	0.0895172	-0.612061	-0.112476	0.95587	-1.75299	-0.662809	4.19474		0.0209387
20190508	0.533	-0.0896297	0.490838	0.227605	-2.02907	0.141245	-0.571254	-0.0838286	0.981173	-1.74664	-0.661896	4.1933		0.628813
20190509	1.85	1.05445	0.137044	0.271328	-1.92226	0.187856	-0.528341	-0.0547043	1.00626	-1.74025	-0.660978	4.19187		1.46282
20190510	0.285	-0.198973	-0.856398	0.19525	-1.69097	0.22741	-0.483516	-0.025136	1.03113	-1.73383	-0.660056	4.19043		-0.860122
20190511	0.187	-0.104023	-1.2328	-0.115129	-1.32614	0.258352	-0.436987	0.00484286	1.05577	-1.72738	-0.65913	4.18899		-1.45195
20190512	0.247	-1.08144	0.105427	-0.678941	-0.835924	0.279738	-0.388976	0.0351987	1.08018	-1.72089	-0.6582	4.18756		-1.65496
20190513	5.26	1.54167	2.33969	-1.31253	-0.243063	0.291024	-0.33972	0.0658977	1.10434	-1.71436	-0.657265	4.18613		2.56882
20190514	4.93	0.372753	3.02614	-1.76067	0.421142	0.291736	-0.289474	0.0969056	1.12825	-1.70781	-0.656325	4.18469		1.63822
20190515	3.33	0.0330571	1.09784	-1.82272	1.12108	0.281397	-0.238514	0.128188	1.15189	-1.70122	-0.655381	4.18326		-0.691822
20190516	2.19	0.757141	-2.37159	-1.43006	1.81647	0.259537	-0.187141	0.159708	1.17526	-1.6946	-0.654433	4.18183		-3.04451
20190517	2.13	2.00626	-5.10335	-0.561737	2.46031	0.225689	-0.135667	0.191433	1.19836	-1.68794	-0.65348	4.1804		-3.65882
20190518	1.97	-0.760018	-4.43581	0.702004	3.00164	0.179389	-0.084415	0.223326	1.22117	-1.68126	-0.652523	4.17897		-4.49383
20190519	1.23	-8.20815	0.513445	2.02265	3.38665	0.120184	-0.0337102	0.25535	1.24368	-1.67454	-0.651562	4.17754		-5.67205
20190520	24.6	8.67024	5.89587	2.91271	3.56138	0.0477958	0.0161107	0.287471	1.26589	-1.66779	-0.650596	4.17611		17.4788
20190521	9.46	-5.60479	5.41048	2.96088	3.48029	-0.0370637	0.0646984	0.319651	1.28779	-1.66101	-0.649626	4.17468		2.76656
20190522	3.78	-6.26956	1.17086	2.19812	3.13466	-0.131738	0.111706	0.351855	1.30938	-1.6542	-0.648651	4.17325		-2.90057
20190523	2.49	-1.93039	-2.53325	0.948162	2.56469	-0.232152	0.156788	0.384045	1.33063	-1.64736	-0.647672	4.17182		-3.51548
20190524	2	0.548336	-3.47845	-0.410086	1.82369	-0.333934	0.199603	0.416183	1.35154	-1.64049	-0.646689	4.17039		-3.3402
20190525	1.3315	0.623134	-2.34907	-1.51458	0.96567	-0.432709	0.239825	0.448233	1.37212	-1.63359	-0.645701	4.16896		-3.24051
20190526	0.663	-0.472605	-0.635305	-2.11695	0.0447425	-0.524112	0.277139	0.480157	1.39234	-1.62665	-0.644709	4.16754		-3.22486
20190527	1.78	0.80322	0.503277	-2.12013	-0.884634	-0.603794	0.31125	0.511916	1.41219	-1.61969	-0.643712	4.16611		-0.813633
20190528	0.789	-0.027372	0.736918	-1.58227	-1.76879	-0.667432	0.341881	0.543471	1.43169	-1.6127	-0.642711	4.16469		-0.872723
20190529	0.474	-0.630205	0.650687	-0.740481	-2.55559	-0.710752	0.368801	0.57478	1.4508	-1.60569	-0.641706	4.16326		-0.719999
20190530	2.08	0.748305	0.52933	0.125858	-3.19563	-0.72955	0.391841	0.605801	1.46953	-1.59864	-0.640696	4.16184		1.40349
20190531	1.25	0.0283463	0.262076	0.774918	-3.64718	-0.719752	0.410916	0.636489	1.48786	-1.59156	-0.639682	4.16041		1.06534
20190601	0.42	-0.4113	0.0869944	1.04528	-3.88033	-0.677623	0.426049	0.666795	1.5058	-1.58446	-0.638664	4.15899		0.720976
20190602	1.03	0.059494	0.197089	0.890513	-3.88189	-0.600709	0.437363	0.696673	1.52332	-1.57733	-0.637641	4.15757		1.1471
20190603	1.64	0.509847	0.356191	0.350935	-3.65734	-0.489984	0.445059	0.726071	1.54043	-1.57018	-0.636614	4.15615		1.21697
20190604	0.9825	-0.16142	0.466018	-0.445292	-3.22886	-0.349686	0.449406	0.754941	1.55712	-1.56299	-0.635582	4.15472		-0.140694
20190605	0.325	-0.876435	0.687695	-1.30093	-2.62948	-0.185321	0.450702	0.783235	1.57337	-1.55578	-0.634546	4.1533		-1.48967
20190606	2.38	0.991775	0.705349	-1.95659	-1.89824	-0.0025936	0.449255	0.810905	1.58917	-1.54855	-0.633506	4.15188		-0.259462
20190607	1.51	-0.467671	-0.206097	-2.15711	-1.07764	0.192823	0.445375	0.837904	1.60453	-1.54128	-0.632461	4.15046		-2.83088
20190608	0.474	-0.991391	-1.70682	-1.78029	-0.212237	0.395365	0.439371	0.864188	1.61944	-1.534	-0.631412	4.14904		-4.4785
20190609	4.32	1.83511	-2.84846	-0.892755	0.652798	0.599612	0.43155	0.88971	1.63387	-1.52669	-0.630359	4.14762		-1.90611
20190610	9	3.42801	-1.99949	0.278949	1.47118	0.800174	0.422221	0.914426	1.64784	-1.51935	-0.629301	4.14621		1.70746
20190611	5.26	-6.26884	1.87808	1.37063	2.19554	0.991664	0.411689	0.938293	1.66132	-1.51199	-0.628239	4.14479		-3.02013
20190612	22.5	7.00289	4.42736	2.04559	2.77884	1.16869	0.400261	0.961268	1.67432	-1.5046	-0.627173	4.14337		13.4758
20190613	7.7	-5.07922	0.945193	2.08584	3.18066	1.32587	0.388238	0.983309	1.68681	-1.4972	-0.626102	4.14195		-2.04818
20190614	3.55	-4.14422	-3.80552	1.66967	3.37915	1.45799	0.375918	1.00437	1.69881	-1.48977	-0.625027	4.14054		-6.28007
20190615	2.75	-5.17259	-3.25275	1.04035	3.37915	1.56073	0.363597	1.02442	1.71029	-1.48231	-0.623948	4.13912		-7.38499
20190616	16.9	5.37233	0.932121	0.316364	3.20609	1.63162	0.351573	1.04342	1.72125	-1.47483	-0.622864	4.13771		6.62082
20190617	12.4	-0.319784	3.18219	-0.344005	2.89234	1.67014	0.34015	1.06132	1.73168	-1.46734	-0.621776	4.13629		2.5184
20190618	12.4	1.74892	1.87291	-0.793969	2.47255	1.67692	0.329621	1.07809	1.74158	-1.45982	-0.620683	4.13488		2.82786
20190619	6.88	-0.29831	-0.779771	-0.991008	1.98285	1.65294	0.320273	1.09369	1.75094	-1.45227	-0.619587	4.13347		-2.06909
20190620	3.78	-0.448201	-2.94506	-0.979015	1.45837	1.59933	0.312361	1.10808	1.75974	-1.44471	-0.618485	4.13205		-4.37228
20190621	2.9	-0.800644	-2.82326	-0.818998	0.931166	1.51736	0.3061	1.12124	1.76799	-1.43713	-0.61738	4.13064		-4.4429
20190622	2.62	-4.01171	0.135187	-0.583044	0.428951	1.40841	0.301663	1.13312	1.77567	-1.42952	-0.61627	4.12923		-4.45956
20190623	14	4.65032	3.09155	-0.347877	-0.0273811	1.27403	0.299186	1.14371	1.78278	-1.4219	-0.615156	4.12782		7.39399
20190624	5.26	-3.21625	2.4508	-0.177728	-0.422319	1.11598	0.298783	1.15296	1.78931	-1.41426	-0.614038	4.12641		-0.94318
20190625	3.33	-2.36686	-0.122261	-0.0693728	-0.746479	0.936185	0.300549	1.16085	1.79525	-1.4066	-0.612915	4.125		-2.55849
20190626	4.32	1.24021	-1.97561	0.0147897	-0.996941	0.736629	0.304574	1.16735	1.8006	-1.39892	-0.611788	4.12359		-0.720616
20190627	2.96	0.0554233	-1.80971	0.112754	-1.17537	0.519444	0.310939	1.17244	1.80535	-1.39122	-0.610657	4.12218		-1.64153
20190628	2.9	-1.38583	-0.206574	0.20043	-1.2893	0.287099	0.319713	1.17609	1.80949	-1.3835	-0.609521	4.12077		-1.39198
20190629	7.29	1.50185	1.3033	0.239345	-1.34995	0.0424717	0.330962	1.17829	1.81302	-1.37577	-0.608381	4.11936		3.04449
20190630	5.74	0.194173	1.32945	0.212874	-1.37073	-0.211152	0.344742	1.17901	1.81594	-1.36802	-0.607237	4.11796		1.7365
20190701	3.55	-0.691277	0.228138	0.130615	-1.36362	-0.470212	0.361108	1.17825	1.81824	-1.36025	-0.606088	4.11655		-0.332525
20190702	2.9	0.306293	-0.704184	0.0133219	-1.33467	-0.731147	0.38011	1.17599	1.81991	-1.35247	-0.604935	4.11515		-0.384569
20190703	2.38	-0.0877274	-0.726402	-0.100684	-1.28654	-0.990334	0.401796	1.17224	1.82096	-1.34467	-0.603778	4.11374		-0.914813
20190704	2.62	0.123236	-0.191837	-0.16947	-1.21938	-1.24403	0.426211	1.16699	1.82139	-1.33685	-0.602617	4.11233		-0.238071
20190705	3.78	0.620465	0.128074	-0.159686	-1.13226	-1.48861	0.453392	1.16025	1.82118	-1.32902	-0.601451	4.11093		0.588853
20190706	2.62	-0.151633	-0.125296	-0.0625525	-1.02257	-1.72064	0.483373	1.15203	1.82036	-1.32118	-0.600281	4.10953		-0.339481
20190707	2.49	-0.355083	-0.348622	0.0911154	-0.887506	-1.93684	0.516175	1.14233	1.81891	-1.31332	-0.599107	4.10812		-0.612589
20190708	2	-1.0442	0.0743754	0.235623	-0.726205	-2.13389	0.551813	1.13117	1.81684	-1.30545	-0.597928	4.10672		-0.734205
20190709	4.93	1.49307	0.565283	0.289172	-0.541887	-2.3082	0.590289	1.11858	1.81415	-1.29756	-0.596745	4.10532		2.34753
20190710	3.55	-0.256973	0.385026	0.179871	-0.344609	-2.45618	0.631594	1.10458	1.81086	-1.28966	-0.595558	4.10392		0.307923
20190711	2.49	-0.496108	-0.0714256	-0.119728	-0.150074	-2.57456	0.675688	1.0892	1.80695	-1.28174	-0.594367	4.10252		-0.687261
20190712	2.62	0.231721	-0.182254	-0.578842	0.0231536	-2.66035	0.722513	1.07245	1.80245	-1.27382	-0.593171	4.10112		-0.529375
20190713	2.62	0.2294	0.114966	-1.10642	0.155261	-2.71088	0.771978	1.05438	1.79735	-1.26587	-0.591971	4.09972		-0.76205
20190714	2.11	-0.148242	0.404145	-1.56307	0.227363	-2.72396	0.823918	1.03502	1.79166	-1.25792	-0.590767	4.09832		-1.30717
20190715	2.03	0.331021	0.137241	-1.78603	0.225842	-2.69831	0.878081	1.01439	1.78539	-1.24996	-0.589558	4.09692		-1.31777
20190716	1.85	0.629486	-0.731266	-1.63728	0.147865	-2.63368	0.934114	0.992545	1.77853	-1.24198	-0.588346	4.09552		-1.73906
20190717	0.474	-0.564819	-1.36923	-1.05111	-6.30601e-06	-2.53075	0.991576	0.969504	1.7711	-1.23399	-0.587129	4.09412		-2.98516
20190718	0.42	-2.23811	-0.761727	-0.0520804	-0.205086	-2.39105	1.04998	0.945309	1.7631	-1.22599	-0.585908	4.09272		-3.05192
20190719	2.05	-3.00513	0.855198	1.2169	-0.454203	-2.21662	1.10883	0.919997	1.75454	-1.21797	-0.584682	4.09133		-0.933034
20190720	12.9	5.3953	1.63914	2.54009	-0.737052	-2.00976	1.1676	0.893605	1.74543	-1.20995	-0.583453	4.08993		9.57452
20190721	3.78	-3.84979	0.44471	3.7045	-1.04568	-1.77286	1.22576	0.866172	1.73576	-1.20191	-0.582219	4.08854		0.299416
20190722	2.75	-4.59045	-0.770471	4.5851	-1.37328	-1.50848	1.2828	0.837738	1.72555	-1.19387	-0.580981	4.08714		-0.775818
20190723	6.88	-1.24543	-0.323381	5.08109	-1.71154	-1.2194	1.3382	0.808342	1.71481	-1.18581	-0.579739	4.08575		3.51229
20190724	10.4	1.18321	0.989896	5.06203	-2.04731	-0.908833	1.39145	0.778027	1.70353	-1.17774	-0.578492	4.08435		7.23514
20190725	13.5	3.83362	1.365	4.40212	-2.35942	-0.580384	1.44203	0.746833	1.69173	-1.16967	-0.577241	4.08296		9.60074
20190726	4.93	-1.86195	0.264811	3.07974	-2.62042	-0.237763	1.48947	0.714801	1.67941	-1.16158	-0.575986	4.08157		1.4826
20190727	2.9	-1.13013	-0.803376	1.25477	-2.80526	0.115059	1.53324	0.681974	1.66657	-1.15348	-0.574727	4.08017		-0.67874
20190728	2.19	-0.306005	-0.479551	-0.887836	-2.88989	0.473743	1.57287	0.648394	1.65323	-1.14537	-0.573464	4.07878		-1.67339
20190729	2.13	0.472539	0.570819	-3.1498	-2.84208	0.833654	1.60785	0.614107	1.63939	-1.13726	-0.572196	4.07739		-2.10644
20190730	0.596	-0.276725	1.46617	-5.27782	-2.62372	1.18984	1.63769	0.579157	1.62505	-1.12913	-0.570925	4.076		-4.08837
20190731	0.663	-0.133543	2.2639	-7.0183	-2.20441	1.53707	1.66192	0.54359	1.61023	-1.12099	-0.569649	4.07461		-4.88794
20190801	3.14	2.594	2.33489	-8.00002	-1.58053	1.8697	1.68004	0.507454	1.59493	-1.11285	-0.568369	4.07322		-3.07114
20190802	2.28	2.97892	-0.272432	-7.78986	-0.775271	2.18149	1.69158	0.470798	1.57915	-1.1047	-0.567085	4.07183		-5.08338
20190803	2.13	5.37649	-5.50316	-6.18614	0.161931	2.46602	1.69606	0.433671	1.5629	-1.09653	-0.565796	4.07044		-6.31281
20190804	1.85	3.96722	-8.98093	-3.26117	1.1616	2.71689	1.693	0.396127	1.54618	-1.08836	-0.564504	4.06906		-8.27488
20190805	1.97	-3.94037	-5.80039	0.627519	2.14626	2.92768	1.68193	0.358218	1.52901	-1.08019	-0.563207	4.06767		-9.11325
20190806	1.97	-18.3294	3.67419	4.62463	3.03659	3.09197	1.6624	0.319996	1.51139	-1.072	-0.561906	4.06628		-10.0306
20190807	51.1	19.5384	11.0804	7.62898	3.75298	3.20336	1.63397	0.281516	1.49333	-1.0638	-0.560601	4.0649		38.2478
20190808	12.4	-17.3013	7.73438	8.77258	4.21763	3.25553	1.59632	0.242829	1.47483	-1.0556	-0.559292	4.06351		-0.794352
20190809	5.26	-16.1523	-0.349257	8.25199	4.37547	3.24313	1.54935	0.20399	1.45589	-1.04739	-0.557978	4.06213		-8.24958
20190810	25.3	12.2541	-6.2206	6.50539	4.23884	3.16484	1.4932	0.165053	1.43653	-1.03917	-0.556661	4.06074		12.5389
20190811	6.49	-2.77226	-6.89281	3.99701	3.85244	3.02411	1.42825	0.126072	1.41675	-1.03095	-0.555339	4.05936		-5.66805
20190812	1.66	-5.23327	-5.86139	1.31709	3.26624	2.82744	1.35499	0.0871007	1.39656	-1.02272	-0.554013	4.05797		-9.77757
20190813	3.55	-0.679974	-5.11283	-0.989782	2.52994	2.58228	1.27398	0.0481927	1.37596	-1.01448	-0.552684	4.05659		-6.78258
20190814	3.14	0.791456	-3.98942	-2.62578	1.69267	2.29625	1.18578	0.00940145	1.35496	-1.00624	-0.55135	4.05521		-5.82374
20190815	2.03	0.295947	-2.69506	-3.58445	0.803603	1.97697	1.09096	-0.0292204	1.33356	-0.997985	-0.550012	4.05383		-5.98357
20190816	0.533	-0.368005	-1.47983	-3.94346	-0.0868856	1.63205	0.990133	-0.0676208	1.31178	-0.989727	-0.548669	4.05245		-5.7913
20190817	0.42	-0.613071	-0.226564	-3.82883	-0.928854	1.26912	0.88387	-0.105749	1.28961	-0.981464	-0.547323	4.05107		-4.66847
20190818	2.13	1.2598	0.813334	-3.37425	-1.67557	0.89579	0.772765	-0.143553	1.26707	-0.973194	-0.545973	4.04969		-1.30112
20190819	0.215	-0.60686	1.1183	-2.71432	-2.28521	0.51968	0.657406	-0.180983	1.24416	-0.964919	-0.544618	4.04831		-2.20288
20190820	0.247	-0.0963765	0.899	-1.97612	-2.72602	0.148382	0.538384	-0.217988	1.22089	-0.956639	-0.54326	4.04693		-1.17349
20190821	0.215	-0.181602	0.644768	-1.26988	-2.98027	-0.210788	0.416287	-0.254518	1.19726	-0.948352	-0.541897	4.04555		-0.806714
20190822	0.214	0.329309	0.557573	-0.653367	-3.04737	-0.551384	0.291705	-0.290522	1.17328	-0.940061	-0.540531	4.04417		0.233514
20190823	0.187	-0.0415947	0.484095	-0.139667	-2.94563	-0.868013	0.165226	-0.32595	1.14896	-0.931765	-0.53916	4.04279		0.302833
20190824	0.187	0.0410056	0.309662	0.274894	-2.70409	-1.15629	0.0374419	-0.36075	1.12429	-0.923464	-0.537785	4.04142		0.625561
20190825	0.14	-0.0639964	0.0805435	0.591152	-2.35681	-1.41256	-0.091058	-0.394873	1.0993	-0.915158	-0.536407	4.04004		0.607699
20190826	0.163	0.0326258	-0.0509889	0.814952	-1.942	-1.63384	-0.219683	-0.428267	1.07398	-0.906847	-0.535024	4.03867		0.796589
20190827	0.119	-0.41978	0.0126525	0.962044	-1.49738	-1.81765	-0.347844	-0.460882	1.04834	-0.898533	-0.533637	4.03729		0.554916
20190828	1.31	0.591322	0.114496	1.04152	-1.05428	-1.96205	-0.474959	-0.492668	1.02239	-0.890214	-0.532246	4.03592		1.74734
20190829	0.325	-0.531508	0.0884864	1.0607	-0.639125	-2.06576	-0.60046	-0.523575	0.996133	-0.881891	-0.530851	4.03454		0.617677
20190830	1.38	0.550062	0.126398	1.01517	-0.270273	-2.12847	-0.723806	-0.553551	0.969576	-0.873564	-0.529453	4.03317		1.69163
20190831	0.215	-0.692708	0.152136	0.905227	0.0427097	-2.15133	-0.844477	-0.582546	0.942726	-0.865234	-0.52805	4.0318		0.364655
20190901	1.78	0.42354	0.036767	0.738326	0.299738	-2.13691	-0.961967	-0.61051	0.91559	-0.856901	-0.526643	4.03042		1.19863
20190902	1.31	0.830029	-0.0840957	0.535698	0.50604	-2.08887	-1.07579	-0.637393	0.888173	-0.848564	-0.525232	4.02905		1.28163
20190903	0.14	-0.864744	-0.136177	0.343803	0.668442	-2.01155	-1.18545	-0.663145	0.860483	-0.840224	-0.523818	4.02768		-0.657117
20190904	0.119	-0.52313	-0.0699581	0.200708	0.794137	-1.9098	-1.29049	-0.687717	0.832526	-0.831881	-0.522399	4.02631		-0.39238
20190905	1.38	0.943759	-0.0336395	0.135147	0.889494	-1.78865	-1.39042	-0.711057	0.80431	-0.823535	-0.520977	4.02494		1.04527
20190906	0.163	0.138182	-0.295231	0.161447	0.95912	-1.65309	-1.4848	-0.733118	0.775839	-0.815187	-0.51955	4.02357		0.00439813
20190907	0.084	-0.428615	-0.528547	0.264946	1.00383	-1.50773	-1.57316	-0.753849	0.747123	-0.806837	-0.51812	4.0222		-0.692216
20190908	0.247	-0.702761	-0.192643	0.39778	1.02374	-1.35659	-1.65507	-0.773203	0.718167	-0.798484	-0.516686	4.02083		-0.497624
20190909	2.62	0.833805	0.471159	0.489606	1.01895	-1.20323	-1.73009	-0.79113	0.688978	-0.790129	-0.515247	4.01947		1.79457
20190910	1.85	-0.0700137	0.691035	0.487946	0.991139	-1.05085	-1.79785	-0.807583	0.659564	-0.781773	-0.513805	4.0181		1.10897
20190911	1.85	0.0933979	0.299599	0.380477	0.943739	-0.902279	-1.85801	-0.822515	0.629931	-0.773414	-0.512359	4.01673		0.773474
20190912	0.474	0.0363708	-0.322326	0.19884	0.882304	-0.759975	-1.91028	-0.835882	0.600086	-0.765055	-0.51091	4.01537		-0.0871149
20190913	0.119	-0.0810564	-0.615393	0.00550928	0.813191	-0.626044	-1.95444	-0.847642	0.570038	-0.756694	-0.509456	4.014		-0.69094
20190914	0.1	-0.23049	-0.339719	-0.138795	0.742865	-0.502391	-1.99029	-0.857759	0.539792	-0.748332	-0.507998	4.01263		-0.709004
20190915	0.084	-0.646391	0.240057	-0.203098	0.677378	-0.390611	-2.01769	-0.866203	0.509359	-0.739969	-0.506537	4.01127		-0.609431
20190916	1.46	1.01753	0.486443	-0.184165	0.621529	-0.292075	-2.03653	-0.872948	0.478744	-0.731605	-0.505072	4.00991		1.31981
20190917	0.1	-0.271778	0.0234762	-0.107961	0.578015	-0.207764	-2.04672	-0.877977	0.447956	-0.723241	-0.503603	4.00854		-0.356263
20190918	0.163	-0.254909	-0.503531	-0.00958657	0.545519	-0.138067	-2.04825	-0.881283	0.417004	-0.714876	-0.50213	4.00718		-0.768026
20190919	0.284	0.0213962	-0.343903	0.0772675	0.520992	-0.0826157	-2.04119	-0.88287	0.385897	-0.706511	-0.500654	4.00582		-0.24524
20190920	0.215	-0.45385	0.272769	0.130781	0.50004	-0.0404153	-2.02568	-0.882748	0.354643	-0.698146	-0.499173	4.00446		-0.0503011
20190921	2.19	1.04678	0.612382	0.1339	0.477825	-0.01019	-2.00194	-0.880938	0.323251	-0.689782	-0.497689	4.00309		1.79306
20190922	0.247	-0.850521	0.345379	0.0782058	0.449873	0.00946433	-1.97028	-0.877469	0.29173	-0.681417	-0.496202	4.00173		-0.426936
20190923	0.187	0.100245	-0.130819	-0.0062302	0.413005	0.0200703	-1.93106	-0.872376	0.26009	-0.673053	-0.49471	4.00037		-0.0368043
20190924	0.14	0.0143132	-0.422311	-0.0677062	0.364798	0.0231579	-1.8847	-0.865699	0.228338	-0.66469	-0.493215	3.99901		-0.475704
20190925	0.119	0.0620327	-0.373279	-0.0724966	0.303255	0.0203365	-1.8316	-0.857482	0.196486	-0.656328	-0.491715	3.99765		-0.383743
20190926	0.119	-0.258619	-0.0888572	-0.0192869	0.226795	0.0133089	-1.77223	-0.847772	0.164542	-0.647967	-0.490213	3.9963		-0.366763
20190927	1.23	0.568537	0.109989	0.0558869	0.135706	0.00381138	-1.70705	-0.836621	0.132516	-0.639607	-0.488706	3.99494		0.734413
20190928	0.084	-0.344895	0.0701297	0.108516	0.0304003	-0.00646789	-1.63655	-0.824082	0.100419	-0.631248	-0.487196	3.99358		-0.16625
20190929	0.663	-0.0875439	0.0573106	0.115847	-0.0886434	-0.0158136	-1.56121	-0.81021	0.0682606	-0.622891	-0.485682	3.99222		0.0856134
20190930	0.663	-0.0396619	0.0875065	0.0827425	-0.219211	-0.0225974	-1.48154	-0.795061	0.0360511	-0.614536	-0.484165	3.99087		0.130587
20191001	0.863	0.192095	-0.0440848	0.0377735	-0.358492	-0.0253097	-1.398	-0.778692	0.00380083	-0.606183	-0.482643	3.98951		0.185784
20191002	0.069	-0.265119	-0.167704	0.00747233	-0.504057	-0.0226352	-1.3111	-0.76116	-0.0284798	-0.597832	-0.481118	3.98816		-0.425351
20191003	0.046	-0.140329	-0.0173692	0.0214145	-0.65416	-0.0134975	-1.2213	-0.742521	-0.0607802	-0.589483	-0.47959	3.9868		-0.136283
20191004	0.42	-0.108947	0.210398	0.0815453	-0.808196	0.00294685	-1.12907	-0.722832	-0.0930897	-0.581137	-0.478058	3.98545		0.182997
20191005	1.38	0.500768	0.167418	0.173594	-0.964409	0.0271522	-1.03485	-0.702152	-0.125397	-0.572794	-0.476522	3.98409		0.841781
20191006	0.119	-0.118447	-0.102428	0.274106	-1.11848	0.0593214	-0.939066	-0.680539	-0.157693	-0.564454	-0.474983	3.98274		0.0532308
20191007	0.084	0.0041289	-0.246457	0.349192	-1.26376	0.0992993	-0.842097	-0.65805	-0.189964	-0.556116	-0.47344	3.98139		0.106864
20191008	0.163	-0.227438	-0.0861916	0.36537	-1.39229	0.146721	-0.744285	-0.634744	-0.222201	-0.547782	-0.471893	3.98004		0.0517412
20191009	1.16	0.187958	0.213785	0.309967	-1.49592	0.201087	-0.645937	-0.610681	-0.254392	-0.539452	-0.470343	3.97869		0.71171
20191010	0.863	0.000588696	0.333546	0.194398	-1.56674	0.261714	-0.547332	-0.58592	-0.286526	-0.531125	-0.468789	3.97733		0.528532
20191011	0.187	-0.0860173	0.155639	0.0509268	-1.59557	0.327527	-0.448741	-0.560519	-0.318592	-0.522802	-0.467232	3.97598		0.120548
20191012	0.42	0.0526809	-0.171931	-0.0780651	-1.57275	0.397008	-0.350415	-0.534538	-0.35058	-0.514483	-0.465671	3.97464		-0.197316
20191013	0.214	0.166524	-0.573744	-0.174355	-1.488	0.468385	-0.252585	-0.508037	-0.382477	-0.506168	-0.464106	3.97329		-0.581575
20191014	0.214	0.210293	-0.819236	-0.260321	-1.33247	0.539877	-0.155469	-0.481076	-0.414273	-0.497857	-0.462538	3.97194		-0.869264
20191015	0.247	-0.353197	-0.450877	-0.386245	-1.10111	0.609727	-0.059274	-0.453715	-0.445957	-0.489551	-0.460967	3.97059		-1.19032
20191016	2.08	-0.134427	0.55399	-0.585703	-0.793933	0.676208	0.035798	-0.426014	-0.477517	-0.48125	-0.459392	3.96924		-0.16614
20191017	3.78	0.658561	1.39981	-0.842001	-0.416064	0.737625	0.129538	-0.398034	-0.508942	-0.472953	-0.457814	3.96789		1.21637
20191018	3.33	0.00751977	1.24689	-1.10072	0.0213768	0.792289	0.221722	-0.369834	-0.540221	-0.464662	-0.456232	3.96655		0.153691
20191019	2.9	0.505822	-0.0149621	-1.2689	0.500824	0.838529	0.312112	-0.341476	-0.571343	-0.456376	-0.454646	3.9652		-0.778038
20191020	1.31	-0.435822	-1.5573	-1.23545	1.00104	0.874685	0.400463	-0.31302	-0.602296	-0.448095	-0.453057	3.96386		-3.22857
20191021	1.64	-0.862941	-1.90157	-0.914431	1.4973	0.899098	0.48652	-0.284526	-0.63307	-0.43982	-0.451465	3.96251		-3.67894
20191022	2.11	-3.11656	-0.279929	-0.298805	1.96271	0.910107	0.570026	-0.256053	-0.663653	-0.43155	-0.449869	3.96117		-3.69529
20191023	12.4	4.33194	1.44063	0.46772	2.36969	0.906063	0.650716	-0.22766	-0.694034	-0.423287	-0.44827	3.95982		6.2403
20191024	6.88	-2.29583	1.32238	1.20354	2.6909	0.885333	0.728328	-0.199406	-0.724201	-0.415029	-0.446667	3.95848		0.230098
20191025	5.26	-4.01149	0.512641	1.73017	2.89948	0.846439	0.802607	-0.171351	-0.754143	-0.406778	-0.445061	3.95714		-1.76868
20191026	9.92	0.943891	0.32942	1.9199	2.97168	0.788414	0.873329	-0.143553	-0.78385	-0.398533	-0.443452	3.9558		3.19321
20191027	11.9	2.46	0.619745	1.73363	2.89558	0.711507	0.940323	-0.116072	-0.813308	-0.390295	-0.441839	3.95446		4.81338
20191028	9	0.86092	0.629245	1.20855	2.68054	0.617704	1.00346	-0.0889673	-0.842507	-0.382064	-0.440223	3.95312		2.69871
20191029	5.74	-0.399549	0.108374	0.478265	2.34756	0.509844	1.06264	-0.0622978	-0.871436	-0.37384	-0.438603	3.95177		0.187091
20191030	4.61	-0.31146	-0.42918	-0.293579	1.92138	0.390885	1.1178	-0.0361225	-0.900082	-0.365622	-0.43698	3.95043		-1.03422
20191031	4.04	0.729132	-0.664958	-0.958623	1.42715	0.263765	1.16892	-0.0104997	-0.928434	-0.357413	-0.435354	3.9491		-0.894449
20191101	1.91	-0.565248	-0.705387	-1.40272	0.88933	0.131409	1.21597	0.0145133	-0.956482	-0.34921	-0.433724	3.94776		-2.67336
20191102	1.46	-0.0675596	-0.448907	-1.56957	0.330656	-0.00327453	1.25895	0.0388598	-0.984212	-0.341015	-0.432091	3.94642		-2.08603
20191103	1.38	-0.499415	0.102151	-1.468	-0.228888	-0.137373	1.29786	0.0624845	-1.01162	-0.332829	-0.430455	3.94508		-1.86527
20191104	2.75	1.17912	0.360251	-1.15528	-0.771885	-0.26792	1.33272	0.0853326	-1.03868	-0.32465	-0.428816	3.94374		0.384092
20191105	0.937	-0.431103	0.144449	-0.722793	-1.28341	-0.391896	1.36355	0.10735	-1.06539	-0.316479	-0.427173	3.94241		-1.00945
20191106	0.937	-0.347234	0.0099972	-0.261722	-1.74929	-0.50621	1.39039	0.128486	-1.09174	-0.308316	-0.425527	3.94107		-0.598959
20191107	1.16	0.0176427	0.175191	0.159055	-2.1565	-0.607673	1.41328	0.148688	-1.11772	-0.300162	-0.423878	3.93974		0.351888
20191108	1.09	-0.128453	0.271404	0.498184	-2.49513	-0.693054	1.43227	0.167908	-1.14331	-0.292017	-0.422225	3.9384		0.641136
20191109	1.64	0.677083	-0.0181939	0.747686	-2.75926	-0.759192	1.44741	0.186099	-1.16851	-0.283881	-0.420569	3.93707		1.40658
20191110	0.163	-0.455253	-0.393944	0.918533	-2.94556	-0.803212	1.45877	0.203215	-1.19331	-0.275753	-0.418911	3.93573		0.0693358
20191111	0.187	-0.487452	-0.308454	1.03197	-3.05079	-0.822752	1.46639	0.219212	-1.21769	-0.267634	-0.417248	3.9344		0.236064
20191112	2.19	1.22262	0.0466944	1.07784	-3.06787	-0.816496	1.47035	0.23405	-1.24164	-0.259525	-0.415583	3.93307		2.34715
20191113	1.01	-0.403742	0.199646	1.01078	-2.98625	-0.784779	1.4707	0.24769	-1.26515	-0.251425	-0.413914	3.93174		0.806689
20191114	0.937	-0.277327	0.139361	0.763956	-2.79706	-0.729339	1.46747	0.260096	-1.28822	-0.243334	-0.412243	3.9304		0.625991
20191115	1.01	0.0791135	0.131942	0.297643	-2.49725	-0.652874	1.46071	0.271239	-1.31084	-0.235254	-0.410568	3.92907		0.508699
20191116	1.01	0.0204179	0.328222	-0.377618	-2.09195	-0.558683	1.45048	0.281091	-1.33299	-0.227182	-0.40889	3.92774		-0.0289778
20191117	0.937	-0.154025	0.721014	-1.18237	-1.5925	-0.450374	1.43682	0.289632	-1.35467	-0.219121	-0.407209	3.92641		-0.615379
20191118	1.16	-0.274882	1.12715	-1.95093	-1.01618	-0.331631	1.41983	0.296842	-1.37587	-0.21107	-0.405525	3.92508		-1.09867
20191119	2.49	1.06714	0.924104	-2.43757	-0.38679	-0.206083	1.39957	0.30271	-1.39658	-0.203029	-0.403837	3.92376		-0.446324
20191120	1.01	0.18557	-0.524449	-2.42482	0.268132	-0.0772554	1.37612	0.307225	-1.4168	-0.194999	-0.402147	3.92243		-2.76369
20191121	0.596	0.777589	-2.62571	-1.82303	0.917183	0.0514158	1.34955	0.31038	-1.43651	-0.186979	-0.400454	3.9211		-3.67115
20191122	0.533	-0.344177	-3.544	-0.679138	1.52423	0.176543	1.31995	0.312173	-1.45572	-0.178969	-0.398757	3.91977		-4.56732
20191123	0.596	-4.29399	-1.88582	0.800827	2.05045	0.294751	1.28737	0.312607	-1.47442	-0.17097	-0.397058	3.91845		-5.37898
20191124	9.348	-0.732911	1.62509	2.2114	2.45606	0.402674	1.25188	0.311686	-1.49261	-0.162982	-0.395355	3.91712		3.10358
20191125	18.1	4.72978	3.95036	3.08996	2.70155	0.496985	1.21354	0.309418	-1.51028	-0.155006	-0.39365	3.91579		11.7701
20191126	9.92	-2.6106	2.69724	3.08821	2.75646	0.574749	1.1724	0.305813	-1.52742	-0.14704	-0.391941	3.91447		3.17484
20191127	6.49	-2.19253	-0.217514	2.34411	2.6266	0.634356	1.12854	0.300882	-1.54404	-0.139086	-0.390229	3.91314		-0.0659338
20191128	4.93	-0.49059	-2.09679	1.15419	2.34703	0.67586	1.08206	0.294641	-1.56013	-0.131143	-0.388515	3.91182		-1.43318
20191129	3.55	0.168676	-2.0102	-0.167872	1.95905	0.700141	1.0331	0.287109	-1.5757	-0.123211	-0.386798	3.9105		-2.00939
20191130	3.55	0.477303	-1.01156	-1.32019	1.5045	0.708251	0.981826	0.278304	-1.59073	-0.115292	-0.385077	3.90917		-1.85445
20191201	2.96	0.200214	-0.184657	-2.09	1.02544	0.701221	0.92843	0.268248	-1.60523	-0.107384	-0.383354	3.90785		-2.07444
20191202	2.28	0.0859861	0.235296	-2.40796	0.563602	0.680047	0.87314	0.256963	-1.61919	-0.0994881	-0.381628	3.90653		-2.08668
20191203	1.46	-0.372218	0.45231	-2.3643	0.157562	0.645705	0.816198	0.244471	-1.63262	-0.0916045	-0.379899	3.90521		-2.28421
20191204	1.46	-0.423916	0.684489	-2.07131	-0.163194	0.599137	0.757853	0.230796	-1.64551	-0.0837332	-0.378167	3.90389		-1.81074
20191205	3.33	1.37371	0.483118	-1.54385	-0.390874	0.541251	0.698353	0.215963	-1.65787	-0.0758744	-0.376432	3.90257		0.312979
20191206	0.215	-1.23852	-0.561221	-0.786292	-0.536749	0.473297	0.637944	0.199994	-1.66969	-0.0680281	-0.374694	3.90125		-2.58603
20191207	2.08	0.878274	-1.4922	0.119166	-0.62048	0.396867	0.576873	0.182917	-1.68097	-0.0601946	-0.372954	3.89993		-0.494764
20191208	1.46	-0.648272	-0.827589	1.02328	-0.660298	0.313775	0.515386	0.164755	-1.69172	-0.0523738	-0.37121	3.89861		-0.452578
20191209	2.13	-2.86065	1.13468	1.70363	-0.669221	0.22594	0.453728	0.145535	-1.70192	-0.044566	-0.369464	3.89729		-0.0223375
20191210	9.46	3.82762	2.02367	1.93292	-0.659848	0.135392	0.392142	0.125283	-1.71159	-0.0367713	-0.367715	3.89598		7.78421
20191211	0.187	-3.54305	0.310124	1.6155	-0.645304	0.0442228	0.33087	0.104025	-1.72072	-0.0289898	-0.365963	3.89466		-1.61742
20191212	1.97	0.860912	-1.23739	0.947718	-0.630589	-0.0456813	0.270154	0.0817877	-1.72932	-0.0212215	-0.364209	3.89334		0.571243
20191213	2.08	1.58508	-1.14636	0.200201	-0.616544	-0.132613	0.210234	0.0585977	-1.73738	-0.0134667	-0.362452	3.89203		0.638922
20191214	0.14	-0.294195	-0.407472	-0.393684	-0.603519	-0.214857	0.151354	0.0344821	-1.74491	-0.00572543	-0.360692	3.89071		-1.09535
20191215	0.14	-0.303053	0.0225033	-0.710619	-0.591746	-0.290747	0.0937516	0.00946795	-1.7519	0.00200221	-0.358929	3.8894		-0.991169
20191216	0.163	-0.217975	0.27337	-0.746416	-0.579898	-0.358867	0.037668	-0.0164176	-1.75836	0.0097161	-0.357164	3.88809		-0.69102
20191217	1.38	0.4756	0.384417	-0.572153	-0.564029	-0.418067	-0.0166696	-0.0431478	-1.7643	0.0174161	-0.355396	3.88677		0.287864
20191218	0.187	-0.32514	0.232273	-0.306917	-0.5404	-0.467351	-0.0690491	-0.0706965	-1.7697	0.0251023	-0.353625	3.88546		-0.399784
20191219	0.284	0.0907972	-0.00383104	-0.056177	-0.506757	-0.505892	-0.119264	-0.0990384	-1.77457	0.0327743	-0.351851	3.88415		0.0307891
20191220	0.325	0.0631429	-0.102371	0.11166	-0.464045	-0.533248	-0.167125	-0.128148	-1.77892	0.0404322	-0.350075	3.88284		0.0724327
20191221	0.325	-0.56513	-0.0273544	0.185455	-0.415838	-0.549413	-0.212471	-0.158001	-1.78275	0.0480759	-0.348297	3.88152		-0.407029
20191222	1.71	0.786549	0.141326	0.186969	-0.366281	-0.554586	-0.255164	-0.188572	-1.78605	0.0557052	-0.346515	3.88021		1.11484
20191223	0.284	-0.389763	0.120504	0.15282	-0.319224	-0.549147	-0.295095	-0.219834	-1.78884	0.0633201	-0.344732	3.8789		-0.116439
20191224	0.215	-0.098278	-0.0673875	0.112511	-0.276777	-0.533642	-0.332172	-0.251763	-1.79111	0.0709205	-0.342945	3.87759		-0.0531543
20191225	0.247	0.209593	-0.202368	0.0743674	-0.240073	-0.508772	-0.36632	-0.284331	-1.79286	0.0785063	-0.341156	3.87628		0.0815926
20191226	0.215	-0.262529	-0.154287	0.0382731	-0.209055	-0.4754	-0.397474	-0.317512	-1.79409	0.0860773	-0.339364	3.87498		-0.378544
20191227	0.214	-0.00718106	0.037187	0.000115463	-0.182494	-0.434567	-0.425592	-0.351281	-1.79482	0.0936336	-0.33757	3.87367		0.0301214
20191228	0.187	-0.654215	0.195911	-0.0447596	-0.158723	-0.387472	-0.450663	-0.385608	-1.79504	0.101175	-0.335774	3.87236		-0.503064
20191229	1.64	0.909729	0.23652	-0.10863	-0.135013	-0.335392	-0.472698	-0.420465	-1.79474	0.108701	-0.333975	3.87105		1.03762
20191230	0.163	-0.363399	0.127692	-0.189412	-0.108491	-0.279583	-0.491721	-0.455824	-1.79395	0.116212	-0.332173	3.86975		-0.425119
20191231	0.14	0.17527	-0.078604	-0.264338	-0.0771422	-0.221308	-0.507774	-0.491655	-1.79264	0.123708	-0.330369	3.86844		-0.167672
20200101	0.14	-0.433034	-0.115678	-0.312711	-0.039479	-0.161895	-0.52092	-0.527929	-1.79084	0.131189	-0.328562	3.86714		-0.861423
20200102	0.163	-0.188515	0.0709834	-0.314875	0.0050124	-0.102651	-0.531238	-0.564614	-1.78854	0.138655	-0.326754	3.86583		-0.432407
20200103	1.09	0.560931	0.0493172	-0.251646	0.0553974	-0.0448448	-0.53882	-0.601681	-1.78574	0.146105	-0.324942	3.86453		0.358603
20200104	0.163	-0.169942	-0.343839	-0.120582	0.109142	0.0103729	-0.543767	-0.639098	-1.78244	0.153539	-0.323128	3.86322		-0.634363
20200105	0.119	-0.453708	-0.670556	0.0562865	0.162311	0.0619529	-0.546185	-0.676835	-1.77865	0.160958	-0.321312	3.86192		-1.06798
20200106	0.187	-0.412138	-0.31808	0.248042	0.210043	0.108973	-0.546173	-0.714861	-1.77436	0.168361	-0.319494	3.86062		-0.482176
20200107	2.75	1.01347	0.500425	0.405672	0.247353	0.150579	-0.543841	-0.753145	-1.76959	0.175749	-0.317673	3.85932		1.91956
20200108	2	-0.428264	0.904092	0.472365	0.270343	0.186019	-0.539306	-0.791654	-1.76432	0.183121	-0.31585	3.85802		0.948192
20200109	2.05	0.130542	0.605918	0.422094	0.277093	0.214638	-0.532686	-0.830355	-1.75857	0.190477	-0.314024	3.85672		1.15855
20200110	0.789	-0.452056	0.118266	0.268254	0.267403	0.23605	-0.524109	-0.869214	-1.75232	0.197818	-0.312197	3.85542		-0.0655361
20200111	1.46	0.51604	-0.205679	0.0685246	0.242773	0.250276	-0.513718	-0.908198	-1.74559	0.205142	-0.310367	3.85412		0.378886
20200112	0.42	0.00227652	-0.442615	-0.103612	0.207239	0.257613	-0.501676	-0.947271	-1.73838	0.212451	-0.308534	3.85282		-0.54395
20200113	0.42	-0.0449396	-0.546401	-0.206209	0.164874	0.258539	-0.48816	-0.986396	-1.73068	0.219743	-0.3067	3.85152		-0.79755
20200114	0.37	-0.110019	-0.308967	-0.236639	0.119895	0.253662	-0.473349	-1.02554	-1.7225	0.22702	-0.304863	3.85022		-0.655626
20200115	0.325	-0.257677	0.159912	-0.213854	0.0765574	0.243646	-0.457419	-1.06466	-1.71383	0.234281	-0.303024	3.84892		-0.311619
20200116	1.71	0.818606	0.413125	-0.166038	0.0379292	0.2292	-0.440537	-1.10373	-1.70468	0.241525	-0.301183	3.84763		1.06569
20200117	0.215	-0.906702	0.329972	-0.117366	0.0053809	0.210997	-0.422848	-1.1427	-1.69506	0.248753	-0.29934	3.84633		-0.694095
20200118	1.46	0.596704	0.138149	-0.0736212	-0.0205528	0.189677	-0.404481	-1.18154	-1.68495	0.255965	-0.297495	3.84503		0.661232
20200119	0.187	-0.194629	-0.103026	-0.0297386	-0.039584	0.165899	-0.385555	-1.22021	-1.67436	0.263161	-0.295647	3.84374		-0.327394
20200120	0.14	0.0555131	-0.366551	0.0229881	-0.0512638	0.140366	-0.366194	-1.25868	-1.66329	0.27034	-0.293798	3.84244		-0.28805
20200121	0.187	0.0380534	-0.367572	0.0754506	-0.0561112	0.113831	-0.34653	-1.29689	-1.65175	0.277503	-0.291946	3.84115		-0.254068
20200122	0.187	-0.48154	0.00685307	0.109626	-0.0552466	0.0870603	-0.326701	-1.33482	-1.63972	0.28465	-0.290092	3.83986		-0.365061
20200123	1.78	0.964494	0.318697	0.104919	-0.050492	0.0608344	-0.306839	-1.37243	-1.62722	0.291781	-0.288236	3.83856		1.38811
20200124	0.214	-0.621933	0.220644	0.0454482	-0.0442314	0.0359099	-0.28707	-1.40968	-1.61425	0.298895	-0.286379	3.83727		-0.355841
20200125	0.42	0.0517391	0.0025	-0.0455026	-0.0381295	0.0130299	-0.267517	-1.44654	-1.6008	0.305992	-0.284519	3.83598		0.00873651
20200126	0.187	0.212767	-0.0624957	-0.127836	-0.0334762	-0.00710834	-0.248293	-1.48296	-1.58687	0.313073	-0.282657	3.83469		0.0224352
20200127	0.215	-0.119489	-0.024188	-0.170245	-0.0310311	-0.0238796	-0.229503	-1.51892	-1.57247	0.320138	-0.280793	3.83339		-0.313922
20200128	0.214	0.2275	-0.10013	-0.155555	-0.0311222	-0.0368633	-0.211245	-1.55439	-1.5576	0.327185	-0.278928	3.8321		-0.0281856
20200129	0.187	-0.102871	-0.265919	-0.0872834	-0.0332249	-0.0458106	-0.193606	-1.58932	-1.54226	0.334217	-0.27706	3.83081		-0.456074
20200130	0.187	-0.0435447	-0.232836	0.0226887	-0.0370813	-0.0505622	-0.176663	-1.6237	-1.52644	0.341231	-0.275191	3.82953		-0.253692
20200131	0.163	-0.341941	0.123716	0.136237	-0.0424468	-0.0510677	-0.160489	-1.65748	-1.51016	0.348229	-0.273319	3.82824		-0.081988
20200201	1.57	0.331126	0.449095	0.20869	-0.0488539	-0.0473734	-0.145153	-1.69065	-1.4934	0.355211	-0.271446	3.82695		0.988911
20200202	1.46	0.246331	0.389558	0.204762	-0.0553557	-0.0396512	-0.130708	-1.72316	-1.47617	0.362175	-0.269571	3.82566		0.840651
20200203	0.187	-0.194142	0.078696	0.131357	-0.0613117	-0.0281641	-0.117185	-1.755	-1.45848	0.369123	-0.267694	3.82437		0.0159115
20200204	0.187	-0.0177107	-0.201644	0.024344	-0.0657989	-0.0132352	-0.104602	-1.78614	-1.44032	0.376054	-0.265815	3.82309		-0.195011
20200205	0.187	0.0032548	-0.408766	-0.067479	-0.0675038	0.00480658	-0.0929676	-1.81654	-1.4217	0.382968	-0.263935	3.8218		-0.47299
20200206	0.163	0.133887	-0.428281	-0.108343	-0.0646185	0.0255695	-0.0822853	-1.8462	-1.4026	0.389866	-0.262052	3.82052		-0.402737
20200207	0.215	-0.229467	-0.134901	-0.115783	-0.055848	0.0485508	-0.0725614	-1.87507	-1.38305	0.396746	-0.260168	3.81923		-0.480151
20200208	0.247	-0.679757	0.342343	-0.122946	-0.0395907	0.0731196	-0.063801	-1.90315	-1.36303	0.40361	-0.258282	3.81795		-0.46036
20200209	1.71	0.351384	0.731486	-0.163502	-0.0150479	0.0985729	-0.0559999	-1.9304	-1.34255	0.410456	-0.256395	3.81666		0.919369
20200210	1.31	0.142464	0.761829	-0.249844	0.017758	0.124152	-0.0491384	-1.95681	-1.32161	0.417286	-0.254506	3.81538		0.65445
20200211	0.214	-0.489022	0.196703	-0.339852	0.0573518	0.149067	-0.043188	-1.98236	-1.30021	0.424098	-0.252615	3.8141		-0.632171
20200212	0.187	0.164728	-0.624721	-0.369611	0.100127	0.172633	-0.0381069	-2.00702	-1.27835	0.430894	-0.250722	3.81281		-0.829604
20200213	0.187	0.339715	-0.977154	-0.290597	0.141304	0.194256	-0.0338469	-2.03077	-1.25604	0.437672	-0.248828	3.81153		-0.928036
20200214	0.214	-0.400179	-0.537841	-0.0951948	0.175605	0.213381	-0.0303637	-2.0536	-1.23327	0.444434	-0.246932	3.81025		-1.03322
20200215	1.71	0.0389882	0.307422	0.167451	0.197935	0.229479	-0.0276031	-2.07549	-1.21006	0.451178	-0.245035	3.80897		0.513861
20200216	3.33	0.780939	0.781991	0.421975	0.204309	0.242059	-0.0255033	-2.0964	-1.1864	0.457905	-0.243136	3.80769		1.98491
20200217	2.38	-0.00335905	0.609617	0.599324	0.191491	0.250727	-0.0239871	-2.11633	-1.1623	0.464615	-0.241235	3.80641		1.20558
20200218	1.91	-0.642011	0.161548	0.663348	0.157245	0.255231	-0.0229632	-2.13524	-1.13776	0.471307	-0.239333	3.80513		0.182885
20200219	1.97	0.308133	-0.275158	0.61275	0.102297	0.255381	-0.0223371	-2.15313	-1.11279	0.477983	-0.237429	3.80385		0.645725
20200220	1.64	0.517659	-0.529925	0.468278	0.0309193	0.250999	-0.0220099	-2.16996	-1.08738	0.484641	-0.235524	3.80258		0.456012
20200221	0.325	-0.562004	-0.405723	0.262152	-0.0503039	0.241925	-0.0218904	-2.18573	-1.06154	0.491281	-0.233617	3.8013		-0.705576
20200222	0.325	-0.113395	0.00296214	0.0334612	-0.133329	0.228052	-0.0218963	-2.20041	-1.03528	0.497905	-0.231709	3.80002		-0.0769717
20200223	1.71	0.997228	0.281199	-0.181609	-0.208928	0.209354	-0.021952	-2.21397	-1.00861	0.504511	-0.229799	3.79875		1.09682
20200224	0.37	-0.609241	0.163169	-0.35424	-0.267805	0.185905	-0.0219891	-2.22641	-0.981511	0.5111	-0.227888	3.79747		-0.800312
20200225	0.37	-0.379162	-0.0466226	-0.471672	-0.300865	0.157852	-0.0219444	-2.23771	-0.954006	0.517671	-0.225976	3.7962		-0.897457
20200226	0.215	0.324138	-0.0819398	-0.524367	-0.299725	0.125331	-0.0217515	-2.24783	-0.926095	0.524225	-0.224062	3.79492		-0.282169
20200227	0.214	-0.105559	-0.0107221	-0.498883	-0.258171	0.088565	-0.0213496	-2.25677	-0.897784	0.530761	-0.222147	3.79365		-0.615164
20200228	0.284	-0.32129	0.0435073	-0.391412	-0.175332	0.0480163	-0.0206924	-2.2645	-0.869078	0.53728	-0.22023	3.79237		-0.669195
20200229	1.71	1.00816	-0.0115468	-0.221912	-0.0561209	0.00443094	-0.0197358	-2.27099	-0.839983	0.543782	-0.218312	3.7911		0.774702
20200301	0.42	-0.47307	-0.211565	-0.0133095	0.0899525	-0.0413392	-0.018437	-2.27623	-0.810504	0.550266	-0.216393	3.78983		-0.697944
20200302	0.474	-1.09817	-0.168609	0.18891	0.249915	-0.0883659	-0.0167663	-2.2802	-0.780649	0.556733	-0.214472	3.78856		-1.07787
20200303	2.9	0.918934	0.275399	0.327178	0.409027	-0.135634	-0.0147047	-2.28287	-0.750425	0.563182	-0.21255	3.78729		1.52151
20200304	2.38	0.258604	0.52125	0.372262	0.552063	-0.181992	-0.0122388	-2.28422	-0.719839	0.569614	-0.210627	3.78601		1.15212
20200305	2.05	-0.43513	0.293902	0.317614	0.665319	-0.226118	-0.00936334	-2.28422	-0.688898	0.576028	-0.208703	3.78474		0.176386
20200306	2	0.183056	-0.0393169	0.175241	0.737005	-0.26656	-0.00608288	-2.28287	-0.657611	0.582424	-0.206777	3.78347		0.31898
20200307	1.85	0.29258	-0.202305	-0.00950176	0.756516	-0.301878	-0.00242104	-2.28012	-0.625986	0.588804	-0.20485	3.78221		0.0807733
20200308	1.31	0.180736	-0.334216	-0.167774	0.715211	-0.330746	0.0015718	-2.27596	-0.594031	0.595165	-0.202922	3.78094		-0.321255
20200309	0.42	-0.10169	-0.449088	-0.240723	0.607007	-0.35207	0.00582752	-2.27036	-0.561757	0.601509	-0.200993	3.77967		-0.791501
20200310	0.474	-0.644677	-0.265896	-0.210082	0.42853	-0.365216	0.010276	-2.2633	-0.529171	0.607836	-0.199063	3.7784		-1.12065
20200311	1.85	0.853764	0.205362	-0.0907649	0.180746	-0.370001	0.0148413	-2.25475	-0.496284	0.614145	-0.197131	3.77713		0.968361
20200312	1.71	0.0422392	0.505138	0.0873334	-0.128541	-0.366569	0.0194334	-2.24469	-0.463103	0.620436	-0.195198	3.77587		0.634711
20200313	1.38	-0.206695	0.299174	0.299076	-0.484259	-0.355507	0.0239576	-2.23307	-0.429638	0.62671	-0.193265	3.7746		0.391556
20200314	0.284	-0.204473	-0.207631	0.525501	-0.864641	-0.337594	0.0283252	-2.21987	-0.395899	0.632966	-0.19133	3.77334		0.113397
20200315	0.247	-0.117052	-0.493173	0.753567	-1.24153	-0.31383	0.0324256	-2.20507	-0.361895	0.639205	-0.189394	3.77207		0.143342
20200316	0.247	-0.147625	-0.232032	0.936281	-1.58084	-0.285566	0.0360813	-2.18862	-0.327636	0.645426	-0.187457	3.77081		0.556624
20200317	0.214	-0.360988	0.185725	0.987435	-1.84409	-0.254466	0.0390672	-2.1705	-0.293131	0.65163	-0.185519	3.76954		0.812172
20200318	1.57	1.02503	0.290556	0.818798	-1.99236	-0.222016	0.0411275	-2.15067	-0.258389	0.657816	-0.18358	3.76828		2.13439
20200319	0.214	-0.371006	0.20532	0.353196	-1.99158	-0.189331	0.0419816	-2.12912	-0.223422	0.663984	-0.18164	3.76702		0.187511
20200320	0.214	-0.229956	0.472798	-0.438551	-1.82184	-0.156774	0.041324	-2.10581	-0.188239	0.670135	-0.179699	3.76576		-0.195709
20200321	0.163	0.120226	1.0577	-1.40177	-1.47612	-0.124154	0.0388383	-2.08071	-0.152851	0.676268	-0.177757	3.7645		-0.22384
20200322	0.215	-0.00296851	1.16688	-2.23546	-0.960632	-0.0909025	0.0342064	-2.05382	-0.117267	0.682383	-0.175814	3.76323		-1.07154
20200323	0.187	0.468267	0.298728	-2.62631	-0.294334	-0.0560573	0.0271126	-2.0251	-0.0814994	0.688481	-0.17387	3.76197		-1.85932
20200324	0.163	1.20656	-1.72105	-2.34867	0.486342	-0.0186123	0.0172457	-1.99456	-0.0455575	0.694561	-0.171926	3.76071		-2.86317
20200325	0.789	2.24124	-3.95281	-1.33503	1.31746	0.0224052	0.00430069	-1.96216	-0.00945215	0.700623	-0.16998	3.75946		-3.04659
20200326	0.163	-0.712503	-3.63342	0.238984	2.11709	0.0679677	-0.012031	-1.92792	0.0268059	0.706668	-0.168034	3.7582		-4.10694
20200327	0.325	-7.50557	0.556458	1.91873	2.79733	0.119017	-0.0320376	-1.89182	0.063206	0.712695	-0.166086	3.75694		-5.03038
20200328	21.8	7.92745	5.2026	3.08546	3.2697	0.17641	-0.0559646	-1.85385	0.0997372	0.718704	-0.164138	3.75568		16.2155
20200329	7.7	-6.02808	4.26527	3.22578	3.45337	0.240901	-0.084006	-1.81402	0.136389	0.724696	-0.162189	3.75442		1.46298
20200330	4.32	-4.45531	0.167204	2.41087	3.3109	0.313163	-0.116312	-1.77234	0.173149	0.73067	-0.16024	3.75317		-1.87723
20200331	2.9	-1.41171	-2.72903	1.04547	2.87168	0.393678	-0.152974	-1.7288	0.210008	0.736626	-0.158289	3.75191		-3.09528
20200401	2.28	0.604467	-2.98593	-0.418808	2.18662	0.48274	-0.194043	-1.68342	0.246953	0.742564	-0.156338	3.75066		-2.80027
20200402	2.11	0.503254	-1.55291	-1.57743	1.30893	0.580516	-0.239552	-1.63621	0.283974	0.748485	-0.154386	3.7494		-2.62708
20200403	2.05	0.258174	-0.018216	-2.16097	0.293476	0.687155	-0.289512	-1.5872	0.321059	0.754388	-0.152434	3.74815		-1.92102
20200404	1.85	0.551113	0.681488	-2.06859	-0.795512	0.802805	-0.343925	-1.5364	0.358198	0.760273	-0.15048	3.74689		-0.835988
20200405	0.596	-0.352717	0.617743	-1.43184	-1.8734	0.927597	-0.402758	-1.48383	0.395377	0.76614	-0.148526	3.74564		-1.16681
20200406	0.474	-0.74608	0.369121	-0.540159	-2.8399	1.06163	-0.465924	-1.42953	0.432587	0.77199	-0.146572	3.74439		-0.917118
20200407	1.91	1.31181	0.0736074	0.26029	-3.59249	1.20494	-0.533273	-1.37352	0.469816	0.777822	-0.144616	3.74313		1.6457
20200408	0.325	-0.516693	-0.296031	0.644716	-4.03952	1.35739	-0.604584	-1.31583	0.507052	0.783636	-0.142661	3.74188		-0.168008
20200409	0.37	-0.512322	-0.0151098	0.412403	-4.1283	1.51848	-0.679596	-1.25651	0.544285	0.789432	-0.140704	3.74063		-0.115028
20200410	1.91	0.197258	1.26679	-0.410849	-3.85624	1.6858	-0.758018	-1.19559	0.581502	0.79521	-0.138747	3.73938		1.0532
20200411	3.36	0.682201	2.61618	-1.55126	-3.26462	1.8542	-0.839527	-1.13311	0.618692	0.800971	-0.13679	3.73813		1.74712
20200412	3.14	0.418859	2.69796	-2.63565	-2.41433	2.01781	-0.923792	-1.06912	0.655845	0.806714	-0.134831	3.73688		0.48117
20200413	2.49	0.7143	0.781692	-3.2616	-1.37841	2.17077	-1.01048	-1.00368	0.692947	0.812439	-0.132873	3.73563		-1.76561
20200414	2.19	2.99417	-2.84652	-3.11215	-0.238477	2.30725	-1.09927	-0.936845	0.729989	0.818146	-0.130914	3.73438		-2.96451
20200415	1.85	3.12107	-5.81694	-2.03703	0.918284	2.4214	-1.18982	-0.868665	0.766958	0.823835	-0.128954	3.73314		-4.7329
20200416	0.325	-2.08021	-4.89413	-0.133267	2.00167	2.5074	-1.2818	-0.799203	0.803843	0.829506	-0.126994	3.73189		-7.10761
20200417	0.247	-10.9632	0.712219	2.04185	2.92085	2.55943	-1.37485	-0.72852	0.840632	0.83516	-0.125034	3.73064		-8.20914
20200418	30.8	11.3165	6.74468	3.69539	3.58499	2.57173	-1.46864	-0.656677	0.877314	0.840796	-0.123073	3.7294		21.7566
20200419	10.9	-9.31507	5.96898	4.15642	3.91086	2.53882	-1.56282	-0.583734	0.913877	0.846413	-0.121111	3.72815		0.810327
20200420	7.7	-6.48571	0.899941	3.43761	3.86358	2.45725	-1.65704	-0.509754	0.95031	0.852013	-0.11915	3.72691		-2.14816
20200421	9	1.65773	-3.51021	1.9371	3.49394	2.3278	-1.7509	-0.434797	0.9866	0.857596	-0.117188	3.72566		0.0846198
20200422	6.49	1.53715	-3.84352	0.11367	2.87947	2.15421	-1.84398	-0.358924	1.02274	0.86316	-0.115225	3.72442		-2.1927
20200423	4.32	0.469898	-1.89692	-1.53307	2.10024	1.94103	-1.93586	-0.282195	1.05871	0.868706	-0.113262	3.72317		-2.96009
20200424	3.55	0.0238319	-0.189496	-2.57182	1.2358	1.69298	-2.02609	-0.204671	1.0945	0.874235	-0.111299	3.72193		-2.73749
20200425	2.75	0.256504	0.574902	-2.85942	0.362449	1.41478	-2.11425	-0.126412	1.1301	0.879745	-0.109336	3.72069		-2.02802
20200426	2.19	-0.146856	0.746022	-2.54807	-0.449723	1.11118	-2.19989	-0.0474791	1.1655	0.885238	-0.107373	3.71945		-1.9489
20200427	2.08	0.106545	0.686118	-1.9356	-1.1425	0.786934	-2.28255	0.0320681	1.20069	0.890713	-0.105409	3.71821		-1.14293
20200428	1.91	0.317456	0.333755	-1.25046	-1.67631	0.446891	-2.3618	0.11217	1.23566	0.89617	-0.103445	3.71696		-0.599249
20200429	0.789	-0.231733	-0.153902	-0.633987	-2.03112	0.0960356	-2.43718	0.192768	1.27038	0.901609	-0.10148	3.71572		-1.01962
20200430	0.42	-0.407292	-0.254857	-0.191812	-2.20033	-0.26059	-2.50825	0.273805	1.30486	0.90703	-0.0995161	3.71448		-0.85396
20200501	0.474	-0.0820755	0.155142	0.0217167	-2.18863	-0.618064	-2.57455	0.355223	1.33907	0.912433	-0.0975515	3.71325		0.0947829
20200502	1.91	0.98195	0.549502	0.0259976	-2.01727	-0.971637	-2.63565	0.436966	1.37301	0.917818	-0.0955867	3.71201		1.55745
20200503	0.284	-0.672404	0.502155	-0.0955316	-1.72376	-1.31678	-2.6911	0.518978	1.40666	0.923185	-0.0936219	3.71077		-0.26578
20200504	0.215	-0.666224	0.117457	-0.220795	-1.35452	-1.64919	-2.74044	0.601205	1.44002	0.928535	-0.0916569	3.70953		-0.769561
20200505	1.31	1.07422	-0.438067	-0.229057	-0.955772	-1.96478	-2.78324	0.683594	1.47307	0.933866	-0.0896918	3.70829		0.407098
20200506	0.247	-0.14727	-0.948465	-0.0479282	-0.568324	-2.25972	-2.81906	0.766091	1.50579	0.93918	-0.0877267	3.70706		-1.14366
20200507	0.187	-1.01337	-0.812404	0.308479	-0.223291	-2.53044	-2.84742	0.848643	1.53818	0.944476	-0.0857615	3.70582		-1.5173
20200508	1.38	-1.17802	0.37214	0.743073	0.0575349	-2.7736	-2.86789	0.931198	1.57022	0.949754	-0.0837963	3.70459		-0.0628034
20200509	6.49	2.42432	1.45696	1.12461	0.257777	-2.9861	-2.88001	1.0137	1.60191	0.955014	-0.0818311	3.70335		5.00589
20200510	3.78	-0.248178	1.15598	1.33883	0.365836	-3.16544	-2.88332	1.0961	1.63322	0.960255	-0.0798659	3.70212		2.24664
20200511	2	-1.33257	0.0573503	1.35836	0.380957	-3.31054	-2.87738	1.17835	1.66416	0.96548	-0.0779007	3.70088		0.0831332
20200512	2	0.234934	-0.780966	1.22416	0.312451	-3.42212	-2.86181	1.26039	1.6947	0.970686	-0.0759356	3.69965		0.678131
20200513	2.08	0.67142	-0.950772	0.990223	0.176596	-3.50237	-2.83625	1.34219	1.72483	0.975874	-0.0739705	3.69842		0.71087
20200514	0.663	-0.893053	-0.497122	0.698095	-0.00425142	-3.55427	-2.80047	1.42368	1.75454	0.981044	-0.0720055	3.69719		-0.692079
20200515	2.28	0.379669	0.219415	0.371313	-0.203904	-3.5812	-2.75426	1.50481	1.78383	0.986196	-0.0700406	3.69595		0.970397
20200516	1.85	0.234023	0.560271	0.017495	-0.39327	-3.58677	-2.69748	1.58554	1.81267	0.991331	-0.0680759	3.69472		0.811789
20200517	1.46	0.160615	0.301284	-0.35541	-0.542391	-3.57466	-2.63002	1.66581	1.84105	0.996447	-0.0661112	3.69349		0.10649
20200518	0.325	-0.338901	-0.203437	-0.723788	-0.623405	-3.54864	-2.55184	1.74556	1.86897	1.00155	-0.0641468	3.69226		-1.26613
20200519	0.215	0.188137	-0.391368	-1.04304	-0.615754	-3.51228	-2.46291	1.82473	1.89641	1.00663	-0.0621824	3.69103		-1.24628
20200520	0.863	-0.379061	0.0930285	-1.24752	-0.509544	-3.46828	-2.3633	1.90326	1.92336	1.01169	-0.0602183	3.68981		-1.53355
20200521	2.05	0.0944439	0.983833	-1.2579	-0.30791	-3.41795	-2.25312	1.98108	1.94981	1.01673	-0.0582544	3.68858		-0.179627
20200522	4.04	0.706772	1.23276	-0.995398	-0.0286365	-3.36166	-2.13256	2.05813	1.97574	1.02176	-0.0562907	3.68735		0.944137
20200523	2.62	-0.459874	0.0445973	-0.448412	0.298514	-3.29932	-2.00185	2.13433	2.00115	1.02677	-0.0543273	3.68612		-0.863689
20200524	2.05	-0.59741	-2.10614	0.242999	0.636059	-3.23066	-1.86128	2.20964	2.02602	1.03176	-0.0523641	3.6849		-2.46055
20200525	5.26	2.2474	-3.31762	0.853303	0.944577	-3.15531	-1.71119	2.28398	2.05033	1.03673	-0.0504012	3.68367		-0.216918
20200526	3.55	-1.90284	-1.3248	1.20292	1.18489	-3.07279	-1.55199	2.35727	2.07408	1.04169	-0.0484386	3.68244		-2.02472
20200527	5.74	-4.46511	2.8466	1.29649	1.3209	-2.98254	-1.38416	2.42947	2.09726	1.04663	-0.0464763	3.68122		-0.322011
20200528	19.3	5.63547	5.74779	1.18013	1.3287	-2.88389	-1.20823	2.5005	2.11985	1.05154	-0.0445144	3.67999		12.5634
20200529	6.11	-4.84282	3.05066	0.921459	1.19771	-2.77608	-1.02477	2.57029	2.14184	1.05645	-0.0425528	3.67877		-0.870699
20200530	3.14	-1.42731	-2.87021	0.708149	0.925332	-2.65854	-0.834362	2.63879	2.16322	1.06133	-0.0405915	3.67755		-3.58937
20200531	2.49	1.98541	-6.90148	0.761569	0.517822	-2.5309	-0.637624	2.70591	2.18398	1.06619	-0.0386307	3.67632		-4.1545
20200601	2.62	0.00174357	-5.46506	1.19972	0.00556782	-2.39306	-0.435169	2.77161	2.2041	1.07104	-0.0366702	3.6751		-4.2636
20200602	2.38	-7.1809	0.901587	1.70994	-0.555667	-2.2451	-0.227645	2.8358	2.22357	1.07587	-0.0347101	3.67388		-4.56938
20200603	21.8	7.4036	6.1339	1.80611	-1.10522	-2.0872	-0.0157105	2.89843	2.24239	1.08068	-0.0327505	3.67266		15.3436
20200604	6.88	-5.7134	4.82788	1.09758	-1.59216	-1.91957	0.199982	2.95943	2.26053	1.08547	-0.0307913	3.67144		0.212065
20200605	3.33	-3.91983	0.686206	-0.339538	-1.99088	-1.74245	0.418783	3.01873	2.27799	1.09025	-0.0288326	3.67022		-3.57316
20200606	2.49	-0.0829451	-2.06819	-2.18437	-2.28748	-1.55627	0.640044	3.07627	2.29475	1.095	-0.0268744	3.669		-4.33551
20200607	2.05	1.08192	-2.27669	-4.0311	-2.46799	-1.36193	0.863106	3.13197	2.3108	1.09974	-0.0249167	3.66778		-5.22587
20200608	2.28	1.24567	-1.44882	-5.38863	-2.51853	-1.16067	1.0873	3.18578	2.32614	1.10446	-0.0229595	3.66656		-5.59177
20200609	1.31	0.603929	-1.17749	-5.83712	-2.43034	-0.953904	1.31196	3.23763	2.34075	1.10916	-0.0210028	3.66534		-6.41068
20200610	2.49	-0.480933	-0.750032	-5.21045	-2.2064	-0.742907	1.53643	3.28745	2.35461	1.11385	-0.0190467	3.66413		-6.44142
20200611	1.57	-5.4219	0.642675	-3.60064	-1.8642	-0.528779	1.76004	3.33518	2.36771	1.11851	-0.0170911	3.66291		-8.37986
20200612	18.7	8.1462	1.47498	-1.39822	-1.42357	-0.312453	1.98211	3.38074	2.38005	1.12316	-0.0151361	3.66169		8.22296
20200613	5.74	-10.1157	2.96162	1.0131	-0.904844	-0.0947354	2.20198	3.42408	2.39161	1.12778	-0.0131817	3.66048		-6.14097
20200614	34	11.702	5.83673	3.56189	-0.328727	0.123583	2.41899	3.46513	2.40238	1.13239	-0.011228	3.65926		21.1006
20200615	15.7	-8.94917	4.30235	6.31512	0.283955	0.341714	2.63246	3.50381	2.41235	1.13699	-0.00927483	3.65805		1.6683
20200616	5.74	-15.1451	-2.86016	8.8737	0.915589	0.55892	2.84173	3.54007	2.4215	1.14156	-0.00732233	3.65683		-9.13157
20200617	3.78	-9.49608	-13.6399	10.5387	1.55471	0.774474	3.04615	3.57383	2.42983	1.14611	-0.00537049	3.65562		-12.5973
20200618	28.5	21.063	-20.2922	10.5665	2.18813	0.98755	3.24506	3.60503	2.43732	1.15065	-0.00341933	3.65441		11.3374
20200619	9.92	-2.62378	-14.3103	8.46082	2.79727	1.19729	3.43781	3.6336	2.44397	1.15516	-0.00146886	3.65319		-8.47326
20200620	4.93	-20.9767	2.03342	4.70713	3.36176	1.40289	3.62374	3.65948	2.44976	1.15966	0.000480895	3.65198		-14.2362
20200621	11.4	-31.9878	23.6542	-0.00208906	3.86089	1.60359	3.80222	3.68258	2.4547	1.16414	0.00242993	3.65077		-8.33565
20200622	93.7	35.1293	42.6791	-4.98449	4.27369	1.7986	3.97263	3.70284	2.45876	1.1686	0.00437822	3.64956		72.8239
20200623	18.1	-38.0386	43.978	-9.58243	4.5787	1.98743	4.13438	3.72018	2.46196	1.17304	0.00632575	3.64835		-3.64299
20200624	9	-24.9272	25.1546	-13.2468	4.75313	2.17009	4.28689	3.73453	2.46428	1.17746	0.0082725	3.64714		-13.0194
20200625	4.93	2.87618	-4.96758	-15.4929	4.77891	2.34653	4.42961	3.74582	2.46572	1.18186	0.0102185	3.64593		-17.5843
20200626	3.55	31.9824	-35.6379	-15.8077	4.64867	2.51668	4.56199	3.75397	2.46628	1.18625	0.0121636	3.64472		-19.4632
20200627	2.75	50.2947	-56.8736	-13.5618	4.3652	2.68074	4.68353	3.75892	2.46595	1.19061	0.014108	3.64351		-20.1407
20200628	7.29	53.6988	-60.9173	-8.35207	3.9347	2.83881	4.79369	3.7606	2.46475	1.19496	0.0160515	3.64231		-15.5705
20200629	4.04	26.0874	-43.3433	-0.982335	3.35957	2.99095	4.89199	3.75894	2.46265	1.19928	0.0179941	3.6411		-18.2383
20200630	3.14	-19.1394	-6.40194	6.99069	2.64065	3.1371	4.97792	3.7539	2.45967	1.20359	0.0199359	3.63989		-18.5506
20200701	2.75	-69.984	37.9456	13.8142	1.77878	3.27712	5.05101	3.74542	2.4558	1.20788	0.0218768	3.63869		-18.2242
20200702	172	70.8953	63.049	17.7037	0.775658	3.41073	5.11078	3.73346	2.45104	1.21215	0.0238168	3.63748		151.648
20200703	16.9	-68.9531	49.0527	17.3823	-0.355907	3.53758	5.15676	3.71797	2.44541	1.21639	0.0257559	3.63628		-2.51815
20200704	6.88	-38.8249	13.6417	13.6264	-1.56352	3.65728	5.18851	3.69893	2.4389	1.22062	0.0276941	3.63507		-11.5568
20200705	9	5.15644	-21.2551	7.74551	-2.77936	3.76957	5.2056	3.67634	2.43152	1.22484	0.0296313	3.63387		-8.3531
20200706	6.11	27.651	-38.8331	1.05637	-3.9351	3.87424	5.20762	3.6502	2.42327	1.22903	0.0315675	3.63266		-10.1257
20200707	4.61	32.8855	-38.0774	-5.1957	-4.96289	3.97113	5.1942	3.62052	2.41416	1.2332	0.0335028	3.63146		-10.3876
20200708	3.78	25.8637	-26.5347	-10.1224	-5.79379	4.06002	5.16503	3.58734	2.40421	1.23735	0.0354371	3.63026		-10.7934
20200709	3.33	14.8323	-11.9737	-13.1213	-6.35857	4.14065	5.11981	3.55072	2.39341	1.24149	0.0373703	3.62906		-10.2626
20200710	2.9	2.70656	0.176348	-13.7162	-6.59661	4.21255	5.0583	3.51074	2.38177	1.2456	0.0393026	3.62786		-10.8333
20200711	3.14	-5.32241	6.27912	-11.5113	-6.4849	4.27439	4.98033	3.46748	2.36931	1.2497	0.0412338	3.62666		-10.5546
20200712	5.74	-5.7691	3.94587	-6.40444	-6.04699	4.32396	4.88584	3.42104	2.35604	1.25378	0.0431639	3.62546		-8.22767
20200713	22.5	11.5708	-4.19626	0.359835	-5.31912	4.35845	4.77487	3.3715	2.34195	1.25783	0.045093	3.62426		7.73436
20200714	9.92	-2.08075	-9.5445	6.50926	-4.33796	4.37483	4.6476	3.31895	2.32707	1.26187	0.047021	3.62306		-5.116
20200715	4.61	-15.2988	-6.5617	10.0664	-3.14034	4.37005	4.50434	3.26351	2.3114	1.26589	0.0489479	3.62186		-11.7941
20200716	38	4.82792	5.29262	10.759	-1.76435	4.34124	4.3455	3.20526	2.29495	1.26989	0.0508736	3.62066		20.8796
20200717	63.3	19.07	16.8238	8.99688	-0.258497	4.28564	4.17162	3.14431	2.27773	1.27387	0.0527983	3.61946		44.8907
20200718	31.6	-12.3298	18.7612	5.35257	1.29943	4.20045	3.98329	3.08077	2.25976	1.27784	0.0547217	3.61827		11.784
20200719	12.9	-19.6249	10.8353	0.707552	2.81993	4.08293	3.7812	3.01473	2.24103	1.28178	0.0566441	3.61707		-8.08201
20200720	6.49	-7.48549	-4.109	-3.86373	4.21106	3.93034	3.56613	2.94631	2.22157	1.2857	0.0585652	3.61587		-15.4582
20200721	4.32	8.89096	-19.5172	-7.25538	5.38068	3.73989	3.33889	2.8756	2.20138	1.28961	0.0604851	3.61468		-17.8816
20200722	3.55	17.2004	-28.2987	-8.38408	6.23696	3.50887	3.10036	2.80272	2.18048	1.2935	0.0624039	3.61348		-19.4824
20200723	3.33	11.5535	-24.5173	-6.57926	6.70632	3.23496	2.85145	2.72775	2.15887	1.29737	0.0643213	3.61229		-19.5431
20200724	2.75	-9.22457	-7.61435	-2.61945	6.78334	2.91762	2.59316	2.65082	2.13656	1.30122	0.0662376	3.6111		-19.4584
20200725	2.49	-35.997	15.532	2.10236	6.49861	2.55907	2.32648	2.57202	2.11357	1.30505	0.0681526	3.6099		-18.3626
20200726	93.7	37.0374	30.969	6.12603	5.8882	2.16385	2.05245	2.49145	2.08991	1.30886	0.0700663	3.60871		74.1325
20200727	18.7	-34.9934	27.532	8.26921	4.99254	1.7377	1.77206	2.40922	2.06558	1.31265	0.0719787	3.60752		0.80777
20200728	6.49	-31.0045	12.8061	8.49186	3.8623	1.28703	1.48634	2.32543	2.04061	1.31643	0.0738898	3.60633		-9.70651
20200729	3.78	-13.7747	-3.41283	7.1923	2.56946	0.818456	1.19626	2.24019	2.01499	1.32019	0.0757996	3.60514		-9.99524
20200730	2.96	0.98747	-14.3149	4.81579	1.19131	0.338664	0.902845	2.1536	1.98874	1.32392	0.077708	3.60395		-8.51168
20200731	2.9	8.60533	-17.05	1.84114	-0.195848	-0.145621	0.607081	2.06577	1.96187	1.32764	0.0796151	3.60276		-6.60356
20200801	2.28	9.23261	-12.9687	-1.17183	-1.51629	-0.627663	0.309972	1.9768	1.93439	1.33135	0.0815208	3.60157		-4.90793
20200802	3.14	8.58923	-6.44358	-3.60841	-2.69519	-1.10073	0.0125196	1.88678	1.90632	1.33503	0.0834251	3.60038		-1.46275
20200803	2.28	4.5892	-0.583009	-4.99195	-3.66322	-1.55808	-0.284276	1.79583	1.87766	1.3387	0.085328	3.59919		-0.985765
20200804	2.05	2.11133	3.51488	-5.27363	-4.36125	-1.99296	-0.579411	1.70406	1.84842	1.34234	0.0872295	3.598		0.35258
20200805	1.64	0.514475	5.17022	-4.60363	-4.75104	-2.39876	-0.871886	1.61155	1.81861	1.34597	0.0891295	3.59682		1.08106
20200806	0.663	-0.516714	4.72196	-3.26604	-4.83106	-2.7695	-1.1607	1.51843	1.78825	1.34958	0.0910281	3.59563		0.939213
20200807	0.789	-0.0160761	3.28965	-1.58992	-4.6375	-3.10017	-1.44485	1.42478	1.75734	1.35318	0.0929253	3.59444		1.68366
20200808	0.284	-0.913724	1.92071	0.101301	-4.22407	-3.38689	-1.72337	1.33072	1.7259	1.35675	0.0948209	3.59326		1.10829
20200809	0.325	-0.825462	1.24806	1.48623	-3.64849	-3.62674	-1.99528	1.23635	1.69394	1.36031	0.096715	3.59207		1.90883
20200810	3.55	1.3295	1.0521	2.30616	-2.96307	-3.81761	-2.25964	1.14177	1.66147	1.36385	0.0986077	3.59089		4.68777
20200811	1.97	-0.433424	0.832822	2.49397	-2.21481	-3.9582	-2.51554	1.04708	1.62849	1.36737	0.100499	3.58971		2.89337
20200812	1.97	-0.207507	0.501313	2.16117	-1.45166	-4.04781	-2.76211	0.952402	1.59502	1.37087	0.102388	3.58852		2.45498
20200813	1.71	0.218856	0.155655	1.52493	-0.719117	-4.08651	-2.99851	0.857824	1.56107	1.37436	0.104276	3.58734		1.89944
20200814	0.596	-0.266039	-0.0531033	0.824958	-0.0560532	-4.07531	-3.22398	0.763454	1.52665	1.37783	0.106163	3.58616		0.505815
20200815	0.215	-0.13266	-0.0432897	0.239626	0.508169	-4.01615	-3.43776	0.669395	1.49178	1.38128	0.108047	3.58498		0.0636765
20200816	0.187	-0.367824	0.170909	-0.129662	0.955179	-3.91198	-3.63915	0.575752	1.45645	1.38471	0.109931	3.58379		-0.326577
20200817	1.38	0.739197	0.179571	-0.264417	1.28017	-3.76693	-3.82747	0.482628	1.42069	1.38813	0.111812	3.58261		0.65435
20200818	0.163	-0.208821	-0.239964	-0.199973	1.48992	-3.58627	-4.00208	0.390127	1.3845	1.39153	0.113692	3.58143		-0.648758
20200819	0.163	-0.20564	-0.566469	-0.0177096	1.59729	-3.37637	-4.16235	0.298354	1.34789	1.39491	0.11557	3.58025		-0.789819
20200820	0.163	-0.460062	-0.30911	0.176373	1.62063	-3.1442	-4.30767	0.207411	1.31088	1.39827	0.117447	3.57908		-0.592799
20200821	1.91	0.613183	0.359494	0.298559	1.57926	-2.89688	-4.43747	0.117403	1.27348	1.40162	0.119322	3.5779		1.27124
20200822	1.64	-0.13197	0.67636	0.31177	1.49168	-2.64143	-4.55121	0.028431	1.23569	1.40495	0.121195	3.57672		0.85616
20200823	1.38	0.260543	0.325107	0.225104	1.37568	-2.38479	-4.64838	-0.0594026	1.19753	1.40826	0.123067	3.57554		0.810755
20200824	0.187	-0.484352	-0.213829	0.0807947	1.24655	-2.13342	-4.72852	-0.146	1.15901	1.41155	0.124936	3.57436		-0.617386
20200825	0.214	0.208239	-0.404216	-0.0665716	1.1166	-1.89322	-4.79117	-0.231264	1.12013	1.41483	0.126804	3.57319		-0.262548
20200826	0.37	0.247647	-0.292858	-0.174225	0.996139	-1.66941	-4.83596	-0.315106	1.08091	1.41809	0.12867	3.57201		-0.219436
20200827	0.119	0.189781	-0.131423	-0.222928	0.892446	-1.46634	-4.86257	-0.397441	1.04137	1.42133	0.130535	3.57084		-0.16457
20200828	0.119	0.0448078	0.0204629	-0.214548	0.808125	-1.2874	-4.87072	-0.478198	1.0015	1.42456	0.132397	3.56966		-0.149277
20200829	0.119	-0.0640701	0.116682	-0.163606	0.742246	-1.135	-4.86021	-0.557319	0.961327	1.42776	0.134258	3.56849		-0.110994
20200830	0.1	-0.104502	0.0911202	-0.0903898	0.69094	-1.01044	-4.83098	-0.63476	0.920855	1.43096	0.136117	3.56732		-0.103772
20200831	0.084	0.05022	0.0959766	-0.0207593	0.65045	-0.913889	-4.78308	-0.710491	0.880095	1.43413	0.137974	3.56614		0.125437
20200901	0.084	-0.112529	0.170226	0.0341378	0.616709	-0.844449	-4.71674	-0.784493	0.839059	1.43729	0.13983	3.56497		0.0918344
20200902	0.533	0.312306	0.130938	0.0676583	0.585983	-0.800436	-4.63236	-0.856756	0.797757	1.44043	0.141683	3.5638		0.510902
20200903	0.119	-0.407862	0.000790622	0.0726326	0.555038	-0.779732	-4.53046	-0.927278	0.756199	1.44355	0.143535	3.56263		-0.334439
20200904	0.1	0.00202652	-0.0722122	0.0527067	0.521744	-0.780049	-4.41169	-0.996053	0.714396	1.44666	0.145384	3.56146		-0.017479
20200905	0.084	-0.00265005	-0.0738662	0.0142319	0.486692	-0.79863	-4.27683	-1.06308	0.672359	1.44975	0.147232	3.56029		-0.0622843
20200906	0.1	-0.00309267	-0.062208	-0.0379148	0.451062	-0.832431	-4.12676	-1.12837	0.630098	1.45282	0.149077	3.55912		-0.103215
20200907	0.084	0.0905904	-0.0523118	-0.0951211	0.41584	-0.878131	-3.96252	-1.19191	0.587623	1.45588	0.150921	3.55795		-0.0568425
20200908	0.084	0.0378838	-0.0396632	-0.14724	0.381454	-0.932239	-3.78524	-1.25371	0.544945	1.45892	0.152763	3.55678		-0.149019
20200909	0.247	0.102838	0.026376	-0.18443	0.348047	-0.991163	-3.5961	-1.31376	0.502076	1.46195	0.154603	3.55561		-0.0552161
20200910	0.084	-0.0023196	0.0978929	-0.195303	0.315365	-1.05133	-3.39632	-1.37208	0.459024	1.46495	0.156441	3.55444		-0.0997294
20200911	0.084	0.173093	0.0423527	-0.159447	0.281869	-1.10937	-3.18713	-1.42866	0.4158	1.46794	0.158276	3.55327		0.0559984
20200912	0.069	0.121491	-0.185324	-0.0606515	0.244522	-1.16201	-2.96981	-1.48351	0.372416	1.47092	0.16011	3.55211		-0.124485
20200913	0.069	-0.133591	-0.351739	0.0999797	0.198964	-1.206	-2.74557	-1.53662	0.32888	1.47388	0.161942	3.55094		-0.38535
20200914	0.325	0.173418	-0.316699	0.29528	0.140497	-1.23801	-2.51563	-1.588	0.285205	1.47682	0.163771	3.54978		0.151999
20200915	0.215	-0.396949	-0.110488	0.475788	0.0657667	-1.25468	-2.28118	-1.63765	0.241399	1.47974	0.165599	3.54861		-0.0316484
20200916	1.46	-0.171674	0.295888	0.583314	-0.0276243	-1.25278	-2.04339	-1.68559	0.197474	1.48265	0.167424	3.54745		0.707529
20200917	2	0.578711	0.588278	0.591812	-0.141683	-1.2293	-1.80342	-1.7318	0.15344	1.48555	0.169248	3.54628		1.7588
20200918	1.91	0.746687	0.29836	0.509791	-0.278187	-1.18178	-1.56237	-1.77629	0.109309	1.48842	0.171069	3.54512		1.55484
20200919	0.284	-0.845692	-0.328907	0.390619	-0.436158	-1.10838	-1.32131	-1.81907	0.0650896	1.49128	0.172888	3.54396		-0.78398
20200920	0.215	-0.131785	-0.64007	0.301742	-0.609772	-1.00828	-1.08123	-1.86014	0.0207939	1.49413	0.174705	3.5428		-0.470113
20200921	1.16	0.202977	-0.441657	0.269272	-0.784438	-0.88197	-0.843018	-1.8995	-0.0235678	1.49696	0.17652	3.54163		0.0305918
20200922	0.214	-0.751986	0.0474893	0.254438	-0.939675	-0.730736	-0.607486	-1.93716	-0.0679843	1.49977	0.178332	3.54047		-0.450059
20200923	2.49	0.771621	0.402925	0.157938	-1.05148	-0.556535	-0.375363	-1.97313	-0.112445	1.50256	0.180143	3.53931		1.33248
20200924	2.03	-0.0134776	0.669099	-0.129984	-1.09712	-0.361766	-0.14734	-2.0074	-0.156937	1.50534	0.181951	3.53815		0.525638
20200925	1.91	-0.582609	1.14174	-0.680842	-1.06352	-0.149098	0.0759126	-2.03999	-0.201452	1.50811	0.183757	3.53699		-0.121714
20200926	2.9	0.347088	1.72917	-1.42879	-0.95154	0.0782364	0.293742	-2.07089	-0.245976	1.51086	0.18556	3.53583		0.647461
20200927	2.19	-0.239718	1.73636	-2.15947	-0.772185	0.316366	0.505498	-2.10012	-0.290498	1.51359	0.187362	3.53467		-0.662828
20200928	1.78	-0.0416675	0.699121	-2.59031	-0.53994	0.561088	0.710534	-2.12769	-0.335007	1.51631	0.189161	3.53352		-1.93286
20200929	1.78	0.988827	-1.18583	-2.51107	-0.269333	0.808068	0.908208	-2.15358	-0.379491	1.51901	0.190958	3.53236		-2.70807
20200930	1.16	1.39342	-3.3556	-1.80627	0.0233436	1.05291	1.09788	-2.17782	-0.423939	1.52169	0.192753	3.5312		-3.76845
20201001	0.215	-0.324751	-4.41569	-0.50171	0.319828	1.29121	1.27894	-2.20042	-0.468339	1.52436	0.194545	3.53005		-5.24215
20201002	0.215	-4.53275	-2.62609	1.21104	0.600126	1.51871	1.45075	-2.22137	-0.51268	1.52702	0.196335	3.52889		-5.9478
20201003	9	-2.26416	1.78368	2.90898	0.843812	1.73123	1.6127	-2.24069	-0.556949	1.52966	0.198122	3.52773		2.42849
20201004	21.8	5.01963	5.55408	4.09645	1.03035	1.92476	1.76418	-2.25839	-0.601136	1.53228	0.199908	3.52658		14.6702
20201005	16.3	-0.857993	5.48498	4.33835	1.14026	2.09557	1.90458	-2.27447	-0.645229	1.53489	0.20169	3.52543		8.96533
20201006	12.9	-1.32667	2.56266	3.53475	1.16414	2.24051	2.0333	-2.28896	-0.689215	1.53748	0.203471	3.52427		4.77074
20201007	6.88	-1.83676	-0.743715	1.93879	1.11462	2.35744	2.14977	-2.30186	-0.733084	1.54006	0.205249	3.52312		-0.641681
20201008	3.55	-1.23188	-2.69503	-0.115312	1.0117	2.44501	2.25345	-2.31318	-0.776823	1.54262	0.207025	3.52197		-4.04222
20201009	2.62	-0.109972	-2.86838	-2.24252	0.875967	2.50242	2.3439	-2.32293	-0.820421	1.54516	0.208798	3.52081		-5.22088
20201010	2.19	0.468212	-2.25206	-3.93592	0.727714	2.52933	2.42085	-2.33114	-0.863865	1.54769	0.210569	3.51966		-5.71976
20201011	2.11	1.08215	-2.20927	-4.67999	0.586563	2.52595	2.48429	-2.33782	-0.907145	1.55021	0.212337	3.51851		-5.80712
20201012	2	1.80954	-3.26105	-4.22986	0.466533	2.49338	2.53444	-2.34298	-0.950247	1.55271	0.214103	3.51736		-5.68137
20201013	2.08	1.84918	-4.55445	-2.70645	0.363514	2.43373	2.57168	-2.34665	-0.993161	1.55519	0.215866	3.51621		-5.41172
20201014	0.42	-2.1418	-3.62283	-0.551676	0.268924	2.34959	2.59652	-2.34885	-1.03587	1.55766	0.217627	3.51506		-6.3163
20201015	2.49	-6.941	0.68729	1.67606	0.174918	2.24382	2.60955	-2.34962	-1.07837	1.56012	0.219385	3.51391		-4.57765
20201016	22.5	7.24534	5.35756	3.39777	0.0737744	2.11953	2.61136	-2.34901	-1.12064	1.56255	0.221141	3.51277		16.0007
20201017	11.9	-4.02761	5.06903	4.12632	-0.0412707	1.97996	2.60259	-2.34705	-1.16268	1.56498	0.222895	3.51162		5.16774
20201018	7.29	-3.91657	1.36518	3.81691	-0.171628	1.82843	2.58385	-2.3438	-1.20447	1.56739	0.224645	3.51047		1.26552
20201019	3.78	-2.49475	-2.0279	2.78953	-0.314195	1.66807	2.55579	-2.3393	-1.24599	1.56978	0.226393	3.50932		-1.73312
20201020	3.14	-0.357394	-3.30076	1.42312	-0.464105	1.50182	2.51901	-2.33362	-1.28724	1.57216	0.228139	3.50818		-2.23503
20201021	2.75	0.503934	-2.64444	0.0587481	-0.616355	1.33243	2.47417	-2.3268	-1.3282	1.57452	0.229882	3.50703		-2.08176
20201022	2.49	-0.0113922	-1.06171	-1.05918	-0.765504	1.16257	2.42188	-2.3189	-1.36886	1.57687	0.231622	3.50589		-2.13228
20201023	2.75	-0.170097	0.3669	-1.81494	-0.901746	0.994788	2.36279	-2.30998	-1.4092	1.57921	0.23336	3.50474		-1.61813
20201024	2.62	0.347963	1.0803	-2.20114	-1.01066	0.831525	2.29752	-2.30008	-1.44922	1.58153	0.235095	3.5036		-0.772878
20201025	2.05	-0.0827837	1.1173	-2.30552	-1.07563	0.675042	2.2267	-2.28928	-1.48891	1.58383	0.236828	3.50246		-1.27101
20201026	1.31	-0.324546	0.853251	-2.22711	-1.0808	0.527313	2.15096	-2.27761	-1.52824	1.58612	0.238558	3.50131		-1.69841
20201027	1.91	0.461927	0.512052	-2.03248	-1.01786	0.389818	2.07089	-2.26514	-1.56721	1.58839	0.240285	3.50017		-1.0585
20201028	0.789	-0.398745	0.0843912	-1.72489	-0.891041	0.263349	1.98708	-2.25193	-1.6058	1.59065	0.242009	3.49903		-2.03924
20201029	0.863	-0.232194	-0.381234	-1.25435	-0.714829	0.148081	1.90007	-2.23803	-1.64401	1.5929	0.243731	3.49789		-1.86778
20201030	2.11	0.638476	-0.833373	-0.608675	-0.506343	0.0438895	1.81041	-2.22349	-1.68181	1.59513	0.24545	3.49675		-0.803572
20201031	2.13	0.29777	-0.963332	0.170413	-0.284292	-0.0494367	1.71863	-2.20837	-1.71921	1.59734	0.247166	3.49561		-0.49515
20201101	1.09	-2.35766	-0.114073	0.957482	-0.0668101	-0.132131	1.62528	-2.19273	-1.75617	1.59955	0.24888	3.49447		-1.51425
20201102	8.12	2.57131	1.17568	1.55953	0.128861	-0.204511	1.53088	-2.17662	-1.7927	1.60173	0.250591	3.49333		5.30652
20201103	5.26	-0.602435	1.12275	1.79901	0.286708	-0.266962	1.43594	-2.1601	-1.82879	1.60391	0.252299	3.49219		2.31933
20201104	3.78	-0.706494	0.0840539	1.63633	0.394274	-0.31996	1.34096	-2.14324	-1.86441	1.60606	0.254004	3.49105		1.01389
20201105	3.14	0.010832	-0.589919	1.1772	0.445887	-0.363952	1.24639	-2.12607	-1.89956	1.60821	0.255707	3.48991		0.598112
20201106	2.75	-0.173471	-0.473352	0.571523	0.445157	-0.39928	1.15265	-2.10867	-1.93422	1.61034	0.257406	3.48878		-0.0753
20201107	2.28	0.606707	-0.195599	-0.0278275	0.400419	-0.426397	1.06011	-2.09109	-1.96839	1.61245	0.259103	3.48764		0.38328
20201108	0.937	-0.466347	-0.256432	-0.495855	0.321587	-0.445869	0.969124	-2.07339	-2.00205	1.61455	0.260797	3.4865		-1.21863
20201109	0.789	-0.138253	-0.311807	-0.763998	0.219227	-0.458319	0.879993	-2.05562	-2.03519	1.61664	0.262489	3.48537		-1.21406
20201110	0.663	-0.0895561	-0.0639147	-0.825406	0.104912	-0.464477	0.792982	-2.03784	-2.0678	1.61871	0.264177	3.48423		-0.978877
20201111	1.78	0.672385	0.22041	-0.714115	-0.00989839	-0.465141	0.708321	-2.0201	-2.09987	1.62076	0.265862	3.4831		0.17868
20201112	0.663	-0.409277	0.198845	-0.496809	-0.115543	-0.461188	0.626211	-2.00247	-2.13139	1.62281	0.267545	3.48197		-0.707242
20201113	0.533	-0.576449	0.0633628	-0.253426	-0.204054	-0.45346	0.546829	-1.98499	-2.16235	1.62484	0.269225	3.48083		-0.766513
20201114	2.13	1.15946	0.00828134	-0.0399986	-0.269354	-0.442773	0.470329	-1.96773	-2.19273	1.62685	0.270902	3.4797		1.12774
20201115	0.596	-0.613482	0.0277969	0.108525	-0.308712	-0.429864	0.396838	-1.95073	-2.22252	1.62885	0.272575	3.47857		-0.477161
20201116	0.533	-0.905083	0.10831	0.175277	-0.321525	-0.415334	0.326456	-1.93405	-2.25172	1.63084	0.274246	3.47744		-0.621496
20201117	2.03	1.35579	0.152035	0.166453	-0.309402	-0.39961	0.259267	-1.91775	-2.28031	1.63281	0.275914	3.47631		1.67427
20201118	0.474	-0.65203	-0.0369343	0.0999359	-0.27551	-0.382928	0.195332	-1.90187	-2.30828	1.63477	0.27758	3.47518		-0.589028
20201119	0.474	-0.0594676	-0.24672	0.0139626	-0.224695	-0.365391	0.134694	-1.88646	-2.33563	1.63672	0.279242	3.47405		-0.292225
20201120	0.42	0.135323	-0.151993	-0.0510137	-0.163162	-0.347063	0.0773885	-1.87158	-2.36233	1.63865	0.280901	3.47292		-0.0676837
20201121	0.163	-0.694903	0.163367	-0.0805983	-0.0967446	-0.328044	0.0234454	-1.85726	-2.38839	1.64057	0.282557	3.47179		-0.612135
20201122	2.13	0.735764	0.390526	-0.0768516	-0.0309838	-0.308435	-0.0271141	-1.84357	-2.41379	1.64247	0.28421	3.47066		1.04944
20201123	0.474	-0.20499	0.240376	-0.0541446	0.0288926	-0.288344	-0.0742799	-1.83053	-2.43853	1.64436	0.28586	3.46953		-0.018758
20201124	0.789	0.0928579	-0.183404	-0.030402	0.0774612	-0.267838	-0.118059	-1.81821	-2.46259	1.64624	0.287507	3.4684		-0.120948
20201125	0.533	-0.21836	-0.347172	-0.0103418	0.110785	-0.246909	-0.158479	-1.80665	-2.48596	1.6481	0.289151	3.46728		-0.575874
20201126	0.533	-0.229258	-0.0105271	0.00699103	0.127689	-0.225564	-0.195578	-1.79587	-2.50864	1.64995	0.290792	3.46615		-0.232794
20201127	2	0.921478	0.321617	0.0187172	0.128882	-0.203833	-0.229402	-1.78593	-2.53062	1.65179	0.29243	3.46503		1.26181
20201128	0.596	-0.593313	0.2744	0.0173448	0.115595	-0.181822	-0.259994	-1.77686	-2.55188	1.65361	0.294065	3.4639		-0.301568
20201129	0.533	-0.156724	0.0278725	0.00125131	0.0903341	-0.15969	-0.287401	-1.76868	-2.57243	1.65542	0.295697	3.46278		-0.1276
20201130	0.42	0.11189	-0.177611	-0.0211693	0.056762	-0.137657	-0.311674	-1.76142	-2.59226	1.65721	0.297326	3.46165		-0.0868901
20201201	0.163	-0.153541	-0.221134	-0.0371494	0.0195053	-0.115984	-0.332868	-1.75511	-2.61135	1.65899	0.298951	3.46053		-0.411825
20201202	0.325	-0.172765	-0.0264242	-0.0351456	-0.0164621	-0.0949123	-0.351032	-1.74977	-2.62971	1.66076	0.300574	3.4594		-0.234334
20201203	1.97	0.689297	0.182741	-0.0100194	-0.0478187	-0.0746563	-0.366219	-1.74542	-2.64732	1.66252	0.302193	3.45828		0.862019
20201204	0.325	-0.505418	0.0752245	0.0364192	-0.0720204	-0.0553738	-0.37849	-1.74209	-2.66419	1.66426	0.30381	3.45716		-0.393775
20201205	0.325	0.203129	-0.185556	0.0869638	-0.0880703	-0.0372762	-0.387924	-1.73978	-2.6803	1.66599	0.305423	3.45604		0.104537
20201206	0.284	-0.31801	-0.112528	0.112385	-0.0967796	-0.0206309	-0.39461	-1.73852	-2.69565	1.66771	0.307033	3.45492		-0.318152
20201207	0.247	-0.599009	0.237151	0.099215	-0.0991201	-0.00565106	-0.398636	-1.7383	-2.71025	1.66941	0.308639	3.4538		-0.262643
20201208	1.91	1.00733	0.419694	0.0494317	-0.0956502	0.00755395	-0.4001	-1.73913	-2.72407	1.6711	0.310243	3.45268		1.47646
20201209	0.37	-0.517298	0.163779	-0.0278054	-0.0871165	0.0189154	-0.399106	-1.74102	-2.73713	1.67278	0.311843	3.45156		-0.381325
20201210	0.37	-0.0808744	-0.200022	-0.103093	-0.0742395	0.0284244	-0.395775	-1.74396	-2.74941	1.67444	0.31344	3.45044		-0.38399
20201211	0.163	-0.0496051	-0.304787	-0.142656	-0.0578406	0.0361232	-0.390238	-1.74793	-2.76093	1.67609	0.315034	3.44932		-0.497048
20201212	0.325	0.282994	-0.24416	-0.134491	-0.0391754	0.0420566	-0.382626	-1.75293	-2.77166	1.67773	0.316625	3.4482		-0.095657
20201213	0.325	-0.337649	-0.0769156	-0.0887757	-0.0195388	0.0463329	-0.373077	-1.75893	-2.78163	1.67936	0.318212	3.44709		-0.50334
20201214	0.37	-0.191427	0.266211	-0.0327395	-0.000335518	0.0491158	-0.361732	-1.76592	-2.79081	1.68097	0.319796	3.44597		0.0420446
20201215	1.91	0.654841	0.485896	0.0116808	0.0173928	0.0505731	-0.348734	-1.77386	-2.79922	1.68257	0.321377	3.44485		1.15242
20201216	0.325	-0.325557	0.265466	0.034264	0.0325097	0.0509009	-0.334225	-1.78273	-2.80686	1.68416	0.322955	3.44374		-0.0258266
20201217	0.284	0.0758905	-0.147158	0.0530986	0.0440475	0.0503183	-0.318358	-1.7925	-2.81372	1.68573	0.324529	3.44262		-0.0181691
20201218	0.284	-0.198539	-0.398073	0.0886248	0.0505448	0.0490322	-0.301299	-1.80314	-2.81981	1.6873	0.3261	3.44151		-0.507988
20201219	0.247	0.207515	-0.437539	0.140589	0.0504331	0.0472361	-0.283217	-1.81462	-2.82513	1.68885	0.327668	3.4404		-0.0894358
20201220	0.215	-0.162081	-0.298953	0.187365	0.0446196	0.0451656	-0.264281	-1.82688	-2.82968	1.69039	0.329232	3.43928		-0.27367
20201221	0.1	-0.682533	0.0336505	0.194595	0.0357782	0.0430839	-0.244652	-1.8399	-2.83346	1.69191	0.330793	3.43817		-0.454287
20201222	1.91	1.10694	0.332995	0.136016	0.0261013	0.0412357	-0.224487	-1.85364	-2.83648	1.69342	0.332351	3.43706		1.57595
20201223	0.284	-0.468535	0.304111	0.0224544	0.0170867	0.0397861	-0.203936	-1.86806	-2.83874	1.69493	0.333905	3.43595		-0.141969
20201224	0.214	-0.121784	0.0265572	-0.101253	0.0101378	0.0387633	-0.183144	-1.88312	-2.84024	1.69641	0.335456	3.43483		-0.19648
20201225	0.1	0.164983	-0.218947	-0.188774	0.00571189	0.0381533	-0.162248	-1.89877	-2.84098	1.69789	0.337003	3.43372		-0.242738
20201226	0.215	0.00457056	-0.288287	-0.204083	0.00451873	0.0379194	-0.141385	-1.91498	-2.84096	1.69935	0.338547	3.43261		-0.487799
20201227	0.215	-0.00100162	-0.091894	-0.15564	0.00738077	0.0379673	-0.120684	-1.93171	-2.8402	1.7008	0.340088	3.4315		-0.248536
20201228	0.215	-0.44808	0.242949	-0.0745452	0.0149089	0.0382001	-0.100265	-1.94893	-2.83868	1.70224	0.341625	3.4304		-0.279676
20201229	1.97	0.933034	0.353155	0.00674262	0.0274925	0.03853	-0.0802403	-1.96661	-2.83642	1.70367	0.343159	3.42929		1.29293
20201230	0.42	-0.29212	0.0950748	0.0610213	0.0440387	0.0388838	-0.0607203	-1.98469	-2.83342	1.70508	0.34469	3.42818		-0.136024
20201231	0.42	-0.350153	-0.21262	0.0837163	0.0622028	0.0391615	-0.0418095	-2.00316	-2.82967	1.70648	0.346217	3.42707		-0.479057
20210101	0.37	0.0573809	-0.267818	0.0847303	0.0794602	0.0392511	-0.0236067	-2.02196	-2.82519	1.70786	0.34774	3.42596		-0.125707
20210102	0.325	-0.439203	-0.0357789	0.0756361	0.0934071	0.0390017	-0.00618796	-2.04108	-2.81998	1.70924	0.34926	3.42486		-0.399345
20210103	1.97	0.794327	0.214606	0.0535672	0.102198	0.0382941	0.0103849	-2.06046	-2.81403	1.7106	0.350777	3.42375		1.0625
20210104	1.16	-0.163971	0.23125	0.0167819	0.105538	0.0370476	0.0260608	-2.08008	-2.80735	1.71194	0.35229	3.42265		0.0840602
20210105	0.325	-0.311678	0.0305945	-0.0284035	0.103979	0.035261	0.0407983	-2.0999	-2.79995	1.71328	0.353799	3.42154		-0.309487
20210106	0.474	0.0475546	-0.213685	-0.0653755	0.0982239	0.0330578	0.0545613	-2.11988	-2.79183	1.7146	0.355305	3.42044		-0.231506
20210107	0.42	0.0609179	-0.349729	-0.0792306	0.0883189	0.0306059	0.0673172	-2.14	-2.78299	1.7159	0.356808	3.41933		-0.368042
20210108	0.325	-0.192128	-0.202295	-0.079826	0.0740084	0.0280851	0.0790311	-2.16021	-2.77344	1.7172	0.358307	3.41823		-0.474249
20210109	0.37	-0.428348	0.194374	-0.0781191	0.0544322	0.0256438	0.0896659	-2.18049	-2.76317	1.71848	0.359802	3.41713		-0.312093
20210110	2.08	1.03907	0.408319	-0.0766781	0.0289239	0.0233878	0.0991874	-2.2008	-2.75219	1.71974	0.361294	3.41603		1.37071
20210111	0.214	-0.463302	0.169305	-0.0703932	-0.00229905	0.0213659	0.107562	-2.2211	-2.74051	1.721	0.362782	3.41492		-0.36439
20210112	0.284	0.000343897	-0.242688	-0.0416585	-0.0380422	0.019534	0.114763	-2.24135	-2.72813	1.72223	0.364267	3.41382		-0.284002
20210113	0.247	-0.220371	-0.300791	0.0182824	-0.0766556	0.0178109	0.120769	-2.26153	-2.71504	1.72346	0.365748	3.41272		-0.502879
20210114	0.247	-0.398923	0.0628049	0.0986204	-0.116214	0.0161432	0.125563	-2.28158	-2.70127	1.72467	0.367225	3.41162		-0.237497
20210115	1.85	0.876137	0.402526	0.162426	-0.154441	0.0145496	0.129136	-2.30147	-2.6868	1.72586	0.368699	3.41052		1.44109
20210116	0.325	-0.548706	0.309028	0.179441	-0.189403	0.0131197	0.131455	-2.32116	-2.67165	1.72704	0.37017	3.40943		-0.0602372
20210117	0.215	-0.0496336	-0.0273346	0.147346	-0.219306	0.0119558	0.132477	-2.34062	-2.65581	1.72821	0.371636	3.40833		0.0703779
20210118	0.215	0.219697	-0.215797	0.0695008	-0.242048	0.0112208	0.132161	-2.35979	-2.63929	1.72936	0.373099	3.40723		0.0734005
20210119	0.247	0.0506592	-0.128672	-0.0401153	-0.255102	0.0111125	0.130464	-2.37864	-2.6221	1.73049	0.374559	3.40613		-0.118128
20210120	0.187	0.104396	0.0649124	-0.151144	-0.256836	0.0118174	0.12734	-2.39714	-2.60424	1.73161	0.376014	3.40503		0.0181651
20210121	0.215	-0.129416	0.0776651	-0.227456	-0.246553	0.0134368	0.122739	-2.41523	-2.58571	1.73272	0.377466	3.40394		-0.279208
20210122	0.247	0.107347	-0.10363	-0.248204	-0.224813	0.0160632	0.116606	-2.43288	-2.56652	1.7338	0.378915	3.40284		-0.244488
20210123	0.215	0.230693	-0.280823	-0.194866	-0.193782	0.0197625	0.108895	-2.45004	-2.54667	1.73488	0.380359	3.40175		-0.244996
20210124	0.215	-0.199444	-0.206941	-0.0731611	-0.157091	0.0245351	0.0995642	-2.46667	-2.52617	1.73594	0.3818	3.40065		-0.479545
20210125	0.284	-0.346938	0.0981875	0.0642153	-0.118816	0.0303645	0.0885818	-2.48272	-2.50503	1.73698	0.383237	3.39956		-0.184535
20210126	2.13	0.885643	0.298226	0.171544	-0.0824609	0.0371849	0.0759291	-2.49817	-2.48324	1.738	0.384671	3.39847		1.35541
20210127	0.474	-0.496967	0.244541	0.226027	-0.051712	0.0448206	0.0616082	-2.51297	-2.46081	1.73901	0.3861	3.39737		-0.0263993
20210128	0.42	-0.614177	0.127112	0.21223	-0.0300866	0.0531036	0.0456412	-2.52708	-2.43774	1.74	0.387526	3.39628		-0.274835
20210129	1.97	0.990443	0.0217622	0.146603	-0.0192947	0.0619347	0.0280626	-2.54047	-2.41405	1.74098	0.388949	3.39519		1.15881
20210130	0.325	-0.513274	-0.194804	0.0633723	-0.0200414	0.0713014	0.00891335	-2.5531	-2.38973	1.74194	0.390367	3.3941		-0.644705
20210131	0.284	0.103159	-0.383922	-0.00700938	-0.0325255	0.0813278	-0.011756	-2.56494	-2.3648	1.74288	0.391782	3.39301		-0.287772
20210201	0.14	-0.154178	-0.247603	-0.048116	-0.0558799	0.0922223	-0.0338856	-2.57596	-2.33925	1.74381	0.393193	3.39192		-0.449897
20210202	0.284	-0.455368	0.171807	-0.066782	-0.0883919	0.104272	-0.0574076	-2.58611	-2.31309	1.74472	0.3946	3.39083		-0.350343
20210203	1.91	0.938347	0.462849	-0.0694664	-0.127802	0.117807	-0.0822437	-2.59537	-2.28633	1.74561	0.396003	3.38974		1.33173
20210204	0.284	-0.450872	0.285956	-0.0526917	-0.170864	0.133036	-0.108307	-2.6037	-2.25898	1.74649	0.397402	3.38865		-0.217608
20210205	0.284	-0.165008	-0.143977	-0.0188734	-0.214343	0.150056	-0.135496	-2.61106	-2.23103	1.74734	0.398798	3.38756		-0.327859
20210206	0.214	0.0690238	-0.399882	0.0215623	-0.25589	0.168888	-0.163693	-2.6174	-2.2025	1.74818	0.40019	3.38647		-0.309296
20210207	0.215	-0.0377801	-0.235754	0.0575414	-0.293557	0.189425	-0.192763	-2.62269	-2.17339	1.749	0.401577	3.38538		-0.215992
20210208	0.284	-0.537172	0.255294	0.0638027	-0.325898	0.211526	-0.222553	-2.62689	-2.14371	1.74981	0.402961	3.3843		-0.218076
20210209	2.03	0.977309	0.495261	0.0282016	-0.351864	0.23504	-0.252887	-2.62996	-2.11347	1.75059	0.404342	3.38321		1.50077
20210210	0.325	-0.501213	0.170065	-0.0520575	-0.370709	0.259754	-0.28354	-2.63186	-2.08267	1.75136	0.405718	3.38213		-0.383205
20210211	0.284	-0.0395632	-0.251658	-0.148143	-0.381504	0.285302	-0.31426	-2.63257	-2.05132	1.75211	0.40709	3.38104		-0.439364
20210212	0.284	-0.0137204	-0.346213	-0.235259	-0.383278	0.31107	-0.34478	-2.63203	-2.01942	1.75284	0.408459	3.37996		-0.595193
20210213	0.247	0.0369704	-0.186528	-0.282477	-0.37609	0.336256	-0.374823	-2.63021	-1.98699	1.75355	0.409823	3.37887		-0.432035
20210214	0.247	0.112685	-0.0900701	-0.261268	-0.360664	0.359888	-0.404097	-2.62709	-1.95403	1.75425	0.411184	3.37779		-0.238653
20210215	0.247	-0.282737	-0.117822	-0.160747	-0.3382	0.38073	-0.432308	-2.62263	-1.92055	1.75492	0.41254	3.37671		-0.561306
20210216	0.863	0.317522	-0.00307069	-0.00163101	-0.310793	0.397436	-0.459145	-2.61679	-1.88656	1.75558	0.413893	3.37562		0.31282
20210217	0.789	-0.840983	0.27801	0.172024	-0.28126	0.408632	-0.484295	-2.60955	-1.85205	1.75622	0.415242	3.37454		-0.390949
20210218	2	0.392931	0.488801	0.304821	-0.251776	0.412891	-0.50744	-2.60088	-1.81705	1.75683	0.416587	3.37346		1.18655
20210219	2.03	0.778801	0.311559	0.358506	-0.224105	0.408828	-0.528291	-2.59076	-1.78156	1.75743	0.417927	3.37238		1.44887
20210220	0.37	-0.625552	-0.142128	0.329311	-0.199714	0.39503	-0.546604	-2.57916	-1.74558	1.75801	0.419264	3.3713		-0.438369
20210221	0.14	-0.762172	-0.275811	0.227755	-0.177857	0.370263	-0.562199	-2.56605	-1.70913	1.75857	0.420597	3.37022		-0.810228
20210222	1.97	0.826602	-0.0503999	0.0837693	-0.156217	0.333572	-0.574939	-2.55142	-1.67221	1.75911	0.421926	3.36914		0.859972
20210223	0.325	-0.101708	7.84648e-05	-0.0598636	-0.131667	0.284154	-0.584708	-2.53524	-1.63482	1.75963	0.423251	3.36806		-0.161493
20210224	0.284	-0.198914	-0.217051	-0.171746	-0.0991935	0.221394	-0.591411	-2.5175	-1.59699	1.76013	0.424572	3.36699		-0.587711
20210225	0.247	-0.0563013	-0.224043	-0.228882	-0.0535887	0.145075	-0.594984	-2.49819	-1.55871	1.7606	0.425888	3.36591		-0.509226
20210226	0.789	-0.310835	0.117087	-0.234778	0.00959685	0.0553294	-0.59541	-2.47731	-1.51999	1.76106	0.427201	3.36483		-0.428527
20210227	2	0.718589	0.397901	-0.213497	0.0920773	-0.0473463	-0.592704	-2.45484	-1.48084	1.7615	0.42851	3.36375		0.902993
20210228	0.789	-0.447171	0.228642	-0.18478	0.193548	-0.162298	-0.586901	-2.4308	-1.44127	1.76192	0.429814	3.36268		-0.403309
20210301	0.663	-0.22192	-0.0890344	-0.15161	0.31115	-0.288493	-0.578091	-2.40519	-1.40128	1.76231	0.431115	3.3616		-0.462564
20210302	1.09	0.0515094	-0.226763	-0.112282	0.439326	-0.424502	-0.566425	-2.37802	-1.36089	1.76269	0.432411	3.36053		-0.287536
20210303	1.57	0.174701	-0.218941	-0.0659936	0.569803	-0.568389	-0.552102	-2.3493	-1.32011	1.76304	0.433704	3.35945		-0.110233
20210304	1.46	0.180411	-0.122353	-0.0206403	0.692721	-0.717795	-0.535344	-2.31904	-1.27894	1.76338	0.434992	3.35838		0.0374179
20210305	0.596	-0.75134	0.072573	0.00732689	0.79836	-0.869974	-0.516401	-2.28726	-1.23738	1.76369	0.436276	3.35731		-0.67144
20210306	2.08	0.558569	0.20572	0.00724874	0.878039	-1.02193	-0.495541	-2.25397	-1.19546	1.76398	0.437556	3.35623		0.771537
20210307	2.03	0.427729	0.0824447	-0.0137432	0.92376	-1.17046	-0.473038	-2.21917	-1.15318	1.76425	0.438832	3.35516		0.496431
20210308	0.596	-0.594316	-0.163477	-0.0377589	0.928019	-1.31222	-0.449171	-2.1829	-1.11054	1.76449	0.440104	3.35409		-0.795552
20210309	0.789	-0.280737	-0.0975675	-0.0630175	0.885303	-1.44343	-0.424233	-2.14518	-1.06756	1.76472	0.441371	3.35302		-0.441323
20210310	2.13	0.704486	0.218245	-0.093182	0.792272	-1.56037	-0.398543	-2.10601	-1.02424	1.76492	0.442635	3.35195		0.829549
20210311	1.57	0.336045	0.261085	-0.122741	0.648279	-1.65954	-0.372428	-2.06544	-0.980598	1.7651	0.443894	3.35088		0.474388
20210312	0.474	-0.406185	-0.076387	-0.133566	0.456542	-1.73761	-0.346213	-2.02349	-0.936638	1.76526	0.445149	3.34981		-0.616138
20210313	0.474	0.117463	-0.354116	-0.0961547	0.221195	-1.79104	-0.320223	-1.98017	-0.892372	1.76539	0.4464	3.34874		-0.332808
20210314	0.37	-0.108528	-0.202144	0.00968942	-0.0540279	-1.81631	-0.294764	-1.93552	-0.847807	1.76551	0.447647	3.34767		-0.300982
20210315	0.284	-0.401487	0.231873	0.17335	-0.365693	-1.81002	-0.270144	-1.88957	-0.802954	1.7656	0.448889	3.3466		0.00373516
20210316	2.08	0.7872	0.402196	0.364007	-0.709664	-1.76883	-0.246655	-1.84234	-0.757822	1.76567	0.450127	3.34554		1.5534
20210317	0.42	-0.49384	0.153169	0.555404	-1.08068	-1.68997	-0.224569	-1.79387	-0.71242	1.76571	0.451361	3.34447		0.214733
20210318	0.37	-0.2281	-0.190607	0.746653	-1.47055	-1.57168	-0.20413	-1.74419	-0.66676	1.76573	0.452591	3.3434		0.327946
20210319	0.789	0.452526	-0.357346	0.948131	-1.86523	-1.41325	-0.185563	-1.69332	-0.620849	1.76573	0.453816	3.34234		1.04331
20210320	0.789	0.187977	-0.316341	1.15489	-2.24343	-1.21492	-0.169075	-1.64131	-0.5747	1.76571	0.455038	3.34127		1.02652
20210321	0.42	-0.883044	-0.041051	1.32981	-2.57676	-0.977783	-0.15486	-1.58817	-0.528321	1.76566	0.456255	3.34021		0.405717
20210322	2.9	1.03412	0.424945	1.36941	-2.83023	-0.704008	-0.143109	-1.53395	-0.481722	1.76559	0.457467	3.33914		2.82848
20210323	1.23	-0.665639	0.68584	1.12317	-2.96489	-0.397098	-0.134006	-1.47868	-0.434914	1.76549	0.458676	3.33808		1.14337
20210324	2.05	0.71466	0.56815	0.473509	-2.94776	-0.0618527	-0.127734	-1.4224	-0.387907	1.76537	0.45988	3.33702		1.75632
20210325	0.863	-0.486541	0.450009	-0.590884	-2.76189	0.295549	-0.124467	-1.36515	-0.34071	1.76523	0.461079	3.33595		-0.627417
20210326	0.474	-0.225914	0.765247	-1.92985	-2.40379	0.667786	-0.124369	-1.30696	-0.293334	1.76506	0.462275	3.33489		-1.39052
20210327	2.05	0.812915	1.13914	-3.19338	-1.8818	1.04665	-0.127596	-1.24788	-0.245789	1.76487	0.463466	3.33383		-1.24133
20210328	0.863	-0.00776642	0.454061	-3.91603	-1.21053	1.42329	-0.134296	-1.18796	-0.198085	1.76465	0.464653	3.33277		-3.46973
20210329	0.596	0.933312	-1.74774	-3.76396	-0.413666	1.78855	-0.144616	-1.12722	-0.150232	1.76441	0.465835	3.33171		-4.57838
20210330	2.08	2.09521	-4.14668	-2.68916	0.467041	2.13323	-0.158698	-1.06574	-0.10224	1.76414	0.467013	3.33065		-4.74064
20210331	2.62	-0.485744	-4.01198	-0.861841	1.37105	2.44813	-0.176683	-1.00355	-0.0541185	1.76385	0.468187	3.32959		-5.35957
20210401	2.03	-8.25595	-0.406784	1.31266	2.23289	2.72405	-0.198706	-0.940712	-0.00587874	1.76354	0.469356	3.32853		-7.35007
20210402	18.1	0.15383	4.31152	3.29198	2.98682	2.95179	-0.224899	-0.87728	0.0424698	1.76319	0.470521	3.32747		7.75732
20210403	32.4	10.9121	6.09934	4.51313	3.56741	3.12213	-0.255376	-0.813312	0.090917	1.76283	0.471681	3.32641		21.5245
20210404	9	-9.72937	2.42955	4.587	3.91459	3.22619	-0.290221	-0.748866	0.139453	1.76244	0.472838	3.32536		-2.71283
20210405	5.26	-8.45773	-2.16961	3.77604	3.99742	3.25777	-0.329438	-0.684003	0.188067	1.76202	0.473989	3.3243		-6.8513
20210406	3.78	-7.22119	-3.20185	2.43843	3.83906	3.21688	-0.372873	-0.618783	0.23675	1.76158	0.475136	3.32324		-7.98462
20210407	16.3	6.26112	-1.92298	0.829556	3.48051	3.10744	-0.420075	-0.553268	0.285491	1.76111	0.476279	3.32219		5.1677
20210408	14.6	5.09779	-0.568181	-0.795979	2.967	2.93404	-0.470379	-0.487522	0.334281	1.76061	0.477417	3.32113		3.73363
20210409	8.12	0.59587	-0.0531453	-2.19092	2.34656	2.70159	-0.523059	-0.421609	0.383109	1.76009	0.478551	3.32008		-1.64819
20210410	5.26	-0.620089	-0.179794	-3.21452	1.66845	2.41535	-0.577379	-0.355596	0.431965	1.75955	0.479681	3.31902		-4.0144
20210411	2.28	-1.66312	-0.217229	-3.81257	0.981493	2.08073	-0.6326	-0.289552	0.480839	1.75897	0.480806	3.31797		-5.69292
20210412	3.55	0.302826	0.0420425	-3.97511	0.330861	1.70323	-0.687986	-0.223544	0.529722	1.75837	0.481926	3.31692		-3.63025
20210413	2.96	0.350621	0.284005	-3.73319	-0.240827	1.28836	-0.742806	-0.157642	0.578603	1.75775	0.483042	3.31587		-3.09856
20210414	2.49	0.120078	0.017704	-3.15578	-0.695047	0.841787	-0.796329	-0.0919151	0.627472	1.75709	0.484153	3.31481		-3.018
20210415	2.38	0.826496	-0.665622	-2.38006	-1.00372	0.369794	-0.847828	-0.0264297	0.676319	1.75641	0.48526	3.31376		-2.21919
20210416	0.596	-1.4881	-0.860013	-1.57605	-1.15405	-0.12016	-0.896576	0.0387474	0.725134	1.75571	0.486362	3.31271		-3.92416
20210417	3.33	0.179017	0.0248939	-0.885716	-1.14645	-0.618973	-0.941844	0.103551	0.773907	1.75497	0.48746	3.31166		-0.681806
20210418	5.26	1.0662	1.13035	-0.381244	-0.997441	-1.11591	-0.982904	0.167916	0.822628	1.75421	0.488554	3.31061		1.81531
20210419	4.32	-0.302399	1.3573	-0.0577133	-0.739902	-1.59943	-1.01903	0.231778	0.871288	1.75343	0.489642	3.30956		0.997184
20210420	3.78	-0.0260479	0.61887	0.178418	-0.424242	-2.05758	-1.04948	0.295077	0.919875	1.75261	0.490726	3.30851		0.77124
20210421	2.62	-0.503246	-0.507041	0.48085	-0.113639	-2.47837	-1.07355	0.357758	0.96838	1.75177	0.491806	3.30747		-0.529437
20210422	3.78	1.28719	-1.61363	1.01532	0.1302	-2.8502	-1.09049	0.419769	1.01679	1.75089	0.492881	3.30642		0.688879
20210423	2.9	0.409685	-1.85084	1.88127	0.260433	-3.16234	-1.09959	0.481061	1.0651	1.75	0.493951	3.30537		0.440113
20210424	2.49	-2.96772	-0.513582	3.01223	0.244488	-3.40584	-1.10018	0.54159	1.1133	1.74907	0.495017	3.30432		-0.469071
20210425	11.4	3.04214	1.53811	4.18047	0.0566438	-3.57405	-1.09161	0.601317	1.16137	1.74811	0.496078	3.30328		8.76072
20210426	8.56	-0.437565	1.69149	5.10899	-0.324048	-3.66294	-1.0734	0.660204	1.20931	1.74713	0.497134	3.30223		6.36291
20210427	6.49	-1.18676	0.0551173	5.57265	-0.903195	-3.67215	-1.04524	0.718221	1.25711	1.74612	0.498186	3.30119		4.441
20210428	4.61	-0.57888	-1.63463	5.55886	-1.65816	-3.60602	-1.00716	0.775343	1.30475	1.74508	0.499233	3.30014		3.34535
20210429	4.04	0.131617	-2.25087	5.1539	-2.55216	-3.47162	-0.959439	0.831554	1.35223	1.74401	0.500276	3.2991		3.03465
20210430	2.96	0.248599	-1.90049	4.46424	-3.53782	-3.27671	-0.902438	0.886841	1.39953	1.74291	0.501314	3.29806		2.81235
20210501	2.03	-0.213738	-1.16396	3.58836	-4.54287	-3.02928	-0.836566	0.941193	1.44665	1.74178	0.502347	3.29701		2.21066
20210502	1.78	0.722433	-0.252666	2.53794	-5.46391	-2.73755	-0.762248	0.994604	1.49357	1.74063	0.503375	3.29597		3.00771
20210503	0.474	-0.691947	1.14394	1.23478	-6.18265	-2.40995	-0.67993	1.04707	1.54029	1.73944	0.504399	3.29493		1.68677
20210504	2.28	-0.0613653	3.36941	-0.387414	-6.58387	-2.05517	-0.590082	1.09859	1.58678	1.73823	0.505418	3.29389		2.92063
20210505	2.96	0.0454073	6.09149	-2.32742	-6.56626	-1.68184	-0.493196	1.14916	1.63305	1.73698	0.506432	3.29285		3.80948
20210506	3.78	-0.299489	8.34293	-4.56792	-6.04572	-1.29817	-0.389785	1.19877	1.67908	1.73571	0.507442	3.29181		3.47552
20210507	4.62	0.461038	9.051	-7.03125	-4.98707	-0.911582	-0.280385	1.24744	1.72485	1.73441	0.508447	3.29077		2.4808
20210508	3.14	0.488002	7.41684	-9.37574	-3.41898	-0.528277	-0.165545	1.29516	1.77037	1.73308	0.509447	3.28973		-1.47089
20210509	2.49	2.24959	3.72449	-10.8765	-1.42632	-0.15418	-0.0458417	1.34193	1.8156	1.73171	0.510442	3.28869		-4.90247
20210510	2.11	5.13368	-2.23488	-10.5935	0.870365	0.204787	0.0781377	1.38775	1.86056	1.73032	0.511433	3.28765		-7.69467
20210511	2	7.99405	-11.1261	-7.80115	3.32025	0.542704	0.205803	1.43263	1.90521	1.7289	0.512418	3.28661		-10.9332
20210512	12.9	16.3505	-16.7957	-2.65144	5.74447	0.853659	0.336557	1.47655	1.94956	1.72744	0.513399	3.28558		-3.0967
20210513	4.61	-9.57236	-8.41197	3.88017	7.95173	1.13175	0.469786	1.51953	1.9936	1.72596	0.514376	3.28454		-14.1042
20210514	6.88	-31.3694	7.44766	10.0764	9.74893	1.37111	0.604863	1.56155	2.0373	1.72445	0.515347	3.2835		-13.8453
20210515	90	35.153	18.4402	14.0625	10.9431	1.56591	0.741135	1.60262	2.08066	1.7229	0.516314	3.28247		67.6557
20210516	15.7	-35.0572	13.4581	14.4661	11.3525	1.71101	0.877919	1.64274	2.12367	1.72133	0.517275	3.28143		-7.133
20210517	6.88	-29.4907	1.76463	11.9167	10.8855	1.80442	1.01445	1.68191	2.16631	1.71972	0.518232	3.2804		-15.8094
20210518	4.04	-17.7887	-7.72923	7.4972	9.64657	1.84968	1.14988	1.72012	2.20858	1.71808	0.519184	3.27936		-18.0207
20210519	3.14	-8.55173	-11.2463	2.26326	7.78919	1.85274	1.28333	1.75738	2.25047	1.71642	0.520131	3.27833		-17.5348
20210520	18.1	12.8144	-9.96812	-2.77015	5.46797	1.81995	1.4139	1.7937	2.29196	1.71472	0.521074	3.2773		0.0761322
20210521	2.28	-1.95123	-5.03301	-6.6761	2.83736	1.75777	1.5407	1.82908	2.33304	1.71299	0.522011	3.27627		-13.6603
20210522	0.863	-2.10303	-1.09447	-8.84631	0.0501506	1.67266	1.66286	1.86352	2.37371	1.71123	0.522944	3.27523		-12.0438
20210523	1.97	0.121719	0.0704646	-9.01528	-2.7425	1.57114	1.77955	1.89704	2.41395	1.70943	0.523871	3.2742		-8.82309
20210524	0.474	0.176789	0.0321621	-7.55166	-5.40645	1.45997	1.88991	1.92963	2.45375	1.70761	0.524794	3.27317		-7.34271
20210525	0.42	-0.664031	0.426661	-5.25147	-7.82175	1.34646	1.99312	1.9613	2.49311	1.70575	0.525712	3.27214		-5.48884
20210526	2.49	0.336451	1.56754	-2.91853	-9.87785	1.23834	2.08839	1.99205	2.532	1.70386	0.526624	3.27111		-1.01454
20210527	2.75	-0.0799803	2.31628	-1.13706	-11.4739	1.14338	2.17493	2.0219	2.57042	1.70194	0.527532	3.27008		1.09923
20210528	2.19	-0.740136	2.0211	-0.233848	-12.5257	1.06915	2.25196	2.05085	2.60837	1.69999	0.528435	3.26905		1.04711
20210529	2.13	0.901692	1.21953	-0.240057	-12.9955	1.02169	2.31875	2.0789	2.64582	1.698	0.529333	3.26803		1.88117
20210530	0.474	-0.278958	0.845269	-0.969008	-12.9027	1.00334	2.37459	2.10607	2.68277	1.69598	0.530226	3.267		-0.402696
20210531	0.37	-0.518982	1.32601	-2.17609	-12.2901	1.01306	2.41887	2.13236	2.71921	1.69393	0.531114	3.26597		-1.36905
20210601	1.71	0.987317	1.85568	-3.51703	-11.2147	1.04777	2.45108	2.1578	2.75514	1.69185	0.531997	3.26495		-0.674033
20210602	0.284	-0.586571	0.805504	-4.5579	-9.73705	1.1032	2.47081	2.18238	2.79053	1.68974	0.532875	3.26392		-4.33896
20210603	0.325	0.671621	-1.57464	-4.93718	-7.91817	1.17451	2.47777	2.20613	2.82538	1.68759	0.533749	3.26289		-5.84021
20210604	2.08	0.434733	-2.18994	-4.45804	-5.81585	1.25678	2.47173	2.22907	2.85968	1.68541	0.534617	3.26187		-6.21325
20210605	1.57	-6.48905	0.540873	-3.31003	-3.47906	1.34532	2.45257	2.25121	2.89343	1.68319	0.53548	3.26084		-9.2582
20210606	21.9	8.16074	2.43468	-2.18337	-0.942874	1.43546	2.42019	2.27258	2.9266	1.68095	0.536337	3.25982		8.41205
20210607	7.29	-7.81561	0.52108	-1.70578	1.74799	1.52251	2.37458	2.2932	2.9592	1.67867	0.53719	3.2588		-9.00031
20210608	9.46	-7.00258	-1.17265	-1.84594	4.48733	1.60167	2.31577	2.31308	2.99121	1.67635	0.538038	3.25778		-10.0212
20210609	24.6	5.91296	-0.895898	-2.15003	7.11852	1.66813	2.24388	2.33226	3.02263	1.674	0.538881	3.25675		2.86703
20210610	18.1	-3.82179	-0.267827	-1.8124	9.4691	1.71703	2.15907	2.35076	3.05344	1.67162	0.539719	3.25573		-5.90202
20210611	26.8	1.70544	-0.770264	-0.120927	11.3966	1.74353	2.06156	2.3686	3.08364	1.66921	0.540551	3.25471		0.814254
20210612	26.8	-0.545981	-3.184	3.00883	12.7993	1.74279	1.95168	2.38582	3.11322	1.66676	0.541379	3.25369		-0.721145
20210613	33.1	4.90498	-6.53653	6.78626	13.5916	1.71016	1.82986	2.40244	3.14218	1.66428	0.542201	3.25267		5.15471
20210614	36	2.30018	-4.07686	9.90906	13.6925	1.64232	1.69668	2.41848	3.17049	1.66176	0.543018	3.25165		8.13238
20210615	30	-13.4883	4.89475	11.3955	13.0288	1.53941	1.55272	2.43397	3.19817	1.65921	0.54383	3.25063		2.80192
20210616	63.1	15.9938	11.1665	10.3667	11.5777	1.40641	1.39865	2.44893	3.22519	1.65663	0.544637	3.24961		37.5269
20210617	26	-8.66784	5.54145	6.28511	9.47697	1.24948	1.23514	2.46339	3.25156	1.65401	0.545439	3.24859		3.15872
20210618	0.119	-15.471	-5.1166	0.394697	6.92368	1.07467	1.06291	2.47736	3.27726	1.65136	0.546236	3.24758		-20.1929
20210619	0.2965	-0.00689743	-11.1941	-5.61311	4.1205	0.888012	0.882672	2.49088	3.30229	1.64867	0.547027	3.24656		-16.8141
20210620	0.474	6.89414	-9.74818	-10.2009	1.27014	0.695443	0.695136	2.50396	3.32664	1.64595	0.547814	3.24554		-13.055
20210621	0.325	5.95381	-3.71499	-12.5375	-1.42754	0.502843	0.501021	2.51662	3.3503	1.64319	0.548595	3.24453		-10.2987
20210622	0.325	2.64191	2.18211	-12.6519	-3.79633	0.316005	0.301049	2.5289	3.37328	1.6404	0.549371	3.24351		-7.82792
20210623	0.325	0.14577	5.31847	-10.9699	-5.72563	0.140627	0.095957	2.54081	3.39555	1.63757	0.550142	3.2425		-5.50565
20210624	1.97	0.537336	5.11179	-8.00772	-7.18249	-0.0178306	-0.113511	2.55236	3.41713	1.63471	0.550907	3.24148		-2.35859
20210625	0.284	-0.929675	2.76131	-4.37656	-8.17912	-0.155099	-0.326599	2.56359	3.438	1.63182	0.551667	3.24047		-2.54492
20210626	3.33	1.73595	0.759336	-0.792885	-8.75721	-0.268629	-0.54253	2.57449	3.45815	1.62888	0.552422	3.23946		1.7024
20210627	2.13	-2.21835	0.650001	2.20076	-8.96798	-0.356547	-0.760498	2.58508	3.47758	1.62592	0.553172	3.23844		0.632415
20210628	3.33	-3.9786	1.44288	4.53635	-8.86885	-0.417191	-0.979668	2.59538	3.49629	1.62292	0.553917	3.23743		2.00064
20210629	16.3	7.02137	1.42413	6.42241	-8.52897	-0.448931	-1.19916	2.60541	3.51426	1.61988	0.554656	3.23642		14.8679
20210630	6.11	-3.40179	-0.137668	8.06492	-8.02374	-0.450014	-1.41802	2.61517	3.5315	1.61681	0.55539	3.23541		4.52546
20210701	3.14	-6.95634	-1.60067	9.5927	-7.42091	-0.418446	-1.63527	2.62469	3.548	1.6137	0.556119	3.2344		1.03569
20210702	2.9	-9.94798	-0.525446	10.9448	-6.7681	-0.351871	-1.84983	2.63397	3.56375	1.61056	0.556842	3.23339		0.47133
20210703	26.8	10.0674	1.64339	11.6625	-6.08343	-0.248459	-2.06053	2.64303	3.57875	1.60738	0.55756	3.23238		23.3733
20210704	6.88	-9.13454	0.761106	11.2764	-5.37357	-0.108767	-2.26617	2.65188	3.593	1.60417	0.558273	3.23137		2.903
20210705	20.6	7.54453	-1.58095	9.80213	-4.65368	0.062774	-2.46547	2.66054	3.60648	1.60092	0.558981	3.23036		15.7657
20210706	14	2.88784	-1.59672	7.52529	-3.94877	0.256766	-2.6572	2.66903	3.6192	1.59764	0.559683	3.22935		8.81642
20210707	5.74	-5.34013	0.395207	4.72665	-3.26084	0.460823	-2.84014	2.67735	3.63115	1.59432	0.56038	3.22835		-0.218277
20210708	11.4	0.0621172	2.82018	1.63444	-2.54519	0.66196	-3.01311	2.68552	3.64233	1.59096	0.561071	3.22734		4.51673
20210709	14.6	3.9909	4.60846	-1.57488	-1.73804	0.847063	-3.17493	2.69356	3.65274	1.58757	0.561757	3.22633		7.02448
20210710	7.29	-1.953	5.22051	-4.82766	-0.792716	1.00307	-3.32446	2.70148	3.66236	1.58414	0.562438	3.22533		-1.56015
20210711	4.61	-2.35281	5.31936	-7.99562	0.294129	1.11734	-3.46057	2.70928	3.6712	1.58068	0.563113	3.22432		-5.02906
20210712	7.7	2.13918	5.23424	-10.4769	1.50334	1.17911	-3.58215	2.717	3.67926	1.57718	0.563783	3.22332		-3.10352
20210713	11.4	7.88542	2.70048	-11.4295	2.80554	1.18304	-3.68814	2.72465	3.68653	1.57365	0.564448	3.22231		-0.843615
20210714	4.32	6.45471	-4.95868	-10.2549	4.16298	1.12707	-3.77761	2.73223	3.69301	1.57008	0.565107	3.22131		-8.75886
20210715	2.9	10.9762	-15.2715	-7.1152	5.49625	1.01011	-3.84984	2.73975	3.6987	1.56647	0.565761	3.22031		-11.4105
20210716	2.49	9.68934	-20.4961	-2.38499	6.69266	0.83109	-3.90426	2.74724	3.7036	1.56283	0.566409	3.2193		-13.1917
20210717	6.49	-0.614059	-11.8875	3.13827	7.63207	0.588916	-3.94052	2.75469	3.70771	1.55915	0.567052	3.2183		-9.36327
20210718	3.78	-31.2479	10.4168	8.09551	8.19136	0.282888	-3.95843	2.76209	3.71103	1.55544	0.56769	3.2173		-12.7356
20210719	88	34.6439	26.0014	10.9188	8.24749	-0.0860051	-3.95799	2.76944	3.71355	1.55169	0.568322	3.2163		71.5641
20210720	8.12	-35.336	17.7773	10.471	7.71681	-0.514044	-3.93931	2.77673	3.71528	1.54791	0.568948	3.2153		-7.08783
20210721	6.11	-14.4327	-0.269484	7.46424	6.65711	-0.992757	-3.90252	2.78391	3.71622	1.54409	0.569569	3.2143		-7.23796
20210722	4.61	3.45593	-13.8886	3.0925	5.18851	-1.50936	-3.84773	2.79097	3.71637	1.54024	0.570185	3.2133		-7.3402
20210723	4.04	14.4879	-18.3182	-1.47347	3.44233	-2.04947	-3.77507	2.79785	3.71574	1.53635	0.570795	3.2123		-5.30377
20210724	3.14	15.2829	-14.3882	-5.21144	1.55208	-2.59839	-3.68467	2.8045	3.71432	1.53243	0.5714	3.2113		-4.31672
20210725	0.789	9.31201	-6.16855	-7.40884	-0.349246	-3.1414	-3.57666	2.81085	3.71212	1.52847	0.571999	3.2103		-4.26538
20210726	0.937	4.60195	1.57542	-7.77719	-2.13687	-3.66368	-3.45121	2.81684	3.70913	1.52448	0.572593	3.20931		-1.59982
20210727	0.863	0.17231	6.54633	-6.46365	-3.71218	-4.14972	-3.30852	2.82241	3.70537	1.52045	0.573181	3.20831		0.254987
20210728	2.96	0.110811	8.20747	-4.00186	-5.00736	-4.58282	-3.14882	2.82748	3.70084	1.51639	0.573764	3.20731		4.31643
20210729	4.61	0.993902	6.61736	-1.05701	-5.97527	-4.94561	-2.97238	2.832	3.69553	1.5123	0.574341	3.20632		6.55426
20210730	1.31	-1.14248	3.59112	1.60338	-6.58601	-5.22024	-2.77948	2.83588	3.68945	1.50817	0.574912	3.20532		4.05201
20210731	1.01	-0.603858	1.29666	3.3278	-6.82831	-5.38983	-2.57048	2.83907	3.68261	1.50401	0.575478	3.20433		4.0206
20210801	2	0.774783	0.336135	3.72334	-6.71108	-5.44297	-2.3459	2.84148	3.675	1.49981	0.576039	3.20333		4.83426
20210802	0.663	-0.454673	0.223347	2.82033	-6.25636	-5.37768	-2.10652	2.84306	3.66664	1.49558	0.576594	3.20234		2.58901
20210803	0.596	-0.299635	0.76618	0.891167	-5.49855	-5.19832	-1.8535	2.84372	3.65752	1.49132	0.577143	3.20135		1.35771
20210804	0.474	0.00338242	1.6632	-1.57331	-4.49614	-4.91152	-1.5883	2.84341	3.64765	1.48703	0.577687	3.20035		0.0932719
20210805	0.37	0.285035	1.96854	-4.02075	-3.3224	-4.52478	-1.31256	2.84204	3.63704	1.4827	0.578225	3.19936		-1.76717
20210806	0.474	1.07572	0.513492	-5.95225	-2.06626	-4.04648	-1.028	2.83955	3.62568	1.47834	0.578757	3.19837		-4.36303
20210807	0.325	4.02179	-3.18117	-6.83717	-0.833636	-3.48621	-0.736399	2.83587	3.61359	1.47395	0.579284	3.19738		-5.99655
20210808	0.325	5.19062	-7.11389	-6.11673	0.276819	-2.85457	-0.439536	2.83092	3.60077	1.46952	0.579805	3.19639		-8.04
20210809	9	10.7484	-8.67528	-3.29234	1.1935	-2.1633	-0.139197	2.82463	3.58722	1.46506	0.580321	3.1954		-1.21922
20210810	9.46	6.52723	-10.9409	1.78009	1.88182	-1.42544	0.162829	2.81694	3.57295	1.46058	0.580831	3.19441		-2.63354
20210811	20	8.03225	-9.64262	7.93477	2.33325	-0.655823	0.464754	2.80776	3.55796	1.45606	0.581335	3.19342		6.32439
20210812	6.88	-29.5434	8.00836	13.2797	2.54482	0.129132	0.764786	2.79703	3.54227	1.45151	0.581834	3.19243		-8.25531
20210813	94.9	36.4598	26.3206	16.0179	2.51514	0.912156	1.06113	2.78467	3.52587	1.44692	0.582327	3.19144		78.7983
20210814	15.7	-41.1079	25.2004	14.8088	2.25417	1.67648	1.35201	2.77061	3.50878	1.44231	0.582814	3.19046		-1.09863
20210815	7.7	-32.3151	12.7342	10.0212	1.81833	2.4061	1.63561	2.75478	3.49101	1.43766	0.583296	3.18947		-9.55973
20210816	4.61	-14.0374	-2.02985	2.80431	1.29685	3.0858	1.91016	2.73711	3.47255	1.43299	0.583772	3.18848		-13.263
20210817	3.33	4.31239	-13.7496	-5.59039	0.783717	3.70197	2.17385	2.71751	3.45343	1.42828	0.584242	3.1875		-15.0276
20210818	2.9	17.8141	-19.6247	-13.8188	0.372838	4.24223	2.4249	2.69593	3.43364	1.42355	0.584707	3.18651		-15.6293
20210819	2.13	24.1903	-20.9689	-20.2667	0.157241	4.69597	2.66152	2.67229	3.41319	1.41878	0.585166	3.18553		-17.0454
20210820	0.863	27.1156	-22.4371	-23.2801	0.224258	5.05626	2.88199	2.64652	3.3921	1.41399	0.585619	3.18454		-18.6015
20210821	0.937	29.1449	-26.9632	-21.7486	0.621013	5.32147	3.08473	2.61856	3.37037	1.40916	0.586066	3.18356		-19.5669
20210822	0.789	27.8809	-31.6021	-16.0898	1.2825	5.49362	3.26839	2.58834	3.34801	1.40431	0.586508	3.18258		-19.811
20210823	9.46	24.3502	-29.3167	-7.66085	2.09743	5.576	3.43207	2.5558	3.32504	1.39943	0.586943	3.18159		-12.6273
20210824	23.9	11.3536	-12.4776	1.94679	2.95021	5.57263	3.57518	2.52088	3.30145	1.39451	0.587374	3.18061		0.822732
20210825	9.46	-43.1735	17.6843	11.1619	3.72513	5.48791	3.69732	2.48353	3.27727	1.38957	0.587798	3.17963		-14.3273
20210826	129	45.012	41.1338	18.4112	4.30634	5.32666	3.79836	2.44371	3.25249	1.3846	0.588216	3.17865		104.557
20210827	114	27.0229	40.4473	22.2586	4.57845	5.09398	3.87844	2.4014	3.22713	1.3796	0.588629	3.17767		89.7287
20210828	26.8	-43.2283	24.1824	22.1347	4.45154	4.79613	3.93785	2.35659	3.20121	1.37457	0.589036	3.17669		3.08879
20210829	18.1	-28.329	4.74499	18.8055	3.93849	4.44183	3.97696	2.30927	3.17473	1.36952	0.589437	3.17571		-4.77846
20210830	16.3	-7.23482	-11.3956	13.3064	3.10614	4.0412	3.9962	2.25948	3.1477	1.36444	0.589832	3.17473		-5.32392
20210831	6.49	0.132563	-20.3804	6.67813	2.03015	3.60383	3.99609	2.20723	3.12013	1.35933	0.590222	3.17375		-13.5697
20210901	5.74	10.1371	-22.6528	0.00846456	0.787203	3.13921	3.97723	2.15258	3.09204	1.35419	0.590605	3.17278		-12.5073
20210902	4.61	12.9238	-19.1223	-5.69614	-0.545144	2.657	3.94024	2.09557	3.06344	1.34902	0.590983	3.1718		-11.8947
20210903	4.04	11.5034	-11.9187	-9.76794	-1.88794	2.16705	3.88581	2.03626	3.03434	1.34383	0.591355	3.17082		-10.1832
20210904	3.55	7.28182	-4.22912	-11.9234	-3.15817	1.67915	3.81459	1.97472	3.00474	1.33861	0.591721	3.16985		-8.87072
20210905	2.75	2.53801	1.84018	-12.1828	-4.2649	1.20272	3.7273	1.911	2.97466	1.33336	0.592081	3.16887		-7.80457
20210906	1.16	-2.65006	5.89574	-10.9507	-5.11455	0.746868	3.62468	1.84519	2.94411	1.32809	0.592436	3.16789		-7.70506
20210907	9	2.78177	6.97398	-8.78016	-5.62067	0.320181	3.50749	1.77735	2.9131	1.32279	0.592784	3.16692		0.975595
20210908	5.26	-0.315153	4.23509	-6.1623	-5.71435	-0.0694126	3.37654	1.70756	2.88165	1.31746	0.593126	3.16595		-2.24236
20210909	3.33	0.559697	-0.0726158	-3.72606	-5.36836	-0.41621	3.23266	1.6359	2.84975	1.31211	0.593463	3.16497		-3.23898
20210910	2.75	-0.797791	-1.54311	-2.11147	-4.58629	-0.71863	3.07677	1.56245	2.81743	1.30674	0.593794	3.164		-4.45237
20210911	2.62	-5.45651	1.83379	-1.68989	-3.39084	-0.979138	2.90983	1.48728	2.78469	1.30133	0.594118	3.16303		-5.31262
20210912	18.1	5.33052	5.84454	-2.0298	-1.86619	-1.20141	2.7329	1.41048	2.75155	1.2959	0.594437	3.16205		9.14527
20210913	7.29	-3.54527	3.49175	-2.47476	-0.168946	-1.38931	2.54713	1.33212	2.71801	1.29045	0.59475	3.16108		-2.52827
20210914	3.78	-2.00255	-2.55145	-2.52517	1.53145	-1.54681	2.35373	1.25228	2.68409	1.28497	0.595057	3.16011		-7.07917
20210915	3.14	-0.219582	-7.27404	-1.81143	3.08144	-1.67798	2.15394	1.17105	2.6498	1.27947	0.595358	3.15914		-9.30505
20210916	2.62	-2.21939	-8.20284	-0.121787	4.35843	-1.78698	1.94903	1.0885	2.61514	1.27394	0.595653	3.15817		-10.544
20210917	18.7	8.55508	-5.84586	2.22385	5.28716	-1.87805	1.74029	1.00473	2.58013	1.26839	0.595942	3.1572		4.93307
20210918	8.56	-12.3112	2.6068	4.47723	5.80957	-1.95551	1.529	0.919797	2.54478	1.26281	0.596225	3.15623		-5.22715
20210919	45.1	15.0745	10.5291	5.81318	5.87322	-2.02343	1.31646	0.833798	2.5091	1.25721	0.596502	3.15527		31.4167
20210920	11.4	-15.6766	8.76024	5.61147	5.45782	-2.08444	1.10394	0.746811	2.47309	1.25159	0.596773	3.1543		-1.30489
20210921	5.74	-11.9728	1.99102	4.14862	4.62242	-2.13929	0.892681	0.658917	2.43678	1.24594	0.597038	3.15333		-5.8332
20210922	4.04	-3.54991	-4.3056	2.00851	3.47522	-2.18831	0.683872	0.570198	2.40017	1.24027	0.597297	3.15236		-5.84699
20210923	3.14	2.33081	-7.07633	-0.21508	2.13336	-2.23161	0.478556	0.480736	2.36327	1.23458	0.59755	3.1514		-4.96059
20210924	2.62	4.28354	-6.10008	-1.99869	0.713419	-2.26911	0.27764	0.390611	2.3261	1.22886	0.597797	3.15043		-3.81523
20210925	1.23	2.23364	-3.02014	-3.01813	-0.673129	-2.30053	0.0819763	0.299907	2.28865	1.22312	0.598037	3.14947		-3.80463
20210926	1.23	1.35905	-0.0722029	-3.20888	-1.92877	-2.32566	-0.107594	0.208703	2.25095	1.21736	0.598272	3.1485		-1.92203
20210927	0.937	0.344068	1.67726	-2.68086	-2.98254	-2.34433	-0.290254	0.117083	2.21301	1.21157	0.598501	3.14754		-0.659532
20210928	1.01	0.206835	2.10457	-1.66981	-3.79362	-2.35625	-0.465282	0.0251284	2.17482	1.20576	0.598723	3.14657		0.641593
20210929	0.937	0.031529	1.67595	-0.486269	-4.34667	-2.36036	-0.632084	-0.0670768	2.13642	1.19993	0.59894	3.14561		1.22121
20210930	0.937	0.126017	1.01978	0.583614	-4.64667	-2.35492	-0.790105	-0.159449	2.0978	1.19408	0.59915	3.14465		1.72941
20211001	0.663	-0.00024971	0.534764	1.35741	-4.71637	-2.33813	-0.938838	-0.251906	2.05898	1.18821	0.599355	3.14369		1.89192
20211002	0.596	0.0236795	0.158917	1.78836	-4.59165	-2.30811	-1.07786	-0.344363	2.01996	1.18231	0.599553	3.14272		1.97096
20211003	0.533	-0.30871	-0.126618	1.9046	-4.31019	-2.26285	-1.20683	-0.436735	1.98077	1.1764	0.599745	3.14176		1.46927
20211004	0.533	0.271733	-0.200422	1.75216	-3.90597	-2.20013	-1.3255	-0.528939	1.9414	1.17046	0.599931	3.1408		1.82347
20211005	0.663	0.0849047	-0.0245527	1.38998	-3.41038	-2.11833	-1.43372	-0.620887	1.90187	1.1645	0.600111	3.13984		1.45033
20211006	0.533	-0.153026	0.184182	0.857507	-2.84392	-2.01751	-1.53148	-0.712492	1.86219	1.15852	0.600284	3.13888		0.888663
20211007	0.789	0.213046	0.167098	0.201747	-2.22346	-1.89943	-1.61889	-0.803667	1.82237	1.15252	0.600452	3.13793		0.581891
20211008	0.038	-0.123892	0.0127197	-0.500884	-1.56614	-1.76713	-1.69611	-0.894323	1.78243	1.1465	0.600613	3.13697		-0.612056
20211009	0.187	-0.0570399	0.0940347	-1.15777	-0.889506	-1.6244	-1.76335	-0.984373	1.74236	1.14046	0.600768	3.13601		-1.12078
20211010	0.284	-0.626923	0.397689	-1.65765	-0.210517	-1.4752	-1.82083	-1.07373	1.70219	1.1344	0.600917	3.13505		-1.88688
20211011	2.11	0.733122	0.559388	-1.86819	0.454732	-1.3233	-1.86879	-1.16231	1.66192	1.12832	0.60106	3.13409		-0.575681
20211012	2.13	1.04256	-0.107913	-1.69568	1.08648	-1.17188	-1.90753	-1.25001	1.62157	1.12222	0.601197	3.13314		-0.761041
20211013	1.57	0.506509	-1.61729	-1.14873	1.66191	-1.0235	-1.93735	-1.33677	1.58114	1.11611	0.601327	3.13218		-2.25951
20211014	1.38	-0.429333	-2.32576	-0.34348	2.15592	-0.880171	-1.95858	-1.4225	1.54065	1.10997	0.601451	3.13123		-3.09857
20211015	0.474	-4.14637	-0.781792	0.542004	2.54285	-0.743815	-1.97157	-1.50711	1.5001	1.10381	0.601569	3.13027		-4.38616
20211016	10.9	2.81265	1.9497	1.2739	2.79766	-0.616541	-1.97669	-1.59055	1.45951	1.09764	0.601681	3.12932		6.03625
20211017	13.5	4.01584	3.06837	1.61024	2.89859	-0.500744	-1.97435	-1.67272	1.41888	1.09144	0.601786	3.12837		8.69445
20211018	4.61	-3.0629	1.3546	1.40809	2.83702	-0.398332	-1.96492	-1.75357	1.37823	1.08523	0.601885	3.12741		-0.300215
20211019	2.75	-1.78239	-1.02636	0.839745	2.63084	-0.310267	-1.94872	-1.83301	1.33758	1.079	0.601978	3.12646		-1.96901
20211020	2.62	0.00882037	-1.887	0.157465	2.31089	-0.236153	-1.92601	-1.911	1.29692	1.07275	0.602065	3.12551		-1.72071
20211021	2.75	0.725534	-1.35385	-0.428848	1.90968	-0.17496	-1.89705	-1.98747	1.25627	1.06648	0.602145	3.12456		-1.05716
20211022	2.11	0.288448	-0.477951	-0.783597	1.4586	-0.125362	-1.86214	-2.06236	1.21564	1.0602	0.602219	3.12361		-0.9731
20211023	2.13	-0.0385059	0.236718	-0.886124	0.988561	-0.0859504	-1.8216	-2.13562	1.17504	1.0539	0.602287	3.12265		-0.687912
20211024	1.85	-0.14089	0.604855	-0.778879	0.527458	-0.0552619	-1.77581	-2.20721	1.13448	1.04758	0.602348	3.1217		-0.314914
20211025	1.78	-0.00501754	0.613909	-0.559505	0.0985787	-0.0317575	-1.72517	-2.27708	1.09398	1.04124	0.602403	3.12076		0.0493865
20211026	1.71	-0.0220855	0.386599	-0.325459	-0.2793	-0.0139116	-1.67013	-2.34518	1.05353	1.03489	0.602452	3.11981		0.0390544
20211027	1.09	0.230446	0.0331493	-0.151312	-0.591146	-0.000363107	-1.61112	-2.41149	1.01316	1.02852	0.602495	3.11886		0.112284
20211028	0.214	-0.313212	-0.295604	-0.0731412	-0.827252	0.0100847	-1.54858	-2.47596	0.972866	1.02214	0.602531	3.11791		-0.681958
20211029	0.187	0.0388213	-0.3625	-0.0871617	-0.984898	0.0184878	-1.48293	-2.53857	0.932666	1.01574	0.602561	3.11696		-0.41084
20211030	0.163	-0.0528112	-0.102577	-0.16048	-1.06867	0.0256779	-1.41462	-2.5993	0.892568	1.00932	0.602584	3.11602		-0.315868
20211031	0.163	-0.152922	0.289406	-0.252096	-1.08833	0.0326425	-1.34404	-2.65811	0.852582	1.00288	0.602601	3.11507		-0.115612
20211101	1.16	0.305741	0.457476	-0.317753	-1.05605	0.0405596	-1.27158	-2.71499	0.812718	0.996434	0.602612	3.11412		0.445464
20211102	0.214	-0.155218	0.239106	-0.315202	-0.985911	0.0505497	-1.19766	-2.76991	0.772985	0.98997	0.602616	3.11318		-0.231314
20211103	0.187	-0.26975	-0.220142	-0.207172	-0.893172	0.0637299	-1.12269	-2.82287	0.733393	0.983489	0.602614	3.11223		-0.697064
20211104	1.16	0.693847	-0.687533	0.0266869	-0.791788	0.0812197	-1.04709	-2.87384	0.693951	0.976994	0.602605	3.11129		0.0330013
20211105	0.187	-0.261479	-0.737521	0.369588	-0.692732	0.104123	-0.971276	-2.9228	0.654669	0.970484	0.60259	3.11035		-0.629411
20211106	0.119	-1.34334	-0.121539	0.747816	-0.60309	0.133372	-0.895642	-2.96975	0.615557	0.963959	0.602569	3.1094		-0.717061
20211107	4.32	1.77806	0.677815	1.04745	-0.527174	0.169641	-0.820561	-3.01467	0.576623	0.95742	0.602541	3.10846		3.50332
20211108	2.49	-0.577492	0.716352	1.16074	-0.467039	0.213088	-0.746394	-3.05756	0.537876	0.950866	0.602506	3.10752		1.2996
20211109	2.13	-0.329405	0.233872	1.04282	-0.420925	0.263115	-0.673459	-3.09841	0.499326	0.944298	0.602466	3.10658		0.947282
20211110	1.97	0.12045	-0.0155671	0.717875	-0.383815	0.318627	-0.602028	-3.13722	0.46098	0.937717	0.602419	3.10564		0.822759
20211111	1.64	0.00561642	0.0206176	0.257467	-0.349034	0.378194	-0.532337	-3.17399	0.422846	0.931121	0.602365	3.1047		0.283701
20211112	1.31	0.072663	-0.054374	-0.247726	-0.309976	0.44028	-0.464592	-3.20872	0.384932	0.924512	0.602305	3.10376		-0.229437
20211113	0.215	-0.194314	-0.236596	-0.712526	-0.259728	0.503296	-0.398973	-3.24142	0.347248	0.91789	0.602238	3.10282		-1.14344
20211114	0.214	0.0411319	-0.32123	-1.07672	-0.191386	0.565726	-0.335643	-3.27209	0.309798	0.911255	0.602165	3.10188		-1.35681
20211115	0.214	-0.174223	-0.217778	-1.29755	-0.0988222	0.626102	-0.274752	-3.30074	0.272592	0.904606	0.602085	3.10094		-1.68955
20211116	0.284	-0.444025	0.103508	-1.33646	0.0194854	0.683061	-0.216432	-3.32738	0.235636	0.897945	0.601999	3.1		-1.67697
20211117	1.97	1.00164	0.188913	-1.15584	0.15858	0.735461	-0.160791	-3.35202	0.198936	0.891272	0.601906	3.09906		0.0347098
20211118	2.03	0.736895	-0.406383	-0.740296	0.307654	0.782199	-0.107923	-3.37467	0.162499	0.884586	0.601807	3.09813		-0.409784
20211119	0.663	-0.313234	-1.1807	-0.134569	0.452893	0.822216	-0.0579146	-3.39536	0.126332	0.877887	0.601701	3.09719		-1.6285
20211120	0.663	-1.86543	-0.935786	0.564864	0.580388	0.854518	-0.0108298	-3.4141	0.0904403	0.871177	0.601589	3.09626		-2.23636
20211121	2	-2.64682	0.678176	1.20175	0.676054	0.878193	0.0332819	-3.43092	0.0548297	0.864455	0.60147	3.09532		-0.766889
20211122	9.46	3.56577	2.0175	1.57235	0.726416	0.892464	0.074384	-3.44583	0.0195061	0.857722	0.601345	3.09439		7.15561
20211123	3.14	-2.11657	1.08399	1.52009	0.722014	0.896809	0.112462	-3.45887	-0.0155247	0.850977	0.601213	3.09345		0.48751
20211124	2.28	-0.697376	-0.727294	1.10549	0.663913	0.891258	0.147551	-3.47007	-0.0502569	0.84422	0.601074	3.09252		-0.31918
20211125	2.05	0.161334	-1.38282	0.480144	0.560239	0.876264	0.17973	-3.47946	-0.084685	0.837453	0.600929	3.09158		-0.741345
20211126	2.08	0.181701	-0.759321	-0.194411	0.422183	0.852606	0.209092	-3.48708	-0.118803	0.830675	0.600777	3.09065		-0.772031
20211127	1.71	0.226213	0.123496	-0.757598	0.261595	0.821331	0.235735	-3.49296	-0.152607	0.823887	0.600618	3.08972		-0.40789
20211128	1.46	0.197176	0.43939	-1.08649	0.0914751	0.783654	0.259776	-3.49715	-0.186089	0.817088	0.600453	3.08879		-0.449924
20211129	0.37	-0.181333	0.0891743	-1.1481	-0.0751671	0.740841	0.281354	-3.49969	-0.219246	0.810278	0.600282	3.08786		-1.24026
20211130	0.325	0.0106532	-0.409093	-0.968912	-0.227818	0.69419	0.300619	-3.50063	-0.252072	0.803459	0.600103	3.08693		-1.36735
20211201	0.37	-0.114339	-0.518517	-0.614062	-0.358096	0.644955	0.317741	-3.5	-0.284562	0.79663	0.599918	3.086		-1.24692
20211202	0.42	-0.45586	-0.0679927	-0.172396	-0.460774	0.594388	0.33289	-3.49785	-0.316712	0.789791	0.599727	3.08507		-0.69625
20211203	2.03	0.0352691	0.482493	0.240136	-0.53262	0.543693	0.346231	-3.49422	-0.348516	0.782943	0.599528	3.08414		0.757898
20211204	1.91	0.300294	0.491444	0.521824	-0.572056	0.493986	0.35792	-3.48918	-0.37997	0.776085	0.599323	3.08321		1.31356
20211205	1.91	0.46754	0.0621663	0.619512	-0.578261	0.446219	0.368114	-3.48275	-0.41107	0.769219	0.599112	3.08228		1.14922
20211206	0.325	-0.484222	-0.279005	0.540903	-0.552699	0.401155	0.376972	-3.47499	-0.441812	0.762343	0.598893	3.08135		-0.222323
20211207	0.284	-0.565385	-0.212886	0.344743	-0.499871	0.35932	0.384636	-3.46596	-0.472192	0.755459	0.598668	3.08043		-0.433528
20211208	1.71	0.940048	-0.0158774	0.115341	-0.426615	0.321055	0.391232	-3.45569	-0.502206	0.748566	0.598437	3.0795		1.03951
20211209	0.215	-0.460913	-0.101387	-0.0694375	-0.340853	0.286518	0.396874	-3.44424	-0.53185	0.741665	0.598198	3.07858		-0.631737
20211210	0.215	-0.121211	-0.380416	-0.162037	-0.249789	0.25569	0.401682	-3.43167	-0.56112	0.734756	0.597953	3.07765		-0.663664
20211211	0.215	0.127196	-0.361157	-0.158294	-0.15945	0.228423	0.405774	-3.41802	-0.590013	0.727839	0.597701	3.07673		-0.392254
20211212	0.474	-0.219122	0.182473	-0.0896901	-0.0748698	0.204463	0.409255	-3.40335	-0.618525	0.720915	0.597442	3.0758		-0.126339
20211213	1.97	0.515536	0.667637	-0.00198081	0.000198034	0.183508	0.41222	-3.38769	-0.646653	0.713983	0.597177	3.07488		1.18119
20211214	1.78	0.305294	0.499113	0.0604951	0.0633971	0.165204	0.414762	-3.37109	-0.674394	0.707043	0.596905	3.07395		0.864902
20211215	0.37	-0.834025	-0.0102619	0.0823397	0.113136	0.149119	0.416967	-3.35361	-0.701745	0.700097	0.596626	3.07303		-0.761947
20211216	0.37	-0.457376	-0.266026	0.0737928	0.149388	0.134741	0.418926	-3.33528	-0.728703	0.693143	0.59634	3.07211		-0.649609
20211217	1.78	1.19254	-0.348135	0.0566319	0.174627	0.121518	0.420721	-3.31615	-0.755265	0.686183	0.596047	3.07119		0.901032
20211218	0.474	-0.446616	-0.347974	0.0480377	0.192174	0.108904	0.422427	-3.29627	-0.781428	0.679216	0.595748	3.07027		-0.746552
20211219	0.42	-0.619766	-0.0154713	0.0517642	0.204701	0.0963873	0.424116	-3.27568	-0.807191	0.672243	0.595442	3.06935		-0.583473
20211220	1.91	0.310513	0.390241	0.0583541	0.214451	0.0834794	0.425857	-3.25441	-0.832551	0.665264	0.595129	3.06843		0.759107
20211221	1.91	0.726008	0.307323	0.0572921	0.222981	0.069743	0.427716	-3.23252	-0.857505	0.658278	0.594809	3.06751		1.09062
20211222	0.247	-0.651859	-0.136514	0.0399074	0.231128	0.0548993	0.429756	-3.21003	-0.882052	0.651287	0.594482	3.06659		-0.748466
20211223	0.214	-0.432447	-0.227349	0.00392603	0.239289	0.0387799	0.432033	-3.18699	-0.90619	0.644291	0.594148	3.06567		-0.65587
20211224	1.71	0.692139	0.0697548	-0.0389296	0.247695	0.0212752	0.4346	-3.16343	-0.929917	0.637288	0.593808	3.06475		0.722964
20211225	0.962	0.192178	0.180476	-0.0628865	0.255642	0.00232894	0.437507	-3.1394	-0.953234	0.630281	0.593461	3.06383		0.309768
20211226	0.214	-0.187736	-0.105145	-0.0551987	0.261279	-0.0180242	0.4408	-3.11491	-0.976138	0.623268	0.593107	3.06292		-0.34808
20211227	0.214	-0.127063	-0.320875	-0.0233557	0.262177	-0.0396933	0.444524	-3.09	-0.998629	0.616251	0.592746	3.062		-0.471293
20211228	0.214	-0.492567	-0.0605394	0.0178043	0.256238	-0.0624955	0.44871	-3.06471	-1.02071	0.609228	0.592378	3.06108		-0.535302
20211229	1.78	0.569623	0.380403	0.0426863	0.242644	-0.0861979	0.453391	-3.03904	-1.04237	0.602201	0.592003	3.06017		0.992712
20211230	1.71	0.66089	0.435207	0.0358107	0.221169	-0.110486	0.458601	-3.01305	-1.06362	0.59517	0.591621	3.05925		1.13191
20211231	0.215	-0.385332	0.0187081	0.00691354	0.192516	-0.134994	0.464369	-2.98674	-1.08445	0.588134	0.591233	3.05834		-0.35971
20220101	0.214	-0.0767774	-0.354712	-0.0206845	0.158244	-0.1593	0.470711	-2.96014	-1.10487	0.581093	0.590837	3.05743		-0.452174
20220102	0.214	-0.110477	-0.358422	-0.0262199	0.120115	-0.18294	0.477632	-2.93327	-1.12487	0.574049	0.590435	3.05651		-0.495119
20220103	0.214	0.231801	-0.135863	-0.00126858	0.0795814	-0.205361	0.485126	-2.90615	-1.14446	0.567	0.590025	3.0556		0.0946688
20220104	0.214	-0.256453	0.169845	0.0395105	0.0377994	-0.225907	0.493174	-2.87878	-1.16364	0.559948	0.589609	3.05469		-0.0470969
20220105	0.214	-0.232848	0.368262	0.0699938	-0.00467681	-0.243922	0.50173	-2.85117	-1.1824	0.552891	0.589186	3.05378		0.205407
20220106	1.64	0.516543	0.324713	0.0805219	-0.0476216	-0.258791	0.510735	-2.82332	-1.20075	0.545831	0.588755	3.05287		0.921778
20220107	0.215	-0.103094	0.0971184	0.0749784	-0.0909785	-0.269993	0.520122	-2.79524	-1.2187	0.538768	0.588318	3.05195		0.0690024
20220108	0.215	-0.147583	-0.150691	0.0690132	-0.134522	-0.277041	0.529807	-2.76693	-1.23623	0.5317	0.587874	3.05104		-0.229261
20220109	0.215	-0.140419	-0.285668	0.0662246	-0.177881	-0.279493	0.539685	-2.73837	-1.25336	0.52463	0.587423	3.05013		-0.359863
20220110	0.215	-0.0502892	-0.250509	0.0684017	-0.220508	-0.276926	0.549641	-2.70957	-1.27009	0.517556	0.586964	3.04923		-0.232397
20220111	0.215	0.165072	0.000138131	0.0725528	-0.261593	-0.268958	0.559554	-2.68051	-1.28641	0.510479	0.586499	3.04832		0.237763
20220112	0.215	-0.0456517	0.248445	0.0669235	-0.300027	-0.255265	0.569308	-2.65118	-1.30234	0.503399	0.586027	3.04741		0.269717
20220113	0.215	-0.10266	0.231267	0.0404878	-0.333468	-0.235668	0.578787	-2.62158	-1.31787	0.496316	0.585547	3.0465		0.169094
20220114	0.215	0.312272	-0.0139111	-0.00521328	-0.359034	-0.210208	0.587875	-2.5917	-1.33302	0.48923	0.585061	3.04559		0.293148
20220115	0.215	0.0075136	-0.181844	-0.062631	-0.374114	-0.179056	0.596452	-2.56153	-1.34777	0.482141	0.584568	3.04469		-0.236962
20220116	0.215	-0.0527134	-0.120647	-0.120994	-0.376192	-0.14255	0.604401	-2.53104	-1.36214	0.47505	0.584067	3.04378		-0.294354
20220117	0.325	-0.0121621	0.0337588	-0.168324	-0.36343	-0.101177	0.611596	-2.50023	-1.37614	0.467956	0.58356	3.04288		-0.146727
20220118	0.247	0.113609	0.144136	-0.203166	-0.334047	-0.0555419	0.617915	-2.46907	-1.38976	0.46086	0.583045	3.04197		0.0545793
20220119	0.215	0.124503	0.0688524	-0.218632	-0.287303	-0.00635819	0.623232	-2.43757	-1.40302	0.453762	0.582523	3.04107		-0.0252767
20220120	0.215	-0.341338	-0.122298	-0.200987	-0.224347	0.0455319	0.627431	-2.4057	-1.41591	0.446662	0.581994	3.04016		-0.664623
20220121	0.42	0.270803	-0.245959	-0.138236	-0.147683	0.099174	0.630402	-2.37344	-1.42845	0.43956	0.581458	3.03926		-0.113391
20220122	0.9367	-0.182138	-0.204094	-0.0375053	-0.0613432	0.153551	0.632044	-2.34079	-1.44063	0.432455	0.580915	3.03836		-0.423738
20220123	1.4534	0.118595	-0.0509356	0.0852184	0.0293716	0.207637	0.632261	-2.30773	-1.45248	0.425349	0.580365	3.03746		0.152878
20220124	1.97	-0.00426145	0.106666	0.208836	0.117812	0.260405	0.630964	-2.27425	-1.46398	0.418241	0.579808	3.03655		0.311241
20220125	2.03	0.411302	0.178884	0.296152	0.196744	0.310799	0.628068	-2.24032	-1.47515	0.411132	0.579244	3.03565		0.886337
20220126	2.03	-0.0748019	0.170553	0.316172	0.259557	0.357778	0.623491	-2.20593	-1.48599	0.404021	0.578672	3.03475		0.411923
20220127	2.05	0.00101691	0.144232	0.273659	0.301776	0.400402	0.617155	-2.17107	-1.49651	0.396909	0.578093	3.03385		0.418907
20220128	2	0.0333341	0.145141	0.191011	0.321827	0.437811	0.609003	-2.13573	-1.50671	0.389795	0.577507	3.03295		0.369486
20220129	2.19	-0.0235131	0.0919851	0.0916891	0.321981	0.469224	0.598989	-2.09988	-1.51661	0.38268	0.576914	3.03205		0.160161
20220130	2.49	0.617743	-0.0485867	0.0011559	0.306737	0.493956	0.587071	-2.06353	-1.5262	0.375564	0.576314	3.03115		0.570313
20220131	0.863	-0.831297	-0.236182	-0.0638292	0.281594	0.511483	0.573219	-2.02664	-1.5355	0.368447	0.575707	3.03026		-1.13131
20220201	2	0.940297	-0.216815	-0.0971325	0.252196	0.521488	0.557407	-1.98921	-1.54451	0.36133	0.575092	3.02936		0.626349
20220202	0.663	-0.775589	0.0894583	-0.113516	0.223957	0.523832	0.539622	-1.95122	-1.55323	0.354211	0.57447	3.02846		-0.799647
20220203	2.03	0.200722	0.314333	-0.135822	0.199891	0.518633	0.519861	-1.91266	-1.56168	0.347092	0.573841	3.02757		0.379233
20220204	2.03	0.444681	0.158736	-0.1546	0.179879	0.506245	0.498137	-1.8735	-1.56986	0.339973	0.573205	3.02667		0.448817
20220205	0.42	-0.561389	-0.171991	-0.1526	0.162114	0.487162	0.474496	-1.83375	-1.57778	0.332853	0.572561	3.02577		-0.88598
20220206	0.42	-0.952376	-0.237036	-0.113828	0.143862	0.461999	0.449005	-1.79338	-1.58544	0.325732	0.57191	3.02488		-1.30324
20220207	2.19	0.871803	0.0776415	-0.0307927	0.122254	0.431423	0.421736	-1.75238	-1.59286	0.318612	0.571252	3.02398		0.918652
20220208	2.19	0.135944	0.20408	0.0795918	0.0946754	0.396147	0.392763	-1.71075	-1.60003	0.311491	0.570587	3.02309		0.419616
20220209	2.19	0.0565492	-0.0793651	0.195732	0.0598219	0.356969	0.362169	-1.66847	-1.60696	0.304371	0.569914	3.0222		0.172916
20220210	0.596	-0.292641	-0.325848	0.288219	0.0176015	0.314713	0.330052	-1.62555	-1.61366	0.29725	0.569234	3.0213		-0.33027
20220211	0.533	-0.702932	-0.153566	0.327468	-0.030524	0.270242	0.296515	-1.58195	-1.62014	0.29013	0.568547	3.02041		-0.529029
20220212	2.03	0.488067	0.236523	0.295806	-0.0820831	0.224343	0.261676	-1.53769	-1.6264	0.28301	0.567853	3.01952		1.0204
20220213	1.38	0.176835	0.392251	0.187356	-0.132187	0.17765	0.225672	-1.49276	-1.63245	0.27589	0.567151	3.01863		0.756442
20220214	0.42	-0.0482315	0.186975	0.0195274	-0.174941	0.130691	0.188656	-1.44715	-1.63829	0.268771	0.566442	3.01774		0.158271
20220215	0.474	0.0704946	-0.0968479	-0.171209	-0.20526	0.0839009	0.150786	-1.40085	-1.64393	0.261653	0.565725	3.01685		-0.197562
20220216	0.37	-0.17264	-0.233189	-0.338143	-0.219434	0.0376421	0.112228	-1.35386	-1.64938	0.254535	0.565002	3.01596		-0.743972
20220217	0.325	-0.0228525	-0.212108	-0.432157	-0.21524	-0.00779668	0.0731652	-1.30618	-1.65464	0.247419	0.564271	3.01507		-0.667118
20220218	0.37	0.177726	-0.0881313	-0.423631	-0.192593	-0.0522265	0.0338019	-1.25781	-1.65971	0.240303	0.563532	3.01418		-0.334036
20220219	0.284	-0.101625	0.047829	-0.317376	-0.153884	-0.0954901	-0.00564776	-1.20874	-1.66461	0.233188	0.562786	3.01329		-0.371172
20220220	0.284	0.064248	0.104734	-0.142276	-0.102659	-0.137638	-0.0449652	-1.15897	-1.66934	0.226075	0.562033	3.0124		0.0267054
20220221	0.284	-0.0801892	0.0560908	0.0496707	-0.0426608	-0.178869	-0.0839264	-1.1085	-1.6739	0.218963	0.561273	3.01152		0.0255724
20220222	0.474	-0.508928	0.0914122	0.20602	0.0218626	-0.219486	-0.122299	-1.05733	-1.6783	0.211852	0.560505	3.01063		-0.211496
20220223	1.252	0.107411	0.294065	0.285349	0.0866465	-0.259845	-0.159851	-1.00546	-1.68254	0.204743	0.559729	3.00974		0.686826
20220224	2.03	0.450139	0.286764	0.280722	0.147749	-0.300386	-0.19636	-0.952894	-1.68663	0.197635	0.558947	3.00886		1.01762
20220225	0.533	-0.13384	-0.104736	0.227685	0.202192	-0.341573	-0.231606	-0.899635	-1.69057	0.190529	0.558156	3.00797		-0.0108921
20220226	0.533	-0.071739	-0.457889	0.15792	0.248025	-0.383842	-0.265373	-0.845687	-1.69437	0.183425	0.557359	3.00709		-0.371709
20220227	0.533	0.0360967	-0.358326	0.0994384	0.284804	-0.427495	-0.297449	-0.791057	-1.69804	0.176323	0.556554	3.0062		-0.222791
20220228	0.533	-0.295949	0.0923033	0.0634601	0.313044	-0.472456	-0.327638	-0.735751	-1.70157	0.169223	0.555741	3.00532		-0.140185
20220301	2.03	0.779119	0.396088	0.0375209	0.333633	-0.518395	-0.355755	-0.679779	-1.70497	0.162125	0.554921	3.00444		1.21273
20220302	0.474	-0.410612	0.198217	0.00450238	0.347138	-0.564855	-0.381627	-0.62315	-1.70825	0.155029	0.554094	3.00356		-0.207893
20220303	0.474	-0.0137796	-0.14979	-0.0457856	0.353773	-0.611159	-0.40509	-0.565874	-1.71141	0.147936	0.553259	3.00267		-0.209355
20220304	0.474	0.0256771	-0.219886	-0.116417	0.352672	-0.656444	-0.425993	-0.50796	-1.71445	0.140845	0.552417	3.00179		-0.310626
20220305	0.474	0.0221429	-0.021655	-0.184563	0.342937	-0.699736	-0.444201	-0.449418	-1.71738	0.133757	0.551567	3.00091		-0.184075
20220306	0.533	0.181929	0.0970824	-0.216446	0.323986	-0.740028	-0.459585	-0.390259	-1.7202	0.126671	0.55071	3.00003		0.0625652
20220307	0.533	-0.099826	-0.00543017	-0.201943	0.295223	-0.776204	-0.472024	-0.330493	-1.72291	0.119588	0.549845	2.99915		-0.3072
20220308	0.533	-0.0137817	-0.130098	-0.143454	0.255332	-0.806954	-0.481404	-0.270133	-1.72552	0.112508	0.548972	2.99827		-0.287334
20220309	0.533	0.0640314	-0.0670358	-0.0467484	0.201743	-0.830879	-0.487619	-0.209192	-1.72803	0.105432	0.548093	2.99739		-0.0497528
20220310	0.474	-0.569503	0.217326	0.0709317	0.130245	-0.846543	-0.49057	-0.147684	-1.73045	0.0983578	0.547205	2.99651		-0.281245
20220311	1.97	0.695639	0.409204	0.17252	0.0375365	-0.852484	-0.490173	-0.0856254	-1.73276	0.0912873	0.54631	2.99564		1.27736
20220312	0.42	-0.172865	0.13255	0.238688	-0.0778081	-0.847259	-0.486371	-0.0230307	-1.73499	0.0842201	0.545408	2.99476		0.198374
20220313	0.42	-0.0502367	-0.283185	0.265808	-0.214854	-0.829602	-0.479132	0.0400833	-1.73713	0.0771563	0.544498	2.99388		-0.0676136
20220314	0.399	-0.191363	-0.325514	0.271973	-0.369432	-0.798481	-0.468452	0.1037	-1.73918	0.0700961	0.54358	2.99301		-0.244904
20220315	0.399	0.0122876	-0.114848	0.27891	-0.535454	-0.753126	-0.454376	0.167802	-1.74115	0.0630396	0.542655	2.99213		0.176349
20220316	0.399	0.154716	0.0576124	0.29071	-0.704471	-0.693172	-0.436992	0.232375	-1.74303	0.0559868	0.541722	2.99126		0.503037
20220317	0.399	-0.141119	0.112981	0.292094	-0.865275	-0.618838	-0.416422	0.297401	-1.74484	0.0489379	0.540782	2.99038		0.263956
20220318	0.399	-0.0772014	0.0294182	0.258688	-1.00331	-0.530765	-0.392825	0.362864	-1.74657	0.041893	0.539834	2.98951		0.210905
20220319	0.355	0.0680733	-0.185678	0.16828	-1.10205	-0.429936	-0.36642	0.428746	-1.74822	0.0348522	0.538878	2.98863		0.0506755
20220320	0.355	-0.14947	-0.309807	0.000511796	-1.14425	-0.317558	-0.33746	0.49503	-1.74981	0.0278155	0.537915	2.98776		-0.458765
20220321	0.355	-0.397107	-0.0584813	-0.258127	-1.116	-0.195062	-0.306233	0.561699	-1.75132	0.0207832	0.536944	2.98689		-0.713715
20220322	1.8	0.803948	0.355666	-0.602359	-1.01094	-0.064149	-0.273046	0.628735	-1.75276	0.0137553	0.535966	2.98602		0.557255
20220323	0.355	-0.39396	0.322017	-0.989965	-0.831435	0.0732313	-0.23822	0.696119	-1.75413	0.00673186	0.534979	2.98514		-1.06191
20220324	0.355	0.121685	-0.134159	-1.35658	-0.585737	0.215024	-0.202084	0.763832	-1.75544	-0.000286934	0.533986	2.98427		-1.36905
20220325	0.355	0.0130367	-0.39575	-1.60765	-0.288045	0.359173	-0.164972	0.831856	-1.75668	-0.007301	0.532984	2.9834		-1.99036
20220326	0.446	-0.721028	-0.121858	-1.61713	0.0408897	0.503596	-0.127225	0.90017	-1.75787	-0.0143102	0.531975	2.98253		-2.46002
20220327	5.24	2.88838	-0.0330821	-1.25327	0.377694	0.646203	-0.0891882	0.968754	-1.75899	-0.0213145	0.530958	2.98166		1.60202
20220328	2.7	0.114479	-1.03914	-0.45176	0.699749	0.78492	-0.0512122	1.03759	-1.76005	-0.0283137	0.529934	2.98079		-1.37642
20220329	2.17	-1.08076	-2.30783	0.675397	0.986905	0.917676	-0.0136501	1.10666	-1.76105	-0.0353078	0.528902	2.97993		-2.71319
20220330	1.2	-4.86176	-1.55726	1.89798	1.22099	1.0424	0.0231382	1.17593	-1.762	-0.0422966	0.527862	2.97906		-4.52105
20220331	4.75	-5.01589	1.3895	2.92496	1.38431	1.15708	0.0587857	1.2454	-1.7629	-0.04928	0.526814	2.97819		-0.701433
20220401	19.6	6.23859	3.85943	3.4023	1.45958	1.26004	0.0929169	1.31504	-1.76374	-0.056258	0.525759	2.97732		13.5003
20220402	11.3	-0.930069	3.05112	3.05116	1.43593	1.35025	0.125155	1.38483	-1.76454	-0.0632303	0.524696	2.97646		5.17221
20220403	3.61	-4.27187	0.340495	1.97889	1.32093	1.42746	0.155125	1.45475	-1.76528	-0.070197	0.523625	2.97559		-1.95248
20220404	2.7	-1.84446	-1.87845	0.463426	1.13246	1.49199	0.182462	1.52478	-1.76597	-0.0771579	0.522546	2.97473		-3.25948
20220405	3.07	0.895147	-2.33549	-1.19746	0.890267	1.54452	0.206821	1.5949	-1.76662	-0.0841128	0.52146	2.97386		-2.6378
20220406	2.49	0.524638	-1.54123	-2.69027	0.614513	1.58591	0.227882	1.66509	-1.76722	-0.0910617	0.520366	2.973		-3.70686
20220407	0.973	-0.122344	-0.669367	-3.72128	0.325761	1.61731	0.245354	1.73533	-1.76778	-0.0980045	0.519264	2.97213		-4.51299
20220408	0.832	-0.0147701	-0.333849	-4.08852	0.0443033	1.6401	0.258967	1.8056	-1.7683	-0.104941	0.518154	2.97127		-4.43713
20220409	1.95	1.21109	-0.885363	-3.69097	-0.214593	1.65578	0.268464	1.87587	-1.76877	-0.111871	0.517037	2.97041		-3.36524
20220410	1.27	0.654319	-1.92237	-2.5642	-0.444207	1.66587	0.273601	1.94611	-1.76921	-0.118795	0.515911	2.96955		-3.83225
20220411	0.497	-1.76213	-2.22635	-0.883325	-0.642144	1.67191	0.274152	2.0163	-1.76961	-0.125712	0.514778	2.96868		-4.87181
20220412	0.61	-4.79125	-0.69506	1.07597	-0.806173	1.67538	0.269907	2.08642	-1.76997	-0.132623	0.513637	2.96782		-4.41034
20220413	15	5.81274	1.53848	2.92555	-0.933721	1.67773	0.260681	2.15642	-1.77029	-0.139527	0.512488	2.96696		10.2768
20220414	5.55	-5.85685	2.32925	4.2552	-1.02205	1.68028	0.246332	2.22629	-1.77059	-0.146424	0.511332	2.9661		0.727595
20220415	16.1	4.52581	2.24513	4.74873	-1.06868	1.68406	0.22679	2.29598	-1.77084	-0.153314	0.510167	2.96524		11.5197
20220416	12.8	2.30765	1.53723	4.3478	-1.0732	1.68987	0.202046	2.36546	-1.77107	-0.160196	0.508995	2.96438		8.19268
20220417	7	-1.04518	0.149582	3.22163	-1.03665	1.69799	0.172148	2.43469	-1.77127	-0.167072	0.507815	2.96353		2.32603
20220418	4.02	-1.45771	-1.23299	1.62859	-0.962758	1.70809	0.137187	2.50364	-1.77144	-0.17394	0.506627	2.96267		-1.0621
20220419	3.26	-0.0725718	-1.4914	-0.172924	-0.855927	1.71945	0.0972814	2.57228	-1.77158	-0.180801	0.505431	2.96181		-1.7369
20220420	3.07	0.0841364	-0.481855	-1.92948	-0.719855	1.7311	0.0525762	2.64055	-1.7717	-0.187655	0.504227	2.96095		-2.32719
20220421	2.7	0.120699	0.658872	-3.39914	-0.555874	1.74194	0.00326439	2.70841	-1.77179	-0.1945	0.503015	2.9601		-2.61957
20220422	2.32	0.144422	0.832882	-4.38	-0.36174	1.75073	-0.0503921	2.77583	-1.77186	-0.201338	0.501795	2.95924		-3.4027
20220423	0.672	-0.510814	0.094637	-4.77095	-0.137503	1.75609	-0.108082	2.84275	-1.77191	-0.208169	0.500568	2.95838		-5.18713
20220424	0.552	0.195537	-1.01972	-4.51053	0.106138	1.75624	-0.169431	2.90914	-1.77194	-0.214991	0.499332	2.95753		-5.33472
20220425	3.61	2.89032	-2.31552	-3.48337	0.353158	1.74907	-0.233998	2.97494	-1.77195	-0.221805	0.498089	2.95668		-2.90858
20220426	2.59	1.21306	-3.4304	-1.67813	0.58623	1.73242	-0.301278	3.04011	-1.77194	-0.228611	0.496837	2.95582		-3.89547
20220427	2.4	-1.537	-2.96112	0.60429	0.786736	1.70422	-0.370695	3.10462	-1.77192	-0.235409	0.495578	2.95497		-3.89383
20220428	3.43	-7.002	0.854838	2.84118	0.934386	1.66265	-0.441627	3.1684	-1.77189	-0.242198	0.49431	2.95412		-3.30598
20220429	23.3	7.39577	5.16805	4.35485	1.00817	1.60637	-0.51342	3.23143	-1.77184	-0.248979	0.493035	2.95326		16.9187
20220430	11.3	-4.72835	4.4611	4.58293	0.990855	1.53463	-0.585403	3.29365	-1.77178	-0.255751	0.491752	2.95241		4.31567
20220501	7	-3.75696	0.618297	3.60348	0.883505	1.44734	-0.656908	3.35501	-1.7717	-0.262515	0.49046	2.95156		0.464818
20220502	3.11	-2.80955	-2.16395	1.85362	0.70393	1.34543	-0.727277	3.41548	-1.77162	-0.26927	0.489161	2.95071		-3.11988
20220503	2.94	-0.303522	-2.56099	-0.177726	0.474704	1.23033	-0.795874	3.47501	-1.77154	-0.276015	0.487853	2.94986		-3.04224
20220504	2.59	0.574232	-1.42818	-1.98646	0.219636	1.10364	-0.862076	3.53355	-1.77145	-0.282752	0.486538	2.94901		-2.8404
20220505	2.24	0.778921	-0.491755	-3.10349	-0.0371371	0.967023	-0.925277	3.59106	-1.77135	-0.28948	0.485215	2.94816		-2.81632
20220506	0.61	0.0148085	-0.801576	-3.24256	-0.275301	0.8221	-0.98489	3.64751	-1.77125	-0.296198	0.483883	2.94731		-4.02933
20220507	0.399	0.7109	-1.94093	-2.45936	-0.485615	0.670319	-1.04035	3.70283	-1.77115	-0.302908	0.482544	2.94646		-3.68939
20220508	1.64	0.88784	-2.11105	-1.10549	-0.666444	0.512835	-1.09112	3.757	-1.77105	-0.309607	0.481196	2.94562		-2.3287
20220509	0.355	-3.99794	0.151567	0.359847	-0.816995	0.350505	-1.13669	3.80996	-1.77095	-0.316297	0.479841	2.94477		-3.48652
20220510	11.8	4.27531	2.69128	1.45449	-0.936247	0.183918	-1.17648	3.86169	-1.77085	-0.322978	0.478477	2.94392		8.42108
20220511	3.61	-3.22248	1.897	1.81684	-1.02439	0.0136207	-1.20989	3.91212	-1.77075	-0.329648	0.477105	2.94308		0.491362
20220512	2.7	-1.09596	-0.314468	1.52962	-1.08427	-0.160041	-1.23627	3.96123	-1.77067	-0.336309	0.475725	2.94223		0.119191
20220513	2.24	0.0652906	-1.26738	0.874601	-1.11913	-0.337175	-1.255	4.00898	-1.77058	-0.34296	0.474337	2.94139		-0.327491
20220514	2.02	0.312404	-0.896483	0.145257	-1.13076	-0.51861	-1.26542	4.05531	-1.77051	-0.349601	0.472941	2.94054		-0.438822
20220515	2.7	0.827255	-0.437885	-0.389121	-1.12014	-0.705538	-1.26688	4.1002	-1.77045	-0.356231	0.471537	2.9397		0.000248842
20220516	0.832	-0.429485	-0.359978	-0.596007	-1.08389	-0.898916	-1.25876	4.1436	-1.77039	-0.362851	0.470125	2.93885		-1.38547
20220517	0.764	-0.69295	-0.134607	-0.539329	-1.01266	-1.09959	-1.24045	4.18547	-1.77035	-0.369461	0.468704	2.93801		-1.36689
20220518	2.16	0.0562528	0.512125	-0.35555	-0.891207	-1.30839	-1.21141	4.22578	-1.77032	-0.37606	0.467275	2.93717		0.212827
20220519	3.61	0.969594	1.11501	-0.188994	-0.705084	-1.52564	-1.17115	4.26448	-1.77031	-0.382649	0.465839	2.93633		1.89561
20220520	3.26	0.147771	1.17082	-0.146562	-0.445751	-1.7509	-1.11927	4.30155	-1.77031	-0.389226	0.464394	2.93548		1.17203
20220521	2.17	-1.00234	0.844893	-0.22995	-0.112672	-1.98306	-1.05544	4.33694	-1.77033	-0.395793	0.462941	2.93464		-0.387399
20220522	3.07	0.380239	0.4548	-0.375929	0.291671	-2.21984	-0.979462	4.37064	-1.77037	-0.402349	0.461479	2.9338		0.459111
20220523	2.4	0.404912	-0.323034	-0.463071	0.758872	-2.45758	-0.891323	4.40261	-1.77043	-0.408894	0.46001	2.93296		-0.381193
20220524	2.16	0.82177	-1.73006	-0.393029	1.27214	-2.69115	-0.791274	4.43282	-1.77051	-0.415428	0.458532	2.93212		-1.30132
20220525	0.672	-0.169771	-2.9649	-0.175124	1.79943	-2.91356	-0.679818	4.46124	-1.77061	-0.421951	0.457046	2.93129		-3.30979
20220526	0.672	-1.20388	-2.56095	0.130631	2.29779	-3.11725	-0.557611	4.48784	-1.77073	-0.428462	0.455552	2.93045		-3.63419
20220527	2.24	-3.29466	0.300701	0.405341	2.72098	-3.29485	-0.42543	4.5126	-1.77088	-0.434961	0.45405	2.92961		-2.58862
20220528	12.8	4.00467	3.38176	0.470818	3.0207	-3.43881	-0.284152	4.53548	-1.77105	-0.441449	0.452539	2.92877		7.85725
20220529	7.42	-1.61453	3.43532	0.181353	3.14694	-3.54184	-0.134697	4.55645	-1.77124	-0.447926	0.45102	2.92794		2.00214
20220530	3.43	-2.47017	1.30585	-0.393417	3.05222	-3.59764	0.0219608	4.5755	-1.77146	-0.45439	0.449493	2.9271		-1.55774
20220531	2.7	-0.458971	-1.05902	-0.932167	2.69308	-3.60166	0.184801	4.59257	-1.77171	-0.460843	0.447958	2.92626		-2.45015
20220601	2.32	1.68772	-2.45038	-1.05086	2.03885	-3.55148	0.352776	4.60765	-1.77198	-0.467283	0.446414	2.92543		-1.81353
20220602	2.23	1.2973	-2.46286	-0.411453	1.10462	-3.4461	0.524796	4.62071	-1.77228	-0.473712	0.444862	2.92459		-1.57701
20220603	1.27	-1.94341	-0.828534	1.03583	-0.0330453	-3.28477	0.699727	4.63172	-1.7726	-0.480128	0.443302	2.92376		-1.73611
20220604	3.43	-3.83147	2.03897	2.85062	-1.27153	-3.06712	0.876405	4.64065	-1.77296	-0.486532	0.441734	2.92293		1.05811
20220605	13.9	4.3174	3.97075	4.35213	-2.50391	-2.79334	1.05364	4.64746	-1.77334	-0.492923	0.440157	2.92209		12.6403
20220606	5.03	-3.19847	2.72339	4.86038	-3.62027	-2.46429	1.23022	4.65214	-1.77375	-0.499302	0.438572	2.92126		4.38531
20220607	3.26	-1.93963	0.683826	3.96928	-4.52122	-2.08155	1.40493	4.65464	-1.77418	-0.505668	0.436978	2.92043		2.71347
20220608	2.81	0.581634	0.618606	1.54749	-5.15096	-1.64728	1.57654	4.65495	-1.77465	-0.512021	0.435376	2.9196		2.74772
20220609	2.4	1.03946	2.57118	-2.04443	-5.46829	-1.16447	1.74379	4.65302	-1.77514	-0.518362	0.433766	2.91877		1.56621
20220610	0.832	0.5087	4.84912	-5.99437	-5.43197	-0.637992	1.90544	4.64884	-1.77566	-0.524689	0.432148	2.91793		-0.636552
20220611	0.764	1.50015	5.81917	-9.37207	-5.01269	-0.0765253	2.06023	4.64237	-1.77621	-0.531003	0.430521	2.9171		-2.05275
20220612	5.88	9.01063	4.01474	-11.2999	-4.20007	0.507183	2.20692	4.63359	-1.77678	-0.537305	0.428886	2.91628		1.7255
20220613	5.55	13.6147	-2.87716	-11.1937	-3.00933	1.09849	2.34425	4.62247	-1.77737	-0.543592	0.427242	2.91545		-0.456099
20220614	3.43	18.4264	-14.4941	-8.8735	-1.52105	1.68232	2.47097	4.60898	-1.778	-0.549867	0.42559	2.91462		-4.94119
20220615	2.81	21.0314	-24.3532	-4.64652	0.137424	2.24354	2.58582	4.5931	-1.77864	-0.556128	0.42393	2.91379		-7.96833
20220616	2.32	11.9979	-23.2474	0.880741	1.82379	2.76703	2.68753	4.57483	-1.77931	-0.562375	0.422261	2.91296		-10.3687
20220617	1.35	-13.4049	-6.69114	6.6678	3.39388	3.23767	2.77483	4.55415	-1.78	-0.568608	0.420584	2.91214		-13.4282
20220618	0.61	-46.6171	18.9129	11.3878	4.70349	3.64032	2.84645	4.53106	-1.78071	-0.574828	0.418898	2.91131		-16.3163
20220619	116	48.7247	35.6983	13.6641	5.60896	3.95987	2.9011	4.50556	-1.78144	-0.581033	0.417204	2.91048		98.0871
20220620	11.8	-47.439	27.9745	12.5537	6.00171	4.18182	2.93753	4.47765	-1.7822	-0.587225	0.415502	2.90966		-6.9108
[truncated: 194 more rows]
