# Supplementary material for: Multifractal analysis of vegetation regulation on ecohydrological processes in a small watershed
Source: PeerJ journal article supplement (doi:10.7717/peerj.20496), 2026-01-12
Supplement: Figure_3_data.zip [file Runoff-DFA.xlsx]

## Sheet: Sheet1
ss	FF
1.09861	-1.30719
1.38629	-0.945176
1.60944	-0.773532
1.79176	-0.644915
1.94591	-0.517126
2.07944	-0.328109
2.19722	-0.280975
2.30259	-0.171659
2.3979	-0.169611
2.56495	-0.00215573
2.63906	0.0631786
2.77259	0.170342
2.89037	0.237297
2.99573	0.270282
3.09104	0.371986
3.21888	0.415433
3.3322	0.468949
3.43399	0.554818
3.55535	0.591879
3.66356	0.715428
3.78419	0.750932
3.89182	0.790503
4.00733	0.910114
4.11087	1.08729
4.23411	1.12412
4.34381	1.21696
4.45435	1.3526
4.56435	1.34962
4.67283	1.47954
4.78749	1.64159
4.89784	1.74371
5.01064	1.85123
5.12396	1.95394
5.23111	2.10821
5.34711	2.15567
5.45532	2.28308
5.56834	2.3973
5.68017	2.52999
5.79301	2.59607
5.90536	2.60138
6.01616	2.74891
6.12687	2.8453
6.24028	2.78463
6.35089	2.80863
6.46303	2.98176
6.57508	3.0955
6.68586	3.10003
6.79794	3.15015
6.90975	3.12123
7.02198	3.20375
7.1333	3.20225
7.24494	3.23647
7.35692	3.32104
7.46851	3.51181
7.58019	3.58305
7.69211	3.56033
