# Supplementary material for: Multifractal analysis of vegetation regulation on ecohydrological processes in a small watershed
Source: PeerJ journal article supplement (doi:10.7717/peerj.20496), 2026-01-12
Supplement: Figure_3_data.zip [file Sliding-window precipitation-DFA.xlsx]

## Sheet: Sheet1
year	month	α
2017	12	0.547285
2018	1	0.536406
2018	2	0.531655
2018	3	0.553266
2018	4	0.483136
2018	5	0.563208
2018	6	0.52511
2018	7	0.623802
2018	8	0.442587
2018	9	0.580479
2018	10	0.517236
2018	11	0.48658
2018	12	0.534137
2019	1	0.473756
2019	2	0.499044
2019	3	0.468909
2019	4	0.498257
2019	5	0.493122
2019	6	0.521166
2019	7	0.445969
2019	8	0.593452
2019	9	0.519875
2019	10	0.57181
2019	11	0.591036
2019	12	0.613066
2020	1	0.576995
2020	2	0.566617
2020	3	0.564237
2020	4	0.528504
2020	5	0.560907
2020	6	0.572846
2020	7	0.412051
2020	8	0.619328
2020	9	0.607931
2020	10	0.569045
2020	11	0.568472
2020	12	0.612962
2021	1	0.556635
2021	2	0.633273
2021	3	0.544321
2021	4	0.626635
2021	5	0.506233
2021	6	0.601706
2021	7	0.549515
2021	8	0.534164
2021	9	0.565652
2021	10	0.639279
2021	11	0.607179
2021	12	0.59066
2022	1	0.603376
2022	2	0.626665
2022	3	0.609298
2022	4	0.589695
2022	5	0.562783
2022	6	0.485635
2022	7	0.378728
2022	8	0.485837
2022	9	0.521658
2022	10	0.571335
2022	11	0.561135
2022	12	0.577815
