# Supplementary material for: Multifractal analysis of vegetation regulation on ecohydrological processes in a small watershed
Source: PeerJ journal article supplement (doi:10.7717/peerj.20496), 2026-01-12
Supplement: Figure_3_data.zip [file Sliding-window runoff-DFA.xlsx]

## Sheet: Sheet1
year	month	α
2017	12	0.725954
2018	1	0.748585
2018	2	0.717
2018	3	0.745317
2018	4	0.59363
2018	5	0.774293
2018	6	0.742074
2018	7	0.774117
2018	8	0.700335
2018	9	0.744787
2018	10	0.680477
2018	11	0.628954
2018	12	0.765157
2019	1	0.634679
2019	2	0.705117
2019	3	0.564845
2019	4	0.695003
2019	5	0.681882
2019	6	0.753413
2019	7	0.7455
2019	8	0.675353
2019	9	0.674995
2019	10	0.81184
2019	11	0.755404
2019	12	0.819665
2020	1	0.822073
2020	2	0.797937
2020	3	0.776245
2020	4	0.741387
2020	5	0.755689
2020	6	0.735456
2020	7	0.421289
2020	8	0.6288
2020	9	0.545486
2020	10	0.577219
2020	11	0.54466
2020	12	0.556365
2021	1	0.510109
2021	2	0.561385
2021	3	0.549661
2021	4	0.575259
2021	5	0.406525
2021	6	0.625297
2021	7	0.641938
2021	8	0.577894
2021	9	0.599955
2021	10	0.654861
2021	11	0.638318
2021	12	0.644795
2022	1	0.582735
2022	2	0.620446
2022	3	0.600217
2022	4	0.624133
2022	5	0.542488
2022	6	0.5036
2022	7	0.441236
2022	8	0.679048
2022	9	0.704363
2022	10	0.725323
2022	11	0.705802
2022	12	0.792842
