# Supplementary material for: Multifractal analysis of vegetation regulation on ecohydrological processes in a small watershed
Source: PeerJ journal article supplement (doi:10.7717/peerj.20496), 2026-01-12
Supplement: Figure_4_data.zip [file MFDCCA.xlsx]

## Sheet: h and q
q	h-original		h-shuffled		h-surrogate
-20	1.59293		0.705479		0.869305
-19.5	1.59197		0.704223		0.868288
-19	1.59097		0.70291		0.867226
-18.5	1.58992		0.701536		0.866119
-18	1.58882		0.700096		0.864962
-17.5	1.58766		0.698587		0.863752
-17	1.58645		0.697003		0.862486
-16.5	1.58517		0.695341		0.861161
-16	1.58383		0.693594		0.859772
-15.5	1.5824		0.691758		0.858315
-15	1.5809		0.689827		0.856785
-14.5	1.5793		0.687794		0.855177
-14	1.5776		0.685652		0.853486
-13.5	1.5758		0.683396		0.851706
-13	1.57387		0.681018		0.849831
-12.5	1.57181		0.678509		0.847853
-12	1.5696		0.675863		0.845766
-11.5	1.56722		0.67307		0.843562
-11	1.56466		0.670122		0.841233
-10.5	1.56188		0.66701		0.838769
-10	1.55887		0.663723		0.836161
-9.5	1.55558		0.660251		0.8334
-9	1.55199		0.656582		0.830474
-8.5	1.54803		0.652701		0.827375
-8	1.54365		0.648593		0.824091
-7.5	1.53878		0.644237		0.82061
-7	1.53333		0.639611		0.816924
-6.5	1.52716		0.634685		0.813021
-6	1.52011		0.629423		0.808894
-5.5	1.51194		0.623779		0.804536
-5	1.50233		0.617698		0.79994
-4.5	1.49077		0.611113		0.795106
-4	1.47651		0.603947		0.790034
-3.5	1.45838		0.596112		0.784728
-3	1.43465		0.587513		0.779194
-2.5	1.40322		0.578057		0.773444
-2	1.36334		0.56766		0.767492
-1.5	1.31915		0.556267		0.761354
-1	1.27453		0.543869		0.755051
-0.5	1.21489		0.530521		0.748603
0	1.12403		0.516362		0.74203
0.5	1.01784		0.501612		0.735356
1	0.92412		0.48656		0.728604
1.5	0.853296		0.471535		0.721798
2	0.801981		0.456862		0.714964
2.5	0.763984		0.442827		0.708136
3	0.734482		0.429644		0.701347
3.5	0.71039		0.417453		0.694636
4	0.689864		0.406314		0.688043
4.5	0.67184		0.396227		0.681606
5	0.655704		0.387147		0.675359
5.5	0.641105		0.379001		0.669333
6	0.627827		0.371699		0.663548
6.5	0.615728		0.365152		0.65802
7	0.6047		0.359269		0.652758
7.5	0.594651		0.353966		0.647762
8	0.585497		0.34917		0.643031
8.5	0.577158		0.344813		0.63856
9	0.56956		0.340838		0.634338
9.5	0.56263		0.337195		0.630356
10	0.556303		0.333842		0.626601
10.5	0.550519		0.330742		0.623061
11	0.54522		0.327866		0.619724
11.5	0.540358		0.325185		0.616577
12	0.535888		0.32268		0.613608
12.5	0.531769		0.32033		0.610805
13	0.527965		0.318119		0.608157
13.5	0.524445		0.316033		0.605653
14	0.52118		0.314061		0.603284
14.5	0.518146		0.312193		0.601041
15	0.515321		0.310419		0.598915
15.5	0.512684		0.308732		0.596897
16	0.510218		0.307125		0.594981
16.5	0.507908		0.305591		0.593161
17	0.505741		0.304126		0.591428
17.5	0.503702		0.302725		0.589779
18	0.501783		0.301384		0.588207
18.5	0.499972		0.300098		0.586708
19	0.498261		0.298864		0.585276
19.5	0.496642		0.29768		0.583909
20	0.495108		0.296542		0.582601

## Sheet: FF and ss
ss		FF
		-20	-19.5	-19	-18.5	-18	-17.5	-17	-16.5	-16	-15.5	-15	-14.5	-14	-13.5	-13	-12.5	-12	-11.5	-11	-10.5	-10	-9.5	-9	-8.5	-8	-7.5	-7	-6.5	-6	-5.5	-5	-4.5	-4	-3.5	-3	-2.5	-2	-1.5	-1	-0.5	0	0.5	1	1.5	2	2.5	3	3.5
2.3979		-5.33245	-5.32559	-5.31837	-5.31076	-5.30273	-5.29425	-5.28528	-5.27577	-5.26567	-5.25492	-5.24346	-5.23122	-5.21811	-5.20404	-5.1889	-5.17256	-5.15488	-5.13567	-5.11474	-5.09185	-5.06672	-5.03899	-5.00827	-4.97404	-4.93568	-4.89243	-4.84334	-4.78716	-4.72235	-4.64684	-4.55792	-4.45195	-4.32394	-4.16709	-3.97229	-3.7283	-3.42452	-3.05882	-2.64594	-2.2099	-1.76977	-1.35014	-0.982545	-0.68155	-0.441023	-0.247861	-0.0903052	0.0404118
2.56495		-5.0991	-5.09164	-5.08379	-5.07552	-5.06679	-5.05756	-5.04779	-5.03743	-5.02642	-5.01471	-5.00221	-4.98886	-4.97456	-4.95921	-4.94269	-4.92486	-4.90556	-4.8846	-4.86177	-4.83681	-4.8094	-4.77919	-4.74573	-4.70849	-4.6668	-4.61984	-4.56661	-4.5058	-4.43577	-4.35437	-4.25877	-4.14522	-4.00868	-3.84249	-3.63823	-3.38682	-3.0826	-2.73041	-2.34574	-1.94046	-1.5231	-1.12267	-0.777727	-0.501874	-0.285591	-0.114113	0.0246028	0.139097
2.63906		-5.32615	-5.31881	-5.31109	-5.30295	-5.29436	-5.28529	-5.27569	-5.26551	-5.25471	-5.24323	-5.23099	-5.21792	-5.20394	-5.18895	-5.17283	-5.15546	-5.13668	-5.11632	-5.09417	-5.06999	-5.04348	-5.0143	-4.98201	-4.94611	-4.90595	-4.86072	-4.80939	-4.75065	-4.68276	-4.6034	-4.5094	-4.39637	-4.25802	-4.08531	-3.86542	-3.58183	-3.22063	-2.79132	-2.3414	-1.90807	-1.48738	-1.08791	-0.73947	-0.454605	-0.225207	-0.0385702	0.115516	0.244379
2.77259		-5.06291	-5.05648	-5.04972	-5.04259	-5.03508	-5.02715	-5.01875	-5.00986	-5.00042	-4.99038	-4.97967	-4.96824	-4.956	-4.94286	-4.92872	-4.91347	-4.89695	-4.87901	-4.85944	-4.83803	-4.8145	-4.78849	-4.75962	-4.72737	-4.6911	-4.65001	-4.60308	-4.54896	-4.48584	-4.41129	-4.32191	-4.21285	-4.07698	-3.90368	-3.67721	-3.37628	-2.983	-2.51692	-2.05462	-1.63713	-1.24254	-0.87491	-0.562752	-0.314482	-0.118767	0.0387819	0.168983	0.27895
2.83321		-3.48774	-3.48216	-3.47634	-3.47025	-3.46388	-3.4572	-3.45019	-3.44282	-3.43505	-3.42685	-3.41819	-3.40901	-3.39926	-3.38888	-3.37781	-3.36595	-3.35323	-3.33953	-3.32473	-3.30867	-3.29118	-3.27206	-3.25104	-3.22783	-3.20206	-3.17328	-3.14094	-3.10434	-3.06263	-3.01473	-2.95927	-2.89452	-2.81825	-2.72761	-2.61891	-2.48729	-2.32629	-2.12721	-1.87979	-1.57855	-1.23921	-0.905898	-0.61996	-0.391749	-0.211193	-0.0650951	0.0566306	0.160716
2.94444		-3.62325	-3.61639	-3.60918	-3.60159	-3.5936	-3.58518	-3.57628	-3.56687	-3.5569	-3.54634	-3.53511	-3.52316	-3.51043	-3.49683	-3.48228	-3.46668	-3.44992	-3.43187	-3.41237	-3.39126	-3.36834	-3.34337	-3.31609	-3.28617	-3.25321	-3.21676	-3.17625	-3.13099	-3.08011	-3.02257	-2.95704	-2.88186	-2.79496	-2.69371	-2.57478	-2.43374	-2.2644	-2.05764	-1.8013	-1.48691	-1.12995	-0.780092	-0.483334	-0.249188	-0.0654547	0.0820736	0.203727	0.306304
3.04452		-4.77783	-4.77099	-4.76379	-4.75619	-4.74818	-4.73971	-4.73074	-4.72122	-4.71111	-4.70035	-4.68887	-4.6766	-4.66346	-4.64934	-4.63413	-4.61771	-4.59992	-4.58058	-4.55948	-4.53637	-4.51096	-4.48286	-4.45165	-4.41677	-4.37752	-4.33304	-4.28222	-4.22358	-4.15519	-4.07443	-3.97765	-3.85974	-3.71339	-3.52824	-3.29052	-2.98624	-2.6152	-2.21189	-1.82175	-1.44656	-1.07578	-0.73139	-0.441261	-0.209169	-0.0237847	0.127135	0.252518	0.358396
3.13549		-3.06262	-3.05801	-3.05318	-3.0481	-3.04275	-3.03712	-3.03117	-3.02488	-3.01822	-3.01116	-3.00365	-2.99566	-2.98713	-2.978	-2.96822	-2.95771	-2.94638	-2.93414	-2.92087	-2.90643	-2.89067	-2.8734	-2.8544	-2.8334	-2.81009	-2.78409	-2.75492	-2.722	-2.68463	-2.64192	-2.59274	-2.53563	-2.46869	-2.38932	-2.29391	-2.17722	-2.0314	-1.84496	-1.60326	-1.29743	-0.947241	-0.607994	-0.325302	-0.10478	0.0682814	0.208883	0.327187	0.429296
3.2581		-2.98218	-2.97616	-2.96984	-2.96322	-2.95626	-2.94893	-2.94122	-2.93308	-2.92448	-2.91538	-2.90574	-2.8955	-2.88461	-2.873	-2.8606	-2.84733	-2.8331	-2.8178	-2.8013	-2.78346	-2.76413	-2.7431	-2.72017	-2.69507	-2.6675	-2.6371	-2.60344	-2.566	-2.52414	-2.47709	-2.42384	-2.36308	-2.29306	-2.21135	-2.11447	-1.9973	-1.85223	-1.66842	-1.43318	-1.14146	-0.815199	-0.503894	-0.244689	-0.0409629	0.120289	0.252245	0.364031	0.46129
3.3673		-2.5306	-2.52567	-2.52052	-2.51512	-2.50946	-2.50353	-2.49729	-2.49072	-2.48381	-2.47652	-2.46881	-2.46067	-2.45203	-2.44287	-2.43313	-2.42275	-2.41168	-2.39984	-2.38714	-2.3735	-2.35881	-2.34293	-2.32572	-2.30699	-2.28654	-2.26409	-2.23933	-2.21183	-2.18108	-2.14639	-2.10683	-2.06116	-2.00763	-1.94372	-1.86577	-1.76829	-1.64316	-1.47911	-1.26399	-0.995413	-0.698339	-0.419718	-0.190679	-0.0122883	0.127409	0.240076	0.33394	0.414353
3.46574		-2.48435	-2.47955	-2.47452	-2.46926	-2.46374	-2.45795	-2.45186	-2.44545	-2.43869	-2.43155	-2.42401	-2.41602	-2.40754	-2.39853	-2.38893	-2.3787	-2.36775	-2.35601	-2.3434	-2.32982	-2.31514	-2.29922	-2.28191	-2.26301	-2.24229	-2.21946	-2.19418	-2.16601	-2.13439	-2.0986	-2.05768	-2.01033	-1.95472	-1.88821	-1.8069	-1.70486	-1.57312	-1.39901	-1.16889	-0.881602	-0.569063	-0.28458	-0.056964	0.117932	0.254494	0.364558	0.455794	0.533013
3.55535		-2.47873	-2.47329	-2.46761	-2.46167	-2.45545	-2.44892	-2.44207	-2.43487	-2.42729	-2.4193	-2.41088	-2.40197	-2.39254	-2.38253	-2.37191	-2.36059	-2.34852	-2.33562	-2.32179	-2.30693	-2.29092	-2.27361	-2.25484	-2.23441	-2.21208	-2.18755	-2.16046	-2.13036	-2.09667	-2.05862	-2.01522	-1.9651	-1.90638	-1.83636	-1.7511	-1.64472	-1.50848	-1.33029	-1.09786	-0.811885	-0.504575	-0.226391	-0.00331395	0.169501	0.306195	0.418224	0.512837	0.594379
3.66356		-2.43749	-2.43276	-2.42779	-2.42258	-2.4171	-2.41133	-2.40526	-2.39884	-2.39206	-2.38487	-2.37726	-2.36916	-2.36055	-2.35136	-2.34154	-2.33103	-2.31973	-2.30757	-2.29443	-2.2802	-2.26475	-2.24788	-2.22942	-2.20911	-2.18667	-2.16174	-2.13387	-2.10251	-2.06695	-2.02629	-1.97934	-1.92455	-1.8598	-1.7822	-1.68773	-1.57068	-1.42303	-1.23442	-0.995444	-0.709121	-0.405147	-0.127655	0.0995781	0.279225	0.423102	0.541452	0.64106	0.726185
3.78419		-2.43693	-2.43113	-2.42503	-2.41862	-2.41187	-2.40475	-2.39724	-2.38929	-2.38088	-2.37197	-2.36251	-2.35245	-2.34174	-2.33032	-2.31812	-2.30507	-2.29108	-2.27606	-2.25989	-2.24246	-2.22363	-2.20322	-2.18106	-2.15692	-2.13054	-2.10158	-2.06965	-2.03425	-1.99472	-1.9502	-1.89953	-1.84111	-1.77272	-1.69118	-1.59186	-1.46809	-1.31047	-1.10759	-0.851921	-0.555039	-0.257129	-0.000108807	0.204115	0.365736	0.498117	0.610647	0.70876	0.795416
3.8712		-2.40769	-2.4029	-2.39787	-2.39258	-2.38701	-2.38113	-2.37492	-2.36836	-2.3614	-2.35402	-2.34617	-2.3378	-2.32888	-2.31933	-2.3091	-2.29809	-2.28624	-2.27343	-2.25955	-2.24446	-2.228	-2.20997	-2.19015	-2.16826	-2.14397	-2.11686	-2.08644	-2.05208	-2.01296	-1.96804	-1.91597	-1.85487	-1.78221	-1.69438	-1.58616	-1.44999	-1.27542	-1.05066	-0.771365	-0.458639	-0.160273	0.0880032	0.284671	0.443534	0.57661	0.690852	0.789895	0.875886
3.98898		-2.24882	-2.24334	-2.2376	-2.23156	-2.2252	-2.2185	-2.21143	-2.20396	-2.19606	-2.18768	-2.17879	-2.16934	-2.15927	-2.14853	-2.13705	-2.12474	-2.11153	-2.0973	-2.08194	-2.06532	-2.04726	-2.0276	-2.00609	-1.98248	-1.95644	-1.92759	-1.89543	-1.85936	-1.8186	-1.77215	-1.71869	-1.6564	-1.58281	-1.49442	-1.38619	-1.25103	-1.07944	-0.86146	-0.594929	-0.300431	-0.0203323	0.214039	0.400701	0.551753	0.67846	0.787651	0.882888	0.966123
4.07754		-2.31522	-2.30989	-2.30429	-2.29841	-2.29222	-2.28569	-2.2788	-2.27153	-2.26382	-2.25565	-2.24697	-2.23774	-2.22789	-2.21737	-2.20611	-2.19401	-2.181	-2.16695	-2.15174	-2.13522	-2.11721	-2.0975	-2.07584	-2.05192	-2.02538	-1.99577	-1.96251	-1.92491	-1.88207	-1.83284	-1.7757	-1.70865	-1.62896	-1.53294	-1.41544	-1.26955	-1.0866	-0.858521	-0.585835	-0.290197	-0.0114405	0.221582	0.406485	0.554462	0.677027	0.782081	0.874284	0.956205
4.18965		-1.98375	-1.97841	-1.97279	-1.96688	-1.96064	-1.95406	-1.9471	-1.93974	-1.93193	-1.92365	-1.91484	-1.90546	-1.89545	-1.88477	-1.87333	-1.86106	-1.84788	-1.83369	-1.81838	-1.80183	-1.7839	-1.76441	-1.74319	-1.71998	-1.69453	-1.66648	-1.63542	-1.60081	-1.56194	-1.51786	-1.46727	-1.40834	-1.33843	-1.25367	-1.14833	-1.01395	-0.838982	-0.611458	-0.330902	-0.0275197	0.246961	0.464852	0.632712	0.766613	0.878295	0.974238	1.05781	1.13092
4.29046		-1.76523	-1.7609	-1.75634	-1.75156	-1.74653	-1.74123	-1.73564	-1.72973	-1.72349	-1.71687	-1.70984	-1.70237	-1.69442	-1.68592	-1.67684	-1.6671	-1.65663	-1.64535	-1.63316	-1.61994	-1.60555	-1.58983	-1.57259	-1.55358	-1.5325	-1.509	-1.4826	-1.45273	-1.41863	-1.37932	-1.33347	-1.27933	-1.21449	-1.13567	-1.03835	-0.91651	-0.762858	-0.570849	-0.340528	-0.0866026	0.163195	0.385636	0.573944	0.732316	0.867182	0.983577	1.08483	1.17318
4.39445		-1.46529	-1.46167	-1.45786	-1.45386	-1.44965	-1.44522	-1.44054	-1.4356	-1.43036	-1.42481	-1.41891	-1.41263	-1.40593	-1.39876	-1.39107	-1.38281	-1.37389	-1.36425	-1.35378	-1.34238	-1.32991	-1.3162	-1.30108	-1.28429	-1.26556	-1.24452	-1.22072	-1.19359	-1.16236	-1.12607	-1.08339	-1.03252	-0.970944	-0.895072	-0.799787	-0.677953	-0.520666	-0.320436	-0.0806321	0.17383	0.406791	0.599137	0.753957	0.881292	0.988763	1.08065	1.15941	1.22686
4.49981		-1.44394	-1.43898	-1.43375	-1.42825	-1.42244	-1.41629	-1.40979	-1.40289	-1.39556	-1.38777	-1.37945	-1.37056	-1.36104	-1.35082	-1.33981	-1.32794	-1.31508	-1.30112	-1.28592	-1.26929	-1.25104	-1.23093	-1.20866	-1.1839	-1.15621	-1.12509	-1.0899	-1.04988	-1.00404	-0.951206	-0.889852	-0.818082	-0.733494	-0.633074	-0.513175	-0.36985	-0.200178	-0.00536177	0.205327	0.414982	0.607577	0.776147	0.921827	1.04848	1.15948	1.25714	1.34309	1.41869
4.59512		-1.74848	-1.74381	-1.73891	-1.73375	-1.72833	-1.72261	-1.71658	-1.7102	-1.70345	-1.69628	-1.68867	-1.68057	-1.67193	-1.66269	-1.65279	-1.64214	-1.63067	-1.61826	-1.6048	-1.59014	-1.5741	-1.55648	-1.53702	-1.5154	-1.49125	-1.46407	-1.43323	-1.39796	-1.35721	-1.30961	-1.25335	-1.18592	-1.10391	-1.00246	-0.874738	-0.711199	-0.499761	-0.230365	0.0893996	0.416334	0.695421	0.908079	1.06763	1.19163	1.29193	1.37542	1.44619	1.50686
4.70048		-1.40997	-1.40553	-1.40087	-1.39597	-1.39082	-1.38539	-1.37966	-1.37361	-1.3672	-1.36041	-1.3532	-1.34553	-1.33735	-1.3286	-1.31924	-1.30918	-1.29834	-1.28663	-1.27394	-1.26013	-1.24505	-1.22851	-1.21028	-1.19007	-1.16756	-1.1423	-1.11375	-1.08123	-1.04382	-1.00032	-0.949095	-0.8879	-0.813533	-0.721389	-0.604789	-0.454376	-0.258794	-0.0106467	0.277475	0.562185	0.799647	0.981262	1.12108	1.23355	1.32753	1.40786	1.47731	1.53774
4.80402		0.0354288	0.0393943	0.0435556	0.0479281	0.052529	0.0573773	0.0624944	0.0679041	0.0736332	0.079712	0.0861746	0.0930597	0.100411	0.108281	0.116725	0.125811	0.135617	0.146233	0.157765	0.170335	0.184092	0.199209	0.215893	0.234393	0.255009	0.278101	0.304107	0.333552	0.36707	0.405409	0.449436	0.500109	0.558399	0.625127	0.700675	0.78459	0.875214	0.969624	1.06413	1.15521	1.2403	1.31809	1.38821	1.4509	1.50667	1.55616	1.60001	1.63886
4.90527		-0.596307	-0.591973	-0.587422	-0.582638	-0.577603	-0.572297	-0.566699	-0.560785	-0.554528	-0.547899	-0.540864	-0.533387	-0.525426	-0.516934	-0.507859	-0.498139	-0.487705	-0.476479	-0.464367	-0.451262	-0.43704	-0.42155	-0.404615	-0.38602	-0.365505	-0.342746	-0.317343	-0.288786	-0.256428	-0.219424	-0.176668	-0.126689	-0.0675202	0.00346548	0.0897012	0.195401	0.32493	0.480774	0.659685	0.849531	1.03274	1.19584	1.33458	1.45112	1.54946	1.6332	1.70507	1.76712
5.01064		-0.465409	-0.461198	-0.456773	-0.452117	-0.44721	-0.442034	-0.436566	-0.43078	-0.424649	-0.418141	-0.411221	-0.40385	-0.395981	-0.387564	-0.37854	-0.36884	-0.358386	-0.347086	-0.334833	-0.321499	-0.306934	-0.290955	-0.273342	-0.253827	-0.232076	-0.207676	-0.180104	-0.148693	-0.112584	-0.0706593	-0.021452	0.0369725	0.107156	0.192372	0.296612	0.424072	0.577469	0.754515	0.944139	1.12816	1.29074	1.42586	1.53565	1.6251	1.699	1.76106	1.81398	1.8597
5.11199		0.242208	0.246072	0.250114	0.254346	0.258782	0.263436	0.268323	0.273461	0.278868	0.284566	0.290578	0.296931	0.303654	0.31078	0.318346	0.326395	0.334977	0.344146	0.35397	0.364524	0.375899	0.388203	0.401565	0.416141	0.432124	0.449752	0.469323	0.491215	0.515914	0.544049	0.576445	0.614188	0.658711	0.711888	0.77608	0.854047	0.948437	1.06052	1.1881	1.32393	1.45727	1.5786	1.68337	1.77167	1.84585	1.90865	1.96243	2.00901
5.22036		0.518461	0.522283	0.526292	0.530502	0.534927	0.539583	0.54449	0.549665	0.555132	0.560914	0.56704	0.573539	0.580446	0.5878	0.595646	0.604033	0.613022	0.622678	0.633082	0.644326	0.65652	0.669796	0.684311	0.700258	0.717873	0.737447	0.759344	0.784021	0.812059	0.844195	0.881373	0.924787	0.975924	1.03656	1.10861	1.19372	1.29237	1.40258	1.519	1.63384	1.73981	1.83288	1.91248	1.98015	2.038	2.08797	2.13157	2.16997
5.32301		0.897287	0.901004	0.904903	0.908998	0.913303	0.917832	0.922604	0.927638	0.932953	0.938573	0.944522	0.95083	0.957526	0.964647	0.97223	0.980319	0.988963	0.998218	1.00815	1.01882	1.03032	1.04275	1.05621	1.07083	1.08677	1.10421	1.12336	1.14448	1.1679	1.19398	1.22319	1.25609	1.29331	1.33558	1.38365	1.4382	1.49957	1.56756	1.64104	1.7179	1.79532	1.87041	1.94086	2.00536	2.06347	2.1154	2.16166	2.2029
5.42495		1.1971	1.2008	1.2047	1.2088	1.21313	1.2177	1.22253	1.22766	1.2331	1.23888	1.24503	1.2516	1.25861	1.26612	1.27417	1.28282	1.29214	1.30219	1.31305	1.32481	1.33756	1.35142	1.36649	1.38291	1.40081	1.42031	1.44156	1.46469	1.4898	1.51699	1.54629	1.5777	1.61115	1.64654	1.68367	1.72232	1.76223	1.8031	1.84458	1.88628	1.92775	1.96851	2.00803	2.04585	2.08156	2.11489	2.14567	2.17387
5.52545		0.994685	0.998238	1.00198	1.00592	1.01008	1.01448	1.01913	1.02407	1.02931	1.03489	1.04084	1.04719	1.05399	1.06129	1.06914	1.07761	1.08677	1.0967	1.1075	1.11928	1.13219	1.14638	1.16204	1.1794	1.19872	1.22033	1.24462	1.27207	1.30324	1.33881	1.37956	1.42638	1.48011	1.54142	1.61041	1.68614	1.76618	1.84674	1.92353	1.99312	2.05381	2.10562	2.14956	2.18698	2.21919	2.24724	2.27196	2.29396
5.63121		1.29363	1.29612	1.29874	1.30151	1.30442	1.30751	1.31077	1.31423	1.3179	1.3218	1.32597	1.33041	1.33517	1.34027	1.34575	1.35166	1.35805	1.36497	1.3725	1.38072	1.38971	1.3996	1.41052	1.42263	1.43613	1.45125	1.46829	1.48762	1.50969	1.53504	1.56437	1.59852	1.63849	1.68538	1.74032	1.80414	1.87692	1.95732	2.04224	2.12719	2.20754	2.28	2.34321	2.3974	2.44364	2.48325	2.51746	2.5473
5.73334		1.60324	1.60574	1.60837	1.61113	1.61405	1.61714	1.6204	1.62386	1.62753	1.63144	1.63559	1.64003	1.64477	1.64985	1.65531	1.66118	1.66751	1.67435	1.68176	1.68981	1.69857	1.70814	1.71861	1.73009	1.74271	1.75661	1.77196	1.78893	1.80772	1.82852	1.85157	1.87707	1.90523	1.93627	1.97033	2.00753	2.04792	2.09142	2.13781	2.18666	2.23728	2.28873	2.33988	2.38955	2.4367	2.48054	2.52063	2.55683
5.83773		2.04359	2.04614	2.04878	2.05153	2.05438	2.05734	2.06042	2.06362	2.06695	2.07042	2.07403	2.07779	2.08172	2.08582	2.0901	2.09459	2.09928	2.10421	2.10939	2.11483	2.12058	2.12665	2.13308	2.13992	2.14721	2.15501	2.1634	2.17245	2.18226	2.19297	2.20471	2.21767	2.23204	2.24806	2.266	2.28613	2.30872	2.33396	2.36196	2.39261	2.42558	2.46025	2.49579	2.53122	2.56562	2.59823	2.62852	2.65623
5.94017		2.09139	2.09395	2.09663	2.09943	2.10235	2.10542	2.10863	2.11201	2.11555	2.11927	2.12319	2.12733	2.13169	2.13629	2.14116	2.14632	2.15178	2.15759	2.16376	2.17033	2.17733	2.18481	2.19282	2.2014	2.21061	2.22053	2.23124	2.24282	2.25539	2.26906	2.28399	2.30033	2.31826	2.33797	2.35964	2.3834	2.40934	2.43742	2.46745	2.49903	2.53157	2.56437	2.59663	2.62765	2.65684	2.68383	2.70844	2.73066
6.04263		1.90596	1.9089	1.91199	1.91525	1.91868	1.9223	1.92613	1.93019	1.93449	1.93905	1.94391	1.94908	1.9546	1.9605	1.96682	1.9736	1.98088	1.98872	1.99718	2.00633	2.01623	2.02698	2.03865	2.05137	2.06523	2.08037	2.0969	2.11497	2.13471	2.15625	2.17972	2.2052	2.23273	2.2623	2.29384	2.32718	2.3621	2.39829	2.43542	2.47316	2.51115	2.54907	2.58659	2.62342	2.65924	2.69376	2.72673	2.75793
6.14633		2.24288	2.24416	2.24551	2.24692	2.2484	2.24996	2.25161	2.25334	2.25518	2.25712	2.25918	2.26136	2.26369	2.26617	2.26882	2.27166	2.2747	2.27798	2.28152	2.28535	2.2895	2.29403	2.29898	2.30441	2.3104	2.31702	2.32437	2.33259	2.3418	2.35218	2.36392	2.37726	2.39245	2.40977	2.42951	2.4519	2.47713	2.50521	2.53594	2.56884	2.60316	2.63791	2.67207	2.7047	2.73511	2.76286	2.7878	2.80998
6.24804		2.42691	2.42782	2.42877	2.42978	2.43083	2.43195	2.43312	2.43436	2.43568	2.43707	2.43855	2.44012	2.4418	2.44359	2.4455	2.44756	2.44977	2.45215	2.45472	2.4575	2.46052	2.46381	2.4674	2.47134	2.47566	2.48042	2.48568	2.49151	2.49799	2.5052	2.51326	2.52226	2.53232	2.54356	2.55609	2.57002	2.58539	2.60224	2.62049	2.64002	2.66059	2.68188	2.70353	2.72512	2.74628	2.76667	2.78602	2.80418
6.35263		2.46819	2.46954	2.47096	2.47245	2.47402	2.47567	2.47741	2.47924	2.48117	2.48322	2.48539	2.48768	2.49012	2.49271	2.49548	2.49842	2.50157	2.50494	2.50856	2.51245	2.51663	2.52114	2.52601	2.53129	2.537	2.54321	2.54995	2.55728	2.56525	2.57393	2.58336	2.59358	2.60464	2.61656	2.62932	2.64291	2.65726	2.67226	2.68777	2.70363	2.71962	2.73555	2.75122	2.76644	2.78107	2.795	2.80814	2.82046
6.4552		2.40464	2.40685	2.40917	2.4116	2.41415	2.41683	2.41966	2.42262	2.42575	2.42905	2.43253	2.43621	2.4401	2.44422	2.44859	2.45322	2.45815	2.46338	2.46896	2.47491	2.48127	2.48806	2.49535	2.50317	2.51157	2.52063	2.5304	2.54097	2.55241	2.56482	2.57829	2.59292	2.6088	2.62599	2.64453	2.66442	2.68558	2.70785	2.73099	2.75467	2.77851	2.8021	2.82503	2.84697	2.86766	2.88692	2.90467	2.92092
6.5582		2.65588	2.65728	2.65876	2.6603	2.66192	2.66362	2.66541	2.66729	2.66927	2.67136	2.67356	2.67589	2.67835	2.68096	2.68372	2.68665	2.68977	2.69308	2.69661	2.70037	2.70438	2.70865	2.71323	2.71811	2.72334	2.72892	2.7349	2.74128	2.7481	2.75537	2.76311	2.77133	2.78004	2.78923	2.79889	2.80898	2.81946	2.83029	2.84139	2.85268	2.86407	2.87548	2.88681	2.89798	2.90891	2.91952	2.92977	2.93961
6.66058		2.8	2.80125	2.80255	2.80391	2.80531	2.80677	2.8083	2.80988	2.81153	2.81325	2.81504	2.81691	2.81887	2.82091	2.82305	2.82529	2.82763	2.83008	2.83265	2.83535	2.83817	2.84114	2.84424	2.8475	2.85091	2.85448	2.85822	2.86213	2.86622	2.87048	2.87491	2.87952	2.88429	2.88922	2.89431	2.89953	2.90488	2.91033	2.91587	2.92147	2.92711	2.93276	2.93841	2.94401	2.94957	2.95504	2.96041	2.96566
6.76388		2.83252	2.83411	2.83577	2.8375	2.8393	2.84118	2.84314	2.84518	2.84731	2.84953	2.85185	2.85426	2.85678	2.85941	2.86215	2.865	2.86796	2.87104	2.87424	2.87756	2.881	2.88456	2.88824	2.89202	2.89591	2.89991	2.90399	2.90816	2.9124	2.91669	2.92103	2.92541	2.92979	2.93418	2.93854	2.94287	2.94716	2.95137	2.95551	2.95957	2.96352	2.96736	2.97109	2.97469	2.97817	2.98152	2.98474	2.98784
6.86693		2.50754	2.50931	2.51118	2.51316	2.51524	2.51743	2.51976	2.52223	2.52485	2.52764	2.53061	2.53379	2.53719	2.54083	2.54476	2.54898	2.55355	2.55849	2.56386	2.56971	2.5761	2.5831	2.59078	2.59924	2.60857	2.61887	2.63028	2.64291	2.65689	2.67232	2.68929	2.70785	2.72796	2.7495	2.77222	2.79578	2.81971	2.84346	2.86651	2.88837	2.90869	2.92723	2.94391	2.95875	2.97184	2.98335	2.99344	3.00229
6.97073		2.8636	2.86488	2.8662	2.86757	2.86898	2.87044	2.87196	2.87353	2.87515	2.87683	2.87856	2.88036	2.88222	2.88415	2.88614	2.8882	2.89033	2.89253	2.89481	2.89715	2.89957	2.90207	2.90464	2.90728	2.91	2.91279	2.91565	2.91857	2.92156	2.92461	2.92771	2.93086	2.93405	2.93728	2.94054	2.94382	2.94711	2.95042	2.95372	2.95701	2.96028	2.96352	2.96673	2.96991	2.97303	2.9761	2.97911	2.98206
7.07327		2.95207	2.95273	2.9534	2.9541	2.95482	2.95556	2.95633	2.95711	2.95793	2.95876	2.95962	2.96051	2.96143	2.96237	2.96334	2.96433	2.96535	2.96641	2.96749	2.96859	2.96973	2.97089	2.97209	2.97331	2.97455	2.97582	2.97712	2.97845	2.97979	2.98116	2.98255	2.98397	2.9854	2.98684	2.9883	2.98978	2.99126	2.99276	2.99426	2.99576	2.99727	2.99878	3.00028	3.00178	3.00328	3.00476	3.00624	3.0077
7.17625		2.97855	2.97906	2.97958	2.98011	2.98065	2.98121	2.98178	2.98236	2.98295	2.98356	2.98418	2.98481	2.98545	2.98611	2.98678	2.98746	2.98816	2.98886	2.98958	2.99031	2.99106	2.99181	2.99258	2.99335	2.99414	2.99494	2.99575	2.99656	2.99739	2.99823	2.99907	2.99992	3.00077	3.00164	3.0025	3.00338	3.00425	3.00513	3.00601	3.00689	3.00778	3.00866	3.00954	3.01043	3.0113	3.01218	3.01305	3.01392
7.28001		3.04138	3.04141	3.04145	3.04148	3.04151	3.04155	3.04158	3.04162	3.04165	3.04169	3.04172	3.04175	3.04179	3.04182	3.04186	3.04189	3.04193	3.04196	3.042	3.04203	3.04207	3.0421	3.04214	3.04217	3.04221	3.04224	3.04228	3.04231	3.04235	3.04238	3.04242	3.04245	3.04248	3.04252	3.04255	3.04259	3.04262	3.04266	3.04269	3.04273	3.04276	3.0428	3.04283	3.04287	3.04291	3.04294	3.04298	3.04301
7.38275		3.02749	3.02831	3.02916	3.03004	3.03097	3.03194	3.03295	3.034	3.03511	3.03627	3.03748	3.03874	3.04007	3.04145	3.04291	3.04443	3.04602	3.04768	3.04942	3.05125	3.05315	3.05514	3.05722	3.05938	3.06164	3.06399	3.06643	3.06897	3.07159	3.07431	3.07711	3.07999	3.08296	3.086	3.0891	3.09227	3.09549	3.09874	3.10204	3.10535	3.10867	3.112	3.11531	3.1186	3.12186	3.12508	3.12824	3.13135
7.48605		3.24662	3.24667	3.24671	3.24676	3.2468	3.24685	3.24689	3.24694	3.24698	3.24703	3.24708	3.24712	3.24717	3.24721	3.24726	3.2473	3.24735	3.2474	3.24744	3.24749	3.24753	3.24758	3.24763	3.24767	3.24772	3.24777	3.24781	3.24786	3.24791	3.24795	3.248	3.24804	3.24809	3.24814	3.24818	3.24823	3.24828	3.24832	3.24837	3.24842	3.24846	3.24851	3.24856	3.2486	3.24865	3.2487	3.24874	3.24879
7.58883		3.28655	3.28658	3.28662	3.28665	3.28669	3.28672	3.28676	3.28679	3.28683	3.28686	3.2869	3.28694	3.28697	3.28701	3.28704	3.28708	3.28711	3.28715	3.28718	3.28722	3.28726	3.28729	3.28733	3.28736	3.2874	3.28744	3.28747	3.28751	3.28754	3.28758	3.28762	3.28765	3.28769	3.28772	3.28776	3.2878	3.28783	3.28787	3.2879	3.28794	3.28798	3.28801	3.28805	3.28809	3.28812	3.28816	3.28819	3.28823
7.69211		3.26431	3.26431	3.26431	3.26431	3.26431	3.26431	3.26431	3.26431	3.26431	3.26431	3.26431	3.26431	3.26431	3.26431	3.26431	3.26431	3.26431	3.26431	3.26431	3.26431	3.26431	3.26431	3.26431	3.26431	3.26431	3.26431	3.26431	3.26431	3.26431	3.26431	3.26431	3.26431	3.26431	3.26431	3.26431	3.26431	3.26431	3.26431	3.26431	3.26431	3.26431	3.26431	3.26431	3.26431	3.26431	3.26431	3.26431	3.26431
[truncated: 33 more columns]
