# Supplementary material for: Multifractal analysis of vegetation regulation on ecohydrological processes in a small watershed
Source: PeerJ journal article supplement (doi:10.7717/peerj.20496), 2026-01-12
Supplement: Figure_5_data.zip [file Fractional vegetation cover.xlsx]

## Sheet: Sheet1
year	month	FVC	FVC*100
2017	1	0.632155	63.2155
2017	2	0.588531	58.8531
2017	3	0.685129	68.5129
2017	4	0.589764	58.9764
2017	5	0.556619	55.6619
2017	6	0.614034	61.4034
2017	7	0.545096	54.5096
2017	8	0.469906	46.9906
2017	9	0.560946	56.0946
2017	10	0.495538	49.5538
2017	11	0.522347	52.2347
2017	12	0.492357	49.2357
2018	1	0.579056	57.9056
2018	2	0.566683	56.6683
2018	3	0.513244	51.3244
2018	4	0.508873	50.8873
2018	5	0.599161	59.9161
2018	6	0.645241	64.5241
2018	7	0.450487	45.0487
2018	8	0.543948	54.3948
2018	9	0.462118	46.2118
2018	10	0.800516	80.0516
2018	11	0.786645	78.6645
2018	12	0.161251	16.1251
2019	1	0.244743	24.4743
2019	2	0.656784	65.6784
2019	3	0.567975	56.7975
2019	4	0.524382	52.4382
2019	5	0.58832	58.832
2019	6	0.502348	50.2348
2019	7	0.632072	63.2072
2019	8	0.537399	53.7399
2019	9	0.631679	63.1679
2019	10	0.555784	55.5784
2019	11	0.225703	22.5703
2019	12	0.281777	28.1777
2020	1	0.677432	67.7432
2020	2	0.360812	36.0812
2020	3	0.434239	43.4239
2020	4	0.534069	53.4069
2020	5	0.613457	61.3457
2020	6	0.651232	65.1232
2020	7	0.587078	58.7078
2020	8	0.572288	57.2288
2020	9	0.507847	50.7847
2020	10	0.538835	53.8835
2020	11	0.547058	54.7058
2020	12	0.483412	48.3412
2021	1	0.43621	43.621
2021	2	0.467814	46.7814
2021	3	0.528828	52.8828
2021	4	0.560681	56.0681
2021	5	0.628042	62.8042
2021	6	0.617272	61.7272
2021	7	0.534749	53.4749
2021	8	0.552981	55.2981
2021	9	0.633959	63.3959
2021	10	0.559495	55.9495
2021	11	0.499343	49.9343
2021	12	0.522052	52.2052
2022	1	0.492845	49.2845
2022	2	0.47629	47.629
2022	3	0.471953	47.1953
2022	4	0.552864	55.2864
2022	5	0.582015	58.2015
2022	6	0.638546	63.8546
2022	7	0.540515	54.0515
2022	8	0.602779	60.2779
2022	9	0.57507	57.507
2022	10	0.619322	61.9322
2022	11	0.60674	60.674
2022	12	0.550415	55.0415
