# Supplementary material for: Multifractal analysis of vegetation regulation on ecohydrological processes in a small watershed
Source: PeerJ journal article supplement (doi:10.7717/peerj.20496), 2026-01-12
Supplement: Figure_5_data.zip [file Sliding-window hh.xlsx]

## Sheet: Sheet1
year	month	∆h
2017	12	1.12545
2018	1	0.890268
2018	2	0.967695
2018	3	0.913228
2018	4	1.01448
2018	5	0.785873
2018	6	1.10761
2018	7	0.682308
2018	8	0.814818
2018	9	0.410073
2018	10	1.10818
2018	11	1.28996
2018	12	0.925952
2019	1	0.813249
2019	2	0.7935
2019	3	0.811557
2019	4	0.792464
2019	5	0.759384
2019	6	0.498269
2019	7	0.804048
2019	8	0.70803
2019	9	0.91861
2019	10	0.78001
2019	11	0.927362
2019	12	0.804389
2020	1	1.64103
2020	2	0.499584
2020	3	1.11559
2020	4	1.17138
2020	5	1.14903
2020	6	0.927436
2020	7	1.26308
2020	8	0.928362
2020	9	1.03691
2020	10	0.996092
2020	11	1.02437
2020	12	0.840716
2021	1	0.534646
2021	2	0.505069
2021	3	1.06287
2021	4	1.0893
2021	5	0.697953
2021	6	0.414664
2021	7	0.559882
2021	8	0.501957
2021	9	0.522798
2021	10	0.759067
2021	11	0.770374
2021	12	0.688502
2022	1	1.10352
2022	2	1.27598
2022	3	0.925202
2022	4	1.36353
2022	5	0.831351
2022	6	1.29137
2022	7	1.04723
2022	8	1.4608
2022	9	1.46999
2022	10	1.59462
2022	11	1.63684
2022	12	1.13589
