# Supplementary material for: Multifractal analysis of vegetation regulation on ecohydrological processes in a small watershed
Source: PeerJ journal article supplement (doi:10.7717/peerj.20496), 2026-01-12
Supplement: Figure_6_data.zip [file Correlation coeffcient.xlsx]

## Sheet: Sheet1
Season	r
Spring	-0.0701713
Summer	0.542014
Autumn	0.34115
Winter	0.421499
