# Supplementary material for: Multifractal analysis of vegetation regulation on ecohydrological processes in a small watershed
Source: PeerJ journal article supplement (doi:10.7717/peerj.20496), 2026-01-12
Supplement: Figure_7_data.zip [file Monthly average precipitation.xlsx]

## Sheet: Sheet1
	Jan.	Feb.	Mar.	Apr.	May.	Jun.	Jul.	Aug.	Sept.	Oct.	Nov.	Dec.
2017	32.68	123.74	201.31	499.25	630.42	712.51	367.12	304.72	783.14	662.59	94.36	27.03
2018	87.71	54.55	216.99	577.51	600.1	324.71	395.68	374.98	484.34	178.07	225.1	64.59
2019	47.4	11.03	194.9	287.33	428.71	736.92	590.72	387.73	232.66	556.2	178.1	60.99
2020	90.2	109.01	257.07	263.55	379.51	845.76	1069.47	172.17	451.24	441.32	120.39	54.11
2021	62.82	90.6	249.2	346.1	502.26	506.78	675.14	1215.27	545.99	377.59	167.79	70.07
2022	86.09	53.59	245.97	560.23	404.5	584.77	426.84	161.48	362.09	236.46	91.31	53.58
