# Supplementary material for: Multifractal analysis of vegetation regulation on ecohydrological processes in a small watershed
Source: PeerJ journal article supplement (doi:10.7717/peerj.20496), 2026-01-12
Supplement: Figure_7_data.zip [file Monthly FVC.xlsx]

## Sheet: Sheet1
	Jan.	Feb.	Mar.	Apr.	May.	Jun.	Jul.	Aug.	Sept.	Oct.	Nov.	Dec.
2017	63.2155	58.8531	68.5129	58.9764	55.6619	61.4034	54.5095	46.9906	56.0946	49.5538	52.2347	49.2357
2018	57.9056	56.6683	51.3244	50.8873	59.9161	64.5241	45.0487	54.3948	46.2118	80.0516	78.6645	16.1251
2019	24.4743	65.6784	56.7975	52.4382	58.832	50.2348	63.2072	53.7399	63.1679	55.5784	22.5703	28.1777
2020	67.7432	36.0812	43.4239	53.4069	61.3457	65.1232	58.7078	57.2288	50.7847	53.8835	54.7058	48.3412
2021	43.621	46.7814	52.8828	56.068	62.8043	61.7272	53.4749	55.2981	63.3959	55.9495	49.9342	52.2052
2022	49.2845	47.629	47.1953	55.2864	58.2015	63.8546	54.0515	60.2779	57.507	61.9322	60.674	55.0415
