# Supplementary material for: Multifractal analysis of vegetation regulation on ecohydrological processes in a small watershed
Source: PeerJ journal article supplement (doi:10.7717/peerj.20496), 2026-01-12
Supplement: Original_data.zip [file Precipitation data.xlsx]

## Sheet: Sheet2
year	month	day	Precipitation
2017	1	1	0.02
2017	1	2	0
2017	1	3	0
2017	1	4	0.15
2017	1	5	0.92
2017	1	6	1.59
2017	1	7	0.97
2017	1	8	0.16
2017	1	9	1.05
2017	1	10	2.13
2017	1	11	5.97
2017	1	12	5.92
2017	1	13	0.39
2017	1	14	0
2017	1	15	0
2017	1	16	0
2017	1	17	0
2017	1	18	0.03
2017	1	19	0
2017	1	20	0.08
2017	1	21	0
2017	1	22	0
2017	1	23	0
2017	1	24	0.24
2017	1	25	0
2017	1	26	0
2017	1	27	0.5
2017	1	28	0.57
2017	1	29	8.69
2017	1	30	0
2017	1	31	3.3
2017	2	1	1.29
2017	2	2	0.1
2017	2	3	0.02
2017	2	4	0
2017	2	5	0
2017	2	6	0.11
2017	2	7	16.03
2017	2	8	6.23
2017	2	9	0.09
2017	2	10	0.14
2017	2	11	4.62
2017	2	12	0
2017	2	13	0
2017	2	14	0.61
2017	2	15	3.69
2017	2	16	0.03
2017	2	17	0.09
2017	2	18	0.23
2017	2	19	6.68
2017	2	20	0.75
2017	2	21	29.96
2017	2	22	26.29
2017	2	23	23.39
2017	2	24	2.87
2017	2	25	0.41
2017	2	26	0
2017	2	27	0.11
2017	2	28	0
2017	3	1	0
2017	3	2	0
2017	3	3	0.42
2017	3	4	8.2
2017	3	5	13.39
2017	3	6	5.48
2017	3	7	14.43
2017	3	8	3.37
2017	3	9	0.26
2017	3	10	0.33
2017	3	11	0
2017	3	12	3.85
2017	3	13	50.57
2017	3	14	2.08
2017	3	15	1.36
2017	3	16	0.03
2017	3	17	0.21
2017	3	18	0.04
2017	3	19	0.25
2017	3	20	0.53
2017	3	21	9.02
2017	3	22	5.91
2017	3	23	0.03
2017	3	24	21.07
2017	3	25	7.19
2017	3	26	0
2017	3	27	0.59
2017	3	28	0
2017	3	29	1.47
2017	3	30	51.13
2017	3	31	0.1
2017	4	1	0.03
2017	4	2	0
2017	4	3	5.18
2017	4	4	19.74
2017	4	5	43.1
2017	4	6	1.1
2017	4	7	0.04
2017	4	8	46.75
2017	4	9	86.75
2017	4	10	33.34
2017	4	11	3.2
2017	4	12	4.41
2017	4	13	0
2017	4	14	1.38
2017	4	15	0.04
2017	4	16	42.16
2017	4	17	3.17
2017	4	18	0
2017	4	19	0.04
2017	4	20	53.82
2017	4	21	11.68
2017	4	22	0
2017	4	23	0
2017	4	24	17.84
2017	4	25	65.79
2017	4	26	32.9
2017	4	27	25.23
2017	4	28	0.4
2017	4	29	0
2017	4	30	1.16
2017	5	1	0.35
2017	5	2	15.8
2017	5	3	117.86
2017	5	4	0.45
2017	5	5	29.59
2017	5	6	48.09
2017	5	7	19.63
2017	5	8	0.06
2017	5	9	0
2017	5	10	14.37
2017	5	11	154.67
2017	5	12	0.03
2017	5	13	0
2017	5	14	9.89
2017	5	15	3.13
2017	5	16	0.49
2017	5	17	0
2017	5	18	1.82
2017	5	19	0.24
2017	5	20	5.87
2017	5	21	88.83
2017	5	22	86.61
2017	5	23	20.76
2017	5	24	7.56
2017	5	25	0.63
2017	5	26	0
2017	5	27	0
2017	5	28	0
2017	5	29	1.07
2017	5	30	1.93
2017	5	31	0.69
2017	6	1	15.47
2017	6	2	0.15
2017	6	3	9.3
2017	6	4	131.22
2017	6	5	50.94
2017	6	6	0.03
2017	6	7	0
2017	6	8	1.53
2017	6	9	57.47
2017	6	10	24.79
2017	6	11	29.32
2017	6	12	45.29
2017	6	13	12.63
2017	6	14	74.06
2017	6	15	80.25
2017	6	16	4.08
2017	6	17	0.53
2017	6	18	2.69
2017	6	19	5.75
2017	6	20	0.48
2017	6	21	0.02
2017	6	22	6.56
2017	6	23	8.34
2017	6	24	111.01
2017	6	25	7.37
2017	6	26	5.52
2017	6	27	0.61
2017	6	28	0.88
2017	6	29	12.54
2017	6	30	13.68
2017	7	1	2.93
2017	7	2	0.46
2017	7	3	6.99
2017	7	4	9.08
2017	7	5	0.86
2017	7	6	54.11
2017	7	7	71.17
2017	7	8	25.67
2017	7	9	35.55
2017	7	10	0
2017	7	11	0.02
2017	7	12	0.08
2017	7	13	0.05
2017	7	14	49.5
2017	7	15	24.09
2017	7	16	29.41
2017	7	17	21.46
2017	7	18	1.29
2017	7	19	13.88
2017	7	20	2.86
2017	7	21	0.9
2017	7	22	0.09
2017	7	23	0.06
2017	7	24	0.12
2017	7	25	0.86
2017	7	26	0.12
2017	7	27	0
2017	7	28	2.36
2017	7	29	5.6
2017	7	30	6.14
2017	7	31	1.41
2017	8	1	3.29
2017	8	2	0.84
2017	8	3	4.55
2017	8	4	14.08
2017	8	5	9
2017	8	6	0.94
2017	8	7	0.74
2017	8	8	85.39
2017	8	9	0.98
2017	8	10	0
2017	8	11	33.14
2017	8	12	12.76
2017	8	13	3.27
2017	8	14	2.82
2017	8	15	0.81
2017	8	16	3.09
2017	8	17	0.25
2017	8	18	0.01
2017	8	19	0.05
2017	8	20	0.61
2017	8	21	0.03
2017	8	22	0
2017	8	23	1.67
2017	8	24	25
2017	8	25	30.71
2017	8	26	3.92
2017	8	27	0.15
2017	8	28	1.71
2017	8	29	15.65
2017	8	30	9.89
2017	8	31	39.37
2017	9	1	29.85
2017	9	2	141.85
2017	9	3	20.68
2017	9	4	5.44
2017	9	5	14.91
2017	9	6	9.75
2017	9	7	0.12
2017	9	8	0.19
2017	9	9	94.4
2017	9	10	122.75
2017	9	11	0.6
2017	9	12	0
2017	9	13	0
2017	9	14	0.05
2017	9	15	0.16
2017	9	16	0.05
2017	9	17	3.76
2017	9	18	78.95
2017	9	19	94.76
2017	9	20	13.3
2017	9	21	3.08
2017	9	22	1.74
2017	9	23	11.44
2017	9	24	22.34
2017	9	25	3.02
2017	9	26	1.02
2017	9	27	26.37
2017	9	28	42.28
2017	9	29	29.03
2017	9	30	11.25
2017	10	1	3.24
2017	10	2	18.34
2017	10	3	47.73
2017	10	4	131.82
2017	10	5	92.78
2017	10	6	1.13
2017	10	7	0.57
2017	10	8	0.63
2017	10	9	0.39
2017	10	10	6.54
2017	10	11	59.08
2017	10	12	113.85
2017	10	13	52.98
2017	10	14	35.21
2017	10	15	2.03
2017	10	16	1.06
2017	10	17	21.91
2017	10	18	19.46
2017	10	19	0.85
2017	10	20	0.06
2017	10	21	5.72
2017	10	22	32.63
2017	10	23	7.1
2017	10	24	0.33
2017	10	25	2.46
2017	10	26	2.53
2017	10	27	0.02
2017	10	28	0
2017	10	29	1.44
2017	10	30	0.7
2017	10	31	0
2017	11	1	0.02
2017	11	2	0
2017	11	3	0
2017	11	4	0
2017	11	5	0
2017	11	6	0
2017	11	7	0
2017	11	8	0
2017	11	9	0
2017	11	10	19.4
2017	11	11	25.62
2017	11	12	0.05
2017	11	13	1.35
2017	11	14	0.29
2017	11	15	0
2017	11	16	0.43
2017	11	17	6.65
2017	11	18	6.54
2017	11	19	3.74
2017	11	20	1.63
2017	11	21	0.47
2017	11	22	0.45
2017	11	23	4.3
2017	11	24	0.05
2017	11	25	0
2017	11	26	0
2017	11	27	0.27
2017	11	28	1.53
2017	11	29	16.78
2017	11	30	4.79
2017	12	1	1.12
2017	12	2	0.08
2017	12	3	0.04
2017	12	4	0.06
2017	12	5	0.08
2017	12	6	0.04
2017	12	7	0.85
2017	12	8	2.03
2017	12	9	0
2017	12	10	0
2017	12	11	0
2017	12	12	0
2017	12	13	0.19
2017	12	14	0.03
2017	12	15	1
2017	12	16	5.29
2017	12	17	0.17
2017	12	18	0
2017	12	19	0
2017	12	20	0
2017	12	21	0
2017	12	22	0
2017	12	23	0
2017	12	24	0
2017	12	25	0
2017	12	26	0
2017	12	27	0
2017	12	28	0
2017	12	29	6.27
2017	12	30	9.78
2017	12	31	0
2018	1	1	0
2018	1	2	0.25
2018	1	3	15.97
2018	1	4	19.54
2018	1	5	0.65
2018	1	6	1.07
2018	1	7	5.89
2018	1	8	4.02
2018	1	9	0
2018	1	10	0
2018	1	11	0
2018	1	12	0
2018	1	13	0
2018	1	14	0
2018	1	15	0
2018	1	16	7.59
2018	1	17	0.02
2018	1	18	5.7
2018	1	19	3.53
2018	1	20	0.34
2018	1	21	9.94
2018	1	22	0.03
2018	1	23	0.06
2018	1	24	5.88
2018	1	25	4.58
2018	1	26	1.41
2018	1	27	0.3
2018	1	28	0.38
2018	1	29	0.15
2018	1	30	0
2018	1	31	0.41
2018	2	1	0
2018	2	2	0.03
2018	2	3	0
2018	2	4	1.46
2018	2	5	0.02
2018	2	6	0
2018	2	7	0
2018	2	8	0
2018	2	9	0.07
2018	2	10	12.9
2018	2	11	2.64
2018	2	12	0.07
2018	2	13	0
2018	2	14	0
2018	2	15	0.19
2018	2	16	0
2018	2	17	0
2018	2	18	4.91
2018	2	19	9.34
2018	2	20	3.78
2018	2	21	0.89
2018	2	22	14.82
2018	2	23	0
2018	2	24	0.16
2018	2	25	0.09
2018	2	26	0
2018	2	27	2.83
2018	2	28	0.35
2018	3	1	2.48
2018	3	2	1.97
2018	3	3	0
2018	3	4	6.1
2018	3	5	5.37
2018	3	6	17.81
2018	3	7	11.7
2018	3	8	0
2018	3	9	0
2018	3	10	0.66
2018	3	11	0.54
2018	3	12	1
2018	3	13	18.13
2018	3	14	1.57
2018	3	15	0.01
2018	3	16	0.29
2018	3	17	12.8
2018	3	18	18.88
2018	3	19	44.36
2018	3	20	0.17
2018	3	21	1.2
2018	3	22	0
2018	3	23	1.33
2018	3	24	22.65
2018	3	25	8.57
2018	3	26	0
2018	3	27	0.45
2018	3	28	15.75
2018	3	29	5.45
2018	3	30	0.95
2018	3	31	16.8
2018	4	1	10.64
2018	4	2	0.4
2018	4	3	0
2018	4	4	0.09
2018	4	5	134.17
2018	4	6	4.83
2018	4	7	0
2018	4	8	0
2018	4	9	0
2018	4	10	0
2018	4	11	2.84
2018	4	12	3.24
2018	4	13	86.46
2018	4	14	56.4
2018	4	15	1.34
2018	4	16	0
2018	4	17	0
2018	4	18	0
2018	4	19	0.01
2018	4	20	32.7
2018	4	21	3.16
2018	4	22	79.29
2018	4	23	25
2018	4	24	64.78
2018	4	25	42.13
2018	4	26	11.03
2018	4	27	0.11
2018	4	28	0.54
2018	4	29	2.41
2018	4	30	15.94
2018	5	1	16.59
2018	5	2	17.39
2018	5	3	0.71
2018	5	4	3.78
2018	5	5	54.96
2018	5	6	76.62
2018	5	7	0.13
2018	5	8	1.61
2018	5	9	15.47
2018	5	10	4.76
2018	5	11	22.58
2018	5	12	3.56
2018	5	13	0
2018	5	14	0.23
2018	5	15	1.73
2018	5	16	0
2018	5	17	58.66
2018	5	18	9.7
2018	5	19	16.35
2018	5	20	27.72
2018	5	21	15.72
2018	5	22	155.77
2018	5	23	1.52
2018	5	24	2.32
2018	5	25	9.88
2018	5	26	26.56
2018	5	27	17.14
2018	5	28	0
2018	5	29	0.42
2018	5	30	24.09
2018	5	31	14.13
2018	6	1	1
2018	6	2	0.09
2018	6	3	1.33
2018	6	4	27.65
2018	6	5	0
2018	6	6	0
2018	6	7	0.17
2018	6	8	4.42
2018	6	9	0.06
2018	6	10	0
2018	6	11	26.27
2018	6	12	10.9
2018	6	13	1.19
2018	6	14	0.21
2018	6	15	13.08
2018	6	16	2.79
2018	6	17	11.16
2018	6	18	54.11
2018	6	19	32.59
2018	6	20	35.03
2018	6	21	34
2018	6	22	13.84
2018	6	23	6.24
2018	6	24	14.51
2018	6	25	0.84
2018	6	26	0.05
2018	6	27	0.02
2018	6	28	4.17
2018	6	29	2.6
2018	6	30	26.39
2018	7	1	10.38
2018	7	2	0.58
2018	7	3	70.73
2018	7	4	61.44
2018	7	5	24.67
2018	7	6	55.56
2018	7	7	5.48
2018	7	8	2.29
2018	7	9	9.08
2018	7	10	5.16
2018	7	11	0.07
2018	7	12	3.59
2018	7	13	13.51
2018	7	14	4.19
2018	7	15	0.26
2018	7	16	0.18
2018	7	17	0.17
2018	7	18	0
2018	7	19	0.36
2018	7	20	0
2018	7	21	0.68
2018	7	22	2.03
2018	7	23	1.32
2018	7	24	0.61
2018	7	25	6.78
2018	7	26	21.46
2018	7	27	6.08
2018	7	28	3.45
2018	7	29	4.02
2018	7	30	66.77
2018	7	31	14.78
2018	8	1	25.39
2018	8	2	6.22
2018	8	3	3.11
2018	8	4	4.57
2018	8	5	11.23
2018	8	6	16.57
2018	8	7	14.88
2018	8	8	17.44
2018	8	9	8.54
2018	8	10	5.62
2018	8	11	5.29
2018	8	12	0.85
2018	8	13	0.64
2018	8	14	4.25
2018	8	15	11.46
2018	8	16	1.64
2018	8	17	9.41
2018	8	18	3.25
2018	8	19	0.87
2018	8	20	1.4
2018	8	21	4.37
2018	8	22	58.51
2018	8	23	138.65
2018	8	24	0
2018	8	25	0
2018	8	26	0
2018	8	27	0.19
2018	8	28	5.02
2018	8	29	3.12
2018	8	30	8.76
2018	8	31	3.73
2018	9	1	1.3
2018	9	2	0.28
2018	9	3	3.98
2018	9	4	5.74
2018	9	5	1.1
2018	9	6	43.95
2018	9	7	24.93
2018	9	8	1.2
2018	9	9	2.73
2018	9	10	14.09
2018	9	11	11.94
2018	9	12	32.13
2018	9	13	0.89
2018	9	14	5.35
2018	9	15	2.58
2018	9	16	4.48
2018	9	17	9.73
2018	9	18	18.33
2018	9	19	1.97
2018	9	20	85.09
2018	9	21	26.9
2018	9	22	13.51
2018	9	23	0.86
2018	9	24	59.71
2018	9	25	87.91
2018	9	26	8.91
2018	9	27	9.07
2018	9	28	5.39
2018	9	29	0.03
2018	9	30	0.26
2018	10	1	15.55
2018	10	2	7.04
2018	10	3	10.83
2018	10	4	0.28
2018	10	5	0.03
2018	10	6	11.32
2018	10	7	25.32
2018	10	8	19.05
2018	10	9	8.64
2018	10	10	0
2018	10	11	0.03
2018	10	12	0
2018	10	13	10.01
2018	10	14	2.95
2018	10	15	3.35
2018	10	16	1.43
2018	10	17	0
2018	10	18	4.29
2018	10	19	30.56
2018	10	20	13.19
2018	10	21	2.87
2018	10	22	0.12
2018	10	23	4.03
2018	10	24	0.13
2018	10	25	6.56
2018	10	26	0.26
2018	10	27	0.1
2018	10	28	0.13
2018	10	29	0
2018	10	30	0
2018	10	31	0
2018	11	1	0
2018	11	2	0
2018	11	3	0
2018	11	4	0.88
2018	11	5	42.77
2018	11	6	46.93
2018	11	7	50.62
2018	11	8	0.88
2018	11	9	0
2018	11	10	4.02
2018	11	11	11.95
2018	11	12	3.34
2018	11	13	0.37
2018	11	14	1.34
2018	11	15	0.93
2018	11	16	7.22
2018	11	17	16.88
2018	11	18	24.15
2018	11	19	0.23
2018	11	20	0.13
2018	11	21	3.95
2018	11	22	0.58
2018	11	23	0
2018	11	24	1.22
2018	11	25	0.2
2018	11	26	0
2018	11	27	2.89
2018	11	28	0.11
2018	11	29	0.05
2018	11	30	3.46
2018	12	1	1.03
2018	12	2	1.07
2018	12	3	9.35
2018	12	4	5.48
2018	12	5	0.93
2018	12	6	4.29
2018	12	7	5.12
2018	12	8	1.11
2018	12	9	0.35
2018	12	10	0.03
2018	12	11	0.03
2018	12	12	0.02
2018	12	13	0
2018	12	14	0
2018	12	15	0.04
2018	12	16	0
2018	12	17	0
2018	12	18	0
2018	12	19	3.24
2018	12	20	0
2018	12	21	4.22
2018	12	22	6.2
2018	12	23	4.96
2018	12	24	0.9
2018	12	25	3.07
2018	12	26	1.68
2018	12	27	1.38
2018	12	28	2.04
2018	12	29	5.48
2018	12	30	2.51
2018	12	31	0.06
2019	1	1	0
2019	1	2	0
2019	1	3	0.06
2019	1	4	1.58
2019	1	5	1.21
2019	1	6	0.03
2019	1	7	0.1
2019	1	8	0.48
2019	1	9	6.99
2019	1	10	1.09
2019	1	11	0.82
2019	1	12	0.13
2019	1	13	0
2019	1	14	3.12
2019	1	15	6.98
2019	1	16	0.86
2019	1	17	0
2019	1	18	0.03
2019	1	19	0.29
2019	1	20	3.73
2019	1	21	0.75
2019	1	22	0
2019	1	23	0
2019	1	24	0
2019	1	25	0
2019	1	26	0.71
2019	1	27	0.03
2019	1	28	0.25
2019	1	29	0.59
2019	1	30	14.11
2019	1	31	3.46
2019	2	1	0.6
2019	2	2	0.19
2019	2	3	0.53
2019	2	4	0.14
2019	2	5	0
2019	2	6	0
2019	2	7	0.1
2019	2	8	0.06
2019	2	9	0.51
2019	2	10	1.23
2019	2	11	0.24
2019	2	12	0.09
2019	2	13	0.03
2019	2	14	0.06
2019	2	15	0.05
2019	2	16	0.11
2019	2	17	0.19
2019	2	18	0.21
2019	2	19	0
2019	2	20	0.19
2019	2	21	1.29
2019	2	22	0
2019	2	23	2.42
2019	2	24	1.17
2019	2	25	0.17
2019	2	26	0.13
2019	2	27	1.32
2019	2	28	0
2019	3	1	0.88
2019	3	2	4.76
2019	3	3	0
2019	3	4	1.03
2019	3	5	9.05
2019	3	6	1.64
2019	3	7	4.05
2019	3	8	2.59
2019	3	9	0.4
2019	3	10	0
2019	3	11	0
2019	3	12	0.04
2019	3	13	2.94
2019	3	14	1.68
2019	3	15	1.68
2019	3	16	3.45
2019	3	17	4.91
2019	3	18	0
2019	3	19	0.06
2019	3	20	3.2
2019	3	21	42.3
2019	3	22	29.51
2019	3	23	23.91
2019	3	24	10.66
2019	3	25	0
2019	3	26	0.07
2019	3	27	0
2019	3	28	0.85
2019	3	29	0
2019	3	30	32.18
2019	3	31	13.06
2019	4	1	1.65
2019	4	2	0.66
2019	4	3	5.67
2019	4	4	4.05
2019	4	5	0.01
2019	4	6	0
2019	4	7	0
2019	4	8	0
2019	4	9	26.6
2019	4	10	10.56
2019	4	11	5.4
2019	4	12	0
2019	4	13	0.09
2019	4	14	72.33
2019	4	15	13.38
2019	4	16	0.1
2019	4	17	0
2019	4	18	0
2019	4	19	12.83
2019	4	20	80.06
2019	4	21	15.29
2019	4	22	2.65
2019	4	23	0
2019	4	24	0.18
2019	4	25	0.66
2019	4	26	0
2019	4	27	0.09
2019	4	28	16.39
2019	4	29	17.86
2019	4	30	0.82
2019	5	1	0.26
2019	5	2	8.41
2019	5	3	4.96
2019	5	4	1.82
2019	5	5	25.42
2019	5	6	22.52
2019	5	7	34.48
2019	5	8	1.75
2019	5	9	2.94
2019	5	10	0
2019	5	11	0.03
2019	5	12	77.06
2019	5	13	31.11
2019	5	14	9.07
2019	5	15	5.73
2019	5	16	2.29
2019	5	17	0.03
2019	5	18	49.2
2019	5	19	20.46
2019	5	20	47.13
2019	5	21	0.86
2019	5	22	0
2019	5	23	0
2019	5	24	3.95
2019	5	25	26.47
2019	5	26	0.18
2019	5	27	10.39
2019	5	28	22.25
2019	5	29	7.48
2019	5	30	12.42
2019	5	31	0.04
2019	6	1	0.73
2019	6	2	0
2019	6	3	0
2019	6	4	0
2019	6	5	129.2
2019	6	6	0.03
2019	6	7	0.85
2019	6	8	29.25
2019	6	9	54.39
2019	6	10	10.9
2019	6	11	78.61
2019	6	12	18.96
2019	6	13	0.11
2019	6	14	2.19
2019	6	15	96.79
2019	6	16	9.44
2019	6	17	32.24
2019	6	18	3.46
2019	6	19	2.72
2019	6	20	10.52
2019	6	21	50.83
2019	6	22	80.37
2019	6	23	4.16
2019	6	24	0.84
2019	6	25	15.43
2019	6	26	0.67
2019	6	27	13.58
2019	6	28	87.52
2019	6	29	3
2019	6	30	0.13
2019	7	1	0
2019	7	2	0.4
2019	7	3	3.52
2019	7	4	32.56
2019	7	5	1.03
2019	7	6	0.22
2019	7	7	2.43
2019	7	8	67.74
2019	7	9	1.12
2019	7	10	0.46
2019	7	11	3.66
2019	7	12	21.09
2019	7	13	6.64
2019	7	14	1.44
2019	7	15	5.77
2019	7	16	27.66
2019	7	17	24.01
2019	7	18	50.65
2019	7	19	58.41
2019	7	20	5.88
2019	7	21	2.82
2019	7	22	35.28
2019	7	23	96.26
2019	7	24	38.44
2019	7	25	20.04
2019	7	26	3.39
2019	7	27	0.21
2019	7	28	0.16
2019	7	29	7.33
2019	7	30	19.33
2019	7	31	52.77
2019	8	1	0.74
2019	8	2	2.37
2019	8	3	13.64
2019	8	4	16.25
2019	8	5	2.61
2019	8	6	53.16
2019	8	7	104.18
2019	8	8	8.55
2019	8	9	11.61
2019	8	10	1.54
2019	8	11	0.44
2019	8	12	0.15
2019	8	13	0
2019	8	14	0
2019	8	15	0.03
2019	8	16	0
2019	8	17	0
2019	8	18	0
2019	8	19	0.07
2019	8	20	0
2019	8	21	0.51
2019	8	22	0.13
2019	8	23	0.02
2019	8	24	1.67
2019	8	25	5.69
2019	8	26	0.04
2019	8	27	16.1
2019	8	28	92.24
2019	8	29	29.48
2019	8	30	0.44
2019	8	31	26.07
2019	9	1	1.58
2019	9	2	0.03
2019	9	3	0.32
2019	9	4	5.17
2019	9	5	2.48
2019	9	6	1.78
2019	9	7	3.67
2019	9	8	82.67
2019	9	9	17.19
2019	9	10	10.3
2019	9	11	4.73
2019	9	12	0
2019	9	13	0.26
2019	9	14	6.3
2019	9	15	11.92
2019	9	16	12.77
2019	9	17	14.71
2019	9	18	23.84
2019	9	19	4.72
2019	9	20	25.86
2019	9	21	0.22
2019	9	22	0
2019	9	23	0.02
2019	9	24	0.68
2019	9	25	1.22
2019	9	26	0.03
2019	9	27	0.15
2019	9	28	0.01
2019	9	29	0
2019	9	30	0.03
2019	10	1	1.47
2019	10	2	0.6
2019	10	3	6.57
2019	10	4	55.38
2019	10	5	38.78
2019	10	6	6.72
2019	10	7	71.41
2019	10	8	18.55
2019	10	9	2.23
2019	10	10	8.31
2019	10	11	39.05
2019	10	12	3.58
2019	10	13	4.85
2019	10	14	30.62
2019	10	15	24.5
2019	10	16	23.07
2019	10	17	2.87
2019	10	18	0
2019	10	19	0
2019	10	20	12.79
2019	10	21	35.88
2019	10	22	73.24
2019	10	23	0.91
2019	10	24	1.64
2019	10	25	35.85
2019	10	26	34.72
2019	10	27	21.66
2019	10	28	0.08
2019	10	29	0.03
2019	10	30	0.21
2019	10	31	0.63
2019	11	1	1.48
2019	11	2	7.62
2019	11	3	0
2019	11	4	0.54
2019	11	5	7.26
2019	11	6	11.06
2019	11	7	0.03
2019	11	8	0
2019	11	9	0
2019	11	10	0.03
2019	11	11	0
2019	11	12	2.68
2019	11	13	9.32
2019	11	14	0
2019	11	15	0
2019	11	16	0
2019	11	17	11.91
2019	11	18	29.37
2019	11	19	0.22
2019	11	20	0.04
2019	11	21	0.03
2019	11	22	0
2019	11	23	0.31
2019	11	24	54.99
2019	11	25	33.02
2019	11	26	3.47
2019	11	27	2.93
2019	11	28	0.73
2019	11	29	0.21
2019	11	30	0.85
2019	12	1	1.49
2019	12	2	0
2019	12	3	0
2019	12	4	0.05
2019	12	5	1.35
2019	12	6	0
2019	12	7	0
2019	12	8	0
2019	12	9	0
2019	12	10	0
2019	12	11	0.14
2019	12	12	1.16
2019	12	13	0.01
2019	12	14	0.41
2019	12	15	0.24
2019	12	16	0.62
2019	12	17	2.15
2019	12	18	31.22
2019	12	19	8.22
2019	12	20	2.92
2019	12	21	3.75
2019	12	22	0.03
2019	12	23	0.01
2019	12	24	0
2019	12	25	0.12
2019	12	26	2.73
2019	12	27	0.18
2019	12	28	4.08
2019	12	29	0.01
2019	12	30	0
2019	12	31	0.1
2020	1	1	0.03
2020	1	2	0.06
2020	1	3	0.4
2020	1	4	0.33
2020	1	5	4.65
2020	1	6	36.46
2020	1	7	3.91
2020	1	8	17.78
2020	1	9	2.78
2020	1	10	0.33
2020	1	11	0.08
2020	1	12	0
2020	1	13	0
2020	1	14	0.06
2020	1	15	1.04
2020	1	16	0.03
2020	1	17	0
2020	1	18	0.09
2020	1	19	0.03
2020	1	20	0
2020	1	21	0.11
2020	1	22	2.3
2020	1	23	1.88
2020	1	24	6.56
2020	1	25	5.34
2020	1	26	3.23
2020	1	27	0.06
2020	1	28	0.16
2020	1	29	0.01
2020	1	30	0
2020	1	31	2.49
2020	2	1	2.05
2020	2	2	9.39
2020	2	3	4.9
2020	2	4	0.04
2020	2	5	4.74
2020	2	6	11.15
2020	2	7	2.27
2020	2	8	0.06
2020	2	9	0.46
2020	2	10	1.05
2020	2	11	0.1
2020	2	12	0
2020	2	13	0
2020	2	14	0.37
2020	2	15	41.91
2020	2	16	0.4
2020	2	17	0
2020	2	18	0
2020	2	19	0.73
2020	2	20	0.25
2020	2	21	2.85
2020	2	22	0
2020	2	23	0.14
2020	2	24	1.45
2020	2	25	0.35
2020	2	26	0.68
2020	2	27	9.87
2020	2	28	13.49
2020	2	29	0.31
2020	3	1	0.44
2020	3	2	34.15
2020	3	3	8.49
2020	3	4	1.93
2020	3	5	0
2020	3	6	0
2020	3	7	0
2020	3	8	0.7
2020	3	9	11.78
2020	3	10	0.63
2020	3	11	5.66
2020	3	12	0.25
2020	3	13	3.47
2020	3	14	0.36
2020	3	15	0
2020	3	16	0.79
2020	3	17	0.74
2020	3	18	0
2020	3	19	0
2020	3	20	0
2020	3	21	0.6
2020	3	22	0.7
2020	3	23	0.18
2020	3	24	1.2
2020	3	25	8.79
2020	3	26	0.33
2020	3	27	156.22
2020	3	28	7.35
2020	3	29	10.1
2020	3	30	1.42
2020	3	31	0.79
2020	4	1	0.21
2020	4	2	0.07
2020	4	3	0.33
2020	4	4	2.1
2020	4	5	4.17
2020	4	6	0.16
2020	4	7	0
2020	4	8	1.33
2020	4	9	0
2020	4	10	38.71
2020	4	11	14.22
2020	4	12	0
2020	4	13	1.75
2020	4	14	0.03
2020	4	15	0
2020	4	16	0
2020	4	17	44.77
2020	4	18	43.69
2020	4	19	0.72
2020	4	20	46.54
2020	4	21	18.92
2020	4	22	21.14
2020	4	23	10.55
2020	4	24	0.52
2020	4	25	0
2020	4	26	0
2020	4	27	0
2020	4	28	0
2020	4	29	0
2020	4	30	13.62
2020	5	1	0.02
2020	5	2	0
2020	5	3	0
2020	5	4	27.59
2020	5	5	1.1
2020	5	6	22.26
2020	5	7	1.97
2020	5	8	19.95
2020	5	9	30.54
2020	5	10	0.37
2020	5	11	13.66
2020	5	12	0.11
2020	5	13	18.12
2020	5	14	46.85
2020	5	15	0.11
2020	5	16	4.26
2020	5	17	3
2020	5	18	0.03
2020	5	19	0
2020	5	20	56.66
2020	5	21	22.4
2020	5	22	0.31
2020	5	23	0.01
2020	5	24	29.1
2020	5	25	28.25
2020	5	26	0.04
2020	5	27	10.97
2020	5	28	10.18
2020	5	29	2.65
2020	5	30	0
2020	5	31	29
2020	6	1	0.08
2020	6	2	123.73
2020	6	3	0.61
2020	6	4	1.2
2020	6	5	0
2020	6	6	0.36
2020	6	7	3.98
2020	6	8	54.8
2020	6	9	12.54
2020	6	10	3.59
2020	6	11	43.74
2020	6	12	39.57
2020	6	13	11.4
2020	6	14	56.25
2020	6	15	1.3
2020	6	16	9.09
2020	6	17	112.76
2020	6	18	12.33
2020	6	19	1.32
2020	6	20	50.6
2020	6	21	35.18
2020	6	22	71.06
2020	6	23	12.29
2020	6	24	0.11
2020	6	25	0
2020	6	26	0.35
2020	6	27	156.65
2020	6	28	21.27
2020	6	29	1.06
2020	6	30	8.54
2020	7	1	48.1
2020	7	2	113.35
2020	7	3	1.73
2020	7	4	46.9
2020	7	5	39.12
2020	7	6	10.54
2020	7	7	23.74
2020	7	8	6.4
2020	7	9	7.54
2020	7	10	19.88
2020	7	11	37.73
2020	7	12	57.76
2020	7	13	44.07
2020	7	14	3.13
2020	7	15	49.15
2020	7	16	146
2020	7	17	143.31
2020	7	18	35.37
2020	7	19	4
2020	7	20	2.38
2020	7	21	15.55
2020	7	22	8.86
2020	7	23	1.39
2020	7	24	2.58
2020	7	25	33.2
2020	7	26	147.11
2020	7	27	0.21
2020	7	28	0.31
2020	7	29	0.32
2020	7	30	4.01
2020	7	31	15.73
2020	8	1	3.15
2020	8	2	1.49
2020	8	3	0.27
2020	8	4	0.12
2020	8	5	0.05
2020	8	6	0.15
2020	8	7	1.18
2020	8	8	9.64
2020	8	9	48.76
2020	8	10	1.64
2020	8	11	2.08
2020	8	12	1.75
2020	8	13	17.29
2020	8	14	1.66
2020	8	15	0.23
2020	8	16	0.03
2020	8	17	4.12
2020	8	18	21.09
2020	8	19	7.55
2020	8	20	11.13
2020	8	21	6.67
2020	8	22	1.55
2020	8	23	0.23
2020	8	24	24.66
2020	8	25	1.14
2020	8	26	0
2020	8	27	0
2020	8	28	0
2020	8	29	0.11
2020	8	30	0.2
2020	8	31	4.23
2020	9	1	0.31
2020	9	2	33.26
2020	9	3	7.31
2020	9	4	6.12
2020	9	5	1.92
2020	9	6	27.65
2020	9	7	0.06
2020	9	8	0
2020	9	9	1.51
2020	9	10	10.7
2020	9	11	4.4
2020	9	12	20.79
2020	9	13	52.63
2020	9	14	31.35
2020	9	15	9.46
2020	9	16	43.63
2020	9	17	26.57
2020	9	18	0.11
2020	9	19	0
2020	9	20	1.51
2020	9	21	7.53
2020	9	22	76.19
2020	9	23	4.83
2020	9	24	0.03
2020	9	25	40.4
2020	9	26	23.2
2020	9	27	6.33
2020	9	28	3.68
2020	9	29	9.4
2020	9	30	0.36
2020	10	1	1.58
2020	10	2	26.26
2020	10	3	89.06
2020	10	4	78.47
2020	10	5	35.22
2020	10	6	12.22
2020	10	7	4.44
2020	10	8	0.29
2020	10	9	2.36
2020	10	10	0
2020	10	11	0.21
2020	10	12	11.33
2020	10	13	2.42
2020	10	14	8.32
2020	10	15	67.9
2020	10	16	38.52
2020	10	17	14.93
2020	10	18	4.92
2020	10	19	1.55
2020	10	20	16.38
2020	10	21	1.19
2020	10	22	0.03
2020	10	23	0
2020	10	24	0
2020	10	25	0
2020	10	26	0.2
2020	10	27	3.18
2020	10	28	11.12
2020	10	29	1.75
2020	10	30	1.19
2020	10	31	6.28
2020	11	1	39.92
2020	11	2	6.16
2020	11	3	2.07
2020	11	4	0.03
2020	11	5	0.06
2020	11	6	0.38
2020	11	7	0
2020	11	8	0
2020	11	9	0
2020	11	10	0
2020	11	11	0
2020	11	12	0
2020	11	13	0
2020	11	14	0
2020	11	15	0
2020	11	16	0.01
2020	11	17	0.84
2020	11	18	8.77
2020	11	19	2.71
2020	11	20	4.31
2020	11	21	5.39
2020	11	22	11.77
2020	11	23	15.19
2020	11	24	5.8
2020	11	25	2.4
2020	11	26	2.1
2020	11	27	5.87
2020	11	28	5.88
2020	11	29	0.65
2020	11	30	0.08
2020	12	1	0.48
2020	12	2	0.24
2020	12	3	5.01
2020	12	4	0.16
2020	12	5	0
2020	12	6	0.6
2020	12	7	6.13
2020	12	8	2.11
2020	12	9	0.04
2020	12	10	0.05
2020	12	11	0.29
2020	12	12	0.2
2020	12	13	8.18
2020	12	14	2.68
2020	12	15	0.63
2020	12	16	0.24
2020	12	17	0.02
2020	12	18	0
2020	12	19	0.05
2020	12	20	0
2020	12	21	0
2020	12	22	0
2020	12	23	0
2020	12	24	0
2020	12	25	0.05
2020	12	26	0.06
2020	12	27	0.02
2020	12	28	0.58
2020	12	29	23.17
2020	12	30	2.52
2020	12	31	0.6
2021	1	1	0
2021	1	2	0
2021	1	3	1.45
2021	1	4	0
2021	1	5	1.05
2021	1	6	0.31
2021	1	7	5.98
2021	1	8	0.28
2021	1	9	0.03
2021	1	10	0.71
2021	1	11	0.33
2021	1	12	0
2021	1	13	0
2021	1	14	0
2021	1	15	0
2021	1	16	5.08
2021	1	17	9.81
2021	1	18	0
2021	1	19	0.05
2021	1	20	0.4
2021	1	21	10.35
2021	1	22	0.46
2021	1	23	0
2021	1	24	2.37
2021	1	25	20.13
2021	1	26	1.91
2021	1	27	0.81
2021	1	28	0.03
2021	1	29	0
2021	1	30	0
2021	1	31	1.28
2021	2	1	0.91
2021	2	2	0.05
2021	2	3	0
2021	2	4	4.3
2021	2	5	0.76
2021	2	6	0.16
2021	2	7	0.37
2021	2	8	0.43
2021	2	9	0.06
2021	2	10	0.34
2021	2	11	0
2021	2	12	0
2021	2	13	0.55
2021	2	14	0.16
2021	2	15	28.43
2021	2	16	8.52
2021	2	17	0.1
2021	2	18	0.13
2021	2	19	0
2021	2	20	0
2021	2	21	0
2021	2	22	0
2021	2	23	3.06
2021	2	24	0.07
2021	2	25	28.01
2021	2	26	12.35
2021	2	27	0.05
2021	2	28	1.79
2021	3	1	13.65
2021	3	2	0.3
2021	3	3	1.43
2021	3	4	0
2021	3	5	0.58
2021	3	6	2.58
2021	3	7	1.75
2021	3	8	13.29
2021	3	9	0
2021	3	10	3.98
2021	3	11	0.12
2021	3	12	0
2021	3	13	0
2021	3	14	0
2021	3	15	10.35
2021	3	16	10.66
2021	3	17	5.67
2021	3	18	17.16
2021	3	19	2.79
2021	3	20	19.88
2021	3	21	32.22
2021	3	22	0.97
2021	3	23	0.15
2021	3	24	0
2021	3	25	0
2021	3	26	5.24
2021	3	27	0.48
2021	3	28	0
2021	3	29	0
2021	3	30	105.79
2021	3	31	0.16
2021	4	1	30.95
2021	4	2	16.06
2021	4	3	13.95
2021	4	4	1.22
2021	4	5	0.8
2021	4	6	16.37
2021	4	7	65.72
2021	4	8	0.38
2021	4	9	0.03
2021	4	10	6.03
2021	4	11	1.56
2021	4	12	3.07
2021	4	13	5.6
2021	4	14	6.45
2021	4	15	0.37
2021	4	16	38.54
2021	4	17	0.92
2021	4	18	5.25
2021	4	19	0.21
2021	4	20	24.39
2021	4	21	5.56
2021	4	22	0.11
2021	4	23	6.66
2021	4	24	75.56
2021	4	25	4.66
2021	4	26	10.92
2021	4	27	0.17
2021	4	28	4.59
2021	4	29	0
2021	4	30	0
2021	5	1	0
2021	5	2	0.65
2021	5	3	74.59
2021	5	4	1.23
2021	5	5	49.26
2021	5	6	34.81
2021	5	7	1.17
2021	5	8	0.03
2021	5	9	0
2021	5	10	15.5
2021	5	11	36.29
2021	5	12	1.35
2021	5	13	22.87
2021	5	14	29.89
2021	5	15	118.29
2021	5	16	15.09
2021	5	17	2.06
2021	5	18	3.53
2021	5	19	5.24
2021	5	20	0.11
2021	5	21	0.13
2021	5	22	4.64
2021	5	23	14.14
2021	5	24	1.78
2021	5	25	14.01
2021	5	26	46.77
2021	5	27	0.04
2021	5	28	3.22
2021	5	29	5.49
2021	5	30	0.06
2021	5	31	0.02
2021	6	1	0.16
2021	6	2	1.12
2021	6	3	49.11
2021	6	4	0.1
2021	6	5	0
2021	6	6	0
2021	6	7	0
2021	6	8	0.04
2021	6	9	50.61
2021	6	10	6.05
2021	6	11	4.14
2021	6	12	7
2021	6	13	8.73
2021	6	14	1.47
2021	6	15	0.63
2021	6	16	0.87
2021	6	17	36.89
2021	6	18	69.62
2021	6	19	53.2
2021	6	20	7.9
2021	6	21	0.42
2021	6	22	0.03
2021	6	23	0
2021	6	24	0.76
2021	6	25	20.51
2021	6	26	45.43
2021	6	27	68.37
2021	6	28	38.98
2021	6	29	24.71
2021	6	30	9.93
2021	7	1	17.45
2021	7	2	49.36
2021	7	3	20.35
2021	7	4	7.87
2021	7	5	58.69
2021	7	6	12.39
2021	7	7	19.19
2021	7	8	67.05
2021	7	9	15.01
2021	7	10	27.39
2021	7	11	60.76
2021	7	12	57.81
2021	7	13	0.22
2021	7	14	0.06
2021	7	15	4.4
2021	7	16	78.32
2021	7	17	58.15
2021	7	18	13.92
2021	7	19	30.83
2021	7	20	3.74
2021	7	21	5.95
2021	7	22	1.57
2021	7	23	4.33
2021	7	24	6.88
2021	7	25	3.54
2021	7	26	3.07
2021	7	27	38.23
2021	7	28	6.44
2021	7	29	0.91
2021	7	30	1.22
2021	7	31	0.04
2021	8	1	0.03
2021	8	2	0.17
2021	8	3	4.6
2021	8	4	0.18
2021	8	5	16.33
2021	8	6	10.23
2021	8	7	23.51
2021	8	8	176.03
2021	8	9	60.83
2021	8	10	62.72
2021	8	11	21.82
2021	8	12	12.83
2021	8	13	112.16
2021	8	14	7.83
2021	8	15	0.48
2021	8	16	0.1
2021	8	17	1.72
2021	8	18	14.85
2021	8	19	0.85
2021	8	20	1.66
2021	8	21	9.67
2021	8	22	15.34
2021	8	23	231.59
2021	8	24	5.63
2021	8	25	29.06
2021	8	26	144.4
2021	8	27	82.88
2021	8	28	53.12
2021	8	29	100.4
2021	8	30	12.41
2021	8	31	1.84
2021	9	1	9.1
2021	9	2	13.99
2021	9	3	0.67
2021	9	4	22.87
2021	9	5	14.75
2021	9	6	111.7
2021	9	7	19.17
2021	9	8	0.11
2021	9	9	3.25
2021	9	10	0
2021	9	11	33.58
2021	9	12	31.07
2021	9	13	0.06
2021	9	14	1.23
2021	9	15	2.98
2021	9	16	53.92
2021	9	17	57.91
2021	9	18	20.96
2021	9	19	112.7
2021	9	20	0.51
2021	9	21	0.03
2021	9	22	0.03
2021	9	23	2.55
2021	9	24	0.94
2021	9	25	0.01
2021	9	26	0.12
2021	9	27	10.32
2021	9	28	17.36
2021	9	29	4.1
2021	9	30	0
2021	10	1	0
2021	10	2	0
2021	10	3	0
2021	10	4	0.22
2021	10	5	2.54
2021	10	6	4.97
2021	10	7	81.49
2021	10	8	8.37
2021	10	9	0.16
2021	10	10	50.59
2021	10	11	19.74
2021	10	12	1.26
2021	10	13	1.33
2021	10	14	8.06
2021	10	15	73.64
2021	10	16	52.07
2021	10	17	25.99
2021	10	18	0.39
2021	10	19	3.39
2021	10	20	15.92
2021	10	21	2.65
2021	10	22	3.97
2021	10	23	0.01
2021	10	24	0
2021	10	25	0.03
2021	10	26	8.63
2021	10	27	0.58
2021	10	28	0.78
2021	10	29	5.62
2021	10	30	0.03
2021	10	31	5.16
2021	11	1	21.64
2021	11	2	2.12
2021	11	3	2.16
2021	11	4	0.93
2021	11	5	0.07
2021	11	6	16.34
2021	11	7	30.84
2021	11	8	0
2021	11	9	0
2021	11	10	0
2021	11	11	1.49
2021	11	12	0.66
2021	11	13	0
2021	11	14	0.03
2021	11	15	0.17
2021	11	16	14.7
2021	11	17	5.18
2021	11	18	0.05
2021	11	19	0.03
2021	11	20	1.52
2021	11	21	56.21
2021	11	22	7.82
2021	11	23	0.31
2021	11	24	0
2021	11	25	0.01
2021	11	26	0.02
2021	11	27	0.65
2021	11	28	0.1
2021	11	29	4.69
2021	11	30	0.05
2021	12	1	0
2021	12	2	0.03
2021	12	3	0
2021	12	4	0
2021	12	5	0
2021	12	6	0.02
2021	12	7	0.38
2021	12	8	0.03
2021	12	9	0
2021	12	10	0.44
2021	12	11	13.68
2021	12	12	21.84
2021	12	13	0.04
2021	12	14	0
2021	12	15	0.29
2021	12	16	7.48
2021	12	17	6.66
2021	12	18	0.88
2021	12	19	0.03
2021	12	20	0.03
2021	12	21	0
2021	12	22	0.02
2021	12	23	0
2021	12	24	5.36
2021	12	25	1.69
2021	12	26	10.28
2021	12	27	0.83
2021	12	28	0.06
2021	12	29	0
2021	12	30	0
2021	12	31	0
2022	1	1	0
2022	1	2	0
2022	1	3	0
2022	1	4	1.72
2022	1	5	0.34
2022	1	6	4.52
2022	1	7	0.71
2022	1	8	0.16
2022	1	9	0.03
2022	1	10	0.13
2022	1	11	0.03
2022	1	12	0
2022	1	13	0.28
2022	1	14	2.77
2022	1	15	0.05
2022	1	16	0
2022	1	17	0.01
2022	1	18	0.08
2022	1	19	0.12
2022	1	20	4.72
2022	1	21	13.34
2022	1	22	7.6
2022	1	23	4.46
2022	1	24	3.55
2022	1	25	7.37
2022	1	26	12.97
2022	1	27	1.33
2022	1	28	8.8
2022	1	29	10.81
2022	1	30	0
2022	1	31	0.19
2022	2	1	2.81
2022	2	2	5.1
2022	2	3	0.92
2022	2	4	0
2022	2	5	0.04
2022	2	6	11.43
2022	2	7	12.98
2022	2	8	1.46
2022	2	9	1.89
2022	2	10	0
2022	2	11	0.09
2022	2	12	0.12
2022	2	13	0.11
2022	2	14	0
2022	2	15	0
2022	2	16	0.05
2022	2	17	0.38
2022	2	18	0.18
2022	2	19	3.03
2022	2	20	1.87
2022	2	21	4.85
2022	2	22	6.06
2022	2	23	0.13
2022	2	24	0
2022	2	25	0
2022	2	26	0
2022	2	27	0
2022	2	28	0.09
2022	3	1	2.74
2022	3	2	0
2022	3	3	0.03
2022	3	4	0
2022	3	5	0.07
2022	3	6	4.7
2022	3	7	0.15
2022	3	8	0
2022	3	9	0
2022	3	10	0
2022	3	11	0
2022	3	12	0
2022	3	13	0
2022	3	14	0.03
2022	3	15	0
2022	3	16	40.07
2022	3	17	0.79
2022	3	18	0
2022	3	19	0.06
2022	3	20	6.44
2022	3	21	51.29
2022	3	22	3.39
2022	3	23	0.3
2022	3	24	0.03
2022	3	25	9.8
2022	3	26	40.51
2022	3	27	13.52
2022	3	28	0.03
2022	3	29	0.03
2022	3	30	7.82
2022	3	31	64.17
2022	4	1	32.18
2022	4	2	0.13
2022	4	3	0.03
2022	4	4	13.75
2022	4	5	4.25
2022	4	6	0.05
2022	4	7	0.08
2022	4	8	0
2022	4	9	0.03
2022	4	10	0
2022	4	11	0
2022	4	12	130.67
2022	4	13	1.1
2022	4	14	44.45
2022	4	15	44.42
2022	4	16	14.16
2022	4	17	4.87
2022	4	18	0.61
2022	4	19	0.05
2022	4	20	1.65
2022	4	21	0
2022	4	22	0.63
2022	4	23	5.08
2022	4	24	114.74
2022	4	25	2.95
2022	4	26	2.36
2022	4	27	0.07
2022	4	28	101.92
2022	4	29	0.7
2022	4	30	39.3
2022	5	1	17.77
2022	5	2	0.03
2022	5	3	0
2022	5	4	0
2022	5	5	0
2022	5	6	0
2022	5	7	0.7
2022	5	8	0.03
2022	5	9	66.51
2022	5	10	1.5
2022	5	11	3.46
2022	5	12	0.13
2022	5	13	1.28
2022	5	14	58.25
2022	5	15	12.97
2022	5	16	0.1
2022	5	17	1.24
2022	5	18	42.89
2022	5	19	10.89
2022	5	20	0
2022	5	21	16.08
2022	5	22	24.77
2022	5	23	0.11
2022	5	24	0.12
2022	5	25	31.49
2022	5	26	22.61
2022	5	27	56.8
2022	5	28	22.79
2022	5	29	6.28
2022	5	30	2.4
2022	5	31	3.3
2022	6	1	4.61
2022	6	2	14.56
2022	6	3	12.2
2022	6	4	43.76
2022	6	5	42.81
2022	6	6	0.95
2022	6	7	0.45
2022	6	8	3.26
2022	6	9	8.71
2022	6	10	0.22
2022	6	11	22.43
2022	6	12	29.27
2022	6	13	0.22
2022	6	14	0
2022	6	15	0
2022	6	16	0.47
2022	6	17	0.89
2022	6	18	4.13
2022	6	19	93.04
2022	6	20	8.2
2022	6	21	10.09
2022	6	22	5.09
[truncated: 192 more rows]
