# Supplementary material for: Multifractal analysis of vegetation regulation on ecohydrological processes in a small watershed
Source: PeerJ journal article supplement (doi:10.7717/peerj.20496), 2026-01-12
Supplement: Original_data.zip [file Runoff data.xlsx]

## Sheet: Sheet1
Time1	time	Hydrological station code	Station name	Water level	Flow
20170101	2017-01-01	60512200	Lianghe	0.43	0.0920
20170113	2017-01-13	60512200	Lianghe	237.68	3.61
20170114	2017-01-14	60512200	Lianghe	237.68	3.61
20170115	2017-01-15	60512200	Lianghe	237.66	3.23
20170116	2017-01-16	60512200	Lianghe	237.66	3.23
20170117	2017-01-17	60512200	Lianghe	237.71	4.31
20170118	2017-01-18	60512200	Lianghe	237.67	3.41
20170119	2017-01-19	60512200	Lianghe	237.66	3.23
20170120	2017-01-20	60512200	Lianghe	237.69	3.83
20170121	2017-01-21	60512200	Lianghe	237.69	3.83
20170122	2017-01-22	60512200	Lianghe	237.68	3.61
20170123	2017-01-23	60512200	Lianghe	237.66	3.23
20170124	2017-01-24	60512200	Lianghe	237.91	12.0
20170125	2017-01-25	60512200	Lianghe	237.68	3.61
20170126	2017-01-26	60512200	Lianghe	237.69	3.83
20170127	2017-01-27	60512200	Lianghe	237.69	3.83
20170128	2017-01-28	60512200	Lianghe	237.66	3.23
20170129	2017-01-29	60512200	Lianghe	237.66	3.23
20170130	2017-01-30	60512200	Lianghe	237.65	3.06
20170131	2017-01-31	60512200	Lianghe	237.65	3.06
20170201	2017-02-01	60512200	Lianghe	237.65	3.06
20170202	2017-02-02	60512200	Lianghe	237.65	3.06
20170203	2017-02-03	60512200	Lianghe	237.65	3.06
20170204	2017-02-04	60512200	Lianghe	237.70	4.06
20170205	2017-02-05	60512200	Lianghe	237.65	3.06
20170206	2017-02-06	60512200	Lianghe	237.64	2.99
20170207	2017-02-07	60512200	Lianghe	237.64	2.99
20170208	2017-02-08	60512200	Lianghe	237.65	3.06
20170209	2017-02-09	60512200	Lianghe	237.69	3.83
20170210	2017-02-10	60512200	Lianghe	237.66	3.23
20170211	2017-02-11	60512200	Lianghe	237.66	3.23
20170212	2017-02-12	60512200	Lianghe	237.66	3.23
20170213	2017-02-13	60512200	Lianghe	237.66	3.23
20170214	2017-02-14	60512200	Lianghe	237.65	3.06
20170215	2017-02-15	60512200	Lianghe	237.65	3.06
20170216	2017-02-16	60512200	Lianghe	237.65	3.06
20170217	2017-02-17	60512200	Lianghe	237.65	3.06
20170218	2017-02-18	60512200	Lianghe	237.70	4.06
20170219	2017-02-19	60512200	Lianghe	237.66	3.23
20170220	2017-02-20	60512200	Lianghe	237.66	3.23
20170221	2017-02-21	60512200	Lianghe	237.66	3.23
20170222	2017-02-22	60512200	Lianghe	237.73	4.86
20170223	2017-02-23	60512200	Lianghe	238.04	19.1
20170224	2017-02-24	60512200	Lianghe	238.06	20.4
20170225	2017-02-25	60512200	Lianghe	238.00	16.8
20170226	2017-02-26	60512200	Lianghe	237.80	7.31
20170227	2017-02-27	60512200	Lianghe	237.75	5.57
20170228	2017-02-28	60512200	Lianghe	237.95	14.0
20170301	2017-03-01	60512200	Lianghe	237.75	5.57
20170302	2017-03-02	60512200	Lianghe	237.71	4.31
20170303	2017-03-03	60512200	Lianghe	237.70	4.06
20170304	2017-03-04	60512200	Lianghe	237.70	4.06
20170305	2017-03-05	60512200	Lianghe	237.72	4.58
20170306	2017-03-06	60512200	Lianghe	237.72	4.58
20170307	2017-03-07	60512200	Lianghe	237.74	5.16
20170308	2017-03-08	60512200	Lianghe	237.97	15.1
20170309	2017-03-09	60512200	Lianghe	237.96	14.6
20170310	2017-03-10	60512200	Lianghe	237.76	5.90
20170311	2017-03-11	60512200	Lianghe	237.74	5.16
20170312	2017-03-12	60512200	Lianghe	237.94	13.5
20170313	2017-03-13	60512200	Lianghe	238.10	23.0
20170314	2017-03-14	60512200	Lianghe	238.15	26.3
20170315	2017-03-15	60512200	Lianghe	238.12	24.3
20170316	2017-03-16	60512200	Lianghe	238.04	19.1
20170317	2017-03-17	60512200	Lianghe	238.02	18.0
20170318	2017-03-18	60512200	Lianghe	237.98	15.7
20170319	2017-03-19	60512200	Lianghe	237.94	13.5
20170320	2017-03-20	60512200	Lianghe	237.90	11.5
20170321	2017-03-21	60512200	Lianghe	237.86	9.69
20170322	2017-03-22	60512200	Lianghe	237.82	8.07
20170323	2017-03-23	60512200	Lianghe	237.78	6.58
20170324	2017-03-24	60512200	Lianghe	237.74	5.16
20170325	2017-03-25	60512200	Lianghe	237.76	5.90
20170326	2017-03-26	60512200	Lianghe	237.94	13.5
20170327	2017-03-27	60512200	Lianghe	237.94	13.5
20170328	2017-03-28	60512200	Lianghe	237.75	5.57
20170329	2017-03-29	60512200	Lianghe	237.70	4.06
20170330	2017-03-30	60512200	Lianghe	237.70	4.06
20170331	2017-03-31	60512200	Lianghe	238.06	20.4
20170401	2017-04-01	60512200	Lianghe	237.34	0.799
20170402	2017-04-02	60512200	Lianghe	237.30	0.580
20170403	2017-04-03	60512200	Lianghe	237.28	0.485
20170404	2017-04-04	60512200	Lianghe	237.43	1.42
20170405	2017-04-05	60512200	Lianghe	237.71	4.31
20170406	2017-04-06	60512200	Lianghe	237.92	12.5
20170407	2017-04-07	60512200	Lianghe	237.74	5.16
20170408	2017-04-08	60512200	Lianghe	237.65	3.06
20170409	2017-04-09	60512200	Lianghe	238.00	16.8
20170410	2017-04-10	60512200	Lianghe	238.05	19.8
20170411	2017-04-11	60512200	Lianghe	237.87	1.86
20170412	2017-04-12	60512200	Lianghe	237.76	5.90
20170413	2017-04-13	60512200	Lianghe	237.68	3.61
20170414	2017-04-14	60512200	Lianghe	237.63	2.85
20170416	2017-04-16	60512200	Lianghe	237.57	2.23
20170417	2017-04-17	60512200	Lianghe	237.57	2.23
20170418	2017-04-18	60512200	Lianghe	237.34	0.799
20170419	2017-04-19	60512200	Lianghe	237.51	2.06
20170420	2017-04-20	60512200	Lianghe	237.30	0.580
20170421	2017-04-21	60512200	Lianghe	237.35	0.868
20170422	2017-04-22	60512200	Lianghe	237.53	2.18
20170423	2017-04-23	60512200	Lianghe	237.31	0.631
20170424	2017-04-24	60512200	Lianghe	237.28	0.485
20170425	2017-04-25	60512200	Lianghe	237.32	0.685
20170426	2017-04-26	60512200	Lianghe	237.78	6.58
20170427	2017-04-27	60512200	Lianghe	238.02	18.0
20170428	2017-04-28	60512200	Lianghe	237.80	7.31
20170429	2017-04-29	60512200	Lianghe	237.68	3.61
20170430	2017-04-30	60512200	Lianghe	237.61	2.60
20170501	2017-05-01	60512200	Lianghe	237.61	2.60
20170502	2017-05-02	60512200	Lianghe	237.55	2.11
20170503	2017-05-03	60512200	Lianghe	237.53	2.18
20170504	2017-05-04	60512200	Lianghe	237.89	11.0
20170505	2017-05-05	60512200	Lianghe	237.71	4.31
20170506	2017-05-06	60512200	Lianghe	237.79	6.94
20170507	2017-05-07	60512200	Lianghe	237.99	16.2
20170508	2017-05-08	60512200	Lianghe	237.83	8.47
20170509	2017-05-09	60512200	Lianghe	237.71	4.31
20170510	2017-05-10	60512200	Lianghe	237.65	3.06
20170511	2017-05-11	60512200	Lianghe	239.35	151
20170512	2017-05-12	60512200	Lianghe	238.10	23.0
20170513	2017-05-13	60512200	Lianghe	237.81	7.69
20170514	2017-05-14	60512200	Lianghe	237.70	0.640
20170515	2017-05-15	60512200	Lianghe	237.66	2.16
20170516	2017-05-16	60512200	Lianghe	237.64	2.99
20170517	2017-05-17	60512200	Lianghe	237.61	2.60
20170518	2017-05-18	60512200	Lianghe	237.56	2.16
20170519	2017-05-19	60512200	Lianghe	237.34	0.799
20170520	2017-05-20	60512200	Lianghe	237.32	0.685
20170521	2017-05-21	60512200	Lianghe	237.57	2.23
20170522	2017-05-22	60512200	Lianghe	237.60	2.49
20170523	2017-05-23	60512200	Lianghe	237.88	10.6
20170524	2017-05-24	60512200	Lianghe	237.80	7.31
20170525	2017-05-25	60512200	Lianghe	237.71	4.31
20170526	2017-05-26	60512200	Lianghe	237.64	2.99
20170527	2017-05-27	60512200	Lianghe	237.59	2.39
20170528	2017-05-28	60512200	Lianghe	237.55	2.11
20170529	2017-05-29	60512200	Lianghe	237.33	0.741
20170530	2017-05-30	60512200	Lianghe	237.31	0.631
20170531	2017-05-31	60512200	Lianghe	237.30	0.580
20170601	2017-06-01	60512200	Lianghe	237.50	2.00
20170602	2017-06-02	60512200	Lianghe	237.31	0.631
20170603	2017-06-03	60512200	Lianghe	237.28	0.485
20170604	2017-06-04	60512200	Lianghe	237.30	0.580
20170605	2017-06-05	60512200	Lianghe	238.43	48.0
20170606	2017-06-06	60512200	Lianghe	237.86	9.69
20170607	2017-06-07	60512200	Lianghe	237.72	4.58
20170608	2017-06-08	60512200	Lianghe	237.63	2.85
20170609	2017-06-09	60512200	Lianghe	237.61	2.60
20170610	2017-06-10	60512200	Lianghe	237.82	8.07
20170611	2017-06-11	60512200	Lianghe	237.69	3.83
20170612	2017-06-12	60512200	Lianghe	237.90	11.5
20170613	2017-06-13	60512200	Lianghe	237.87	10.1
20170614	2017-06-14	60512200	Lianghe	237.78	6.58
20170615	2017-06-15	60512200	Lianghe	238.17	27.7
20170616	2017-06-16	60512200	Lianghe	238.08	10.6
20170617	2017-06-17	60512200	Lianghe	237.82	8.07
20170618	2017-06-18	60512200	Lianghe	237.72	4.58
20170619	2017-06-19	60512200	Lianghe	237.67	2.23
20170620	2017-06-20	60512200	Lianghe	237.65	3.06
20170621	2017-06-21	60512200	Lianghe	237.62	2.72
20170622	2017-06-22	60512200	Lianghe	237.59	2.39
20170623	2017-06-23	60512200	Lianghe	237.35	0.868
20170624	2017-06-24	60512200	Lianghe	237.46	1.72
20170625	2017-06-25	60512200	Lianghe	237.64	2.99
20170626	2017-06-26	60512200	Lianghe	237.60	2.49
20170627	2017-06-27	60512200	Lianghe	237.57	2.23
20170628	2017-06-28	60512200	Lianghe	237.36	0.930
20170629	2017-06-29	60512200	Lianghe	237.31	0.631
20170630	2017-06-30	60512200	Lianghe	237.50	2.00
20170701	2017-07-01	60512200	Lianghe	237.49	2.31
20170702	2017-07-02	60512200	Lianghe	237.28	0.485
20170703	2017-07-03	60512200	Lianghe	237.26	0.398
20170704	2017-07-04	60512200	Lianghe	237.28	0.485
20170705	2017-07-05	60512200	Lianghe	237.26	0.398
20170706	2017-07-06	60512200	Lianghe	237.24	0.324
20170707	2017-07-07	60512200	Lianghe	237.28	0.485
20170708	2017-07-08	60512200	Lianghe	237.60	2.49
20170709	2017-07-09	60512200	Lianghe	237.57	2.23
20170710	2017-07-10	60512200	Lianghe	237.33	0.741
20170711	2017-07-11	60512200	Lianghe	237.30	0.580
20170712	2017-07-12	60512200	Lianghe	237.35	0.868
20170713	2017-07-13	60512200	Lianghe	237.25	0.360
20170714	2017-07-14	60512200	Lianghe	237.24	0.324
20170715	2017-07-15	60512200	Lianghe	237.37	0.995
20170716	2017-07-16	60512200	Lianghe	237.52	2.12
20170717	2017-07-17	60512200	Lianghe	237.49	1.93
20170718	2017-07-18	60512200	Lianghe	237.27	0.440
20170719	2017-07-19	60512200	Lianghe	237.24	0.324
20170720	2017-07-20	60512200	Lianghe	237.23	0.299
20170721	2017-07-21	60512200	Lianghe	237.45	1.64
20170722	2017-07-22	60512200	Lianghe	237.24	0.324
20170723	2017-07-23	60512200	Lianghe	237.21	0.236
20170724	2017-07-24	60512200	Lianghe	237.40	1.20
20170725	2017-07-25	60512200	Lianghe	237.20	0.210
20170726	2017-07-26	60512200	Lianghe	237.19	0.186
20170727	2017-07-27	60512200	Lianghe	237.17	0.141
20170728	2017-07-28	60512200	Lianghe	237.16	0.124
20170729	2017-07-29	60512200	Lianghe	237.17	0.141
20170730	2017-07-30	60512200	Lianghe	237.17	0.141
20170731	2017-07-31	60512200	Lianghe	237.16	0.124
20170801	2017-08-01	60512200	Lianghe	237.16	0.124
20170802	2017-08-02	60512200	Lianghe	237.17	0.141
20170803	2017-08-03	60512200	Lianghe	237.16	0.124
20170804	2017-08-04	60512200	Lianghe	237.19	0.186
20170805	2017-08-05	60512200	Lianghe	237.23	0.292
20170806	2017-08-06	60512200	Lianghe	237.26	0.398
20170807	2017-08-07	60512200	Lianghe	237.43	1.42
20170808	2017-08-08	60512200	Lianghe	237.23	0.292
20170809	2017-08-09	60512200	Lianghe	237.56	2.16
20170810	2017-08-10	60512200	Lianghe	237.30	0.580
20170811	2017-08-11	60512200	Lianghe	237.26	0.389
20170812	2017-08-12	60512200	Lianghe	237.47	1.79
20170813	2017-08-13	60512200	Lianghe	237.26	0.398
20170814	2017-08-14	60512200	Lianghe	237.24	0.324
20170815	2017-08-15	60512200	Lianghe	237.23	0.292
20170816	2017-08-16	60512200	Lianghe	237.22	0.264
20170817	2017-08-17	60512200	Lianghe	237.44	1.50
20170818	2017-08-18	60512200	Lianghe	237.22	0.264
20170819	2017-08-19	60512200	Lianghe	237.20	2.00
20170820	2017-08-20	60512200	Lianghe	237.21	0.236
20170821	2017-08-21	60512200	Lianghe	237.21	0.236
20170822	2017-08-22	60512200	Lianghe	237.20	0.210
20170823	2017-08-23	60512200	Lianghe	237.20	0.210
20170824	2017-08-24	60512200	Lianghe	237.19	0.186
20170825	2017-08-25	60512200	Lianghe	237.21	0.236
20170826	2017-08-26	60512200	Lianghe	237.55	2.11
20170827	2017-08-27	60512200	Lianghe	237.28	0.485
20170828	2017-08-28	60512200	Lianghe	237.24	0.324
20170829	2017-08-29	60512200	Lianghe	237.23	0.292
20170830	2017-08-30	60512200	Lianghe	237.45	1.50
20170831	2017-08-31	60512200	Lianghe	237.23	0.294
20170901	2017-09-01	60512200	Lianghe	237.30	0.580
20170902	2017-09-02	60512200	Lianghe	237.85	8.47
20170903	2017-09-03	60512200	Lianghe	237.78	6.58
20170904	2017-09-04	60512200	Lianghe	237.68	3.61
20170905	2017-09-05	60512200	Lianghe	237.57	2.23
20170906	2017-09-06	60512200	Lianghe	237.59	2.39
20170907	2017-09-07	60512200	Lianghe	237.57	2.23
20170908	2017-09-08	60512200	Lianghe	237.51	2.06
20170909	2017-09-09	60512200	Lianghe	237.31	0.631
20170910	2017-09-10	60512200	Lianghe	238.37	42.4
20170911	2017-09-11	60512200	Lianghe	237.91	12.0
20170912	2017-09-12	60512200	Lianghe	237.72	4.58
20170913	2017-09-13	60512200	Lianghe	237.63	2.85
20170914	2017-09-14	60512200	Lianghe	237.58	2.31
20170915	2017-09-15	60512200	Lianghe	237.55	2.11
20170916	2017-09-16	60512200	Lianghe	237.34	0.799
20170917	2017-09-17	60512200	Lianghe	237.29	0.531
20170918	2017-09-18	60512200	Lianghe	237.30	0.580
20170919	2017-09-19	60512200	Lianghe	237.82	7.69
20170920	2017-09-20	60512200	Lianghe	237.73	4.86
20170921	2017-09-21	60512200	Lianghe	237.71	4.31
20170922	2017-09-22	60512200	Lianghe	237.65	3.06
20170923	2017-09-23	60512200	Lianghe	237.60	2.49
20170924	2017-09-24	60512200	Lianghe	237.60	2.49
20170925	2017-09-25	60512200	Lianghe	237.57	2.23
20170926	2017-09-26	60512200	Lianghe	237.54	2.23
20170927	2017-09-27	60512200	Lianghe	237.43	1.42
20170928	2017-09-28	60512200	Lianghe	237.34	0.799
20170929	2017-09-29	60512200	Lianghe	237.55	2.11
20170930	2017-09-30	60512200	Lianghe	237.65	3.06
20171001	2017-10-01	60512200	Lianghe	237.62	2.72
20171002	2017-10-02	60512200	Lianghe	237.59	2.39
20171003	2017-10-03	60512200	Lianghe	237.56	2.16
20171004	2017-10-04	60512200	Lianghe	238.65	27.6
20171005	2017-10-05	60512200	Lianghe	238.96	104
20171006	2017-10-06	60512200	Lianghe	237.99	16.2
20171007	2017-10-07	60512200	Lianghe	237.81
20171008	2017-10-08	60512200	Lianghe	237.71	4.31
20171009	2017-10-09	60512200	Lianghe	237.65	3.06
20171010	2017-10-10	60512200	Lianghe	237.62	2.72
20171011	2017-10-11	60512200	Lianghe	237.69	3.83
20171012	2017-10-12	60512200	Lianghe	238.52	58.9
20171013	2017-10-13	60512200	Lianghe	237.99	16.2
20171014	2017-10-14	60512200	Lianghe	238.00	16.8
20171015	2017-10-15	60512200	Lianghe	237.94	13.5
20171016	2017-10-16	60512200	Lianghe	237.80	7.31
20171017	2017-10-17	60512200	Lianghe	237.73	4.86
20171018	2017-10-18	60512200	Lianghe	237.78	6.58
20171019	2017-10-19	60512200	Lianghe	237.73	4.86
20171020	2017-10-20	60512200	Lianghe	237.68	3.06
20171021	2017-10-21	60512200	Lianghe	237.65	3.06
20171022	2017-10-22	60512200	Lianghe	237.65	3.06
20171023	2017-10-23	60512200	Lianghe	237.67	3.41
20171024	2017-10-24	60512200	Lianghe	237.65	3.06
20171025	2017-10-25	60512200	Lianghe	237.62	2.72
20171026	2017-10-26	60512200	Lianghe	237.61	2.60
20171027	2017-10-27	60512200	Lianghe	237.61	2.60
20171028	2017-10-28	60512200	Lianghe	237.36	0.930
20171029	2017-10-29	60512200	Lianghe	237.34	0.799
20171030	2017-10-30	60512200	Lianghe	237.32	0.685
20171031	2017-10-31	60512200	Lianghe	237.54	2.23
20171101	2017-11-01	60512200	Lianghe	237.35	0.868
20171102	2017-11-02	60512200	Lianghe	237.34	0.799
20171103	2017-11-03	60512200	Lianghe	237.33	0.741
20171104	2017-11-04	60512200	Lianghe	237.32	0.685
20171105	2017-11-05	60512200	Lianghe	237.32	0.685
20171106	2017-11-06	60512200	Lianghe	237.52	2.12
20171107	2017-11-07	60512200	Lianghe	237.31	0.631
20171108	2017-11-08	60512200	Lianghe	237.30	0.580
20171109	2017-11-09	60512200	Lianghe	237.36	0.930
20171110	2017-11-10	60512200	Lianghe	237.30	0.580
20171111	2017-11-11	60512200	Lianghe
20171112	2017-11-12	60512200	Lianghe	237.69	3.83
20171113	2017-11-13	60512200	Lianghe	237.47	1.79
20171114	2017-11-14	60512200	Lianghe	237.39	1.13
20171115	2017-11-15	60512200	Lianghe	237.54	2.23
20171116	2017-11-16	60512200	Lianghe	237.42	1.35
20171117	2017-11-17	60512200	Lianghe	237.34	0.799
20171118	2017-11-18	60512200	Lianghe	237.58	2.31
20171119	2017-11-19	60512200	Lianghe	237.36	0.930
20171120	2017-11-20	60512200	Lianghe	237.34	0.799
20171121	2017-11-21	60512200	Lianghe	237.49	1.93
20171122	2017-11-22	60512200	Lianghe	237.28	0.485
20171123	2017-11-23	60512200	Lianghe	237.27	0.440
20171124	2017-11-24	60512200	Lianghe	237.27	0.440
20171125	2017-11-25	60512200	Lianghe	237.27	0.440
20171126	2017-11-26	60512200	Lianghe	237.26	0.398
20171127	2017-11-27	60512200	Lianghe	237.49	1.93
20171128	2017-11-28	60512200	Lianghe	237.47	1.79
20171129	2017-11-29	60512200	Lianghe	237.27	0.440
20171130	2017-11-30	60512200	Lianghe	237.28	0.485
20171201	2017-12-01	60512200	Lianghe	237.26	0.398
20171202	2017-12-02	60512200	Lianghe	237.26	0.398
20171203	2017-12-03	60512200	Lianghe	237.27	0.440
20171204	2017-12-04	60512200	Lianghe	237.26	0.398
20171205	2017-12-05	60512200	Lianghe	237.50	2.00
20171206	2017-12-06	60512200	Lianghe	237.45	1.64
20171207	2017-12-07	60512200	Lianghe	237.26	0.398
20171208	2017-12-08	60512200	Lianghe	237.25	0.360
20171209	2017-12-09	60512200	Lianghe	237.26	0.398
20171210	2017-12-10	60512200	Lianghe	237.25	0.360
20171211	2017-12-11	60512200	Lianghe	237.25	0.360
20171212	2017-12-12	60512200	Lianghe	237.23	0.292
20171213	2017-12-13	60512200	Lianghe	237.24	0.324
20171214	2017-12-14	60512200	Lianghe	237.25	0.360
20171215	2017-12-15	60512200	Lianghe	237.46	1.72
20171216	2017-12-16	60512200	Lianghe	237.25	0.360
20171217	2017-12-17	60512200	Lianghe	237.24	0.324
20171218	2017-12-18	60512200	Lianghe	237.24	0.324
20171219	2017-12-19	60512200	Lianghe	237.23	0.292
20171220	2017-12-20	60512200	Lianghe	237.22	0.264
20171221	2017-12-21	60512200	Lianghe	237.25	0.360
20171222	2017-12-22	60512200	Lianghe	237.25	0.360
20171223	2017-12-23	60512200	Lianghe	237.47	1.79
20171224	2017-12-24	60512200	Lianghe	237.24	0.324
20171225	2017-12-25	60512200	Lianghe	237.22	0.264
20171226	2017-12-26	60512200	Lianghe	237.22	0.264
20171227	2017-12-27	60512200	Lianghe	237.22	0.264
20171228	2017-12-28	60512200	Lianghe	237.22	0.264
20171229	2017-12-29	60512200	Lianghe	237.22	0.264
20171230	2017-12-30	60512200	Lianghe	237.22	0.264
20171231	2017-12-31	60512200	Lianghe	237.23	0.292
20180101	2018-01-01	60512200	Lianghe	237.23	0.292
20180102	2018-01-02	60512200	Lianghe	237.27	0.440
20180103	2018-01-03	60512200	Lianghe	237.23	0.292
20180104	2018-01-04	60512200	Lianghe	237.24	0.324
20180105	2018-01-05	60512200	Lianghe	237.27	0.440
20180106	2018-01-06	60512200	Lianghe	237.25	0.360
20180107	2018-01-07	60512200	Lianghe	237.48	1.86
20180108	2018-01-08	60512200	Lianghe	237.30	0.580
20180109	2018-01-09	60512200	Lianghe	237.29	0.531
20180110	2018-01-10	60512200	Lianghe	237.27	0.440
20180111	2018-01-11	60512200	Lianghe	237.25	0.360
20180112	2018-01-12	60512200	Lianghe	237.28	0.485
20180113	2018-01-13	60512200	Lianghe	237.28	0.485
20180114	2018-01-14	60512200	Lianghe	237.26	0.398
20180115	2018-01-15	60512200	Lianghe	237.23	0.292
20180116	2018-01-16	60512200	Lianghe	237.24	0.324
20180117	2018-01-17	60512200	Lianghe	237.25	0.360
20180118	2018-01-18	60512200	Lianghe	237.25	0.360
20180119	2018-01-19	60512200	Lianghe	237.24	0.324
20180120	2018-01-20	60512200	Lianghe	237.26	0.398
20180121	2018-01-21	60512200	Lianghe	237.28	0.485
20180122	2018-01-22	60512200	Lianghe	237.28	0.485
20180123	2018-01-23	60512200	Lianghe	237.27	0.440
20180124	2018-01-24	60512200	Lianghe	237.26	0.398
20180125	2018-01-25	60512200	Lianghe	237.25	0.360
20180126	2018-01-26	60512200	Lianghe	237.25	0.360
20180127	2018-01-27	60512200	Lianghe	237.25	0.360
20180128	2018-01-28	60512200	Lianghe	237.26	0.398
20180129	2018-01-29	60512200	Lianghe	237.26	0.398
20180130	2018-01-30	60512200	Lianghe	237.23	0.292
20180131	2018-01-31	60512200	Lianghe	237.22	0.264
20180201	2018-02-01	60512200	Lianghe	237.20	0.210
20180202	2018-02-02	60512200	Lianghe	237.21	0.236
20180203	2018-02-03	60512200	Lianghe	237.21	0.236
20180204	2018-02-04	60512200	Lianghe	237.25	0.360
20180205	2018-02-05	60512200	Lianghe	237.25	0.360
20180206	2018-02-06	60512200	Lianghe	237.21	0.236
20180207	2018-02-07	60512200	Lianghe	237.20	0.210
20180208	2018-02-08	60512200	Lianghe	237.19	0.186
20180209	2018-02-09	60512200	Lianghe	237.21	0.236
20180210	2018-02-10	60512200	Lianghe	237.22	0.264
20180211	2018-02-11	60512200	Lianghe	237.22	0.264
20180212	2018-02-12	60512200	Lianghe	237.45	1.64
20180213	2018-02-13	60512200	Lianghe	237.24	0.324
20180214	2018-02-14	60512200	Lianghe	237.23	0.292
20180215	2018-02-15	60512200	Lianghe	237.23	0.292
20180216	2018-02-16	60512200	Lianghe	237.21	0.236
20180217	2018-02-17	60512200	Lianghe	237.23	0.292
20180218	2018-02-18	60512200	Lianghe	237.24	0.324
20180219	2018-02-19	60512200	Lianghe	237.26	0.398
20180220	2018-02-20	60512200	Lianghe	237.26	0.398
20180221	2018-02-21	60512200	Lianghe	237.27	0.440
20180222	2018-02-22	60512200	Lianghe	237.27	0.440
20180223	2018-02-23	60512200	Lianghe	237.30	0.580
20180224	2018-02-24	60512200	Lianghe	237.48	1.86
20180225	2018-02-25	60512200	Lianghe	237.30	0.580
20180226	2018-02-26	60512200	Lianghe	237.27	0.440
20180227	2018-02-27	60512200	Lianghe	237.26	0.398
20180228	2018-02-28	60512200	Lianghe	237.26	0.398
20180301	2018-03-01	60512200	Lianghe	237.25	0.360
20180302	2018-03-02	60512200	Lianghe	237.25	0.360
20180303	2018-03-03	60512200	Lianghe	237.25	0.360
20180304	2018-03-04	60512200	Lianghe	237.27	0.440
20180305	2018-03-05	60512200	Lianghe	237.27	0.440
20180306	2018-03-06	60512200	Lianghe	237.25	0.360
20180308	2018-03-08	60512200	Lianghe	237.29	0.531
20180309	2018-03-09	60512200	Lianghe	237.28	0.485
20180310	2018-03-10	60512200	Lianghe	237.30	0.580
20180311	2018-03-11	60512200	Lianghe	237.29	0.531
20180312	2018-03-12	60512200	Lianghe	237.27	0.440
20180313	2018-03-13	60512200	Lianghe	237.25	0.360
20180314	2018-03-14	60512200	Lianghe	237.35	0.868
20180315	2018-03-15	60512200	Lianghe	237.32	0.685
20180316	2018-03-16	60512200	Lianghe	237.29	0.531
20180317	2018-03-17	60512200	Lianghe	237.31	0.631
20180318	2018-03-18	60512200	Lianghe	237.30	0.580
20180319	2018-03-19	60512200	Lianghe	237.35	0.868
20180320	2018-03-20	60512200	Lianghe	237.68	3.61
20180321	2018-03-21	60512200	Lianghe	237.62	2.72
20180322	2018-03-22	60512200	Lianghe	237.52	2.12
20180323	2018-03-23	60512200	Lianghe	237.33	0.741
20180324	2018-03-24	60512200	Lianghe	237.34	0.799
20180325	2018-03-25	60512200	Lianghe	237.37	0.995
20180326	2018-03-26	60512200	Lianghe	237.37	0.995
20180327	2018-03-27	60512200	Lianghe	237.36	0.930
20180328	2018-03-28	60512200	Lianghe	237.34	0.799
20180329	2018-03-29	60512200	Lianghe	237.35	0.868
20180330	2018-03-30	60512200	Lianghe	237.34	0.799
20180331	2018-03-31	60512200	Lianghe	237.78	6.58
20180401	2018-04-01	60512200	Lianghe	238.22	31.2
20180402	2018-04-02	60512200	Lianghe	238.66	73.7
20180403	2018-04-03	60512200	Lianghe	237.67	3.41
20180404	2018-04-04	60512200	Lianghe	237.40	1.20
20180405	2018-04-05	60512200	Lianghe	237.74	5.16
20180406	2018-04-06	60512200	Lianghe	237.91	12.0
20180407	2018-04-07	60512200	Lianghe	237.75	5.57
20180408	2018-04-08	60512200	Lianghe	237.68	3.61
20180409	2018-04-09	60512200	Lianghe	237.64	2.99
20180410	2018-04-10	60512200	Lianghe	237.60	2.49
20180411	2018-04-11	60512200	Lianghe	237.40	1.20
20180412	2018-04-12	60512200	Lianghe	237.45	1.64
20180413	2018-04-13	60512200	Lianghe	237.43	1.42
20180414	2018-04-14	60512200	Lianghe	237.99	16.2
20180415	2018-04-15	60512200	Lianghe	237.91	12.0
20180416	2018-04-16	60512200	Lianghe	237.75	5.57
20180417	2018-04-17	60512200	Lianghe	237.68	3.61
20180418	2018-04-18	60512200	Lianghe	237.62	2.72
20180419	2018-04-19	60512200	Lianghe	237.59	2.39
20180420	2018-04-20	60512200	Lianghe	237.53	2.18
20180421	2018-04-21	60512200	Lianghe	237.50	2.00
20180422	2018-04-22	60512200	Lianghe	238.63	70.6
20180423	2018-04-23	60512200	Lianghe	238.13	25.0
20180424	2018-04-24	60512200	Lianghe	238.13	25.0
20180425	2018-04-25	60512200	Lianghe	238.35	40.6
20180426	2018-04-26	60512200	Lianghe	238.06	20.4
20180429	2018-04-29	60512200	Lianghe	237.74	5.26
20180430	2018-04-30	60512200	Lianghe	237.71	4.32
20180501	2018-05-01	60512200	Lianghe	237.80	7.70
20180502	2018-05-02	60512200	Lianghe	237.72	4.61
20180503	2018-05-03	60512200	Lianghe	237.68	3.55
20180504	2018-05-04	60512200	Lianghe	237.44	1.46
20180505	2018-05-05	60512200	Lianghe	238.48	56.1
20180506	2018-05-06	60512200	Lianghe	238.31	41.2
20180507	2018-05-07	60512200	Lianghe	238.00	18.1
20180508	2018-05-08	60512200	Lianghe	237.84	9.46
20180509	2018-05-09	60512200	Lianghe	237.68	3.55
20180510	2018-05-10	60512200	Lianghe	237.71	4.32
20180511	2018-05-11	60512200	Lianghe	237.71	4.32
20180512	2018-05-12	60512200	Lianghe	237.71	4.32
20180513	2018-05-13	60512200	Lianghe	237.68	3.55
20180514	2018-05-14	60512200	Lianghe	237.51	1.97
20180515	2018-05-15	60512200	Lianghe	237.40	1.16
20180516	2018-05-16	60512200	Lianghe	237.32	0.533
20180518	2018-05-18	60512200	Lianghe	238.06	21.8
20180519	2018-05-19	60512200	Lianghe	237.81	8.12
20180520	2018-05-20	60512200	Lianghe	237.68	3.55
20180521	2018-05-21	60512200	Lianghe	237.62	2.62
20180522	2018-05-22	60512200	Lianghe	237.59	2.28
20180523	2018-05-23	60512200	Lianghe	237.88	11.4
20180524	2018-05-24	60512200	Lianghe	237.74	5.26
20180525	2018-05-25	60512200	Lianghe	237.68	3.55
20180526	2018-05-26	60512200	Lianghe	237.66	3.14
20180527	2018-05-27	60512200	Lianghe	237.71	4.32
20180528	2018-05-28	60512200	Lianghe	237.71	4.32
20180529	2018-05-29	60512200	Lianghe	237.64	2.90
20180530	2018-05-30	60512200	Lianghe	237.61	2.49
20180531	2018-05-31	60512200	Lianghe	237.69	3.78
20180601	2018-06-01	60512200	Lianghe	237.67	3.33
20180602	2018-06-02	60512200	Lianghe	237.63	2.75
20180603	2018-06-03	60512200	Lianghe	237.59	2.28
20180604	2018-06-04	60512200	Lianghe	237.37	0.937
20180605	2018-06-05	60512200	Lianghe	237.38	1.01
20180606	2018-06-06	60512200	Lianghe	237.45	1.57
20180607	2018-06-07	60512200	Lianghe	237.32	0.533
20180608	2018-06-08	60512200	Lianghe	237.29	0.370
20180609	2018-06-09	60512200	Lianghe	237.32	0.533
20180610	2018-06-10	60512200	Lianghe	237.28	0.325
20180611	2018-06-11	60512200	Lianghe	237.26	0.247
20180612	2018-06-12	60512200	Lianghe	237.44	1.46
20180613	2018-06-13	60512200	Lianghe	237.37	0.937
20180614	2018-06-14	60512200	Lianghe	237.56	2.05
20180615	2018-06-15	60512200	Lianghe	237.27	0.284
20180616	2018-06-16	60512200	Lianghe	237.33	0.596
20180617	2018-06-17	60512200	Lianghe	237.25	0.215
20180618	2018-06-18	60512200	Lianghe	237.26	0.247
20180619	2018-06-19	60512200	Lianghe		0.474
20180620	2018-06-20	60512200	Lianghe	237.29	0.370
20180621	2018-06-21	60512200	Lianghe	237.53	2.08
20180622	2018-06-22	60512200	Lianghe	237.43	1.38
20180623	2018-06-23	60512200	Lianghe	237.38	1.01
20180624	2018-06-24	60512200	Lianghe	237.43	1.38
20180625	2018-06-25	60512200	Lianghe	237.36	0.863
20180626	2018-06-26	60512200	Lianghe	237.51	1.97
20180627	2018-06-27	60512200	Lianghe	237.29	0.100
20180628	2018-06-28	60512200	Lianghe	237.25	0.215
20180629	2018-06-29	60512200	Lianghe	237.27	0.284
20180630	2018-06-30	60512200	Lianghe	237.24	0.214
20180701	2018-07-01	60512200	Lianghe	237.23	0.187
20180702	2018-07-02	60512200	Lianghe	237.48	1.78
20180703	2018-07-03	60512200	Lianghe	237.46	1.64
20180704	2018-07-04	60512200	Lianghe	237.43	1.38
20180705	2018-07-05	60512200	Lianghe	237.63	2.75
20180706	2018-07-06	60512200	Lianghe	237.63	2.75
20180707	2018-07-07	60512200	Lianghe	238.11	25.3
20180708	2018-07-08	60512200	Lianghe	237.74	5.26
20180709	2018-07-09	60512200	Lianghe	237.63	2.75
20180710	2018-07-10	60512200	Lianghe	237.57	2.11
20180711	2018-07-11	60512200	Lianghe	237.55	2.00
20180712	2018-07-12	60512200	Lianghe	237.49	1.85
20180713	2018-07-13	60512200	Lianghe	237.29	0.370
20180714	2018-07-14	60512200	Lianghe	237.27	0.284
20180715	2018-07-15	60512200	Lianghe	237.43	1.38
20180716	2018-07-16	60512200	Lianghe	237.25	0.215
20180717	2018-07-17	60512200	Lianghe	237.23	0.187
20180718	2018-07-18	60512200	Lianghe	237.22	0.163
20180719	2018-07-19	60512200	Lianghe	237.20	0.119
20180720	2018-07-20	60512200	Lianghe	237.21	0.140
20180721	2018-07-21	60512200	Lianghe	237.20	0.119
20180722	2018-07-22	60512200	Lianghe	237.19	0.100
20180723	2018-07-23	60512200	Lianghe	237.20	0.119
20180724	2018-07-24	60512200	Lianghe	237.20	0.119
20180725	2018-07-25	60512200	Lianghe	237.19	0.100
20180726	2018-07-26	60512200	Lianghe	237.18	0.0840
20180727	2018-07-27	60512200	Lianghe	237.18	0.0840
20180728	2018-07-28	60512200	Lianghe	237.44	1.46
20180729	2018-07-29	60512200	Lianghe	237.20	0.119
20180730	2018-07-30	60512200	Lianghe	237.19	0.100
20180731	2018-07-31	60512200	Lianghe	237.29	0.370
20180801	2018-08-01	60512200	Lianghe	237.23	0.187
20180802	2018-08-02	60512200	Lianghe	237.32	0.533
20180803	2018-08-03	60512200	Lianghe	237.24	0.124
20180804	2018-08-04	60512200	Lianghe	237.24	0.214
20180805	2018-08-05	60512200	Lianghe	237.25	0.215
20180806	2018-08-06	60512200	Lianghe	237.44	1.46
20180807	2018-08-07	60512200	Lianghe	237.24	0.214
20180808	2018-08-08	60512200	Lianghe	237.24	0.214
20180809	2018-08-09	60512200	Lianghe	237.22	0.163
20180810	2018-08-10	60512200	Lianghe	237.20	0.119
20180811	2018-08-11	60512200	Lianghe	237.24	0.214
20180812	2018-08-12	60512200	Lianghe	237.24	0.214
20180813	2018-08-13	60512200	Lianghe	237.21	0.140
20180814	2018-08-14	60512200	Lianghe	237.19	0.100
20180815	2018-08-15	60512200	Lianghe	237.23	0.187
20180816	2018-08-16	60512200	Lianghe	237.19	0.100
20180817	2018-08-17	60512200	Lianghe	237.18	0.0840
20180818	2018-08-18	60512200	Lianghe	237.17	0.0690
20180819	2018-08-19	60512200	Lianghe	237.17	0.0690
20180820	2018-08-20	60512200	Lianghe	237.16	0.0570
20180821	2018-08-21	60512200	Lianghe	237.17	0.0690
20180822	2018-08-22	60512200	Lianghe	237.37	0.937
20180823	2018-08-23	60512200	Lianghe	237.93	14.0
20180824	2018-08-24	60512200	Lianghe	237.56	2.05
20180825	2018-08-25	60512200	Lianghe	237.51	1.97
20180826	2018-08-26	60512200	Lianghe	237.41	1.23
20180827	2018-08-27	60512200	Lianghe	237.25	0.215
20180828	2018-08-28	60512200	Lianghe	237.29	0.370
20180829	2018-08-29	60512200	Lianghe	237.25	0.215
20180830	2018-08-30	60512200	Lianghe	237.45	1.57
20180831	2018-08-31	60512200	Lianghe	237.27	0.284
20180901	2018-09-01	60512200	Lianghe	237.26	0.247
20180902	2018-09-02	60512200	Lianghe	237.22	0.163
20180903	2018-09-03	60512200	Lianghe	237.20	0.119
20180904	2018-09-04	60512200	Lianghe	237.17	0.0690
20180905	2018-09-05	60512200	Lianghe	237.17	0.0690
20180906	2018-09-06	60512200	Lianghe	237.27	0.284
20180907	2018-09-07	60512200	Lianghe	237.19	0.100
20180908	2018-09-08	60512200	Lianghe	237.19	0.100
20180909	2018-09-09	60512200	Lianghe	237.18	0.0840
20180910	2018-09-10	60512200	Lianghe	237.20	0.119
20180911	2018-09-11	60512200	Lianghe	237.22	0.163
20180912	2018-09-12	60512200	Lianghe	237.20	0.119
20180913	2018-09-13	60512200	Lianghe	237.22	0.163
20180914	2018-09-14	60512200	Lianghe	237.20	0.119
20180915	2018-09-15	60512200	Lianghe	237.20	0.119
20180916	2018-09-16	60512200	Lianghe	237.19	0.100
20180917	2018-09-17	60512200	Lianghe	237.19	0.100
20180918	2018-09-18	60512200	Lianghe	237.19	0.100
20180919	2018-09-19	60512200	Lianghe	237.20	0.119
20180920	2018-09-20	60512200	Lianghe	237.19	0.100
20180921	2018-09-21	60512200	Lianghe	237.24	0.214
20180922	2018-09-22	60512200	Lianghe	237.27	0.284
20180923	2018-09-23	60512200	Lianghe	237.39	1.09
20180924	2018-09-24	60512200	Lianghe	237.24	0.214
20180925	2018-09-25	60512200	Lianghe	238.03	20.0
20180926	2018-09-26	60512200	Lianghe	237.83	9.00
20180927	2018-09-27	60512200	Lianghe	237.66	3.14
20180928	2018-09-28	60512200	Lianghe	237.56	2.05
20180929	2018-09-29	60512200	Lianghe	237.55	2.00
20180930	2018-09-30	60512200	Lianghe	237.50	1.91
20181001	2018-10-01	60512200	Lianghe	237.30	0.420
20181002	2018-10-02	60512200	Lianghe	237.30	0.420
20181003	2018-10-03	60512200	Lianghe	237.30	0.420
20181004	2018-10-04	60512200	Lianghe	237.48	1.78
20181005	2018-10-05	60512200	Lianghe	237.27	0.284
20181006	2018-10-06	60512200	Lianghe	237.26	0.247
20181007	2018-10-07	60512200	Lianghe	237.46	1.64
20181008	2018-10-08	60512200	Lianghe	237.36	0.863
20181009	2018-10-09	60512200	Lianghe	237.28	0.325
20181010	2018-10-10	60512200	Lianghe	237.29	0.370
20181011	2018-10-11	60512200	Lianghe	237.48	1.78
20181012	2018-10-12	60512200	Lianghe	237.26	0.247
20181013	2018-10-13	60512200	Lianghe	237.24	0.214
20181014	2018-10-14	60512200	Lianghe	237.23	0.187
20181015	2018-10-15	60512200	Lianghe	237.22	0.163
20181016	2018-10-16	60512200	Lianghe	237.23	0.187
20181017	2018-10-17	60512200	Lianghe	237.45	1.57
20181018	2018-10-18	60512200	Lianghe	237.23	0.187
20181019	2018-10-19	60512200	Lianghe	237.23	0.187
20181020	2018-10-20	60512200	Lianghe	237.31	0.474
20181021	2018-10-21	60512200	Lianghe	237.33	0.596
20181022	2018-10-22	60512200	Lianghe	237.50	1.91
20181023	2018-10-23	60512200	Lianghe	237.48	1.78
20181024	2018-10-24	60512200	Lianghe	237.27	0.284
20181025	2018-10-25	60512200	Lianghe	237.26	0.247
20181026	2018-10-26	60512200	Lianghe	237.45	1.57
20181027	2018-10-27	60512200	Lianghe	237.26	0.247
20181028	2018-10-28	60512200	Lianghe	237.26	0.247
20181029	2018-10-29	60512200	Lianghe	237.27	0.284
20181030	2018-10-30	60512200	Lianghe	237.23	0.187
20181031	2018-10-31	60512200	Lianghe	237.46	1.64
20181101	2018-11-01	60512200	Lianghe	237.24	0.214
20181102	2018-11-02	60512200	Lianghe	237.24	0.214
20181103	2018-11-03	60512200	Lianghe	237.26	0.247
20181104	2018-11-04	60512200	Lianghe	237.21	0.140
20181105	2018-11-05	60512200	Lianghe	237.22	0.163
20181106	2018-11-06	60512200	Lianghe	237.54	2.13
20181107	2018-11-07	60512200	Lianghe	237.75	5.74
20181108	2018-11-08	60512200	Lianghe	237.81	8.12
20181109	2018-11-09	60512200	Lianghe	237.70	4.04
20181110	2018-11-10	60512200	Lianghe	237.65	2.96
20181111	2018-11-11	60512200	Lianghe	237.61	2.49
20181112	2018-11-12	60512200	Lianghe	237.61	2.49
20181113	2018-11-13	60512200	Lianghe	237.58	2.19
20181115	2018-11-15	60512200	Lianghe	237.29	0.370
20181116	2018-11-16	60512200	Lianghe	237.30	0.420
20181117	2018-11-17	60512200	Lianghe	237.50	1.91
20181118	2018-11-18	60512200	Lianghe	237.34	0.663
20181119	2018-11-19	60512200	Lianghe	237.68	3.55
20181120	2018-11-20	60512200	Lianghe	237.64	2.90
20181121	2018-11-21	60512200	Lianghe	237.60	2.38
20181122	2018-11-22	60512200	Lianghe	237.54	2.13
20181123	2018-11-23	60512200	Lianghe	237.35	0.789
20181124	2018-11-24	60512200	Lianghe	237.35	0.789
20181125	2018-11-25	60512200	Lianghe	237.33	0.596
20181126	2018-11-26	60512200	Lianghe	237.32	0.533
20181127	2018-11-27	60512200	Lianghe	237.53	2.08
20181128	2018-11-28	60512200	Lianghe	237.30	0.420
20181129	2018-11-29	60512200	Lianghe	237.30	0.420
20181201	2018-12-01	60512200	Lianghe	237.30	0.420
20181202	2018-12-02	60512200	Lianghe	237.30	0.420
20181203	2018-12-03	60512200	Lianghe	237.29	0.370
20181204	2018-12-04	60512200	Lianghe	237.27	0.284
20181205	2018-12-05	60512200	Lianghe	237.50	1.91
20181206	2018-12-06	60512200	Lianghe	237.30	0.420
20181207	2018-12-07	60512200	Lianghe	237.30	0.420
20181208	2018-12-08	60512200	Lianghe	237.48	1.78
20181209	2018-12-09	60512200	Lianghe	237.28	0.325
20181210	2018-12-10	60512200	Lianghe	237.46	1.64
20181211	2018-12-11	60512200	Lianghe	237.26	0.247
20181212	2018-12-12	60512200	Lianghe	237.25	0.215
20181213	2018-12-13	60512200	Lianghe	237.25	0.215
20181214	2018-12-14	60512200	Lianghe	237.24	0.214
20181215	2018-12-15	60512200	Lianghe	237.45	1.57
20181216	2018-12-16	60512200	Lianghe	237.25	0.215
20181217	2018-12-17	60512200	Lianghe	237.24	0.214
20181218	2018-12-18	60512200	Lianghe	237.24	0.214
20181219	2018-12-19	60512200	Lianghe	237.24	0.214
20181220	2018-12-20	60512200	Lianghe	237.24	0.214
20181221	2018-12-21	60512200	Lianghe	237.25	0.215
20181222	2018-12-22	60512200	Lianghe	237.46	1.64
20181223	2018-12-23	60512200	Lianghe	237.27	0.284
20181224	2018-12-24	60512200	Lianghe	237.26	0.247
20181225	2018-12-25	60512200	Lianghe	237.30	0.420
20181226	2018-12-26	60512200	Lianghe	237.31	0.474
20181227	2018-12-27	60512200	Lianghe	237.29	0.370
20181228	2018-12-28	60512200	Lianghe	237.30	0.420
20181229	2018-12-29	60512200	Lianghe	237.48	1.78
20181230	2018-12-30	60512200	Lianghe	237.28	0.325
20181231	2018-12-31	60512200	Lianghe	237.27	0.284
20190101	2019-01-01	60512200	Lianghe	237.27	0.284
20190102	2019-01-02	60512200	Lianghe	237.26	0.247
20190103	2019-01-03	60512200	Lianghe	237.25	0.215
20190104	2019-01-04	60512200	Lianghe	237.26	0.247
20190105	2019-01-05	60512200	Lianghe	237.26	0.247
20190106	2019-01-06	60512200	Lianghe	237.27	0.284
20190107	2019-01-07	60512200	Lianghe	237.48	1.78
20190108	2019-01-08	60512200	Lianghe	237.27	0.284
20190109	2019-01-09	60512200	Lianghe	237.26	0.247
20190110	2019-01-10	60512200	Lianghe	237.25	0.215
20190111	2019-01-11	60512200	Lianghe	237.26	0.247
20190112	2019-01-12	60512200	Lianghe	237.26	0.247
20190113	2019-01-13	60512200	Lianghe	237.28	0.325
20190114	2019-01-14	60512200	Lianghe	237.28	0.325
20190115	2019-01-15	60512200	Lianghe	237.28	0.325
20190116	2019-01-16	60512200	Lianghe	237.38	1.01
20190117	2019-01-17	60512200	Lianghe	237.31	0.474
20190118	2019-01-18	60512200	Lianghe	237.29	0.370
20190119	2019-01-19	60512200	Lianghe	237.28	0.325
20190120	2019-01-20	60512200	Lianghe	237.28	0.325
20190121	2019-01-21	60512200	Lianghe	237.29	0.370
20190122	2019-01-22	60512200	Lianghe	237.27	0.284
20190123	2019-01-23	60512200	Lianghe	237.51	1.97
20190124	2019-01-24	60512200	Lianghe	237.31	0.474
20190125	2019-01-25	60512200	Lianghe	237.27	0.284
20190126	2019-01-26	60512200	Lianghe	237.27	0.284
20190127	2019-01-27	60512200	Lianghe	237.26	0.247
20190128	2019-01-28	60512200	Lianghe	237.25	0.215
20190129	2019-01-29	60512200	Lianghe	237.31	0.474
20190130	2019-01-30	60512200	Lianghe	237.27	0.284
20190131	2019-01-31	60512200	Lianghe	237.32	0.533
20190201	2019-02-01	60512200	Lianghe	237.29	0.370
20190202	2019-02-02	60512200	Lianghe	237.29	0.370
20190203	2019-02-03	60512200	Lianghe	237.53	2.08
20190204	2019-02-04	60512200	Lianghe	237.31	0.474
20190205	2019-02-05	60512200	Lianghe	237.28	0.325
20190206	2019-02-06	60512200	Lianghe	237.28	0.325
20190207	2019-02-07	60512200	Lianghe	237.28	0.325
20190208	2019-02-08	60512200	Lianghe	237.27	0.284
20190209	2019-02-09	60512200	Lianghe	237.31	0.474
20190210	2019-02-10	60512200	Lianghe	237.26	0.247
20190211	2019-02-11	60512200	Lianghe	237.50	1.91
20190212	2019-02-12	60512200	Lianghe	237.26	0.247
20190213	2019-02-13	60512200	Lianghe	237.30	0.420
20190214	2019-02-14	60512200	Lianghe	237.24	0.214
20190215	2019-02-15	60512200	Lianghe	237.24	0.214
20190216	2019-02-16	60512200	Lianghe	237.23	0.187
20190217	2019-02-17	60512200	Lianghe	237.23	0.187
20190218	2019-02-18	60512200	Lianghe	237.23	0.187
20190219	2019-02-19	60512200	Lianghe	237.22	0.163
20190220	2019-02-20	60512200	Lianghe	237.22	0.163
20190221	2019-02-21	60512200	Lianghe	237.23	0.187
20190222	2019-02-22	60512200	Lianghe	237.44	1.46
20190223	2019-02-23	60512200	Lianghe	237.24	0.214
20190224	2019-02-24	60512200	Lianghe	237.21	0.140
20190225	2019-02-25	60512200	Lianghe	237.22	0.163
20190226	2019-02-26	60512200	Lianghe	237.21	0.140
20190227	2019-02-27	60512200	Lianghe	237.22	0.163
20190228	2019-02-28	60512200	Lianghe	237.23	0.187
20190301	2019-03-01	60512200	Lianghe	237.24	0.214
20190302	2019-03-02	60512200	Lianghe	237.23	0.187
20190307	2019-03-07	60512200	Lianghe	237.20	0.119
20190308	2019-03-08	60512200	Lianghe	237.18	0.0840
20190309	2019-03-09	60512200	Lianghe	237.17	0.0690
20190310	2019-03-10	60512200	Lianghe	237.17	0.0690
20190311	2019-03-11	60512200	Lianghe	237.17	0.0690
20190314	2019-03-14	60512200	Lianghe	237.18	0.0840
20190315	2019-03-15	60512200	Lianghe	237.18	0.0840
20190316	2019-03-16	60512200	Lianghe	237.18	0.0840
20190317	2019-03-17	60512200	Lianghe	237.27	0.284
20190318	2019-03-18	60512200	Lianghe	237.19	0.100
20190319	2019-03-19	60512200	Lianghe	237.18	0.0840
20190320	2019-03-20	60512200	Lianghe	237.18	0.0840
20190321	2019-03-21	60512200	Lianghe	237.18	0.0840
20190322	2019-03-22	60512200	Lianghe	237.23	0.187
20190323	2019-03-23	60512200	Lianghe	237.31	0.474
20190324	2019-03-24	60512200	Lianghe	237.33	0.596
20190325	2019-03-25	60512200	Lianghe	237.28	0.325
20190326	2019-03-26	60512200	Lianghe	237.26	0.247
20190327	2019-03-27	60512200	Lianghe	237.47	1.71
20190328	2019-03-28	60512200	Lianghe	237.25	0.215
20190329	2019-03-29	60512200	Lianghe	237.25	0.215
20190330	2019-03-30	60512200	Lianghe	237.23	0.187
20190331	2019-03-31	60512200	Lianghe	237.29	0.370
20190401	2019-04-01	60512200	Lianghe	237.33	0.596
20190402	2019-04-02	60512200	Lianghe	237.27	0.284
20190403	2019-04-03	60512200	Lianghe	237.26	0.247
20190404	2019-04-04	60512200	Lianghe	237.49	1.85
20190405	2019-04-05	60512200	Lianghe	237.29	0.370
20190406	2019-04-06	60512200	Lianghe	237.27	0.284
20190407	2019-04-07	60512200	Lianghe	237.25	0.215
20190409	2019-04-09	60512200	Lianghe	237.47	1.71
20190410	2019-04-10	60512200	Lianghe	237.23	0.187
20190411	2019-04-11	60512200	Lianghe	237.21	0.140
20190412	2019-04-12	60512200	Lianghe	237.20	0.119
20190413	2019-04-13	60512200	Lianghe	237.19	0.100
20190414	2019-04-14	60512200	Lianghe	237.30	0.420
20190415	2019-04-15	60512200	Lianghe	237.61	2.49
20190416	2019-04-16	60512200	Lianghe	237.59	2.28
20190417	2019-04-17	60512200	Lianghe	237.49	1.85
20190418	2019-04-18	60512200	Lianghe	237.30	0.420
20190419	2019-04-19	60512200	Lianghe	237.27	0.284
20190420	2019-04-20	60512200	Lianghe	237.32	0.533
20190421	2019-04-21	60512200	Lianghe	237.67	3.33
20190422	2019-04-22	60512200	Lianghe	237.60	2.38
20190423	2019-04-23	60512200	Lianghe	237.33	0.596
20190424	2019-04-24	60512200	Lianghe	237.30	0.420
20190425	2019-04-25	60512200	Lianghe	237.28	0.325
20190426	2019-04-26	60512200	Lianghe	237.50	1.91
20190427	2019-04-27	60512200	Lianghe	237.27	0.284
20190428	2019-04-28	60512200	Lianghe	237.22	0.163
20190429	2019-04-29	60512200	Lianghe	237.22	0.163
20190430	2019-04-30	60512200	Lianghe	237.24	0.214
20190501	2019-05-01	60512200	Lianghe	237.23	0.187
20190502	2019-05-02	60512200	Lianghe	237.46	1.64
20190503	2019-05-03	60512200	Lianghe	237.23	0.187
20190504	2019-05-04	60512200	Lianghe	237.21	0.140
20190505	2019-05-05	60512200	Lianghe	237.22	0.163
20190506	2019-05-06	60512200	Lianghe	237.25	0.215
20190507	2019-05-07	60512200	Lianghe	237.28	0.325
20190508	2019-05-08	60512200	Lianghe	237.32	0.533
20190509	2019-05-09	60512200	Lianghe	237.49	1.85
20190510	2019-05-10	60512200	Lianghe	237.27	0.285
20190511	2019-05-11	60512200	Lianghe	237.23	0.187
20190512	2019-05-12	60512200	Lianghe	237.26	0.247
20190513	2019-05-13	60512200	Lianghe	237.74	5.26
20190514	2019-05-14	60512200	Lianghe	237.73	4.93
20190515	2019-05-15	60512200	Lianghe	237.67	3.33
20190516	2019-05-16	60512200	Lianghe	237.58	2.19
20190517	2019-05-17	60512200	Lianghe	237.54	2.13
20190518	2019-05-18	60512200	Lianghe	237.51	1.97
20190519	2019-05-19	60512200	Lianghe	237.41	1.23
20190520	2019-05-20	60512200	Lianghe	238.10	24.6
20190521	2019-05-21	60512200	Lianghe	237.84	9.46
20190522	2019-05-22	60512200	Lianghe	237.69	3.78
20190523	2019-05-23	60512200	Lianghe	237.61	2.49
20190524	2019-05-24	60512200	Lianghe	237.55	2.00
20190525	2019-05-25	60512200	Lianghe	237.55
20190526	2019-05-26	60512200	Lianghe	237.34	0.663
20190527	2019-05-27	60512200	Lianghe	237.48	1.78
20190528	2019-05-28	60512200	Lianghe	237.35	0.789
20190529	2019-05-29	60512200	Lianghe	237.31	0.474
20190530	2019-05-30	60512200	Lianghe	237.53	2.08
20190531	2019-05-31	60512200	Lianghe	237.53
20190601	2019-06-01	60512200	Lianghe	237.30	0.420
20190602	2019-06-02	60512200	Lianghe	237.51
20190603	2019-06-03	60512200	Lianghe	237.46	1.64
20190604	2019-06-04	60512200	Lianghe	237.26
20190605	2019-06-05	60512200	Lianghe	237.28	0.325
20190606	2019-06-06	60512200	Lianghe	237.60	2.38
20190607	2019-06-07	60512200	Lianghe	237.50	1.51
20190608	2019-06-08	60512200	Lianghe	237.31	0.474
20190609	2019-06-09	60512200	Lianghe	237.71	4.32
20190610	2019-06-10	60512200	Lianghe	237.83	9.00
20190611	2019-06-11	60512200	Lianghe	237.74	5.26
20190612	2019-06-12	60512200	Lianghe	238.07	22.5
20190613	2019-06-13	60512200	Lianghe	237.80	7.70
20190614	2019-06-14	60512200	Lianghe	237.68	3.55
20190615	2019-06-15	60512200	Lianghe	237.63	2.75
20190616	2019-06-16	60512200	Lianghe	237.98	16.9
20190617	2019-06-17	60512200	Lianghe	237.90	12.4
20190618	2019-06-18	60512200	Lianghe	237.90	12.4
20190619	2019-06-19	60512200	Lianghe	237.78	6.88
20190620	2019-06-20	60512200	Lianghe	237.69	3.78
20190621	2019-06-21	60512200	Lianghe	237.64	2.90
20190622	2019-06-22	60512200	Lianghe	237.62	2.62
20190623	2019-06-23	60512200	Lianghe	237.93	14.0
20190624	2019-06-24	60512200	Lianghe	237.74	5.26
20190625	2019-06-25	60512200	Lianghe	237.67	3.33
20190626	2019-06-26	60512200	Lianghe	237.71	4.32
20190627	2019-06-27	60512200	Lianghe	237.65	2.96
20190628	2019-06-28	60512200	Lianghe	237.64	2.90
20190629	2019-06-29	60512200	Lianghe	237.79	7.29
20190630	2019-06-30	60512200	Lianghe	237.75	5.74
20190701	2019-07-01	60512200	Lianghe	237.68	3.55
20190702	2019-07-02	60512200	Lianghe	237.64	2.90
20190703	2019-07-03	60512200	Lianghe	237.60	2.38
20190704	2019-07-04	60512200	Lianghe	237.62	2.62
20190705	2019-07-05	60512200	Lianghe	237.69	3.78
20190706	2019-07-06	60512200	Lianghe	237.63	2.62
20190707	2019-07-07	60512200	Lianghe	237.61	2.49
20190708	2019-07-08	60512200	Lianghe	237.55	2.00
20190709	2019-07-09	60512200	Lianghe	237.73	4.93
20190710	2019-07-10	60512200	Lianghe	237.68	3.55
20190711	2019-07-11	60512200	Lianghe	237.61	2.49
20190712	2019-07-12	60512200	Lianghe	237.62	2.62
20190713	2019-07-13	60512200	Lianghe	237.62	2.62
20190714	2019-07-14	60512200	Lianghe	237.57	2.11
20190715	2019-07-15	60512200	Lianghe	237.52	2.03
20190716	2019-07-16	60512200	Lianghe	237.49	1.85
20190717	2019-07-17	60512200	Lianghe	237.31	0.474
20190718	2019-07-18	60512200	Lianghe	237.30	0.420
20190719	2019-07-19	60512200	Lianghe	237.56	2.05
20190720	2019-07-20	60512200	Lianghe	237.91	12.9
20190721	2019-07-21	60512200	Lianghe	237.69	3.78
20190722	2019-07-22	60512200	Lianghe	237.63	2.75
20190723	2019-07-23	60512200	Lianghe	237.78	6.88
20190724	2019-07-24	60512200	Lianghe	237.86	10.4
20190725	2019-07-25	60512200	Lianghe	237.92	13.5
20190726	2019-07-26	60512200	Lianghe	237.73	4.93
20190727	2019-07-27	60512200	Lianghe	237.64	2.90
20190728	2019-07-28	60512200	Lianghe	237.58	2.19
20190729	2019-07-29	60512200	Lianghe	237.54	2.13
20190730	2019-07-30	60512200	Lianghe	237.33	0.596
20190731	2019-07-31	60512200	Lianghe	237.34	0.663
20190801	2019-08-01	60512200	Lianghe	237.66	3.14
20190802	2019-08-02	60512200	Lianghe	237.59	2.28
20190803	2019-08-03	60512200	Lianghe	237.54	2.13
20190804	2019-08-04	60512200	Lianghe	237.49	1.85
20190805	2019-08-05	60512200	Lianghe	237.51	1.97
20190806	2019-08-06	60512200	Lianghe	237.51	1.97
20190807	2019-08-07	60512200	Lianghe	239.43	51.1
20190808	2019-08-08	60512200	Lianghe	237.90	12.4
20190809	2019-08-09	60512200	Lianghe	237.74	5.26
20190810	2019-08-10	60512200	Lianghe	238.11	25.3
20190811	2019-08-11	60512200	Lianghe	237.77	6.49
20190812	2019-08-12	60512200	Lianghe	237.69	1.66
20190813	2019-08-13	60512200	Lianghe	237.68	3.55
20190814	2019-08-14	60512200	Lianghe	237.66	3.14
20190815	2019-08-15	60512200	Lianghe	237.52	2.03
20190816	2019-08-16	60512200	Lianghe	237.32	0.533
20190817	2019-08-17	60512200	Lianghe	237.30	0.420
20190818	2019-08-18	60512200	Lianghe	237.53	2.13
20190819	2019-08-19	60512200	Lianghe	237.25	0.215
20190820	2019-08-20	60512200	Lianghe	237.26	0.247
20190821	2019-08-21	60512200	Lianghe	237.25	0.215
20190822	2019-08-22	60512200	Lianghe	237.24	0.214
20190823	2019-08-23	60512200	Lianghe	237.23	0.187
20190824	2019-08-24	60512200	Lianghe	237.23	0.187
20190825	2019-08-25	60512200	Lianghe	237.21	0.140
20190826	2019-08-26	60512200	Lianghe	237.22	0.163
20190827	2019-08-27	60512200	Lianghe	237.20	0.119
20190828	2019-08-28	60512200	Lianghe	237.42	1.31
20190829	2019-08-29	60512200	Lianghe	237.28	0.325
20190830	2019-08-30	60512200	Lianghe	237.43	1.38
20190831	2019-08-31	60512200	Lianghe	237.25	0.215
20190901	2019-09-01	60512200	Lianghe	237.48	1.78
20190902	2019-09-02	60512200	Lianghe	237.42	1.31
20190903	2019-09-03	60512200	Lianghe	237.22	0.140
20190904	2019-09-04	60512200	Lianghe	237.20	0.119
20190905	2019-09-05	60512200	Lianghe	237.43	1.38
20190906	2019-09-06	60512200	Lianghe	237.22	0.163
20190907	2019-09-07	60512200	Lianghe	237.18	0.0840
20190908	2019-09-08	60512200	Lianghe	237.26	0.247
20190909	2019-09-09	60512200	Lianghe	237.62	2.62
20190910	2019-09-10	60512200	Lianghe	237.49	1.85
20190911	2019-09-11	60512200	Lianghe	237.49	1.85
20190912	2019-09-12	60512200	Lianghe	237.31	0.474
20190913	2019-09-13	60512200	Lianghe	237.20	0.119
20190914	2019-09-14	60512200	Lianghe	237.19	0.100
20190915	2019-09-15	60512200	Lianghe	237.18	0.0840
20190916	2019-09-16	60512200	Lianghe	237.44	1.46
20190917	2019-09-17	60512200	Lianghe	237.19	0.100
20190918	2019-09-18	60512200	Lianghe	237.22	0.163
20190919	2019-09-19	60512200	Lianghe	237.27	0.284
20190920	2019-09-20	60512200	Lianghe	237.25	0.215
20190921	2019-09-21	60512200	Lianghe	237.58	2.19
20190922	2019-09-22	60512200	Lianghe	237.26	0.247
20190923	2019-09-23	60512200	Lianghe	237.23	0.187
20190924	2019-09-24	60512200	Lianghe	237.21	0.140
20190925	2019-09-25	60512200	Lianghe	237.20	0.119
20190926	2019-09-26	60512200	Lianghe	237.20	0.119
20190927	2019-09-27	60512200	Lianghe	237.41	1.23
20190928	2019-09-28	60512200	Lianghe	237.18	0.0840
20190929	2019-09-29	60512200	Lianghe	237.34	0.663
20190930	2019-09-30	60512200	Lianghe	237.34	0.663
20191001	2019-10-01	60512200	Lianghe	237.36	0.863
20191002	2019-10-02	60512200	Lianghe	237.17	0.0690
20191003	2019-10-03	60512200	Lianghe	237.15	0.0460
20191004	2019-10-04	60512200	Lianghe	237.30	0.420
20191005	2019-10-05	60512200	Lianghe	237.43	1.38
20191006	2019-10-06	60512200	Lianghe	237.20	0.119
20191007	2019-10-07	60512200	Lianghe	237.18	0.0840
20191008	2019-10-08	60512200	Lianghe	237.22	0.163
20191009	2019-10-09	60512200	Lianghe	237.40	1.16
20191010	2019-10-10	60512200	Lianghe	237.36	0.863
20191011	2019-10-11	60512200	Lianghe	237.23	0.187
20191012	2019-10-12	60512200	Lianghe	237.30	0.420
20191013	2019-10-13	60512200	Lianghe	237.24	0.214
20191014	2019-10-14	60512200	Lianghe	237.24	0.214
20191015	2019-10-15	60512200	Lianghe	237.26	0.247
20191016	2019-10-16	60512200	Lianghe	237.53	2.08
20191017	2019-10-17	60512200	Lianghe	237.69	3.78
20191018	2019-10-18	60512200	Lianghe	237.67	3.33
20191019	2019-10-19	60512200	Lianghe	237.64	2.90
20191020	2019-10-20	60512200	Lianghe	237.42	1.31
20191021	2019-10-21	60512200	Lianghe	237.46	1.64
20191022	2019-10-22	60512200	Lianghe	237.57	2.11
20191023	2019-10-23	60512200	Lianghe	237.90	12.4
20191024	2019-10-24	60512200	Lianghe	237.78	6.88
20191025	2019-10-25	60512200	Lianghe	237.74	5.26
20191026	2019-10-26	60512200	Lianghe	237.85	9.92
20191027	2019-10-27	60512200	Lianghe	237.89	11.9
20191028	2019-10-28	60512200	Lianghe	237.83	9.00
20191029	2019-10-29	60512200	Lianghe	237.75	5.74
20191030	2019-10-30	60512200	Lianghe	237.72	4.61
20191031	2019-10-31	60512200	Lianghe	237.70	4.04
20191101	2019-11-01	60512200	Lianghe	237.50	1.91
20191102	2019-11-02	60512200	Lianghe	237.44	1.46
20191103	2019-11-03	60512200	Lianghe	237.43	1.38
20191104	2019-11-04	60512200	Lianghe	237.63	2.75
20191105	2019-11-05	60512200	Lianghe	237.37	0.937
20191106	2019-11-06	60512200	Lianghe	237.37	0.937
20191107	2019-11-07	60512200	Lianghe	237.40	1.16
20191108	2019-11-08	60512200	Lianghe	237.39	1.09
20191109	2019-11-09	60512200	Lianghe	237.46	1.64
20191110	2019-11-10	60512200	Lianghe	237.22	0.163
20191111	2019-11-11	60512200	Lianghe	237.23	0.187
20191112	2019-11-12	60512200	Lianghe	237.58	2.19
20191113	2019-11-13	60512200	Lianghe	237.38	1.01
20191114	2019-11-14	60512200	Lianghe	237.37	0.937
20191115	2019-11-15	60512200	Lianghe	237.38	1.01
20191116	2019-11-16	60512200	Lianghe	237.38	1.01
20191117	2019-11-17	60512200	Lianghe	237.37	0.937
20191118	2019-11-18	60512200	Lianghe	237.40	1.16
20191119	2019-11-19	60512200	Lianghe	237.61	2.49
20191120	2019-11-20	60512200	Lianghe	237.38	1.01
20191121	2019-11-21	60512200	Lianghe	237.33	0.596
20191122	2019-11-22	60512200	Lianghe	237.32	0.533
20191123	2019-11-23	60512200	Lianghe	237.33	0.596
20191125	2019-11-25	60512200	Lianghe	238.00	18.1
20191126	2019-11-26	60512200	Lianghe	237.85	9.92
20191127	2019-11-27	60512200	Lianghe	237.77	6.49
20191128	2019-11-28	60512200	Lianghe	237.73	4.93
20191129	2019-11-29	60512200	Lianghe	237.68	3.55
20191130	2019-11-30	60512200	Lianghe	237.68	3.55
20191201	2019-12-01	60512200	Lianghe	237.65	2.96
20191202	2019-12-02	60512200	Lianghe	237.59	2.28
20191203	2019-12-03	60512200	Lianghe	237.44	1.46
20191204	2019-12-04	60512200	Lianghe	237.44	1.46
20191205	2019-12-05	60512200	Lianghe	237.67	3.33
20191206	2019-12-06	60512200	Lianghe	237.25	0.215
20191207	2019-12-07	60512200	Lianghe	237.53	2.08
20191208	2019-12-08	60512200	Lianghe	237.44	1.46
20191209	2019-12-09	60512200	Lianghe	237.54	2.13
20191210	2019-12-10	60512200	Lianghe	237.84	9.46
20191211	2019-12-11	60512200	Lianghe	237.23	0.187
20191212	2019-12-12	60512200	Lianghe	237.51	1.97
20191213	2019-12-13	60512200	Lianghe	237.53	2.08
20191214	2019-12-14	60512200	Lianghe	237.21	0.140
20191215	2019-12-15	60512200	Lianghe	237.21	0.140
20191216	2019-12-16	60512200	Lianghe	237.22	0.163
20191217	2019-12-17	60512200	Lianghe	237.43	1.38
20191218	2019-12-18	60512200	Lianghe	237.23	0.187
20191219	2019-12-19	60512200	Lianghe	237.27	0.284
20191220	2019-12-20	60512200	Lianghe	237.28	0.325
20191221	2019-12-21	60512200	Lianghe	237.28	0.325
20191222	2019-12-22	60512200	Lianghe	237.47	1.71
20191223	2019-12-23	60512200	Lianghe	237.27	0.284
20191224	2019-12-24	60512200	Lianghe	237.25	0.215
20191225	2019-12-25	60512200	Lianghe	237.26	0.247
20191226	2019-12-26	60512200	Lianghe	237.25	0.215
20191227	2019-12-27	60512200	Lianghe	237.24	0.214
20191228	2019-12-28	60512200	Lianghe	237.23	0.187
20191229	2019-12-29	60512200	Lianghe	237.46	1.64
20191230	2019-12-30	60512200	Lianghe	237.22	0.163
20191231	2019-12-31	60512200	Lianghe	237.21	0.140
20200101	2020-01-01	60512200	Lianghe	237.21	0.140
20200102	2020-01-02	60512200	Lianghe	237.22	0.163
20200103	2020-01-03	60512200	Lianghe	237.39	1.09
20200104	2020-01-04	60512200	Lianghe	237.22	0.163
20200105	2020-01-05	60512200	Lianghe	237.20	0.119
20200106	2020-01-06	60512200	Lianghe	237.23	0.187
20200107	2020-01-07	60512200	Lianghe	237.63	2.75
20200108	2020-01-08	60512200	Lianghe	237.55	2.00
20200109	2020-01-09	60512200	Lianghe	237.56	2.05
20200110	2020-01-10	60512200	Lianghe	237.35	0.789
20200111	2020-01-11	60512200	Lianghe	237.44	1.46
20200112	2020-01-12	60512200	Lianghe	237.30	0.420
20200113	2020-01-13	60512200	Lianghe	237.30	0.420
20200114	2020-01-14	60512200	Lianghe	237.29	0.370
20200115	2020-01-15	60512200	Lianghe	237.28	0.325
20200116	2020-01-16	60512200	Lianghe	237.47	1.71
20200117	2020-01-17	60512200	Lianghe	237.25	0.215
20200118	2020-01-18	60512200	Lianghe	237.44	1.46
20200119	2020-01-19	60512200	Lianghe	237.23	0.187
20200120	2020-01-20	60512200	Lianghe	237.21	0.140
20200121	2020-01-21	60512200	Lianghe	237.23	0.187
20200122	2020-01-22	60512200	Lianghe	237.23	0.187
20200123	2020-01-23	60512200	Lianghe	237.48	1.78
20200124	2020-01-24	60512200	Lianghe	237.24	0.214
20200125	2020-01-25	60512200	Lianghe	237.30	0.420
20200126	2020-01-26	60512200	Lianghe	237.23	0.187
20200127	2020-01-27	60512200	Lianghe	237.25	0.215
20200128	2020-01-28	60512200	Lianghe	237.24	0.214
20200129	2020-01-29	60512200	Lianghe	237.23	0.187
20200130	2020-01-30	60512200	Lianghe	237.23	0.187
20200131	2020-01-31	60512200	Lianghe	237.22	0.163
20200201	2020-02-01	60512200	Lianghe	237.45	1.57
20200202	2020-02-02	60512200	Lianghe	237.44	1.46
20200203	2020-02-03	60512200	Lianghe	237.23	0.187
20200204	2020-02-04	60512200	Lianghe	237.23	0.187
20200205	2020-02-05	60512200	Lianghe	237.23	0.187
20200206	2020-02-06	60512200	Lianghe	237.22	0.163
20200207	2020-02-07	60512200	Lianghe	237.25	0.215
20200208	2020-02-08	60512200	Lianghe	237.26	0.247
20200209	2020-02-09	60512200	Lianghe	237.47	1.71
20200210	2020-02-10	60512200	Lianghe	237.42	1.31
20200211	2020-02-11	60512200	Lianghe	237.24	0.214
20200212	2020-02-12	60512200	Lianghe	237.23	0.187
20200213	2020-02-13	60512200	Lianghe	237.23	0.187
20200214	2020-02-14	60512200	Lianghe	237.24	0.214
20200215	2020-02-15	60512200	Lianghe	237.47	1.71
20200216	2020-02-16	60512200	Lianghe	237.67	3.33
20200217	2020-02-17	60512200	Lianghe	237.60	2.38
20200218	2020-02-18	60512200	Lianghe	237.50	1.91
20200219	2020-02-19	60512200	Lianghe	237.51	1.97
20200220	2020-02-20	60512200	Lianghe	237.46	1.64
20200221	2020-02-21	60512200	Lianghe	237.28	0.325
20200222	2020-02-22	60512200	Lianghe	237.28	0.325
20200223	2020-02-23	60512200	Lianghe	237.47	1.71
20200224	2020-02-24	60512200	Lianghe	237.29	0.370
20200225	2020-02-25	60512200	Lianghe	237.29	0.370
20200226	2020-02-26	60512200	Lianghe	237.25	0.215
20200227	2020-02-27	60512200	Lianghe	237.24	0.214
20200228	2020-02-28	60512200	Lianghe	237.27	0.284
20200229	2020-02-29	60512200	Lianghe	237.47	1.71
20200301	2020-03-01	60512200	Lianghe	237.30	0.420
20200302	2020-03-02	60512200	Lianghe	237.31	0.474
20200303	2020-03-03	60512200	Lianghe	237.64	2.90
20200304	2020-03-04	60512200	Lianghe	237.60	2.38
20200305	2020-03-05	60512200	Lianghe	237.56	2.05
20200306	2020-03-06	60512200	Lianghe	237.55	2.00
20200307	2020-03-07	60512200	Lianghe	237.49	1.85
20200308	2020-03-08	60512200	Lianghe	237.42	1.31
20200309	2020-03-09	60512200	Lianghe	237.30	0.420
20200310	2020-03-10	60512200	Lianghe	237.31	0.474
20200311	2020-03-11	60512200	Lianghe	237.49	1.85
20200312	2020-03-12	60512200	Lianghe	237.47	1.71
20200313	2020-03-13	60512200	Lianghe	237.43	1.38
20200314	2020-03-14	60512200	Lianghe	237.27	0.284
20200315	2020-03-15	60512200	Lianghe	237.26	0.247
20200316	2020-03-16	60512200	Lianghe	237.26	0.247
20200317	2020-03-17	60512200	Lianghe	237.24	0.214
20200318	2020-03-18	60512200	Lianghe	237.45	1.57
20200319	2020-03-19	60512200	Lianghe	237.24	0.214
20200320	2020-03-20	60512200	Lianghe	237.24	0.214
20200321	2020-03-21	60512200	Lianghe	237.22	0.163
20200322	2020-03-22	60512200	Lianghe	237.25	0.215
20200323	2020-03-23	60512200	Lianghe	237.23	0.187
20200324	2020-03-24	60512200	Lianghe	237.22	0.163
20200325	2020-03-25	60512200	Lianghe	237.35	0.789
20200326	2020-03-26	60512200	Lianghe	237.22	0.163
20200327	2020-03-27	60512200	Lianghe	237.28	0.325
20200328	2020-03-28	60512200	Lianghe	238.06	21.8
20200329	2020-03-29	60512200	Lianghe	237.80	7.70
20200330	2020-03-30	60512200	Lianghe	237.71	4.32
20200331	2020-03-31	60512200	Lianghe	237.64	2.90
20200401	2020-04-01	60512200	Lianghe	237.59	2.28
20200402	2020-04-02	60512200	Lianghe	237.57	2.11
20200403	2020-04-03	60512200	Lianghe	237.56	2.05
20200404	2020-04-04	60512200	Lianghe	237.49	1.85
20200405	2020-04-05	60512200	Lianghe	237.33	0.596
20200406	2020-04-06	60512200	Lianghe	237.31	0.474
20200407	2020-04-07	60512200	Lianghe	237.50	1.91
20200408	2020-04-08	60512200	Lianghe	237.28	0.325
20200409	2020-04-09	60512200	Lianghe	237.29	0.370
20200410	2020-04-10	60512200	Lianghe	237.50	1.91
20200411	2020-04-11	60512200	Lianghe	237.65	3.36
20200412	2020-04-12	60512200	Lianghe	237.66	3.14
20200413	2020-04-13	60512200	Lianghe	237.61	2.49
20200414	2020-04-14	60512200	Lianghe	237.58	2.19
20200415	2020-04-15	60512200	Lianghe	237.49	1.85
20200416	2020-04-16	60512200	Lianghe	237.28	0.325
20200417	2020-04-17	60512200	Lianghe	237.26	0.247
20200418	2020-04-18	60512200	Lianghe	238.18	30.8
20200419	2020-04-19	60512200	Lianghe	237.87	10.9
20200420	2020-04-20	60512200	Lianghe	237.80	7.70
20200421	2020-04-21	60512200	Lianghe	237.83	9.00
20200422	2020-04-22	60512200	Lianghe	237.77	6.49
20200423	2020-04-23	60512200	Lianghe	237.71	4.32
20200424	2020-04-24	60512200	Lianghe	237.68	3.55
20200425	2020-04-25	60512200	Lianghe	237.63	2.75
20200426	2020-04-26	60512200	Lianghe	237.58	2.19
20200427	2020-04-27	60512200	Lianghe	237.53	2.08
20200428	2020-04-28	60512200	Lianghe	237.51	1.91
20200429	2020-04-29	60512200	Lianghe	237.35	0.789
20200430	2020-04-30	60512200	Lianghe	237.30	0.420
20200501	2020-05-01	60512200	Lianghe	237.31	0.474
20200502	2020-05-02	60512200	Lianghe	237.50	1.91
20200503	2020-05-03	60512200	Lianghe	237.27	0.284
20200504	2020-05-04	60512200	Lianghe	237.25	0.215
20200505	2020-05-05	60512200	Lianghe	237.42	1.31
20200506	2020-05-06	60512200	Lianghe	237.26	0.247
20200507	2020-05-07	60512200	Lianghe	237.23	0.187
20200508	2020-05-08	60512200	Lianghe	237.43	1.38
20200509	2020-05-09	60512200	Lianghe	237.77	6.49
20200510	2020-05-10	60512200	Lianghe	237.69	3.78
20200511	2020-05-11	60512200	Lianghe	237.55	2.00
20200512	2020-05-12	60512200	Lianghe	237.55	2.00
20200513	2020-05-13	60512200	Lianghe	237.53	2.08
20200514	2020-05-14	60512200	Lianghe	237.34	0.663
20200515	2020-05-15	60512200	Lianghe	237.59	2.28
20200516	2020-05-16	60512200	Lianghe	237.49	1.85
20200517	2020-05-17	60512200	Lianghe	237.44	1.46
20200518	2020-05-18	60512200	Lianghe	237.28	0.325
20200519	2020-05-19	60512200	Lianghe	237.25	0.215
20200520	2020-05-20	60512200	Lianghe	237.36	0.863
20200521	2020-05-21	60512200	Lianghe	237.56	2.05
20200522	2020-05-22	60512200	Lianghe	237.70	4.04
20200523	2020-05-23	60512200	Lianghe	237.62	2.62
20200524	2020-05-24	60512200	Lianghe	237.56	2.05
20200525	2020-05-25	60512200	Lianghe	237.74	5.26
20200526	2020-05-26	60512200	Lianghe	237.68	3.55
20200527	2020-05-27	60512200	Lianghe	237.75	5.74
20200528	2020-05-28	60512200	Lianghe	238.02	19.3
20200529	2020-05-29	60512200	Lianghe	237.76	6.11
20200530	2020-05-30	60512200	Lianghe	237.66	3.14
20200531	2020-05-31	60512200	Lianghe	237.61	2.49
20200601	2020-06-01	60512200	Lianghe	237.62	2.62
20200602	2020-06-02	60512200	Lianghe	237.60	2.38
20200603	2020-06-03	60512200	Lianghe	238.06	21.8
20200604	2020-06-04	60512200	Lianghe	237.78	6.88
20200605	2020-06-05	60512200	Lianghe	237.67	3.33
20200606	2020-06-06	60512200	Lianghe	237.61	2.49
20200607	2020-06-07	60512200	Lianghe	237.56	2.05
20200608	2020-06-08	60512200	Lianghe	237.59	2.28
20200609	2020-06-09	60512200	Lianghe	237.42	1.31
20200610	2020-06-10	60512200	Lianghe	237.61	2.49
20200611	2020-06-11	60512200	Lianghe	237.45	1.57
20200612	2020-06-12	60512200	Lianghe	238.01	18.7
20200613	2020-06-13	60512200	Lianghe	237.75	5.74
20200614	2020-06-14	60512200	Lianghe	238.22	34.0
20200615	2020-06-15	60512200	Lianghe	237.96	15.7
20200616	2020-06-16	60512200	Lianghe	237.75	5.74
20200617	2020-06-17	60512200	Lianghe	237.69	3.78
20200618	2020-06-18	60512200	Lianghe	238.15	28.5
20200619	2020-06-19	60512200	Lianghe	237.85	9.92
20200620	2020-06-20	60512200	Lianghe	237.74	4.93
20200621	2020-06-21	60512200	Lianghe	237.88	11.4
20200622	2020-06-22	60512200	Lianghe	238.84	93.7
20200623	2020-06-23	60512200	Lianghe	238.00	18.1
20200624	2020-06-24	60512200	Lianghe	237.83	9.00
20200625	2020-06-25	60512200	Lianghe	237.73	4.93
20200626	2020-06-26	60512200	Lianghe	237.68	3.55
20200627	2020-06-27	60512200	Lianghe	237.63	2.75
20200628	2020-06-28	60512200	Lianghe	237.79	7.29
20200629	2020-06-29	60512200	Lianghe	237.70	4.04
20200630	2020-06-30	60512200	Lianghe	237.66	3.14
20200701	2020-07-01	60512200	Lianghe	237.63	2.75
20200702	2020-07-02	60512200	Lianghe	239.46	172
20200703	2020-07-03	60512200	Lianghe	237.98	16.9
20200704	2020-07-04	60512200	Lianghe	237.78	6.88
20200705	2020-07-05	60512200	Lianghe	237.83	9.00
20200706	2020-07-06	60512200	Lianghe	237.76	6.11
20200707	2020-07-07	60512200	Lianghe	237.72	4.61
20200708	2020-07-08	60512200	Lianghe	237.69	3.78
20200709	2020-07-09	60512200	Lianghe	237.67	3.33
20200710	2020-07-10	60512200	Lianghe	237.64	2.90
20200711	2020-07-11	60512200	Lianghe	237.66	3.14
20200712	2020-07-12	60512200	Lianghe	237.75	5.74
20200713	2020-07-13	60512200	Lianghe	238.07	22.5
20200714	2020-07-14	60512200	Lianghe	237.85	9.92
20200715	2020-07-15	60512200	Lianghe	237.72	4.61
20200716	2020-07-16	60512200	Lianghe	238.27	38.0
20200717	2020-07-17	60512200	Lianghe	238.55	63.3
20200718	2020-07-18	60512200	Lianghe	238.19	31.6
20200719	2020-07-19	60512200	Lianghe	237.91	12.9
20200720	2020-07-20	60512200	Lianghe	237.77	6.49
20200721	2020-07-21	60512200	Lianghe	237.71	4.32
20200722	2020-07-22	60512200	Lianghe	237.68	3.55
20200723	2020-07-23	60512200	Lianghe	237.67	3.33
20200724	2020-07-24	60512200	Lianghe	237.63	2.75
20200725	2020-07-25	60512200	Lianghe	237.61	2.49
20200726	2020-07-26	60512200	Lianghe	238.84	93.7
20200727	2020-07-27	60512200	Lianghe	238.01	18.7
20200728	2020-07-28	60512200	Lianghe	237.77	6.49
20200729	2020-07-29	60512200	Lianghe	237.69	3.78
20200730	2020-07-30	60512200	Lianghe	237.65	2.96
20200731	2020-07-31	60512200	Lianghe	237.64	2.90
20200801	2020-08-01	60512200	Lianghe	237.59	2.28
20200802	2020-08-02	60512200	Lianghe	237.66	3.14
20200803	2020-08-03	60512200	Lianghe	237.59	2.28
20200804	2020-08-04	60512200	Lianghe	237.56	2.05
20200805	2020-08-05	60512200	Lianghe	237.46	1.64
20200806	2020-08-06	60512200	Lianghe	237.34	0.663
20200807	2020-08-07	60512200	Lianghe	237.35	0.789
20200808	2020-08-08	60512200	Lianghe	237.27	0.284
20200809	2020-08-09	60512200	Lianghe	237.28	0.325
20200810	2020-08-10	60512200	Lianghe	237.68	3.55
20200811	2020-08-11	60512200	Lianghe	237.51	1.97
20200812	2020-08-12	60512200	Lianghe	237.51	1.97
20200813	2020-08-13	60512200	Lianghe	237.47	1.71
20200814	2020-08-14	60512200	Lianghe	237.33	0.596
20200815	2020-08-15	60512200	Lianghe	237.25	0.215
20200816	2020-08-16	60512200	Lianghe	237.23	0.187
20200817	2020-08-17	60512200	Lianghe	237.43	1.38
20200818	2020-08-18	60512200	Lianghe	237.22	0.163
20200819	2020-08-19	60512200	Lianghe	237.22	0.163
20200820	2020-08-20	60512200	Lianghe	237.22	0.163
20200821	2020-08-21	60512200	Lianghe	237.50	1.91
20200822	2020-08-22	60512200	Lianghe	237.46	1.64
20200823	2020-08-23	60512200	Lianghe	237.43	1.38
20200824	2020-08-24	60512200	Lianghe	237.23	0.187
20200825	2020-08-25	60512200	Lianghe	237.24	0.214
20200826	2020-08-26	60512200	Lianghe	237.29	0.370
20200827	2020-08-27	60512200	Lianghe	237.20	0.119
20200828	2020-08-28	60512200	Lianghe	237.20	0.119
20200829	2020-08-29	60512200	Lianghe	237.20	0.119
20200830	2020-08-30	60512200	Lianghe	237.19	0.100
20200831	2020-08-31	60512200	Lianghe	237.18	0.0840
20200901	2020-09-01	60512200	Lianghe	237.18	0.0840
20200902	2020-09-02	60512200	Lianghe	237.32	0.533
20200903	2020-09-03	60512200	Lianghe	237.20	0.119
20200904	2020-09-04	60512200	Lianghe	237.19	0.100
20200905	2020-09-05	60512200	Lianghe	237.18	0.0840
20200906	2020-09-06	60512200	Lianghe	237.19	0.100
20200907	2020-09-07	60512200	Lianghe	237.18	0.0840
20200908	2020-09-08	60512200	Lianghe	237.18	0.0840
20200909	2020-09-09	60512200	Lianghe	237.26	0.247
20200910	2020-09-10	60512200	Lianghe	237.18	0.0840
20200911	2020-09-11	60512200	Lianghe	237.18	0.0840
20200912	2020-09-12	60512200	Lianghe	237.17	0.0690
20200913	2020-09-13	60512200	Lianghe	237.17	0.0690
20200914	2020-09-14	60512200	Lianghe	237.28	0.325
20200915	2020-09-15	60512200	Lianghe	237.25	0.215
20200916	2020-09-16	60512200	Lianghe	237.44	1.46
20200917	2020-09-17	60512200	Lianghe	237.55	2.00
20200918	2020-09-18	60512200	Lianghe	237.50	1.91
20200919	2020-09-19	60512200	Lianghe	237.27	0.284
20200920	2020-09-20	60512200	Lianghe	237.25	0.215
20200921	2020-09-21	60512200	Lianghe	237.40	1.16
20200922	2020-09-22	60512200	Lianghe	237.24	0.214
20200923	2020-09-23	60512200	Lianghe	237.61	2.49
20200924	2020-09-24	60512200	Lianghe	237.52	2.03
20200925	2020-09-25	60512200	Lianghe	237.50	1.91
20200926	2020-09-26	60512200	Lianghe	237.64	2.90
20200927	2020-09-27	60512200	Lianghe	237.58	2.19
20200928	2020-09-28	60512200	Lianghe	237.48	1.78
20200929	2020-09-29	60512200	Lianghe	237.48	1.78
20200930	2020-09-30	60512200	Lianghe	237.40	1.16
20201001	2020-10-01	60512200	Lianghe	237.25	0.215
20201002	2020-10-02	60512200	Lianghe	237.25	0.215
20201003	2020-10-03	60512200	Lianghe	237.83	9.00
20201004	2020-10-04	60512200	Lianghe	238.06	21.8
20201005	2020-10-05	60512200	Lianghe	237.97	16.3
20201006	2020-10-06	60512200	Lianghe	237.91	12.9
20201007	2020-10-07	60512200	Lianghe	237.78	6.88
20201008	2020-10-08	60512200	Lianghe	237.68	3.55
20201009	2020-10-09	60512200	Lianghe	237.62	2.62
20201010	2020-10-10	60512200	Lianghe	237.58	2.19
20201011	2020-10-11	60512200	Lianghe	237.57	2.11
20201012	2020-10-12	60512200	Lianghe	237.55	2.00
20201013	2020-10-13	60512200	Lianghe	237.53	2.08
20201014	2020-10-14	60512200	Lianghe	237.30	0.420
20201015	2020-10-15	60512200	Lianghe	237.61	2.49
20201016	2020-10-16	60512200	Lianghe	238.07	22.5
20201017	2020-10-17	60512200	Lianghe	237.89	11.9
20201018	2020-10-18	60512200	Lianghe	237.79	7.29
20201019	2020-10-19	60512200	Lianghe	237.69	3.78
20201020	2020-10-20	60512200	Lianghe	237.66	3.14
20201021	2020-10-21	60512200	Lianghe	237.63	2.75
20201022	2020-10-22	60512200	Lianghe	237.61	2.49
20201023	2020-10-23	60512200	Lianghe	237.63	2.75
20201024	2020-10-24	60512200	Lianghe	237.62	2.62
20201025	2020-10-25	60512200	Lianghe	237.56	2.05
20201026	2020-10-26	60512200	Lianghe	237.42	1.31
20201027	2020-10-27	60512200	Lianghe	237.50	1.91
20201028	2020-10-28	60512200	Lianghe	237.35	0.789
20201029	2020-10-29	60512200	Lianghe	237.36	0.863
20201030	2020-10-30	60512200	Lianghe	237.57	2.11
20201031	2020-10-31	60512200	Lianghe	237.54	2.13
20201101	2020-11-01	60512200	Lianghe	237.39	1.09
20201102	2020-11-02	60512200	Lianghe	237.81	8.12
20201103	2020-11-03	60512200	Lianghe	237.74	5.26
20201104	2020-11-04	60512200	Lianghe	237.69	3.78
20201105	2020-11-05	60512200	Lianghe	237.66	3.14
20201106	2020-11-06	60512200	Lianghe	237.63	2.75
20201107	2020-11-07	60512200	Lianghe	237.59	2.28
20201108	2020-11-08	60512200	Lianghe	237.37	0.937
20201109	2020-11-09	60512200	Lianghe	237.35	0.789
20201110	2020-11-10	60512200	Lianghe	237.34	0.663
20201111	2020-11-11	60512200	Lianghe	237.48	1.78
20201112	2020-11-12	60512200	Lianghe	237.34	0.663
20201113	2020-11-13	60512200	Lianghe	237.32	0.533
20201114	2020-11-14	60512200	Lianghe	237.54	2.13
20201115	2020-11-15	60512200	Lianghe	237.33	0.596
20201116	2020-11-16	60512200	Lianghe	237.32	0.533
20201117	2020-11-17	60512200	Lianghe	237.52	2.03
20201118	2020-11-18	60512200	Lianghe	237.31	0.474
20201119	2020-11-19	60512200	Lianghe	237.31	0.474
20201120	2020-11-20	60512200	Lianghe	237.30	0.420
20201121	2020-11-21	60512200	Lianghe	237.22	0.163
20201122	2020-11-22	60512200	Lianghe	237.54	2.13
20201123	2020-11-23	60512200	Lianghe	237.31	0.474
20201124	2020-11-24	60512200	Lianghe	237.35	0.789
20201125	2020-11-25	60512200	Lianghe	237.32	0.533
20201126	2020-11-26	60512200	Lianghe	237.32	0.533
20201127	2020-11-27	60512200	Lianghe	237.55	2.00
20201128	2020-11-28	60512200	Lianghe	237.33	0.596
20201129	2020-11-29	60512200	Lianghe	237.32	0.533
20201130	2020-11-30	60512200	Lianghe	237.30	0.420
20201201	2020-12-01	60512200	Lianghe	237.22	0.163
20201202	2020-12-02	60512200	Lianghe	237.28	0.325
20201203	2020-12-03	60512200	Lianghe	237.51	1.97
20201204	2020-12-04	60512200	Lianghe	237.28	0.325
20201205	2020-12-05	60512200	Lianghe	237.28	0.325
20201206	2020-12-06	60512200	Lianghe	237.27	0.284
20201207	2020-12-07	60512200	Lianghe	237.26	0.247
20201208	2020-12-08	60512200	Lianghe	237.50	1.91
20201209	2020-12-09	60512200	Lianghe	237.29	0.370
20201210	2020-12-10	60512200	Lianghe	237.29	0.370
20201211	2020-12-11	60512200	Lianghe	237.22	0.163
20201212	2020-12-12	60512200	Lianghe	237.28	0.325
20201213	2020-12-13	60512200	Lianghe	237.28	0.325
20201214	2020-12-14	60512200	Lianghe	237.29	0.370
20201215	2020-12-15	60512200	Lianghe	237.50	1.91
20201216	2020-12-16	60512200	Lianghe	237.28	0.325
20201217	2020-12-17	60512200	Lianghe	237.27	0.284
20201218	2020-12-18	60512200	Lianghe	237.27	0.284
20201219	2020-12-19	60512200	Lianghe	237.26	0.247
20201220	2020-12-20	60512200	Lianghe	237.25	0.215
20201221	2020-12-21	60512200	Lianghe	237.19	0.100
20201222	2020-12-22	60512200	Lianghe	237.50	1.91
20201223	2020-12-23	60512200	Lianghe	237.27	0.284
20201224	2020-12-24	60512200	Lianghe	237.24	0.214
20201225	2020-12-25	60512200	Lianghe	237.19	0.100
20201226	2020-12-26	60512200	Lianghe	237.25	0.215
20201227	2020-12-27	60512200	Lianghe	237.25	0.215
20201228	2020-12-28	60512200	Lianghe	237.25	0.215
20201229	2020-12-29	60512200	Lianghe	237.51	1.97
20201230	2020-12-30	60512200	Lianghe	237.30	0.420
20201231	2020-12-31	60512200	Lianghe	237.30	0.420
20210101	2021-01-01	60512200	Lianghe	237.29	0.370
20210102	2021-01-02	60512200	Lianghe	237.28	0.325
20210103	2021-01-03	60512200	Lianghe	237.51	1.97
20210104	2021-01-04	60512200	Lianghe	237.40	1.16
20210105	2021-01-05	60512200	Lianghe	237.28	0.325
20210106	2021-01-06	60512200	Lianghe	237.31	0.474
20210107	2021-01-07	60512200	Lianghe	237.30	0.420
20210108	2021-01-08	60512200	Lianghe	237.28	0.325
20210109	2021-01-09	60512200	Lianghe	237.29	0.370
20210110	2021-01-10	60512200	Lianghe	237.53	2.08
20210111	2021-01-11	60512200	Lianghe	237.24	0.214
20210112	2021-01-12	60512200	Lianghe	237.27	0.284
20210113	2021-01-13	60512200	Lianghe	237.26	0.247
20210114	2021-01-14	60512200	Lianghe	237.26	0.247
20210115	2021-01-15	60512200	Lianghe	237.49	1.85
20210116	2021-01-16	60512200	Lianghe	237.28	0.325
20210117	2021-01-17	60512200	Lianghe	237.25	0.215
20210118	2021-01-18	60512200	Lianghe	237.25	0.215
20210119	2021-01-19	60512200	Lianghe	237.26	0.247
20210120	2021-01-20	60512200	Lianghe	237.23	0.187
20210121	2021-01-21	60512200	Lianghe	237.25	0.215
20210122	2021-01-22	60512200	Lianghe	237.26	0.247
20210123	2021-01-23	60512200	Lianghe	237.25	0.215
20210124	2021-01-24	60512200	Lianghe	237.25	0.215
20210125	2021-01-25	60512200	Lianghe	237.27	0.284
20210126	2021-01-26	60512200	Lianghe	237.54	2.13
20210127	2021-01-27	60512200	Lianghe	237.31	0.474
20210128	2021-01-28	60512200	Lianghe	237.30	0.420
20210129	2021-01-29	60512200	Lianghe	237.51	1.97
20210130	2021-01-30	60512200	Lianghe	237.28	0.325
20210131	2021-01-31	60512200	Lianghe	237.27	0.284
20210201	2021-02-01	60512200	Lianghe	237.21	0.140
20210202	2021-02-02	60512200	Lianghe	237.27	0.284
20210203	2021-02-03	60512200	Lianghe	237.50	1.91
20210204	2021-02-04	60512200	Lianghe	237.27	0.284
20210205	2021-02-05	60512200	Lianghe	237.27	0.284
20210206	2021-02-06	60512200	Lianghe	237.24	0.214
20210207	2021-02-07	60512200	Lianghe	237.25	0.215
20210208	2021-02-08	60512200	Lianghe	237.27	0.284
20210209	2021-02-09	60512200	Lianghe	237.52	2.03
20210210	2021-02-10	60512200	Lianghe	237.28	0.325
20210211	2021-02-11	60512200	Lianghe	237.27	0.284
20210212	2021-02-12	60512200	Lianghe	237.27	0.284
20210213	2021-02-13	60512200	Lianghe	237.26	0.247
20210214	2021-02-14	60512200	Lianghe	237.26	0.247
20210215	2021-02-15	60512200	Lianghe	237.26	0.247
20210216	2021-02-16	60512200	Lianghe	237.36	0.863
20210217	2021-02-17	60512200	Lianghe	237.35	0.789
20210218	2021-02-18	60512200	Lianghe	237.55	2.00
20210219	2021-02-19	60512200	Lianghe	237.52	2.03
20210220	2021-02-20	60512200	Lianghe	237.29	0.370
20210221	2021-02-21	60512200	Lianghe	237.21	0.140
20210222	2021-02-22	60512200	Lianghe	237.51	1.97
20210223	2021-02-23	60512200	Lianghe	237.28	0.325
20210224	2021-02-24	60512200	Lianghe	237.27	0.284
20210225	2021-02-25	60512200	Lianghe	237.26	0.247
20210226	2021-02-26	60512200	Lianghe	237.35	0.789
20210227	2021-02-27	60512200	Lianghe	237.55	2.00
20210228	2021-02-28	60512200	Lianghe	237.35	0.789
20210301	2021-03-01	60512200	Lianghe	237.34	0.663
20210302	2021-03-02	60512200	Lianghe	237.39	1.09
20210303	2021-03-03	60512200	Lianghe	237.45	1.57
20210304	2021-03-04	60512200	Lianghe	237.44	1.46
20210305	2021-03-05	60512200	Lianghe	237.33	0.596
20210306	2021-03-06	60512200	Lianghe	237.53	2.08
20210307	2021-03-07	60512200	Lianghe	237.52	2.03
20210308	2021-03-08	60512200	Lianghe	237.33	0.596
20210309	2021-03-09	60512200	Lianghe	237.35	0.789
20210310	2021-03-10	60512200	Lianghe	237.54	2.13
20210311	2021-03-11	60512200	Lianghe	237.45	1.57
20210312	2021-03-12	60512200	Lianghe	237.31	0.474
20210313	2021-03-13	60512200	Lianghe	237.31	0.474
20210314	2021-03-14	60512200	Lianghe	237.29	0.370
20210315	2021-03-15	60512200	Lianghe	237.27	0.284
20210316	2021-03-16	60512200	Lianghe	237.53	2.08
20210317	2021-03-17	60512200	Lianghe	237.30	0.420
20210318	2021-03-18	60512200	Lianghe	237.29	0.370
20210319	2021-03-19	60512200	Lianghe	237.35	0.789
20210320	2021-03-20	60512200	Lianghe	237.35	0.789
20210321	2021-03-21	60512200	Lianghe	237.30	0.420
20210322	2021-03-22	60512200	Lianghe	237.64	2.90
20210323	2021-03-23	60512200	Lianghe	237.41	1.23
20210324	2021-03-24	60512200	Lianghe	237.56	2.05
20210325	2021-03-25	60512200	Lianghe	237.36	0.863
20210326	2021-03-26	60512200	Lianghe	237.31	0.474
20210327	2021-03-27	60512200	Lianghe	237.56	2.05
20210328	2021-03-28	60512200	Lianghe	237.36	0.863
20210329	2021-03-29	60512200	Lianghe	237.33	0.596
20210330	2021-03-30	60512200	Lianghe	237.53	2.08
20210331	2021-03-31	60512200	Lianghe	237.62	2.62
20210401	2021-04-01	60512200	Lianghe	237.52	2.03
20210402	2021-04-02	60512200	Lianghe	238.00	18.1
20210403	2021-04-03	60512200	Lianghe	238.20	32.4
20210404	2021-04-04	60512200	Lianghe	237.83	9.00
20210405	2021-04-05	60512200	Lianghe	237.74	5.26
20210406	2021-04-06	60512200	Lianghe	237.69	3.78
20210407	2021-04-07	60512200	Lianghe	237.97	16.3
20210408	2021-04-08	60512200	Lianghe	237.94	14.6
20210409	2021-04-09	60512200	Lianghe	237.81	8.12
20210410	2021-04-10	60512200	Lianghe	237.74	5.26
20210411	2021-04-11	60512200	Lianghe	237.59	2.28
20210412	2021-04-12	60512200	Lianghe	237.68	3.55
20210413	2021-04-13	60512200	Lianghe	237.65	2.96
20210414	2021-04-14	60512200	Lianghe	237.61	2.49
20210415	2021-04-15	60512200	Lianghe	237.60	2.38
20210416	2021-04-16	60512200	Lianghe	237.33	0.596
20210417	2021-04-17	60512200	Lianghe	237.67	3.33
20210418	2021-04-18	60512200	Lianghe	237.74	5.26
20210419	2021-04-19	60512200	Lianghe	237.71	4.32
20210420	2021-04-20	60512200	Lianghe	237.69	3.78
20210421	2021-04-21	60512200	Lianghe	237.62	2.62
20210422	2021-04-22	60512200	Lianghe	237.69	3.78
20210423	2021-04-23	60512200	Lianghe	237.64	2.90
20210424	2021-04-24	60512200	Lianghe	237.61	2.49
20210425	2021-04-25	60512200	Lianghe	237.88	11.4
20210426	2021-04-26	60512200	Lianghe	237.82	8.56
20210427	2021-04-27	60512200	Lianghe	237.77	6.49
20210428	2021-04-28	60512200	Lianghe	237.72	4.61
20210429	2021-04-29	60512200	Lianghe	237.70	4.04
20210430	2021-04-30	60512200	Lianghe	237.65	2.96
20210501	2021-05-01	60512200	Lianghe	237.52	2.03
20210502	2021-05-02	60512200	Lianghe	237.48	1.78
20210503	2021-05-03	60512200	Lianghe	237.31	0.474
20210504	2021-05-04	60512200	Lianghe	237.59	2.28
20210505	2021-05-05	60512200	Lianghe	237.65	2.96
20210506	2021-05-06	60512200	Lianghe	237.69	3.78
20210507	2021-05-07	60512200	Lianghe	237.72	4.62
20210508	2021-05-08	60512200	Lianghe	237.66	3.14
20210509	2021-05-09	60512200	Lianghe	237.61	2.49
20210510	2021-05-10	60512200	Lianghe	237.57	2.11
20210511	2021-05-11	60512200	Lianghe	237.55	2.00
20210512	2021-05-12	60512200	Lianghe	237.91	12.9
20210513	2021-05-13	60512200	Lianghe	237.72	4.61
20210514	2021-05-14	60512200	Lianghe	237.78	6.88
20210515	2021-05-15	60512200	Lianghe	238.83	90.0
20210516	2021-05-16	60512200	Lianghe	237.96	15.7
20210517	2021-05-17	60512200	Lianghe	237.78	6.88
20210518	2021-05-18	60512200	Lianghe	237.70	4.04
20210519	2021-05-19	60512200	Lianghe	237.66	3.14
20210520	2021-05-20	60512200	Lianghe	238.00	18.1
20210521	2021-05-21	60512200	Lianghe	237.59	2.28
20210522	2021-05-22	60512200	Lianghe	237.36	0.863
20210523	2021-05-23	60512200	Lianghe	237.51	1.97
20210524	2021-05-24	60512200	Lianghe	237.31	0.474
20210525	2021-05-25	60512200	Lianghe	237.30	0.420
20210526	2021-05-26	60512200	Lianghe	237.61	2.49
20210527	2021-05-27	60512200	Lianghe	237.63	2.75
20210528	2021-05-28	60512200	Lianghe	237.58	2.19
20210529	2021-05-29	60512200	Lianghe	237.54	2.13
20210530	2021-05-30	60512200	Lianghe	237.31	0.474
20210531	2021-05-31	60512200	Lianghe	237.29	0.370
20210601	2021-06-01	60512200	Lianghe	237.47	1.71
20210602	2021-06-02	60512200	Lianghe	237.27	0.284
20210603	2021-06-03	60512200	Lianghe	237.28	0.325
20210604	2021-06-04	60512200	Lianghe	237.53	2.08
20210605	2021-06-05	60512200	Lianghe	237.45	1.57
20210606	2021-06-06	60512200	Lianghe	238.06	21.9
20210607	2021-06-07	60512200	Lianghe	237.79	7.29
20210608	2021-06-08	60512200	Lianghe	237.84	9.46
20210609	2021-06-09	60512200	Lianghe	238.10	24.6
20210610	2021-06-10	60512200	Lianghe	238.00	18.1
20210611	2021-06-11	60512200	Lianghe	238.13	26.8
20210612	2021-06-12	60512200	Lianghe	238.13	26.8
20210613	2021-06-13	60512200	Lianghe	238.21	33.1
20210614	2021-06-14	60512200	Lianghe	238.25	36.0
20210615	2021-06-15	60512200	Lianghe	238.17	30.0
20210616	2021-06-16	60512200	Lianghe	238.56	63.1
20210617	2021-06-17	60512200	Lianghe	238.12	26.0
20210618	2021-06-18	60512200	Lianghe	237.20	0.119
20210620	2021-06-20	60512200	Lianghe	237.31	0.474
20210621	2021-06-21	60512200	Lianghe	237.28	0.325
20210622	2021-06-22	60512200	Lianghe	237.28	0.325
20210623	2021-06-23	60512200	Lianghe	237.28	0.325
20210624	2021-06-24	60512200	Lianghe	237.51	1.97
20210625	2021-06-25	60512200	Lianghe	237.27	0.284
20210626	2021-06-26	60512200	Lianghe	237.67	3.33
20210627	2021-06-27	60512200	Lianghe	237.54	2.13
20210628	2021-06-28	60512200	Lianghe	237.67	3.33
20210629	2021-06-29	60512200	Lianghe	237.97	16.3
20210630	2021-06-30	60512200	Lianghe	237.76	6.11
20210701	2021-07-01	60512200	Lianghe	237.66	3.14
20210702	2021-07-02	60512200	Lianghe	237.64	2.90
20210703	2021-07-03	60512200	Lianghe	238.13	26.8
20210704	2021-07-04	60512200	Lianghe	237.78	6.88
20210705	2021-07-05	60512200	Lianghe	238.04	20.6
20210706	2021-07-06	60512200	Lianghe	237.93	14.0
20210707	2021-07-07	60512200	Lianghe	237.75	5.74
20210708	2021-07-08	60512200	Lianghe	237.88	11.4
20210709	2021-07-09	60512200	Lianghe	237.94	14.6
20210710	2021-07-10	60512200	Lianghe	237.79	7.29
20210711	2021-07-11	60512200	Lianghe	237.72	4.61
20210712	2021-07-12	60512200	Lianghe	237.80	7.70
20210713	2021-07-13	60512200	Lianghe	237.88	11.4
20210714	2021-07-14	60512200	Lianghe	237.71	4.32
20210715	2021-07-15	60512200	Lianghe	237.64	2.90
20210716	2021-07-16	60512200	Lianghe	237.62	2.49
20210717	2021-07-17	60512200	Lianghe	237.77	6.49
20210718	2021-07-18	60512200	Lianghe	237.69	3.78
20210719	2021-07-19	60512200	Lianghe	238.81	88.0
20210720	2021-07-20	60512200	Lianghe	237.81	8.12
20210721	2021-07-21	60512200	Lianghe	237.76	6.11
20210722	2021-07-22	60512200	Lianghe	237.72	4.61
20210723	2021-07-23	60512200	Lianghe	237.70	4.04
20210724	2021-07-24	60512200	Lianghe	237.66	3.14
20210725	2021-07-25	60512200	Lianghe	237.35	0.789
20210726	2021-07-26	60512200	Lianghe	237.37	0.937
20210727	2021-07-27	60512200	Lianghe	237.36	0.863
20210728	2021-07-28	60512200	Lianghe	237.65	2.96
20210729	2021-07-29	60512200	Lianghe	237.72	4.61
20210730	2021-07-30	60512200	Lianghe	237.42	1.31
20210731	2021-07-31	60512200	Lianghe	237.38	1.01
20210801	2021-08-01	60512200	Lianghe	237.55	2.00
20210802	2021-08-02	60512200	Lianghe	237.34	0.663
20210803	2021-08-03	60512200	Lianghe	237.33	0.596
20210804	2021-08-04	60512200	Lianghe	237.31	0.474
20210805	2021-08-05	60512200	Lianghe	237.29	0.370
20210806	2021-08-06	60512200	Lianghe	237.31	0.474
20210807	2021-08-07	60512200	Lianghe	237.28	0.325
20210808	2021-08-08	60512200	Lianghe	237.28	0.325
20210809	2021-08-09	60512200	Lianghe	237.83	9.00
20210810	2021-08-10	60512200	Lianghe	237.84	9.46
20210811	2021-08-11	60512200	Lianghe	238.03	20.0
20210812	2021-08-12	60512200	Lianghe	237.78	6.88
20210813	2021-08-13	60512200	Lianghe	238.88	94.9
20210814	2021-08-14	60512200	Lianghe	237.96	15.7
20210815	2021-08-15	60512200	Lianghe	237.80	7.70
20210816	2021-08-16	60512200	Lianghe	237.72	4.61
20210817	2021-08-17	60512200	Lianghe	237.67	3.33
20210818	2021-08-18	60512200	Lianghe	237.64	2.90
20210819	2021-08-19	60512200	Lianghe	237.54	2.13
20210820	2021-08-20	60512200	Lianghe	237.36	0.863
20210821	2021-08-21	60512200	Lianghe	237.37	0.937
20210822	2021-08-22	60512200	Lianghe	237.35	0.789
20210823	2021-08-23	60512200	Lianghe	237.84	9.46
20210824	2021-08-24	60512200	Lianghe	238.09	23.9
20210825	2021-08-25	60512200	Lianghe	237.84	9.46
20210826	2021-08-26	60512200	Lianghe	239.19	129
20210827	2021-08-27	60512200	Lianghe	239.05	114
20210828	2021-08-28	60512200	Lianghe	238.13	26.8
20210829	2021-08-29	60512200	Lianghe	238.00	18.1
20210830	2021-08-30	60512200	Lianghe	237.97	16.3
20210831	2021-08-31	60512200	Lianghe	237.77	6.49
20210901	2021-09-01	60512200	Lianghe	237.75	5.74
20210902	2021-09-02	60512200	Lianghe	237.72	4.61
20210903	2021-09-03	60512200	Lianghe	237.70	4.04
20210904	2021-09-04	60512200	Lianghe	237.68	3.55
20210905	2021-09-05	60512200	Lianghe	237.63	2.75
20210906	2021-09-06	60512200	Lianghe	237.40	1.16
20210907	2021-09-07	60512200	Lianghe	237.83	9.00
20210908	2021-09-08	60512200	Lianghe	237.74	5.26
20210909	2021-09-09	60512200	Lianghe	237.67	3.33
20210910	2021-09-10	60512200	Lianghe	237.63	2.75
20210911	2021-09-11	60512200	Lianghe	237.62	2.62
20210912	2021-09-12	60512200	Lianghe	238.00	18.1
20210913	2021-09-13	60512200	Lianghe	237.79	7.29
20210914	2021-09-14	60512200	Lianghe	237.69	3.78
20210915	2021-09-15	60512200	Lianghe	237.66	3.14
20210916	2021-09-16	60512200	Lianghe	237.62	2.62
20210917	2021-09-17	60512200	Lianghe	238.01	18.7
20210918	2021-09-18	60512200	Lianghe	237.82	8.56
20210919	2021-09-19	60512200	Lianghe	238.36	45.1
20210920	2021-09-20	60512200	Lianghe	237.88	11.4
20210921	2021-09-21	60512200	Lianghe	237.75	5.74
20210922	2021-09-22	60512200	Lianghe	237.70	4.04
20210923	2021-09-23	60512200	Lianghe	237.66	3.14
20210924	2021-09-24	60512200	Lianghe	237.62	2.62
20210925	2021-09-25	60512200	Lianghe	237.41	1.23
20210926	2021-09-26	60512200	Lianghe	237.41	1.23
20210927	2021-09-27	60512200	Lianghe	237.37	0.937
20210928	2021-09-28	60512200	Lianghe	237.38	1.01
20210929	2021-09-29	60512200	Lianghe	237.37	0.937
20210930	2021-09-30	60512200	Lianghe	237.37	0.937
20211001	2021-10-01	60512200	Lianghe	237.34	0.663
20211002	2021-10-02	60512200	Lianghe	237.33	0.596
20211003	2021-10-03	60512200	Lianghe	237.32	0.533
20211004	2021-10-04	60512200	Lianghe	237.32	0.533
20211005	2021-10-05	60512200	Lianghe	237.34	0.663
20211006	2021-10-06	60512200	Lianghe	237.32	0.533
20211007	2021-10-07	60512200	Lianghe	237.35	0.789
20211008	2021-10-08	60512200	Lianghe	237.14	0.0380
20211009	2021-10-09	60512200	Lianghe	237.23	0.187
20211010	2021-10-10	60512200	Lianghe	237.27	0.284
20211011	2021-10-11	60512200	Lianghe	237.57	2.11
20211012	2021-10-12	60512200	Lianghe	237.54	2.13
20211013	2021-10-13	60512200	Lianghe	237.45	1.57
20211014	2021-10-14	60512200	Lianghe	237.43	1.38
20211015	2021-10-15	60512200	Lianghe	237.31	0.474
20211016	2021-10-16	60512200	Lianghe	237.87	10.9
20211017	2021-10-17	60512200	Lianghe	237.92	13.5
20211018	2021-10-18	60512200	Lianghe	237.72	4.61
20211019	2021-10-19	60512200	Lianghe	237.63	2.75
20211020	2021-10-20	60512200	Lianghe	237.62	2.62
20211021	2021-10-21	60512200	Lianghe	237.63	2.75
20211022	2021-10-22	60512200	Lianghe	237.57	2.11
20211023	2021-10-23	60512200	Lianghe	237.54	2.13
20211024	2021-10-24	60512200	Lianghe	237.49	1.85
20211025	2021-10-25	60512200	Lianghe	237.48	1.78
20211026	2021-10-26	60512200	Lianghe	237.47	1.71
20211027	2021-10-27	60512200	Lianghe	237.39	1.09
20211028	2021-10-28	60512200	Lianghe	237.24	0.214
20211029	2021-10-29	60512200	Lianghe	237.23	0.187
20211030	2021-10-30	60512200	Lianghe	237.22	0.163
20211031	2021-10-31	60512200	Lianghe	237.22	0.163
20211101	2021-11-01	60512200	Lianghe	237.40	1.16
20211102	2021-11-02	60512200	Lianghe	237.24	0.214
20211103	2021-11-03	60512200	Lianghe	237.23	0.187
20211104	2021-11-04	60512200	Lianghe	237.40	1.16
20211105	2021-11-05	60512200	Lianghe	237.23	0.187
20211106	2021-11-06	60512200	Lianghe	237.20	0.119
20211107	2021-11-07	60512200	Lianghe	237.71	4.32
20211108	2021-11-08	60512200	Lianghe	237.61	2.49
20211109	2021-11-09	60512200	Lianghe	237.54	2.13
20211110	2021-11-10	60512200	Lianghe	237.51	1.97
20211111	2021-11-11	60512200	Lianghe	237.46	1.64
20211112	2021-11-12	60512200	Lianghe	237.42	1.31
20211113	2021-11-13	60512200	Lianghe	237.25	0.215
20211114	2021-11-14	60512200	Lianghe	237.24	0.214
20211115	2021-11-15	60512200	Lianghe	237.24	0.214
20211116	2021-11-16	60512200	Lianghe	237.27	0.284
20211117	2021-11-17	60512200	Lianghe	237.51	1.97
20211118	2021-11-18	60512200	Lianghe	237.52	2.03
20211119	2021-11-19	60512200	Lianghe	237.34	0.663
20211120	2021-11-20	60512200	Lianghe	237.34	0.663
20211121	2021-11-21	60512200	Lianghe	237.55	2.00
20211122	2021-11-22	60512200	Lianghe	237.84	9.46
20211123	2021-11-23	60512200	Lianghe	237.66	3.14
20211124	2021-11-24	60512200	Lianghe	237.59	2.28
20211125	2021-11-25	60512200	Lianghe	237.56	2.05
20211126	2021-11-26	60512200	Lianghe	237.53	2.08
20211127	2021-11-27	60512200	Lianghe	237.47	1.71
20211128	2021-11-28	60512200	Lianghe	237.44	1.46
20211129	2021-11-29	60512200	Lianghe	237.29	0.370
20211130	2021-11-30	60512200	Lianghe	237.28	0.325
20211201	2021-12-01	60512200	Lianghe	237.29	0.370
20211202	2021-12-02	60512200	Lianghe	237.30	0.420
20211203	2021-12-03	60512200	Lianghe	237.52	2.03
20211204	2021-12-04	60512200	Lianghe	237.50	1.91
20211205	2021-12-05	60512200	Lianghe	237.50	1.91
20211206	2021-12-06	60512200	Lianghe	237.28	0.325
20211207	2021-12-07	60512200	Lianghe	237.27	0.284
20211208	2021-12-08	60512200	Lianghe	237.47	1.71
20211209	2021-12-09	60512200	Lianghe	237.25	0.215
20211210	2021-12-10	60512200	Lianghe	237.25	0.215
20211211	2021-12-11	60512200	Lianghe	237.25	0.215
20211212	2021-12-12	60512200	Lianghe	237.31	0.474
20211213	2021-12-13	60512200	Lianghe	237.51	1.97
20211214	2021-12-14	60512200	Lianghe	237.48	1.78
20211215	2021-12-15	60512200	Lianghe	237.29	0.370
20211216	2021-12-16	60512200	Lianghe	237.29	0.370
20211217	2021-12-17	60512200	Lianghe	237.48	1.78
20211218	2021-12-18	60512200	Lianghe	237.31	0.474
20211219	2021-12-19	60512200	Lianghe	237.30	0.420
20211220	2021-12-20	60512200	Lianghe	237.50	1.91
20211221	2021-12-21	60512200	Lianghe	237.50	1.91
20211222	2021-12-22	60512200	Lianghe	237.26	0.247
20211223	2021-12-23	60512200	Lianghe	237.24	0.214
20211224	2021-12-24	60512200	Lianghe	237.47	1.71
20211226	2021-12-26	60512200	Lianghe	237.24	0.214
20211227	2021-12-27	60512200	Lianghe	237.24	0.214
20211228	2021-12-28	60512200	Lianghe	237.24	0.214
20211229	2021-12-29	60512200	Lianghe	237.48	1.78
20211230	2021-12-30	60512200	Lianghe	237.47	1.71
20211231	2021-12-31	60512200	Lianghe	237.25	0.215
20220101	2022-01-01	60512200	Lianghe	237.24	0.214
20220103	2022-01-03	60512200	Lianghe	237.24	0.214
20220104	2022-01-04	60512200	Lianghe	237.24	0.214
20220105	2022-01-05	60512200	Lianghe	237.24	0.214
20220106	2022-01-06	60512200	Lianghe	237.46	1.64
20220107	2022-01-07	60512200	Lianghe	237.25	0.215
20220108	2022-01-08	60512200	Lianghe	237.25	0.215
20220109	2022-01-09	60512200	Lianghe	237.25	0.215
20220110	2022-01-10	60512200	Lianghe	237.25	0.215
20220111	2022-01-11	60512200	Lianghe	237.25	0.215
20220112	2022-01-12	60512200	Lianghe	237.25	0.215
20220113	2022-01-13	60512200	Lianghe	237.25	0.215
20220114	2022-01-14	60512200	Lianghe	237.25	0.215
20220115	2022-01-15	60512200	Lianghe	237.25	0.215
20220116	2022-01-16	60512200	Lianghe	237.25	0.215
20220117	2022-01-17	60512200	Lianghe	237.28	0.325
20220118	2022-01-18	60512200	Lianghe	237.26	0.247
20220119	2022-01-19	60512200	Lianghe	237.25	0.215
20220120	2022-01-20	60512200	Lianghe	237.25	0.215
20220121	2022-01-21	60512200	Lianghe	237.30	0.420
20220124	2022-01-24	60512200	Lianghe	237.52	1.97
20220125	2022-01-25	60512200	Lianghe	237.52	2.03
20220126	2022-01-26	60512200	Lianghe	237.52	2.03
20220127	2022-01-27	60512200	Lianghe	237.56	2.05
20220128	2022-01-28	60512200	Lianghe	237.55	2.00
20220129	2022-01-29	60512200	Lianghe	237.58	2.19
20220130	2022-01-30	60512200	Lianghe	237.61	2.49
20220131	2022-01-31	60512200	Lianghe	237.36	0.863
20220201	2022-02-01	60512200	Lianghe	237.55	2.00
20220202	2022-02-02	60512200	Lianghe	237.34	0.663
20220203	2022-02-03	60512200	Lianghe	237.52	2.03
20220204	2022-02-04	60512200	Lianghe	237.52	2.03
20220205	2022-02-05	60512200	Lianghe	237.30	0.420
20220206	2022-02-06	60512200	Lianghe	237.30	0.420
20220207	2022-02-07	60512200	Lianghe	237.58	2.19
20220208	2022-02-08	60512200	Lianghe	237.58	2.19
20220209	2022-02-09	60512200	Lianghe	237.58	2.19
20220210	2022-02-10	60512200	Lianghe	237.33	0.596
20220211	2022-02-11	60512200	Lianghe	237.32	0.533
20220212	2022-02-12	60512200	Lianghe	237.52	2.03
20220213	2022-02-13	60512200	Lianghe	237.43	1.38
20220214	2022-02-14	60512200	Lianghe	237.30	0.420
20220215	2022-02-15	60512200	Lianghe	237.31	0.474
20220216	2022-02-16	60512200	Lianghe	237.29	0.370
20220217	2022-02-17	60512200	Lianghe	237.28	0.325
20220218	2022-02-18	60512200	Lianghe	237.29	0.370
20220219	2022-02-19	60512200	Lianghe	237.27	0.284
20220220	2022-02-20	60512200	Lianghe	237.27	0.284
20220221	2022-02-21	60512200	Lianghe	237.27	0.284
20220222	2022-02-22	60512200	Lianghe	237.31	0.474
20220224	2022-02-24	60512200	Lianghe	237.52	2.03
20220225	2022-02-25	60512200	Lianghe	237.32	0.533
20220226	2022-02-26	60512200	Lianghe	237.32	0.533
20220227	2022-02-27	60512200	Lianghe	237.32	0.533
20220228	2022-02-28	60512200	Lianghe	237.32	0.533
20220301	2022-03-01	60512200	Lianghe	237.52	2.03
20220302	2022-03-02	60512200	Lianghe	237.31	0.474
20220303	2022-03-03	60512200	Lianghe	237.31	0.474
20220304	2022-03-04	60512200	Lianghe	237.31	0.474
20220305	2022-03-05	60512200	Lianghe	237.31	0.474
20220306	2022-03-06	60512200	Lianghe	237.32	0.533
20220307	2022-03-07	60512200	Lianghe	237.32	0.533
20220308	2022-03-08	60512200	Lianghe	237.32	0.533
20220309	2022-03-09	60512200	Lianghe	237.32	0.533
20220310	2022-03-10	60512200	Lianghe	237.31	0.474
20220311	2022-03-11	60512200	Lianghe	237.51	1.97
20220312	2022-03-12	60512200	Lianghe	237.30	0.420
20220313	2022-03-13	60512200	Lianghe	237.30	0.420
20220314	2022-03-14	60512200	Lianghe	237.29	0.399
20220315	2022-03-15	60512200	Lianghe	237.29	0.399
20220316	2022-03-16	60512200	Lianghe	237.29	0.399
20220317	2022-03-17	60512200	Lianghe	237.29	0.399
20220318	2022-03-18	60512200	Lianghe	237.29	0.399
20220319	2022-03-19	60512200	Lianghe	237.28	0.355
20220320	2022-03-20	60512200	Lianghe	237.28	0.355
20220321	2022-03-21	60512200	Lianghe	237.28	0.355
20220322	2022-03-22	60512200	Lianghe	237.48	1.80
20220323	2022-03-23	60512200	Lianghe	237.28	0.355
20220324	2022-03-24	60512200	Lianghe	237.28	0.355
20220325	2022-03-25	60512200	Lianghe	237.28	0.355
20220326	2022-03-26	60512200	Lianghe	237.30	0.446
20220327	2022-03-27	60512200	Lianghe	237.75	5.24
20220328	2022-03-28	60512200	Lianghe	237.61	2.70
20220329	2022-03-29	60512200	Lianghe	237.55	2.17
20220330	2022-03-30	60512200	Lianghe	237.41	1.20
20220331	2022-03-31	60512200	Lianghe	237.73	4.75
20220401	2022-04-01	60512200	Lianghe	238.04	19.6
20220402	2022-04-02	60512200	Lianghe	237.89	11.3
20220403	2022-04-03	60512200	Lianghe	237.68	3.61
20220404	2022-04-04	60512200	Lianghe	237.61	2.70
20220405	2022-04-05	60512200	Lianghe	237.64	3.07
20220406	2022-04-06	60512200	Lianghe	237.59	2.49
20220407	2022-04-07	60512200	Lianghe	237.38	0.973
20220408	2022-04-08	60512200	Lianghe	237.36	0.832
20220409	2022-04-09	60512200	Lianghe	237.50	1.95
20220410	2022-04-10	60512200	Lianghe	237.42	1.27
20220411	2022-04-11	60512200	Lianghe	237.31	0.497
20220412	2022-04-12	60512200	Lianghe	237.33	0.610
20220413	2022-04-13	60512200	Lianghe	237.96	15.0
20220414	2022-04-14	60512200	Lianghe	237.76	5.55
20220415	2022-04-15	60512200	Lianghe	237.98	16.1
20220416	2022-04-16	60512200	Lianghe	237.92	12.8
20220417	2022-04-17	60512200	Lianghe	237.80	7.00
20220418	2022-04-18	60512200	Lianghe	237.70	4.02
20220419	2022-04-19	60512200	Lianghe	237.66	3.26
20220420	2022-04-20	60512200	Lianghe	237.64	3.07
20220421	2022-04-21	60512200	Lianghe	237.61	2.70
20220422	2022-04-22	60512200	Lianghe	237.57	2.32
20220423	2022-04-23	60512200	Lianghe	237.34	0.672
20220424	2022-04-24	60512200	Lianghe	237.32	0.552
20220425	2022-04-25	60512200	Lianghe	237.68	3.61
20220426	2022-04-26	60512200	Lianghe	237.60	2.59
20220427	2022-04-27	60512200	Lianghe	237.58	2.40
20220428	2022-04-28	60512200	Lianghe	237.67	3.43
20220429	2022-04-29	60512200	Lianghe	238.10	23.3
20220430	2022-04-30	60512200	Lianghe	237.89	11.3
20220501	2022-05-01	60512200	Lianghe	237.80	7.00
20220502	2022-05-02	60512200	Lianghe	237.65	3.11
20220503	2022-05-03	60512200	Lianghe	237.63	2.94
20220504	2022-05-04	60512200	Lianghe	237.60	2.59
20220505	2022-05-05	60512200	Lianghe	237.56	2.24
20220506	2022-05-06	60512200	Lianghe	237.33	0.610
20220507	2022-05-07	60512200	Lianghe	237.29	0.399
20220508	2022-05-08	60512200	Lianghe	237.46	1.64
20220509	2022-05-09	60512200	Lianghe	237.28	0.355
20220510	2022-05-10	60512200	Lianghe	237.90	11.8
20220511	2022-05-11	60512200	Lianghe	237.68	3.61
20220512	2022-05-12	60512200	Lianghe	237.61	2.70
20220513	2022-05-13	60512200	Lianghe	237.56	2.24
20220514	2022-05-14	60512200	Lianghe	237.51	2.02
20220515	2022-05-15	60512200	Lianghe	237.61	2.70
20220516	2022-05-16	60512200	Lianghe	237.36	0.832
20220517	2022-05-17	60512200	Lianghe	237.35	0.764
20220518	2022-05-18	60512200	Lianghe	237.53	2.16
20220519	2022-05-19	60512200	Lianghe	237.68	3.61
20220520	2022-05-20	60512200	Lianghe	237.66	3.26
20220521	2022-05-21	60512200	Lianghe	237.55	2.17
20220522	2022-05-22	60512200	Lianghe	237.64	3.07
20220523	2022-05-23	60512200	Lianghe	237.58	2.40
20220524	2022-05-24	60512200	Lianghe	237.53	2.16
20220525	2022-05-25	60512200	Lianghe	237.34	0.672
20220526	2022-05-26	60512200	Lianghe	237.34	0.672
20220527	2022-05-27	60512200	Lianghe	237.56	2.24
20220528	2022-05-28	60512200	Lianghe	237.92	12.8
20220529	2022-05-29	60512200	Lianghe	237.81	7.42
20220530	2022-05-30	60512200	Lianghe	237.67	3.43
20220531	2022-05-31	60512200	Lianghe	237.61	2.70
20220601	2022-06-01	60512200	Lianghe	237.57	2.32
20220602	2022-06-02	60512200	Lianghe	237.54	2.23
20220603	2022-06-03	60512200	Lianghe	237.42	1.27
20220604	2022-06-04	60512200	Lianghe	237.67	3.43
20220605	2022-06-05	60512200	Lianghe	237.94	13.9
20220606	2022-06-06	60512200	Lianghe	237.74	5.03
20220607	2022-06-07	60512200	Lianghe	237.66	3.26
20220608	2022-06-08	60512200	Lianghe	237.62	2.81
20220609	2022-06-09	60512200	Lianghe	237.58	2.40
20220610	2022-06-10	60512200	Lianghe	237.36	0.832
20220611	2022-06-11	60512200	Lianghe	237.35	0.764
20220612	2022-06-12	60512200	Lianghe	237.77	5.88
20220613	2022-06-13	60512200	Lianghe	237.76	5.55
20220614	2022-06-14	60512200	Lianghe	237.67	3.43
20220615	2022-06-15	60512200	Lianghe	237.62	2.81
20220616	2022-06-16	60512200	Lianghe	237.57	2.32
20220617	2022-06-17	60512200	Lianghe	237.43	1.35
20220618	2022-06-18	60512200	Lianghe	237.33	0.610
20220619	2022-06-19	60512200	Lianghe	239.12	116
20220620	2022-06-20	60512200	Lianghe	237.90	11.8
20220621	2022-06-21	60512200	Lianghe	237.77	5.88
20220622	2022-06-22	60512200	Lianghe	237.69	3.81
20220623	2022-06-23	60512200	Lianghe	237.64	3.07
20220624	2022-06-24	60512200	Lianghe	237.69	3.81
20220625	2022-06-25	60512200	Lianghe	237.62	2.81
20220626	2022-06-26	60512200	Lianghe	237.56	2.24
20220627	2022-06-27	60512200	Lianghe	238.21	30.7
20220628	2022-06-28	60512200	Lianghe	237.97	15.5
20220629	2022-06-29	60512200	Lianghe	237.72	4.49
20220630	2022-06-30	60512200	Lianghe	237.67	3.43
20220701	2022-07-01	60512200	Lianghe	237.60	2.59
20220702	2022-07-02	60512200	Lianghe	237.62	2.81
20220703	2022-07-03	60512200	Lianghe	237.75	5.24
20220704	2022-07-04	60512200	Lianghe	237.56	2.24
20220705	2022-07-05	60512200	Lianghe	237.55	2.17
20220706	2022-07-06	60512200	Lianghe	237.54	2.23
20220707	2022-07-07	60512200	Lianghe	237.48	1.80
20220708	2022-07-08	60512200	Lianghe	237.26	0.279
20220710	2022-07-10	60512200	Lianghe	237.26	0.279
20220711	2022-07-11	60512200	Lianghe	237.24	0.237
20220712	2022-07-12	60512200	Lianghe	237.24	0.237
20220713	2022-07-13	60512200	Lianghe	237.24	0.237
20220714	2022-07-14	60512200	Lianghe	237.42	1.27
20220715	2022-07-15	60512200	Lianghe	237.22	0.183
20220716	2022-07-16	60512200	Lianghe	237.22	0.183
20220717	2022-07-17	60512200	Lianghe	237.21	0.159
20220718	2022-07-18	60512200	Lianghe	237.27	0.315
20220719	2022-07-19	60512200	Lianghe	237.46	1.64
20220720	2022-07-20	60512200	Lianghe	237.46	1.64
20220721	2022-07-21	60512200	Lianghe	237.26	0.279
20220722	2022-07-22	60512200	Lianghe	237.25	0.246
20220723	2022-07-23	60512200	Lianghe	237.25	0.246
20220724	2022-07-24	60512200	Lianghe	237.23	0.209
20220725	2022-07-25	60512200	Lianghe	237.22	0.183
[truncated: 159 more rows]
